# Supplementary material for: Redox Imbalance and Methylation Disturbances in Early Childhood Obesity
Source: Hindawi journal article supplement (doi:10.1155/2021/2207125), 2021-01-01
Supplement: f1 [file 2207125.f1.pdf]

# Supplementary Table 1

## A - Correlation of clinical and biochemical parameters in Healthy Lean and Healthy Obese participants

|                    | BMi2     | WC        | SBP      | DBP      | HR       | Insulin  | Glucose   | HOMA-IR  | HOMA-B   | LDL      | HDL      | Triglycerides | Total cholesterol | NEFA   | Glycerol | Lactate  | CSP      | Leptin   | Adiponectin | Methionine | SAM     | SAH    | Adenosine | Total homocysteine | Total Cysteine | Free Cysteine | Cysteine | Total Reduced GSH | Free Reduced GSH | GSSG   | Cystinylglycine | Total γ-Glutamyl-Cysteine | Oxidized GSH | 3-Chloro-tyrosine | 3-Nitro-tyrosine |       |
|--------------------|----------|-----------|----------|----------|----------|----------|-----------|----------|----------|----------|----------|---------------|-------------------|--------|----------|----------|----------|----------|-------------|------------|---------|--------|-----------|--------------------|----------------|---------------|----------|-------------------|------------------|--------|-----------------|---------------------------|--------------|-------------------|------------------|-------|
| BMi2               | 1        | 0.706***  | 0.425**  | 0.246    | 0.019    | 0.652*** | 0.052     | 0.593*** | 0.647*** | 0.197    | -0.244   | 0.136         | 0.048             | -0.024 | 0.098    | 0.076    | 0.173    | 0.727*** | 0.797***    | -0.189     | 0.161   | 0.199  | 0.248     | 0.202              | 0.367**        | 0.079         | 0.276    | 0.309*            | 0.038            | -0.006 | 0.234           | 0.357**                   | 0.0001       | 0.233             | 0.227            | 0.100 |
| WC                 | 0.547*** | 1         | 0.520    | 0.084    | 0.564*** | 0.001    | 0.547***  | 0.232*   | 0.607*** | 0.091    | -0.433** | 0.200*        | 0.006             | 0.143  | 0.217    | 0.397*** | 0.459*** | 0.214    | -0.483***   | 0.066      | 0.039   | 0.056  | 0.146     | 0.217              | 0.289**        | 0.217         | 0.289**  | 0.017             | 0.004            | 0.289  | 0.287           | 0.011                     | 0.219        | 0.119             | 0.171            | 0.021 |
| SBP                | 0.425**  | 0.249     | 1        | 0.575*** | 0.176    | 0.426**  | -0.139    | 0.390**  | 0.444**  | 0.281*   | 0.102    | 0.154         | 0.365*            | -0.011 | 0.051    | 0.038    | 0.220    | 0.341**  | -0.079      | 0.212      | 0.289** | 0.115  | -0.14     | -0.051             | 0.193          | 0.172         | 0.073    | 0.176             | 0.234            | 0.104  | 0.128           | 0.07                      | -0.035       | -0.123            | 0.001            |       |
| DBP                | 0.246    | 0.12      | 0.575*** | 1        | 0.09     | 0.277    | -0.133    | 0.246    | 0.307**  | 0.036    | 0.109    | 0.127         | 0.115             | 0.079  | 0.260    | 0.039    | 0.287    | 0.095    | -0.117      | 0.246      | 0.239   | 0.002  | -0.108    | 0.271              | 0.008          | 0.029         | -0.142   | 0.081             | 0.079            | -0.004 | -0.077          | 0.096                     | -0.255       | -0.083            | 0.001            |       |
| HR                 | 0.084    | 0.084     | 0.109    | 0.084    | 1        | 0.024    | 0.025     | 0.029    | 0.029    | 0.214    | -0.918   | -0.023        | 0.17              | 0.020  | -0.009   | -0.029   | -0.110   | 0.026    | 0.104       | -0.300*    | 0.026   | 0.026  | 0.026     | 0.026              | 0.026          | 0.026         | 0.026    | 0.026             | 0.026            | 0.026  | 0.026           | 0.026                     | 0.026        | 0.026             | 0.026            | 0.026 |
| Insulin            | 0.652*** | 0.546***  | 0.450**  | 0.277    | 0.052    | 1        | 0.190     | 0.369*** | 0.686*** | 0.067    | -0.125   | 0.339**       | 0.099             | 0.219  | -0.046   | 0.052    | 0.538*** | 0.703*** | -0.370**    | 0.311*     | 0.314*  | 0.198  | 0.152     | 0.246              | 0.238          | 0.186         | 0.194    | 0.208             | 0.075            | 0.012  | 0.197           | 0.028                     | 0.048        | 0.096             | -0.021           |       |
| Glucose            | 0.052    | 0.051     | 0.133    | -0.025   | -0.19    | 0.006    | 1         | 0.632    | 0.819*** | -0.078   | 0.056    | 0.027         | -0.071            | -0.147 | -0.085   | -0.266   | 0.181    | 0.046    | 0.231       | -0.117     | 0.085   | 0.187  | 0.117     | 0.085              | 0.187          | 0.142         | 0.089    | 0.176             | 0.067            | 0.184  | 0.122           | 0.332**                   | 0.026        | 0.174             | 0.188            |       |
| HOMA-IR            | 0.593*** | 0.514***  | 0.390**  | 0.244    | 0.059    | 0.596*** | 0.052     | 1        | 0.781*** | 0.069    | -0.139   | 0.392**       | 0.088             | -0.223 | -0.053   | 0.069    | 0.506*** | 0.655*** | -0.332*     | 0.314*     | 0.348** | 0.185  | 0.148     | 0.223              | 0.238          | 0.203         | 0.212    | 0.183             | 0.063            | 0.027  | 0.213           | 0.083                     | 0.074        | 0.003             |                  |       |
| HOMA-B             | 0.467*** | 0.328*    | 0.466**  | 0.307    | 0.209    | 0.866*** | -0.595*** | 0.738*** | 1        | 0.085    | 0.063    | 0.204         | 0.231             | -0.160 | -0.041   | 0.202    | 0.467*** | 0.537*** | -0.302*     | 0.235      | 0.141   | 0.091  | 0.056     | 0.107              | 0.055          | 0.064         | 0.034    | 0.13              | -0.017           | -0.035 | 0.008           | -0.075                    | -0.042       | 0.026             |                  |       |
| LDL                | 0.191    | 0.061     | 0.288*   | 0.036    | 0.234    | 0.007    | 0.078     | 0.169    | 0.384*   | 0.905*** | 0.124    | 0.237         | -0.041            | 0.133  | 0.251    | 0.064    | 0.063    | 0.169    | -0.002      | -0.079     | -0.012  | 0.175  | 0.375**   | 0.231              | 0.079          | 0.173         | 0.064    | -0.068            | 0.013            | 0.035  | 0.047           | -0.178                    | 0.178        | 0.013             |                  |       |
| HDL                | -0.244   | -0.485*** | -0.356** | -0.059   | -0.018   | -0.125   | 0.056     | -0.139   | -0.063   | -0.169   | 1        | -0.149        | 0.202             | 0.242  | 0.202    | 0.106    | -0.442** | -0.189   | 0.342*      | 0.080      | 0.080   | 0.080  | -0.126    | -0.181             | -0.154         | -0.064        | -0.12    | -0.128            | 0.027            | 0.157  | -0.027          | -0.205                    | -0.177       | -0.314*           |                  |       |
| Triglycerides      | 0.186    | 0.308*    | 0.154    | 0.127    | -0.023   | 0.339**  | 0.027     | 0.332*   | 0.204    | 0.344*   | -0.149   | 1             | 0.364*            | 0.015  | 0.303**  | 0.304*   | 0.235    | 0.234    | 0.269       | 0.269      | -0.072  | -0.185 | 0.079     | 0.055              | 0.114          | 0.078         | 0.133    | -0.101            | -0.102           | -0.016 | -0.107          | -0.033                    | 0.054        | -0.033            |                  |       |
| Total cholesterol  | 0.148    | 0.063     | 0.395**  | 0.115    | 0.170    | 0.099    | 0.071     | 0.088    | 0.133    | 0.367**  | 0.202    | 0.354*        | 1                 | 0.202  | 0.289    | 0.301*   | 0.056    | 0.205    | 0.249       | 0.134      | 0.195   | 0.078  | 0.132     | 0.086              | 0.086          | 0.086         | 0.086    | 0.086             | 0.086            | 0.086  | 0.086           | 0.086                     | 0.086        | 0.086             | 0.086            |       |
| NEFA               | -0.024   | 0.005     | -0.031   | 0.029    | 0.019    | 0.006    | 0.006     | 0.006    | 0.006    | 0.006    | 0.006    | 0.006         | 0.006             | 0.006  | 0.006    | 0.006    | 0.006    | 0.006    | 0.006       | 0.006      | 0.006   | 0.006  | 0.006     | 0.006              | 0.006          | 0.006         | 0.006    | 0.006             | 0.006            | 0.006  | 0.006           | 0.006                     | 0.006        | 0.006             | 0.006            |       |
| Glycerol           | 0.397*** | 0.430**   | 0.317*   | 0.246    | 0.036    | 0.397*** | 0.052     | 0.596*** | 0.647*** | 0.067    | -0.125   | 0.339**       | 0.099             | 0.219  | -0.046   | 0.052    | 0.538*** | 0.703*** | -0.370**    | 0.311*     | 0.314*  | 0.198  | 0.152     | 0.246              | 0.238          | 0.186         | 0.194    | 0.208             | 0.075            | 0.012  | 0.197           | 0.028                     | 0.048        | 0.096             | -0.021           |       |
| Lactate            | 0.173    | 0.217     | 0.289**  | 0.038    | 0.277    | 0.173    | 0.020     | 0.287    | 0.459*** | 0.036    | -0.109   | 0.287         | 0.095             | 0.260  | 0.039    | 0.287    | 0.459*** | 0.655*** | -0.332*     | 0.314*     | 0.348** | 0.185  | 0.148     | 0.223              | 0.238          | 0.203         | 0.212    | 0.183             | 0.063            | 0.027  | 0.213           | 0.083                     | 0.074        | 0.003             |                  |       |
| CSP                | 0.727*** | 0.797***  | 0.647*** | 0.307    | 0.209    | 0.866*** | -0.595*** | 0.738*** | 1        | 0.085    | 0.063    | 0.204         | 0.231             | -0.160 | -0.041   | 0.202    | 0.467*** | 0.537*** | -0.302*     | 0.235      | 0.141   | 0.091  | 0.056     | 0.107              | 0.055          | 0.064         | 0.034    | 0.13              | -0.017           | -0.035 | 0.008           | -0.075                    | -0.042       | 0.026             |                  |       |
| Leptin             | 0.593*** | 0.514***  | 0.390**  | 0.244    | 0.059    | 0.596*** | 0.052     | 0.781*** | 0.069    | -0.139   | -0.063   | 0.392**       | 0.088             | -0.223 | -0.053   | 0.069    | 0.506*** | 0.655*** | -0.332*     | 0.314*     | 0.348** | 0.185  | 0.148     | 0.223              | 0.238          | 0.203         | 0.212    | 0.183             | 0.063            | 0.027  | 0.213           | 0.083                     | 0.074        | 0.003             |                  |       |
| Adiponectin        | 0.467*** | 0.328*    | 0.466**  | 0.307    | 0.209    | 0.866*** | -0.595*** | 0.738*** | 1        | 0.085    | 0.063    | 0.204         | 0.231             | -0.160 | -0.041   | 0.202    | 0.467*** | 0.537*** | -0.302*     | 0.235      | 0.141   | 0.091  | 0.056     | 0.107              | 0.055          | 0.064         | 0.034    | 0.13              | -0.017           | -0.035 | 0.008           | -0.075                    | -0.042       | 0.026             |                  |       |
| Methionine         | 0.593*** | 0.514***  | 0.390**  | 0.244    | 0.059    | 0.596*** | 0.052     | 0.781*** | 0.069    | -0.139   | -0.063   | 0.392**       | 0.088             | -0.223 | -0.053   | 0.069    | 0.506*** | 0.655*** | -0.332*     | 0.314*     | 0.348** | 0.185  | 0.148     | 0.223              | 0.238          | 0.203         | 0.212    | 0.183             | 0.063            | 0.027  | 0.213           | 0.083                     | 0.074        | 0.003             |                  |       |
| SAM                | 0.467*** | 0.328*    | 0.466**  | 0.307    | 0.209    | 0.866*** | -0.595*** | 0.738*** | 1        | 0.085    | 0.063    | 0.204         | 0.231             | -0.160 | -0.041   | 0.202    | 0.467*** | 0.537*** | -0.302*     | 0.235      | 0.141   | 0.091  | 0.056     | 0.107              | 0.055          | 0.064         | 0.034    | 0.13              | -0.017           | -0.035 | 0.008           | -0.075                    | -0.042       | 0.026             |                  |       |
| SAH                | 0.593*** | 0.514***  | 0.390**  | 0.244    | 0.059    | 0.596*** | 0.052     | 0.781*** | 0.069    | -0.139   | -0.063   | 0.392**       | 0.088             | -0.223 | -0.053   | 0.069    | 0.506*** | 0.655*** | -0.332*     | 0.314*     | 0.348** | 0.185  | 0.148     | 0.223              | 0.238          | 0.203         | 0.212    | 0.183             | 0.063            | 0.027  | 0.213           | 0.083                     | 0.074        | 0.003             |                  |       |
| Adenosine          | 0.593*** | 0.514***  | 0.390**  | 0.244    | 0.059    | 0.596*** | 0.052     | 0.781*** | 0.069    | -0.139   | -0.063   | 0.392**       | 0.088             | -0.223 | -0.053   | 0.069    | 0.506*** | 0.655*** | -0.332*     | 0.314*     | 0.348** | 0.185  | 0.148     | 0.223              | 0.238          | 0.203         | 0.212    | 0.183             | 0.063            | 0.027  | 0.213           | 0.083                     | 0.074        | 0.003             |                  |       |
| Total homocysteine | 0.593*** | 0.514***  | 0.390**  | 0.244    | 0.059    | 0.596*** | 0.052     | 0.781*** | 0.069    | -0.139   | -0.063   | 0.392**       | 0.088             | -0.223 | -0.053   | 0.069    | 0.506*** | 0.655*** | -0.332*     | 0.314*     | 0.348** | 0.185  | 0.148     | 0.223              | 0.238          | 0.203         | 0.212    | 0.183             | 0.063            | 0.027  | 0.213           | 0.083                     | 0.074        | 0.003             |                  |       |
| Total Cysteine     | 0.593*** | 0.514***  | 0.390**  | 0.244    | 0.059    | 0.596*** | 0.052     | 0.781*** | 0.069    | -0.139   | -0.063   | 0.392**       | 0.088             | -0.223 | -0.053   | 0.069    | 0.506*** | 0.655*** | -0.332*     | 0.314*     | 0.348** | 0.185  | 0.148     | 0.223              | 0.238          | 0.203         | 0.212    | 0.183             | 0.063            | 0.027  | 0.213           | 0.083                     | 0.074        | 0.003             |                  |       |
| Free Cysteine      | 0.593*** | 0.514***  | 0.390**  | 0.244    | 0.059    | 0.596*** | 0.052     | 0.781*** | 0.069    | -0.139   | -0.063   | 0.392**       | 0.088             | -0.223 | -0.053   | 0.069    | 0.506*** | 0.655*** | -0.332*     | 0.314*     | 0.348** | 0.185  | 0.148     | 0.223              | 0.238          | 0.203         | 0.212    | 0.183             | 0.063            | 0.027  | 0.213           | 0.083                     | 0.074        | 0.003             |                  |       |
| Cysteine           | 0.593*** | 0.514***  | 0.390**  | 0.244    | 0.059    | 0.596*** | 0.052     | 0.781*** | 0.069    | -0.139   | -0.063   | 0.392**       | 0.088             | -0.223 | -0.053   | 0.069    | 0.506*** | 0.655*** | -0.332*     | 0.314*     | 0.348** | 0.185  | 0.148     | 0.223              | 0.238          | 0.203         | 0.212    | 0.183             | 0.063            | 0.027  | 0.213           | 0.083                     | 0.074        | 0.003             |                  |       |
| Total Reduced GSH  | 0.593*** | 0.514***  | 0.390**  | 0.244    | 0.059    | 0.596*** | 0.052     | 0.781*** | 0.069    | -0.139   | -0.063   | 0.392**       | 0.088             | -0.223 | -0.053   | 0.069    | 0.506*** | 0.655*** | -0.332*     | 0.314*     | 0.348** | 0.185  | 0.148     | 0.223              | 0.238          | 0.203         | 0.212    | 0.183             | 0.063            | 0.027  | 0.213           | 0.083                     | 0.074        | 0.003             |                  |       |
| Free Reduced GSH   | 0.593*** | 0.514***  | 0.390**  | 0.244    | 0.059    | 0.596*** | 0.052     | 0.781*** | 0.069    | -0.139   | -0.063   | 0.392**       | 0.088             | -0.223 | -0.053   | 0.069    | 0.506*** | 0.655*** | -0.332*     | 0.314*     | 0.348** | 0.185  | 0.148     | 0.223              | 0.238          | 0.203         | 0.212    | 0.183             | 0.063            | 0.027  | 0.213           | 0.083                     | 0.074        | 0.003             |                  |       |
| GSSG               | 0.593*** | 0.514***  | 0.390**  | 0.244    | 0.059    | 0.596*** | 0.052     | 0.781*** | 0.069    | -0.139   | -0.063   | 0.392**       | 0.088             | -0.223 | -0.053   | 0.069    | 0.506*** | 0.655*** | -0.332*     | 0.314*     | 0.348** | 0.185  | 0.148     | 0.223              | 0.238          | 0.203         | 0.212    | 0.183             | 0.063            | 0.027  | 0.              |                           |              |                   |                  |       |
