# Supplementary material for: Redox Imbalance and Methylation Disturbances in Early Childhood Obesity
Source: Hindawi journal article supplement (doi:10.1155/2021/2207125), 2021-01-01
Supplement: f2 [file 2207125.f2.pdf]

| DMP        | Chromosome | Position  | Genes                                   | $\Delta\beta$ | Log <sub>2</sub> Fold Change | FDR                |
|------------|------------|-----------|-----------------------------------------|---------------|------------------------------|--------------------|
| cg06905516 | 8          | 23022704  | TNFRSF10D                               | -0.0658172    | -0.118573078386117           | 0.0406335022523768 |
| cg08608222 | 4          | 1795499   | FGFR3;FGFR3;FGFR3                       | 0.0394691     | 0.974745939210874            | 0.0406335022523768 |
| cg00941856 | 10         | 101674581 | DNMBP                                   | -0.111603     | -0.203924257833641           | 0.0406335022523768 |
| cg24345551 | 6          | 33360652  | KIFC1                                   | -0.0843615    | -0.169964842922027           | 0.0406335022523768 |
| cg04798796 | 10         | 88855483  | GLUD1;FAM35A                            | 0.0128459     | 0.78019703680129             | 0.0406335022523768 |
| cg23638556 | 13         | 111010230 | COL4A2                                  | -0.0352772    | -0.0550357484555059          | 0.0406335022523768 |
| cg21183329 | 9          | 124976219 | LHX6;LHX6                               | 0.0138929     | 0.74410393169284             | 0.0406335022523768 |
| cg21545248 | 5          | 149402498 | HMGXB3                                  | -0.118147     | -0.21719840047772            | 0.0406335022523768 |
| cg14774480 | 11         | 102653516 | WTAPP1                                  | -0.0418546    | -0.0654491768029718          | 0.0406335022523768 |
| cg12792397 | 16         | 30703104  |                                         | 0.0183593     | 0.0277728147568009           | 0.0406335022523768 |
| cg06680214 | 6          | 33422417  | ZBTB9;ZBTB9                             | -0.00219952   | -0.381958984086785           | 0.0406335022523768 |
| cg25025968 | 11         | 4116056   | RRM1;RRM1                               | 0.016294      | 0.719573700587054            | 0.0406335022523768 |
| cg22624255 | 19         | 19779476  | ZNF101                                  | 0.0310168     | 1.09645945215441             | 0.0406335022523768 |
| cg22496450 | 13         | 61191016  |                                         | -0.0978919    | -0.21940906045832            | 0.0406335022523768 |
| cg19793131 | 11         | 96209225  | JRKL-AS1                                | -0.059185     | -0.100001142046094           | 0.0406335022523768 |
| cg20839991 | 6          | 33088941  | HLA-DPB2                                | -0.0333946    | -0.0517411832043036          | 0.0406335022523768 |
| cg26328741 | 16         | 2021947   | TBL3                                    | 0.022945      | 0.79535118403304             | 0.0406335022523768 |
| cg25261059 | 19         | 44031185  | ETHE1                                   | 0.0651899     | 0.359116864511103            | 0.0406335022523768 |
| cg11908852 | 1          | 38397237  | INPP5B                                  | 0.0118427     | 0.6256883641268              | 0.0406335022523768 |
| cg01039133 | 7          | 105752333 | SYPL1;SYPL1                             | 0.00909396    | 0.489729674847109            | 0.0406335022523768 |
| cg11483359 | 6          | 19712715  |                                         | -0.122321     | -0.225732875760143           | 0.0406335022523768 |
| cg04030138 | 11         | 11688731  |                                         | -0.0464161    | -0.078429240479446           | 0.0406335022523768 |
| cg17309592 | 3          | 49591741  | BSN                                     | 0.063166      | 0.656666673987389            | 0.0406335022523768 |
| cg03804985 | 9          | 130159694 | SLC2A8                                  | 0.0218871     | 0.957584345105923            | 0.0406335022523768 |
| cg19367466 | 12         | 123717773 | C12orf65;C12orf65                       | 0.0239812     | 0.645296872926284            | 0.0406335022523768 |
| cg25195309 | 1          | 225766155 | ENAH;ENAH                               | -0.079411     | -0.157638423092724           | 0.0406335022523768 |
| cg27461942 | 13         | 100229148 | LINC01039                               | -0.0875736    | -0.166330640866549           | 0.0406335022523768 |
| cg13985868 | 9          | 116102304 | WDR31;WDR31                             | 0.0320005     | 0.901413470591093            | 0.0406335022523768 |
| cg04982432 | 6          | 38306180  | BTBD9;BTBD9;BTBD9;BTBD9                 | -0.0823567    | -0.151053215855891           | 0.0406335022523768 |
| cg26836121 | 4          | 68388804  | CENPC                                   | -0.0492055    | -0.0818722905008148          | 0.0406335022523768 |
| cg05919975 | 12         | 57148848  |                                         | -0.124588     | -0.250471131538006           | 0.0406335022523768 |
| cg01395424 | 5          | 1277474   | TERT;TERT                               | 0.0260448     | 0.0419079803954786           | 0.0406335022523768 |
| cg19690486 | 19         | 14610252  |                                         | -0.0805528    | -0.144023830857933           | 0.0406335022523768 |
| cg22118655 | 22         | 37823656  | ELFN2                                   | 0.0533956     | 0.406558154153351            | 0.0415761721086483 |
| cg09693311 | 14         | 54936086  |                                         | -0.113309     | -0.213021346732731           | 0.043769606288123  |
| cg19816107 | 7          | 33101939  | NT5C3;NT5C3                             | 0.019855      | 0.537673887517361            | 0.043769606288123  |
| cg22735125 | 5          | 49725470  | EMB                                     | -0.0469106    | -0.0944772066336053          | 0.043769606288123  |
| cg26619035 | 7          | 87936923  | STEAP4                                  | -0.0302796    | -0.046427869957971           | 0.043769606288123  |
| cg01958008 | 3          | 128597156 | ACAD9                                   | -0.0734059    | -0.130324043830873           | 0.043769606288123  |
| cg06619047 | 16         | 8772199   | ABAT                                    | -0.0438772    | -0.0710378272646915          | 0.043769606288123  |
| cg19485344 | 16         | 53412025  | LOC102723373                            | -0.0995825    | -0.210052229134053           | 0.043769606288123  |
| cg16328610 | 6          | 83777335  | DOPEY1                                  | 0.0232185     | 0.568984409845287            | 0.043769606288123  |
| cg17691292 | 8          | 95654019  | ESRP1;ESRP1;ESRP1;ESRP1                 | 0.0169181     | 0.887744460855561            | 0.043769606288123  |
| cg01068252 | 9          | 128114429 | GAPVD1;GAPVD1;GAPVD1;GAPVD1             | -0.061445     | -0.104004747005541           | 0.043769606288123  |
| cg09544878 | 5          | 133747733 | CDKN2AIPNL                              | 0.0150824     | 0.595688483793804            | 0.043769606288123  |
| cg12922647 | 15         | 31396316  | TRPM1                                   | -0.0459696    | -0.0740164846463773          | 0.043769606288123  |
| cg00966078 | 1          | 23079320  | EPHB2;EPHB2                             | -0.0717216    | -0.119471672795221           | 0.043769606288123  |
| cg11784214 | 17         | 19479935  | SLC47A1                                 | -0.0493608    | -0.0826485677275705          | 0.043769606288123  |
| cg08558652 | 16         | 48389438  | LOC100507577;MIR548A2;MIR5095           | -0.0648793    | -0.119332688869588           | 0.0440437062548208 |
| cg03754076 | 1          | 232766254 |                                         | 0.0120227     | 0.883691752896239            | 0.0443669184970106 |
| cg12022339 | 19         | 52692933  | PPP2R1A;PPP2R1A                         | 0.00728751    | 0.596344457004661            | 0.0443669184970106 |
| cg06444855 | 5          | 38819991  | OSMR-AS1                                | -0.129331     | -0.251621936761016           | 0.0447999812308717 |
| cg18141295 | 1          | 193144639 | CDC73                                   | -0.0581567    | -0.102891227021625           | 0.044983718150736  |
| cg27190839 | 11         | 33097035  | LOC283267                               | -0.0825291    | -0.145795379258764           | 0.046223009450485  |
| cg09556666 | 15         | 72759065  |                                         | -0.130132     | -0.221196855675754           | 0.046223009450485  |
| cg13828275 | 20         | 32972747  | ITCH;ITCH;ITCH                          | -0.104588     | -0.203791900141478           | 0.046223009450485  |
| cg07397958 | 15         | 49476141  | GALK2;GALK2;GALK2;GALK2                 | -0.0984144    | -0.19665845869217            | 0.046223009450485  |
| cg01954686 | 7          | 150885654 | ASB10;ASB10;ASB10                       | -0.0878873    | -0.203971896025394           | 0.046223009450485  |
| cg16203711 | 3          | 169491183 | MYNN;MYNN                               | 0.0333015     | 1.2454653253385              | 0.046223009450485  |
| cg19870125 | 12         | 129604022 | TMEM132D                                | -0.0774623    | -0.129662360254565           | 0.046223009450485  |
| cg26654766 | 10         | 13343607  | PHYH                                    | -0.0619288    | -0.1256361516786             | 0.046223009450485  |
| cg11473272 | 3          | 125146553 |                                         | -0.0320996    | -0.0535671573005014          | 0.0469518271538882 |
| cg10400226 | 19         | 8325369   | CERS4                                   | -0.0889155    | -0.172782903719894           | 0.046991736038697  |
| cg15403961 | 4          | 173905761 | GALNTL6                                 | -0.0976913    | -0.211795241982064           | 0.046991736038697  |
| cg03365985 | 4          | 42399484  | SHISA3                                  | 0.00778769    | 0.677606960549186            | 0.046991736038697  |
| cg18749273 | 15         | 68569993  | FEM1B                                   | 0.0211876     | 0.686438817129089            | 0.046991736038697  |
| cg04783204 | 6          | 44191600  | SLC29A1;SLC29A1;SLC29A1;SLC29A1;SLC29A1 | 0.0166506     | 0.661884182897757            | 0.046991736038697  |
| cg23727374 | 20         | 30946786  | ASXL1;ASXL1                             | 0.0259131     | 0.829473915468712            | 0.046991736038697  |
| cg26332016 | 12         | 117348108 | FBXW8;FBXW8                             | -0.0935664    | -0.168735547779607           | 0.046991736038697  |
| cg04697629 | 1          | 221871655 |                                         | 0.00667726    | 0.0098353882842333           | 0.047418340765503  |
| cg00495931 | 20         | 43545321  | PABPC1L                                 | 0.00975951    | 0.0144618167571059           | 0.047418340765503  |
| cg24390275 | 6          | 56860507  | BEND6                                   | -0.0507518    | -0.082357266421499           | 0.047418340765503  |
| cg15609150 | 5          | 179197801 | MAML1                                   | -0.127225     | -0.314322405942136           | 0.0475625159781643 |
| cg10351795 | 3          | 133744113 | SLCO2A1                                 | -0.0582335    | -0.101351763105253           | 0.0475625159781643 |
| cg15539395 | 19         | 59086703  | MGC2752                                 | 0.0111455     | 0.444479205196505            | 0.0475625159781643 |
| cg21787516 | 7          | 105018109 | SRPK2                                   | -0.0585389    | -0.121459271970044           | 0.0475625159781643 |
| cg14595269 | 7          | 151216272 | RHEB                                    | 0.0624945     | 0.459211656415842            | 0.0501968659474078 |
| cg24808111 | 7          | 148889824 |                                         | -0.0930476    | -0.163425674175079           | 0.0502645183457041 |
| cg14819132 | 17         | 17495032  | PEMT                                    | 0.0110168     | 0.552637080591458            | 0.0503267269163535 |
| cg03425878 | 16         | 67038709  | CES4A;CES4A;CES4A;CES4A;CES4A           | 0.0075249     | 0.011103343569635            | 0.051809519065246  |
| cg02871554 | 18         | 21170124  |                                         | -0.0730601    | -0.148204424576289           | 0.051809519065246  |

|                |    |           |                                                                     |            |                     |                    |
|----------------|----|-----------|---------------------------------------------------------------------|------------|---------------------|--------------------|
| cg01897092     | 17 | 34057222  | RASL10B                                                             | -0.0929732 | -0.182672713771587  | 0.051809519065246  |
| cg05118364     | 16 | 3533812   | NAT15;NAT15;NAT15                                                   | -0.0846287 | -0.190323684358396  | 0.0518992411265714 |
| cg07218663     | 6  | 146350618 | GRM1;GRM1                                                           | 0.0215767  | 0.759816205989132   | 0.0518992411265714 |
| cg14870958     | 14 | 73029842  | RGS6                                                                | -0.0169623 | -0.0262293277588816 | 0.0518992411265714 |
| cg06817090     | 1  | 1334334   | CCNL2;CCNL2;CCNL2;LOC148413;CCNL2                                   | 0.00788647 | 0.658423581555615   | 0.0518992411265714 |
| cg21197273     | 3  | 11760785  | VGLL4;VGLL4                                                         | 0.00674041 | 0.329675701578179   | 0.0518992411265714 |
| cg19926395     | 7  | 150865207 | GBX1                                                                | 0.0131627  | 0.756565955490245   | 0.0518992411265714 |
| cg24736951     | 3  | 171114259 | TNIK;TNIK;TNIK;TNIK;TNIK;TNIK;TNIK;TNIK                             | -0.0327439 | -0.0513963795834923 | 0.0518992411265714 |
| cg24743229     | 1  | 110577591 | FAM40A                                                              | 0.0149933  | 0.610187961362712   | 0.0518992411265714 |
| cg00552822     | 15 | 22368443  | LOC727924;OR4M2                                                     | -0.0467413 | -0.081154430624211  | 0.0518992411265714 |
| cg11069461     | 7  | 64646466  | INTS4L1                                                             | -0.0602762 | -0.103756172770022  | 0.0518992411265714 |
| cg17381040     | 19 | 36102347  | HAUS5                                                               | -0.0438344 | -0.0675052757877374 | 0.0518992411265714 |
| cg14028272     | 1  | 229533222 |                                                                     | -0.0426454 | -0.0676282831023415 | 0.0518992411265714 |
| cg16420045     | 15 | 65350816  | RASL12;RASL12                                                       | 0.0125497  | 0.018931894521605   | 0.0518992411265714 |
| cg10148231     | 7  | 849153    |                                                                     | -0.0837718 | -0.157466745738593  | 0.0518992411265714 |
| cg25019777     | 4  | 53525403  | USP46;USP46                                                         | 0.0638011  | 0.747612200717906   | 0.0518992411265714 |
| cg06942121     | 16 | 2040985   | SYNGR3                                                              | 0.0133021  | 0.352113195237665   | 0.0518992411265714 |
| cg07437492     | 1  | 240434057 | FMN2;FMN2                                                           | -0.0795417 | -0.137991784328019  | 0.0518992411265714 |
| cg03436558     | 16 | 75657345  | ADAT1                                                               | 0.0156625  | 0.670138522872142   | 0.0518992411265714 |
| cg13441599     | 7  | 102715243 | ARMC10;ARMC10;ARMC10;ARMC10;ARMC10;ARMC10;FBXL13;FBXL13;FBXL13;FBXL | 0.0143272  | 0.707199146685249   | 0.0521912828346582 |
| cg00765721     | 2  | 159314180 | CCDC148;CCDC148;PKP4;PKP4                                           | 0.0197356  | 0.847271540952859   | 0.0523427652535012 |
| cg25188141     | 2  | 128633711 | AMMECR1L                                                            | -0.0449683 | -0.0726934465720912 | 0.0523427652535012 |
| cg11913696     | 14 | 77932535  | AHSA1                                                               | -0.0401746 | -0.06272643096699   | 0.0530636463671279 |
| cg04214520     | 3  | 195615359 | TNK2;TNK2                                                           | 0.00926496 | 0.0141591576252101  | 0.0535932816111014 |
| cg26077228     | 17 | 80408536  | C17orf62;C17orf62;C17orf62                                          | 0.020084   | 0.57835457517611    | 0.0540431130494622 |
| ch.7.53629068R | 7  | 53661574  |                                                                     | 0.0157414  | 0.574218083468763   | 0.0540431130494622 |
| cg23911661     | 1  | 45674993  |                                                                     | -0.0631038 | -0.107431194794865  | 0.0548512093997217 |
| cg22829819     | 16 | 69332313  | SNTB2                                                               | -0.0251278 | -0.0387431379226169 | 0.0553078981147217 |
| cg14438445     | 2  | 39221176  | 1 SOS                                                               | -0.0805308 | -0.147591525871211  | 0.055813348309455  |
| cg26219201     | 19 | 54585100  | TARM1                                                               | -0.03537   | -0.0573306766347431 | 0.055813348309455  |
| cg23169308     | 11 | 118881590 | CCDC84;CCDC84;CCDC84;CCDC84                                         | -0.0480654 | -0.0779793156481695 | 0.055813348309455  |
| cg22541808     | 17 | 40687226  | NAGLU                                                               | -0.0954657 | -0.199091471098774  | 0.055813348309455  |
| cg13062138     | 5  | 84374644  |                                                                     | -0.0619955 | -0.111361583050029  | 0.055813348309455  |
| cg14763763     | 22 | 24968468  | SNRPD3                                                              | -0.0388004 | -0.060877816398849  | 0.055813348309455  |
| cg16268848     | 2  | 109744586 | SH3RF3;LOC100287216                                                 | 0.0105337  | 0.537819392571178   | 0.055813348309455  |
| cg26750487     | 1  | 207818449 | CR1L                                                                | 0.0173059  | 0.514371026201175   | 0.055813348309455  |
| cg27506538     | 17 | 66588055  | FAM20A;FAM20A                                                       | -0.09743   | -0.187269246506453  | 0.055813348309455  |
| cg09471916     | 16 | 3131034   |                                                                     | -0.029647  | -0.047122895019374  | 0.055813348309455  |
| cg13255896     | 16 | 81352678  | GAN                                                                 | -0.069034  | -0.12444963085618   | 0.055813348309455  |
| cg09033276     | 3  | 195959363 | SLC51A                                                              | 0.00838916 | 0.0124007059740016  | 0.055813348309455  |
| cg23687258     | 6  | 106808749 |                                                                     | 0.0275197  | 0.609720799061538   | 0.055813348309455  |
| cg10588706     | 1  | 246305649 | SMYD3;SMYD3                                                         | -0.0645656 | -0.102507258072371  | 0.055813348309455  |
| cg20320896     | 7  | 144534283 | TPK1;TPK1                                                           | -0.0345839 | -0.0444971708448443 | 0.055813348309455  |
| cg18887033     | 2  | 7005947   | CMPK2                                                               | 0.0648362  | 0.378340898658906   | 0.055813348309455  |
| cg23330385     | 2  | 187385911 |                                                                     | -0.0504405 | -0.082993378432526  | 0.055813348309455  |
| cg22012693     | 8  | 139919163 | COL22A1                                                             | -0.123828  | -0.239281194342031  | 0.055813348309455  |
| cg09692037     | 2  | 16502224  |                                                                     | 0.00487629 | 0.00718098190072974 | 0.055813348309455  |
| cg27222589     | 12 | 52968762  | KRT74                                                               | -0.0522376 | -0.0859733717005815 | 0.055813348309455  |
| cg06069179     | 17 | 33288421  | CCT6B;CCT6B;ZNF830                                                  | 0.00863542 | 0.861337257139569   | 0.055813348309455  |
| cg22890950     | 10 | 122216135 | PPAPDC1A                                                            | 0.0309575  | 1.03127730117504    | 0.055813348309455  |
| cg09093477     | 5  | 34839189  | TTC23L                                                              | 0.010227   | 0.508915841176316   | 0.055813348309455  |
| cg18792956     | 3  | 34200625  |                                                                     | -0.0600788 | -0.123588531442679  | 0.055813348309455  |
| cg08877624     | 8  | 141521446 | CHRAC1;CHRAC1;CHRAC1                                                | 0.042238   | 0.455131570473645   | 0.055813348309455  |
| cg00730348     | 13 | 51482465  | RNASEH2B;RNASEH2B                                                   | -0.070874  | -0.133622260750994  | 0.055813348309455  |
| cg19522644     | 18 | 8717905   | KIAA0802                                                            | 0.0190401  | 0.0288183961717389  | 0.055813348309455  |
| cg09621945     | 8  | 28463758  |                                                                     | -0.0835957 | -0.147817735356274  | 0.055813348309455  |
| cg26187342     | 17 | 65713858  | NOL11                                                               | 0.0712932  | 0.375895822034881   | 0.0559831905624135 |
| cg08395298     | 4  | 185827243 |                                                                     | -0.0978363 | -0.200887195938918  | 0.0559831905624135 |
| cg15910486     | 5  | 142783621 | NR3C1;NR3C1;NR3C1;NR3C1;NR3C1;NR3C1;NR3C1                           | 0.02354    | 0.426344268044438   | 0.0559831905624135 |
| cg00665045     | 13 | 106158958 | DAOA-AS1                                                            | -0.0471648 | -0.0767215919000765 | 0.0559831905624135 |
| cg07576222     | 15 | 67357975  | SMAD3                                                               | 0.0344758  | 0.422248401839587   | 0.0559831905624135 |
| cg01572334     | 3  | 11079039  | PVRL3;PVRL3;PVRL3                                                   | 0.0125951  | 0.657405463127045   | 0.0559831905624135 |
| cg11081703     | 12 | 108909056 | FICD;FICD                                                           | 0.0191671  | 0.55778562129723    | 0.0559831905624135 |
| cg27133310     | 3  | 146263336 | PLSCR1                                                              | -0.0775021 | -0.155572325606891  | 0.0559831905624135 |
| cg25221988     | 16 | 1355400   |                                                                     | -0.0635851 | -0.110957098198338  | 0.0559831905624135 |
| cg24829631     | 1  | 19639165  | PQLC2;PQLC2;PQLC2;AKR7A2;PQLC2;PQLC2;PQLC2                          | 0.0247533  | 0.764576472714612   | 0.0559831905624135 |
| cg27233071     | 2  | 108964526 |                                                                     | -0.110408  | -0.287470836989028  | 0.0559831905624135 |
| cg01866220     | 16 | 28969554  | MIR4517;NFATC2IP                                                    | -0.0667816 | -0.114494766671256  | 0.0559831905624135 |
| cg03795316     | 10 | 12110955  | DHTKD1;DHTKD1                                                       | 0.0193955  | 0.936741597213522   | 0.0559831905624135 |
| cg07490276     | 14 | 70233797  | SFRS5;SFRS5;LOC100289511                                            | 0.0112441  | 0.313883441808425   | 0.0559831905624135 |
| cg00538011     | 15 | 90838172  |                                                                     | -0.0185722 | -0.0283914846492332 | 0.0559861534840211 |
| cg08276976     | 15 | 39411127  |                                                                     | -0.107957  | -0.219596349971089  | 0.0559861534840211 |
| cg01739401     | 12 | 51208362  | ATF1                                                                | -0.092756  | -0.165894002593466  | 0.0559861534840211 |
| cg11899080     | 17 | 64455086  | PRKCA                                                               | -0.0675417 | -0.115111713254451  | 0.0559861534840211 |
| cg03790378     | 11 | 47278831  | NR1H3;NR1H3;NR1H3                                                   | -0.0206605 | -0.0307861054909767 | 0.0559861534840211 |
| cg23162960     | 5  | 175875209 | FAF2                                                                | 0.00646354 | 0.673889128968056   | 0.0559861534840211 |
| cg10309250     | 17 | 42218412  | C17orf53;C17orf53                                                   | -0.0614571 | -0.120505086421667  | 0.0559861534840211 |
| cg13255559     | 1  | 195950882 |                                                                     | -0.0710974 | -0.132940044647617  | 0.0559861534840211 |
| cg08220548     | 18 | 76160443  |                                                                     | -0.0522116 | -0.0845241873178414 | 0.0559861534840211 |
| cg20154431     | 8  | 99053241  |                                                                     | -0.0782299 | -0.151207623236585  | 0.0559861534840211 |
| cg02956320     | 2  | 169643050 | NOSTRIN;NOSTRIN                                                     | -0.0732048 | -0.136584361306329  | 0.0559861534840211 |
| cg09907201     | 12 | 56237315  | MMP19                                                               | -0.0772043 | -0.138938635593102  | 0.0559861534840211 |

|            |    |           |                                                     |            |                     |                    |
|------------|----|-----------|-----------------------------------------------------|------------|---------------------|--------------------|
| cg01341130 | 15 | 76033361  | DNM1P35                                             | -0.079231  | -0.167513972963776  | 0.0559861534840211 |
| cg00108459 | 10 | 71123414  | HK1;HK1;HK1;HK1                                     | -0.0681939 | -0.12684526669541   | 0.0559861534840211 |
| cg07801516 | 19 | 37154552  | ZNF461                                              | -0.100201  | -0.296999147055265  | 0.0559861534840211 |
| cg07031794 | 2  | 26568949  | SELI;GPR113                                         | 0.0422561  | 0.418574728012646   | 0.0559861534840211 |
| cg16192320 | 1  | 206680748 | RASSF5;RASSF5                                       | 0.0335402  | 0.452700818756738   | 0.0559861534840211 |
| cg22592142 | 15 | 45409170  | DUOXA2                                              | 0.0293893  | 0.616817913138339   | 0.0559861534840211 |
| cg08968899 | 8  | 98961821  | MATN2;MATN2                                         | -0.03825   | -0.0642354844113241 | 0.0559861534840211 |
| cg00214165 | 5  | 7869652   | MTRR;FASTKD3;MTRR                                   | 0.0259222  | 0.617252421617214   | 0.0559861534840211 |
| cg03932842 | 7  | 65703474  | TPST1                                               | -0.0639981 | -0.127581848572873  | 0.0559861534840211 |
| cg19733916 | 14 | 89730642  | FOXN3;FOXN3                                         | -0.0656685 | -0.135941820180429  | 0.0559861534840211 |
| cg05961166 | 21 | 26864304  |                                                     | -0.0781734 | -0.133027134682021  | 0.0559861534840211 |
| cg15944824 | 17 | 40981088  |                                                     | -0.0818012 | -0.184848502141435  | 0.0559861534840211 |
| cg05064347 | 21 | 44395663  | PKNOX1;PKNOX1                                       | 0.0161528  | 0.993587504895866   | 0.0563145121749649 |
| cg03926815 | 3  | 13114681  | IQSEC1                                              | 0.052254   | 0.193044722906818   | 0.0572868736734894 |
| cg15137369 | 8  | 105801862 | LRP12;LRP12                                         | 0.0417737  | 0.769453792753036   | 0.0572868736734894 |
| cg09466312 | 4  | 580474    |                                                     | -0.0537069 | -0.0888681790125446 | 0.0572868736734894 |
| cg14084272 | 19 | 21654965  |                                                     | -0.0418435 | -0.0656111977576899 | 0.0572868736734894 |
| cg11212901 | 17 | 22020759  |                                                     | -0.055798  | -0.097512181749258  | 0.0572868736734894 |
| cg23137531 | 13 | 113622708 | MCF2L                                               | 0.0100786  | 0.618366978673968   | 0.0572868736734894 |
| cg25950438 | 14 | 34077154  | NPAS3;NPAS3;NPAS3;NPAS3                             | -0.11711   | -0.266786021306068  | 0.0572868736734894 |
| cg25601661 | 11 | 72525334  | ATG16L2                                             | 0.0413164  | 0.451617929244009   | 0.0572868736734894 |
| cg10084513 | 3  | 122745685 | SEMA5B                                              | 0.0123589  | 0.453920361553204   | 0.0572868736734894 |
| cg20630971 | 6  | 159308131 |                                                     | -0.0644269 | -0.116343624591644  | 0.0572868736734894 |
| cg21051843 | 1  | 211572088 | LINC00467                                           | -0.0395697 | -0.0664063532873141 | 0.0572868736734894 |
| cg10988122 | 11 | 64008466  | FKBP2;FKBP2;FKBP2;FKBP2                             | 0.0245015  | 0.656283876772511   | 0.0572868736734894 |
| cg06360875 | 11 | 22210253  |                                                     | -0.0729352 | -0.130297182369274  | 0.0572868736734894 |
| cg08759723 | 12 | 92027881  |                                                     | -0.0302957 | -0.0488642490988552 | 0.0572868736734894 |
| cg02338410 | 2  | 201763187 | NIF3L1;NIF3L1;NIF3L1;NIF3L1                         | -0.0714224 | -0.134044703312335  | 0.0572868736734894 |
| cg08926493 | 8  | 55224461  |                                                     | -0.0834109 | -0.143967132189412  | 0.0572868736734894 |
| cg25133757 | 16 | 23699709  | PLK1                                                | -0.0283159 | -0.0431774492361052 | 0.0572868736734894 |
| cg07231398 | 14 | 106671426 |                                                     | -0.0798193 | -0.165086995900561  | 0.0572868736734894 |
| cg15730068 | 4  | 164394686 | TKTL2                                               | -0.031713  | -0.0507374129267868 | 0.0572868736734894 |
| cg07570055 | 2  | 233387088 |                                                     | 0.0282292  | 0.726409712228598   | 0.0572868736734894 |
| cg01968242 | 8  | 98787927  | LAPTM4B;LAPTM4B                                     | 0.00940685 | 0.586594126021433   | 0.0572868736734894 |
| cg21434114 | 18 | 3450282   | TGIF1;TGIF1;TGIF1;TGIF1;TGIF1;TGIF1;TGIF1           | 0.0114361  | 0.493880400289997   | 0.0572868736734894 |
| cg06053850 | 11 | 76510871  |                                                     | -0.0923927 | -0.214695995802536  | 0.0572868736734894 |
| cg00868299 | 9  | 92306213  | UNQ6494                                             | -0.0576747 | -0.0944968190714708 | 0.0572868736734894 |
| cg27361617 | 21 | 32470484  |                                                     | -0.0773972 | -0.146996677296586  | 0.0572868736734894 |
| cg01320780 | 8  | 22298453  | PPP3CC                                              | 0.0133771  | 0.489587767704275   | 0.0572868736734894 |
| cg05781820 | 11 | 65090854  |                                                     | -0.056122  | -0.052254050733824  | 0.0572868736734894 |
| cg08150885 | 12 | 106751428 | POLR3B;POLR3B                                       | 0.00457615 | 0.351692989621085   | 0.0572868736734894 |
| cg26011210 | 12 | 122125276 |                                                     | 0.0423985  | 0.753624581929061   | 0.0572868736734894 |
| cg16559448 | 5  | 179870052 |                                                     | -0.0865249 | -0.18039597338438   | 0.0576655229937819 |
| cg23273364 | 2  | 198364778 | HSPE1;HSPE1;HSPD1;HSPD1                             | 0.0274053  | 1.04798103486208    | 0.0582213687880469 |
| cg01065278 | 1  | 9491741   |                                                     | -0.058609  | -0.0980094395562806 | 0.0583086963318465 |
| cg14853169 | 1  | 11113080  |                                                     | 0.0679488  | 0.680335664495851   | 0.0585466095117296 |
| cg09870152 | 1  | 171103714 |                                                     | -0.0917219 | -0.249045633082101  | 0.0585466095117296 |
| cg00295948 | 9  | 124261807 | GGTA1                                               | 0.021646   | 0.373596405593771   | 0.0585466095117296 |
| cg09419983 | 3  | 148847273 | HPS3                                                | 0.0158378  | 0.77101330968801    | 0.0585466095117296 |
| cg18614025 | 7  | 8008335   | GLCC1                                               | 0.00539701 | 0.550174032587653   | 0.0585466095117296 |
| cg23052020 | 6  | 106960170 | AIM1;AIM1                                           | 0.00848893 | 0.613042783675979   | 0.0585466095117296 |
| cg24289912 | 10 | 129845739 | PTPRE;PTPRE                                         | 0.00929646 | 0.54145860058691    | 0.0585466095117296 |
| cg27487046 | 1  | 860613    | SAMD11                                              | 0.00627432 | 0.569496353907217   | 0.0590698588315815 |
| cg02775882 | 14 | 103210570 |                                                     | -0.0635624 | -0.109015558470477  | 0.0590698588315815 |
| cg23887623 | 15 | 91516823  | PRC1;PRC1;PRC1                                      | -0.0208621 | -0.0312216941908148 | 0.0590698588315815 |
| cg00094875 | 19 | 52597141  | ZNF841                                              | -0.0709819 | -0.13849933196035   | 0.0590698588315815 |
| cg24962528 | 5  | 177042842 |                                                     | -0.031059  | -0.0474615882526214 | 0.0590698588315815 |
| cg03778373 | 5  | 37378360  | WDR70                                               | -0.0574808 | -0.0958585810082764 | 0.0590698588315815 |
| cg11517950 | 20 | 42417382  |                                                     | -0.102964  | -0.196851709235779  | 0.0590698588315815 |
| cg09902272 | 22 | 41312942  | XPNPEP3                                             | -0.0740474 | -0.127042959490653  | 0.0590698588315815 |
| cg21875532 | 6  | 42109999  | C6orf132                                            | 0.0277932  | 0.535112907324578   | 0.0590698588315815 |
| cg19991512 | 15 | 44250851  | FRMD5                                               | -0.0761428 | -0.202358134506238  | 0.0590698588315815 |
| cg21883042 | 12 | 62997433  | C12orf61;MIRLET71                                   | 0.00793136 | 0.593537973673215   | 0.0590698588315815 |
| cg24080119 | 19 | 45644694  |                                                     | 0.0118379  | 0.0179166767240935  | 0.0590736506874234 |
| cg15541743 | 4  | 3226527   | HTT                                                 | 0.00692507 | 0.010262902684241   | 0.0590736506874234 |
| cg06215939 | 16 | 1755402   | MAPK8IP3;MAPK8IP3                                   | 0.0653356  | 0.498130948193865   | 0.0590736506874234 |
| cg12290615 | 6  | 71419788  | SMAP1;SMAP1;SMAP1;SMAP1                             | -0.171948  | -0.419744913077603  | 0.0590736506874234 |
| cg25104555 | 10 | 16562998  | C1QL3                                               | 0.0166443  | 0.84325669751052    | 0.0590736506874234 |
| cg20113500 | 12 | 113773013 | SLC24A6                                             | 0.0198791  | 0.49012150147729    | 0.0590736506874234 |
| cg27619817 | 20 | 46832141  |                                                     | -0.0569653 | -0.102916136260171  | 0.0590736506874234 |
| cg24602243 | 5  | 14144425  | TRIO                                                | 0.0227782  | 0.7659854812917     | 0.0590736506874234 |
| cg10206070 | 11 | 67791338  | ALDH3B1;ALDH3B1;ALDH3B1;ALDH3B1                     | -0.0646408 | -0.116679797155084  | 0.0590736506874234 |
| cg18961533 | 19 | 19302816  | RFXANK;RFXANK;RFXANK;RFXANK;MEF2B;MEF2B;MEF2B;MEF2B | 0.0371958  | 0.467407161681932   | 0.0590736506874234 |
| cg08739385 | 1  | 38201818  | EPHA10                                              | -0.101834  | -0.18679233281253   | 0.0590736506874234 |
| cg15789385 | 12 | 121907156 | KDM2B;KDM2B                                         | -0.099559  | -0.214913651940593  | 0.0590736506874234 |
| cg25720688 | 7  | 129295884 | NRF1;NRF1;NRF1;NRF1                                 | -0.0680516 | -0.158306536178189  | 0.0592064708780651 |
| cg08941355 | 7  | 27133106  | HOXA1;HOXA1                                         | -0.0848774 | -0.17678297880615   | 0.0592064708780651 |
| cg16136840 | 5  | 95997740  | CAST;CAST;CAST;CAST                                 | 0.0370151  | 0.737971614156598   | 0.0592064708780651 |
| cg04139300 | 20 | 40247070  | CHD6;CHD6                                           | 0.0202726  | 0.786132542205494   | 0.0592064708780651 |
| cg00402311 | 8  | 62282815  | CLVS1                                               | -0.140382  | -0.279606653920519  | 0.0592064708780651 |
| cg12800150 | 6  | 34218964  | C6orf1;C6orf1;C6orf1                                | 0.00855134 | 0.380341481219333   | 0.0592064708780651 |
| cg16947339 | 16 | 30546198  | ZNF747;ZNF747;ZNF747;ZNF747;ZNF747;ZNF747           | 0.0711946  | 1.49085637289442    | 0.0592064708780651 |

|            |    |           |                                           |             |                     |                    |
|------------|----|-----------|-------------------------------------------|-------------|---------------------|--------------------|
| cg25617568 | 6  | 42277458  | TRERF1;TRERF1                             | -0.0456295  | -0.0799727490616643 | 0.0592064708780651 |
| cg26353328 | 8  | 42010408  | AP3M2;AP3M2                               | 0.0146824   | 0.762366115140259   | 0.0592064708780651 |
| cg09357979 | 4  | 25915643  | C4orf52                                   | 0.029024    | 0.649940184091031   | 0.0592064708780651 |
| cg22855052 | 12 | 6982535   | SPSB2;SPSB2                               | 0.0347824   | 0.51818059133792    | 0.0592064708780651 |
| cg02635865 | 20 | 56885090  | RAB22A;PPP4R1L                            | 0.0417628   | 1.03762530406868    | 0.0592064708780651 |
| cg05016940 | 14 | 53242413  | GNPNAT1                                   | -0.0643016  | -0.107259369123023  | 0.0592064708780651 |
| cg06818627 | 12 | 109536430 | UNG;UNG                                   | 0.00936084  | 0.574606904226052   | 0.0592064708780651 |
| cg20840778 | 17 | 79842807  |                                           | -0.0468573  | -0.0789396033678405 | 0.0592064708780651 |
| cg02060566 | 1  | 93913524  | FNBP1L;FNBP1L;FNBP1L                      | 0.0110081   | 0.474923858775655   | 0.0592064708780651 |
| cg16870607 | 2  | 219246302 | SLC11A1                                   | -0.0782657  | -0.167790493780942  | 0.0592064708780651 |
| cg07463138 | 15 | 83478369  | WHAMM                                     | 0.00921612  | 0.598179451837082   | 0.0592064708780651 |
| cg04373646 | 9  | 37484887  | POLR1E;POLR1E                             | -0.0416564  | -0.0672721129340991 | 0.05945973035251   |
| cg15128638 | 3  | 124493484 | ITGB5                                     | -0.0692351  | -0.125840480071182  | 0.05945973035251   |
| cg00656411 | 7  | 140773422 |                                           | 0.0363735   | 0.924423836350291   | 0.05945973035251   |
| cg18571419 | 4  | 187026278 |                                           | 0.0138643   | 0.353377627791481   | 0.05945973035251   |
| cg20710049 | 10 | 22875490  | PIP4K2A                                   | -0.0592663  | -0.0971172410829588 | 0.0597624091056663 |
| cg19409381 | 4  | 83351505  | HNRPDL;ENOPH1;HNRPDL                      | 0.011771    | 0.615554395208228   | 0.0597624091056663 |
| cg12659851 | 15 | 51988940  | SCG3;SCG3                                 | -0.091969   | -0.189399114421771  | 0.0597624091056663 |
| cg24025893 | 10 | 134756164 | C10orf93                                  | 0.0488721   | 0.371463551267324   | 0.0597624091056663 |
| cg20036711 | 13 | 21622707  | LATS2                                     | -0.0446717  | -0.0718860626233614 | 0.0597624091056663 |
| cg16316472 | 4  | 77997182  | CCNI                                      | 0.0571518   | 0.897079791814894   | 0.0597624091056663 |
| cg08823305 | 20 | 3451391   | ATRN;ATRN;ATRN                            | 0.0151967   | 0.708973312628139   | 0.0597624091056663 |
| cg13320890 | 6  | 131186742 | EPB41L2;EPB41L2;EPB41L2;EPB41L2;EPB41L2   | -0.00785123 | -0.0116873729796305 | 0.0598677893691087 |
| cg15482976 | 2  | 174828973 | SP3;SP3;SP3                               | 0.0449751   | 0.509539288894447   | 0.0602094701420674 |
| cg25927259 | 18 | 59857553  | KIAA1468                                  | -0.0459493  | -0.0812055842355996 | 0.0604118995132999 |
| cg00789416 | 14 | 101404296 | SNORD113-5                                | -0.0192645  | -0.0295144210910498 | 0.0606380399775694 |
| cg10442442 | 2  | 127792200 |                                           | -0.0362008  | -0.0620044536578241 | 0.0606380399775694 |
| cg04356926 | 3  | 98241413  | CLDND1;CLDND1;CLDND1;CLDND1;CLDND1;CLDND1 | 0.0105104   | 0.679162522756574   | 0.0607265780570152 |
| cg21597684 | 2  | 197457400 | HECW2                                     | 0.0243919   | 0.79284259323085    | 0.0607265780570152 |
| cg15440854 | 11 | 115041104 |                                           | 0.00265046  | 0.231611204633289   | 0.0607265780570152 |
| cg11575295 | 7  | 158250911 | PTPRN2;PTPRN2;PTPRN2                      | 0.0801688   | 0.728764699360552   | 0.0607265780570152 |
| cg15331792 | 1  | 45396742  | EIF2B3;EIF2B3;EIF2B3                      | -0.0648126  | -0.111570200727944  | 0.0607265780570152 |
| cg04049141 | 16 | 20821573  | LOC81691;LOC81691                         | -0.0389442  | -0.0648518808757196 | 0.0607265780570152 |
| cg21942282 | 11 | 64868530  | VPS51;VPS51                               | -0.114124   | -0.251769124809461  | 0.0607265780570152 |
| cg00449068 | 6  | 107403532 | BEND3                                     | -0.073657   | -0.134394509399797  | 0.0607265780570152 |
| cg16754853 | 15 | 52868720  |                                           | -0.0948652  | -0.189807231410676  | 0.0607265780570152 |
| cg16415939 | 1  | 236083208 |                                           | -0.069      | -0.160615695481897  | 0.0607265780570152 |
| cg04815242 | 22 | 45330752  | PHF21B;PHF21B                             | 0.0101871   | 0.0152886263144311  | 0.0607265780570152 |
| cg13272676 | 11 | 9404868   | IPO7                                      | -0.0806449  | -0.142829700962754  | 0.0607265780570152 |
| cg18406718 | 4  | 102269374 | PPP3CA;PPP3CA;PPP3CA                      | 0.0103213   | 0.583950074679615   | 0.0607265780570152 |
| cg21380365 | 6  | 27865980  |                                           | -0.0378429  | -0.064300493177377  | 0.0607265780570152 |
| cg20509869 | 2  | 220375605 |                                           | 0.0992099   | 0.9307915135266     | 0.0607265780570152 |
| cg02006147 | 2  | 74734710  | PCGF1                                     | 0.017485    | 0.875250926425979   | 0.0607265780570152 |
| cg00986191 | 5  | 178419655 | GRM6                                      | -0.0383762  | -0.0602786156597933 | 0.060827577018538  |
| cg24247472 | 17 | 46908838  | CALCOCO2                                  | 0.0275907   | 0.806705685160305   | 0.060827577018538  |
| cg20450471 | 6  | 28584061  |                                           | 0.052707    | 0.476323735195727   | 0.060827577018538  |
| cg02662491 | 3  | 165574116 |                                           | -0.0460616  | -0.0756247868068144 | 0.0614273661093166 |
| cg19943799 | 20 | 40222546  | CHD6                                      | -0.0648263  | -0.105771831693132  | 0.0614273661093166 |
| cg17643023 | 18 | 55833162  | NEDD4L;NEDD4L;NEDD4L;NEDD4L;NEDD4L;NEDD4L | -0.0531524  | -0.0939594274240381 | 0.0614273661093166 |
| cg22983329 | 22 | 48721504  |                                           | -0.0911419  | -0.175034382417776  | 0.0614273661093166 |
| cg23561934 | 2  | 121199920 |                                           | 0.0292857   | 0.536942107603484   | 0.0614273661093166 |
| cg09431544 | 19 | 14629187  | DNAJB1;DNAJB1                             | 0.0499302   | 0.342320746571312   | 0.0614273661093166 |
| cg07765536 | 15 | 95647020  |                                           | -0.104571   | -0.325963720438853  | 0.0615371723654592 |
| cg04529860 | 19 | 39900650  |                                           | 0.00772321  | 0.681721934718533   | 0.0615371723654592 |
| cg07264679 | 12 | 7657396   | CD163;CD163                               | -0.011904   | -0.0176257216733763 | 0.0615371723654592 |
| cg14540546 | 19 | 35738122  | LSR;LSR;LSR;LSR;LSR                       | -0.0620919  | -0.108522682916358  | 0.0615371723654592 |
| cg22185536 | 3  | 40518595  | ZNF619;ZNF619;ZNF619;ZNF619;ZNF619;ZNF619 | 0.0229823   | 0.605612492571369   | 0.0615371723654592 |
| cg07090025 | 1  | 1510437   | SSU72                                     | 0.017242    | 0.632690546647694   | 0.0615371723654592 |
| cg21959890 | 10 | 94068044  | MARCH5                                    | -0.0611376  | -0.105918098320094  | 0.0615371723654592 |
| cg07697561 | 5  | 140998635 | DIAPH1;DIAPH1                             | 0.0224325   | 0.677662331460088   | 0.0615418159917198 |
| cg24809299 | 20 | 23331479  | NXT1;NXT1                                 | 0.015735    | 0.759195675991474   | 0.0615805888647651 |
| cg23279878 | 1  | 43464711  |                                           | -0.0732938  | -0.119419630209819  | 0.0615805888647651 |
| cg04330631 | 6  | 42018203  | TAF8                                      | 0.0382713   | 0.731293710442021   | 0.0615805888647651 |
| cg09189978 | 22 | 38240632  | ANKRD54;MIR658                            | 0.0477546   | 0.316745658965131   | 0.0615805888647651 |
| cg17155610 | 1  | 150382400 | RPRD2                                     | -0.0664483  | -0.155793507118404  | 0.0615805888647651 |
| cg25305397 | 19 | 13816206  |                                           | -0.0271587  | -0.0427722831365354 | 0.0615805888647651 |
| cg18834652 | 11 | 94276072  | FUT4                                      | -0.0410101  | -0.0778705467207683 | 0.0615805888647651 |
| cg20054983 | 11 | 124496314 | TBRG1;TBRG1                               | 0.00420474  | 0.00624974413311849 | 0.0615805888647651 |
| cg03835313 | 7  | 27137427  | HOTAIRM1;HOTAIRM1                         | -0.0828359  | -0.193065046941273  | 0.0615805888647651 |
| cg25621735 | 2  | 230933934 | SLC16A14                                  | -0.070467   | -0.135780397983663  | 0.0615805888647651 |
| cg07163173 | 2  | 67624373  | ETAA1                                     | 0.0218845   | 0.844238503428439   | 0.0615805888647651 |
| cg26743529 | 10 | 29134817  | C10orf126                                 | -0.09138    | -0.194981973751015  | 0.0615805888647651 |
| cg23217542 | 15 | 65958740  | DENND4A;DENND4A                           | -0.0724072  | -0.13975208364853   | 0.0615805888647651 |
| cg14294444 | 9  | 128003255 | HSPA5                                     | 0.00258769  | 0.316150650228386   | 0.0615805888647651 |
| cg18572609 | 3  | 136150391 | STAG1                                     | -0.0361366  | -0.0577354687186095 | 0.0615805888647651 |
| cg02400449 | 22 | 38857584  |                                           | 0.00913851  | 0.51913276573753    | 0.0615805888647651 |
| cg03969724 | 1  | 6114997   | KCNAB2;KCNAB2                             | -0.105223   | -0.223452703936744  | 0.0615805888647651 |
| cg00385596 | 11 | 76088726  | PRKRIR                                    | -0.012873   | -0.0192169641794712 | 0.0615805888647651 |
| cg06869501 | 19 | 21541044  | ZNF738                                    | -0.0456296  | -0.0856101686697788 | 0.0615805888647651 |
| cg15160573 | 1  | 28908642  | SNORA16A;SNHG12                           | 0.0141655   | 0.546277230644772   | 0.0615805888647651 |
| cg03355286 | 12 | 20962423  | SLC01B3                                   | -0.102645   | -0.240502047597891  | 0.0615805888647651 |
| cg01626918 | 12 | 75978785  |                                           | -0.0541841  | -0.094112690154776  | 0.0615805888647651 |

|                |    |           |                                                         |             |                      |                    |
|----------------|----|-----------|---------------------------------------------------------|-------------|----------------------|--------------------|
| cg07835289     | 1  | 236030215 | LYST;LYST                                               | 0.0254648   | 0.494377554501753    | 0.0615805888647651 |
| cg06339248     | 11 | 57435803  | ZDHH5                                                   | 0.0321551   | 1.07049594376483     | 0.0618218480558689 |
| cg14550101     | 1  | 155247361 | HCN3                                                    | 0.006041    | 0.473896035793199    | 0.0622827562307827 |
| cg06183295     | 3  | 108855390 |                                                         | -0.0773594  | -0.155931999803372   | 0.0622827562307827 |
| cg15662608     | 15 | 88247247  |                                                         | -0.0925302  | -0.16914784585083    | 0.0623363912408582 |
| cg19197830     | 2  | 170681574 | METTL5                                                  | 0.0174719   | 0.470928764297447    | 0.0623363912408582 |
| cg16578267     | 1  | 937048    | HES4;HES4                                               | 0.0203597   | 0.427381230628676    | 0.0623363912408582 |
| cg14336526     | 11 | 30367246  |                                                         | -0.0472233  | -0.0771379867816901  | 0.0623363912408582 |
| cg02463478     | 16 | 30798048  | ZNF629                                                  | 0.00895012  | 0.515955851552336    | 0.0623363912408582 |
| cg02761778     | 16 | 69643871  | NFAT5;NFAT5;NFAT5;NFAT5                                 | -0.0697791  | -0.132105086937518   | 0.0623363912408582 |
| cg23171573     | 15 | 41099257  | ZFYVE19;DNAJC17                                         | 0.0316871   | 0.555342526545468    | 0.0623363912408582 |
| cg09704553     | 12 | 27167052  | TM7SF3                                                  | 0.0427366   | 1.02636735118041     | 0.0623363912408582 |
| cg09414262     | 22 | 19594239  |                                                         | -0.0700842  | -0.122094624906562   | 0.0623363912408582 |
| cg18330222     | 15 | 100831929 | ADAMTS17                                                | -0.0660202  | -0.122121861524955   | 0.0623363912408582 |
| cg05249419     | 15 | 78855388  |                                                         | -0.0652454  | -0.11735162974594    | 0.0623363912408582 |
| cg25380713     | 14 | 69927647  | SLC39A9;SLC39A9;SLC39A9;SLC39A9;SLC39A9                 | -0.0242119  | -0.03704744632317422 | 0.0623363912408582 |
| cg15619333     | 12 | 133759653 | ZNF268;ZNF268;ZNF268;ZNF268;ZNF268;ZNF268;ZNF268;ZNF268 | -0.113064   | -0.202075581886034   | 0.0623363912408582 |
| cg00250391     | 11 | 93850000  |                                                         | -0.0487262  | -0.0844331726692717  | 0.0623363912408582 |
| cg16117070     | 2  | 20547854  |                                                         | -0.0580299  | -0.135170718642343   | 0.0623363912408582 |
| cg20878463     | 15 | 58358758  | ALDH1A2;ALDH1A2;ALDH1A2                                 | 0.0391605   | 0.557022757666626    | 0.0623363912408582 |
| cg03053914     | 1  | 173837504 | SNORD75;SNORD74;GAS5;ZBTB37;ZBTB37;ZBTB37;ZBTB37        | 0.0531258   | 0.718292162084865    | 0.0623363912408582 |
| cg17615565     | 11 | 11454265  | GALNT18                                                 | 0.00398016  | 0.00582609562810245  | 0.0623363912408582 |
| cg17217228     | 14 | 63203565  | KCNH5;KCNH5                                             | -0.0748201  | -0.166719586734686   | 0.0623363912408582 |
| cg12126869     | 10 | 346505    | DIP2C                                                   | -0.0427008  | -0.068334971945728   | 0.0623363912408582 |
| cg17390355     | 22 | 30228436  | ASCC2;ASCC2                                             | -0.0239137  | -0.0366581283759943  | 0.0623363912408582 |
| cg2328353      | 9  | 35605358  | TESK1;TESK1                                             | 0.0443949   | 0.516876448595069    | 0.0623363912408582 |
| ch.14.1499103R | 14 | 93412334  | ITPK1;ITPK1;ITPK1                                       | 0.0131298   | 1.00472394704947     | 0.0623363912408582 |
| cg00380172     | 6  | 148663585 | SASH1                                                   | 0.0196525   | 0.450047095322357    | 0.0623363912408582 |
| cg26258631     | 2  | 190648605 | PMS1;ORMDL1;ORMDL1;PMS1;PMS1                            | 0.00690641  | 0.516397307215803    | 0.0623363912408582 |
| cg19571034     | 11 | 125462736 | STT3A                                                   | 0.0204544   | 0.721853534293137    | 0.0623363912408582 |
| cg05075708     | 6  | 32940440  | BRD2;BRD2                                               | 0.00935526  | 0.670069922213361    | 0.0623363912408582 |
| cg01794932     | 1  | 1209696   | UBE2J2;UBE2J2;UBE2J2;UBE2J2                             | 0.0162833   | 0.83232888245868     | 0.0623363912408582 |
| cg17819963     | 10 | 135191943 | PAOX;PAOX;PAOX                                          | 0.0176928   | 0.529037838161361    | 0.062620306422343  |
| cg13109045     | 14 | 105218947 | SIVA1;SIVA1                                             | 0.0230246   | 0.925466337422788    | 0.0627142914522418 |
| cg05947505     | 10 | 102800464 | SFXN3                                                   | -0.0614374  | -0.113768066657757   | 0.0627142914522418 |
| cg06142946     | 11 | 17373124  | DKFZp686O24166                                          | 0.0030447   | 0.310066616245669    | 0.0627142914522418 |
| cg18281016     | 19 | 58790371  | ZNF8;ZNF8                                               | 0.0237097   | 0.508437581725871    | 0.0627142914522418 |
| cg05065230     | 3  | 49395807  | GPX1;GPX1                                               | 0.0117197   | 0.650534173882929    | 0.0627142914522418 |
| cg09706833     | 21 | 46824938  | COL18A1                                                 | 0.0441286   | 0.302312610626543    | 0.0627142914522418 |
| cg11865519     | 15 | 101163830 | ASB7;ASB7                                               | -0.0265727  | -0.0422017769457813  | 0.0627142914522418 |
| cg08989903     | 1  | 24952794  |                                                         | -0.104994   | -0.206386468371954   | 0.0627142914522418 |
| cg20280386     | 10 | 99080417  | FRAT1;FRAT1                                             | 0.021886    | 0.870816129646476    | 0.0627142914522418 |
| cg12639796     | 1  | 32479246  | KHDRBS1;KHDRBS1;KHDRBS1;KHDRBS1                         | 0.0139864   | 1.40283964725664     | 0.0627142914522418 |
| cg00603717     | 13 | 46039090  | COG3;COG3                                               | 0.0292975   | 0.579886927891005    | 0.0627142914522418 |
| cg11359770     | 2  | 26304137  | RAB10                                                   | -0.0735431  | -0.129190663649272   | 0.0628258293549384 |
| cg02474542     | 11 | 72300891  | PDE2A;PDE2A;PDE2A;PDE2A                                 | 0.008757    | 0.45754144812571     | 0.0629014080171654 |
| cg19742870     | 9  | 71860887  | TJP2;TJP2;TJP2;TJP2;TJP2;TJP2                           | -0.0857317  | -0.15135920849825    | 0.0629014080171654 |
| cg16201674     | 13 | 95364586  | SOX21                                                   | 0.0403307   | 0.548720854448031    | 0.0629014080171654 |
| cg18457685     | 6  | 29760659  | HCG4                                                    | 0.0390255   | 0.976994982838922    | 0.0629014080171654 |
| cg01879257     | 20 | 40513291  |                                                         | -0.0268267  | -0.0409841035497993  | 0.0629014080171654 |
| cg05804856     | 10 | 127715083 | ADAM12;ADAM12                                           | -0.0816788  | -0.202533901620495   | 0.0629014080171654 |
| cg13192053     | 8  | 60062434  |                                                         | -0.136257   | -0.367375421274855   | 0.0629014080171654 |
| cg12090014     | 1  | 182462043 | RGSL1                                                   | 0.0274402   | 0.0434373481496855   | 0.0629014080171654 |
| cg23053573     | 1  | 26662567  | AIM1L                                                   | 0.00761081  | 0.337838405883455    | 0.0629014080171654 |
| cg03216991     | 17 | 2415620   | METT10D                                                 | 0.0701359   | 0.272857633244329    | 0.0629014080171654 |
| cg23415810     | 12 | 53920129  | ATF7;ATF7;ATF7                                          | -0.0772261  | -0.129877449510882   | 0.0629014080171654 |
| cg03363567     | 17 | 57642929  | DHX40;DHX40;DHX40;DHX40                                 | -0.00178017 | -0.33543368966639    | 0.0629014080171654 |
| cg05348421     | 17 | 1359962   | CRK;CRK                                                 | 0.0838292   | 0.484686515224238    | 0.0629160702151938 |
| cg19889264     | 15 | 75018700  | CYP1A1                                                  | 0.0266173   | 0.576009779255354    | 0.0629160702151938 |
| cg03537567     | 4  | 25375829  |                                                         | -0.0716623  | -0.136608829718778   | 0.0629160702151938 |
| cg06318239     | 2  | 234921750 | TRPM8                                                   | -0.0148427  | -0.0221963936969107  | 0.0629160702151938 |
| cg00279778     | 22 | 45102452  | PRR5;PRR5;PRR5;PRR5-ARHGAP8;PRR5;PRR5                   | -0.0672269  | -0.140961945688283   | 0.0629160702151938 |
| cg15701794     | 10 | 77156421  |                                                         | 0.0213439   | 0.536986648997934    | 0.0629160702151938 |
| cg06674436     | 5  | 1278864   | TERT;TERT                                               | 0.00172153  | 0.00250492027090461  | 0.0633352380262148 |
| cg05587970     | 11 | 61187174  | CPSF7;CPSF7;CPSF7                                       | -0.0690431  | -0.124864169918003   | 0.0637961556823956 |
| cg09507567     | 10 | 124027408 |                                                         | -0.0711497  | -0.180372421226922   | 0.0637961556823956 |
| cg05082095     | 1  | 155099843 | EFNA1;EFNA1                                             | 0.026794    | 0.7460762723568      | 0.0637961556823956 |
| cg08035151     | 6  | 31772251  | 2,00 LSM                                                | -0.064149   | -0.105479164502134   | 0.0637961556823956 |
| cg09125080     | 5  | 71687192  |                                                         | -0.05139    | -0.0852100695082129  | 0.0637961556823956 |
| cg21215416     | 11 | 77532152  | AAMDC;RSF1                                              | 0.0220654   | 0.659151956413864    | 0.0637961556823956 |
| cg17357614     | 10 | 26965487  |                                                         | -0.0442607  | -0.071754973240842   | 0.0637961556823956 |
| cg04120002     | 20 | 51712963  | TSHZ2                                                   | -0.0994753  | -0.191898082205134   | 0.0637961556823956 |
| cg01609171     | 16 | 127997    | MPG;MPG;MPG                                             | 0.00904743  | 0.622360647962198    | 0.0637961556823956 |
| cg08270825     | 9  | 125561317 | OR1K1                                                   | -0.117115   | -0.264893309038985   | 0.0637961556823956 |
| cg20573956     | 1  | 112957882 | BOC;BOC;BOC                                             | -0.0808567  | -0.157603228557427   | 0.0637961556823956 |
| cg07855129     | 1  | 90287374  | LRRRC8;LRRRC8                                           | 0.017677    | 0.421986461379683    | 0.0637961556823956 |
| cg08452838     | 10 | 34451339  | PARD3;PARD3;PARD3;PARD3;PARD3;PARD3;PARD3;PARD3         | -0.038357   | -0.0640829631844589  | 0.0637961556823956 |
| cg17795164     | 2  | 153032738 | STAM2                                                   | 0.00704447  | 0.507205506669514    | 0.0637961556823956 |
| cg19730147     | 8  | 124253706 | C8orf76                                                 | 0.0184468   | 0.545908073181726    | 0.0637961556823956 |
| cg22851420     | 1  | 40149650  | HPCAL4                                                  | 0.0500983   | 0.673074516423237    | 0.0637961556823956 |
| cg04233747     | 5  | 145214971 | PRELID2;PRELID2;PRELID2                                 | 0.0348826   | 0.748688605080674    | 0.0637961556823956 |
| cg11638071     | 17 | 56405967  | BZRAP1;BZRAP1;BZRAP1;BZRAP1                             | 0.0066043   | 0.444020224669512    | 0.0637961556823956 |



|            |    |           |                                                         |            |                      |                    |
|------------|----|-----------|---------------------------------------------------------|------------|----------------------|--------------------|
| cg07616922 | 11 | 34049237  |                                                         | -0.0240793 | -0.0369175763994513  | 0.0638198881746216 |
| cg20774490 | 9  | 132565255 | TOR1B                                                   | 0.0261634  | 0.660631881947593    | 0.0638198881746216 |
| cg21547976 | 19 | 1206451   | STK11;STK11                                             | 0.0156429  | 0.784196317488346    | 0.0638198881746216 |
| cg03590216 | 20 | 5931285   | MCM8;MCM8;TRMT6                                         | 0.0220232  | 0.568961010098438    | 0.0638198881746216 |
| cg07370464 | 17 | 43394456  | MAP3K14                                                 | 0.0313162  | 0.53398434761725     | 0.0638198881746216 |
| cg01643110 | 3  | 47619726  | CSPG5;CSPG5;CSPG5;CSPG5;CSPG5                           | 0.013995   | 0.528559188398338    | 0.0638198881746216 |
| cg25540078 | 4  | 144102007 |                                                         | -0.0628506 | -0.121186448802502   | 0.0638198881746216 |
| cg15332162 | 1  | 224370698 | DEGS1                                                   | 0.041956   | 0.814264324343054    | 0.0638198881746216 |
| cg27346562 | 17 | 46166752  | CBX1;CBX1                                               | -0.0264477 | -0.04094396888782    | 0.0638198881746216 |
| cg13765002 | 6  | 144385134 | PLAGL1;PLAGL1;PLAGL1;PLAGL1;PLAGL1;PLAGL1;PLAGL1;PLAGL1 | 0.0111133  | 0.746521041381334    | 0.0638198881746216 |
| cg12032191 | 1  | 46152434  | TMEM69;GPBP1L1                                          | 0.0081279  | 0.551394224156435    | 0.0638198881746216 |
| cg08207256 | 19 | 10828848  | DNM2;DNM2;DNM2;DNM2;DNM2;DNM2;DNM2;DNM2;MIR638;DNM2     | 0.0278363  | 0.523450565158612    | 0.0638198881746216 |
| cg13812249 | 9  | 71999962  | FAM189A2;FAM189A2                                       | -0.0761952 | -0.171135172425229   | 0.0638198881746216 |
| cg24082320 | 19 | 2328980   | SPPL2B;SPPL2B;LSM7                                      | 0.0101392  | 0.429478684759344    | 0.0638198881746216 |
| cg17588904 | 1  | 114493165 | HIPK1;HIPK1;HIPK1                                       | -0.130798  | -0.287251078744532   | 0.0638198881746216 |
| cg25022687 | 10 | 118032987 | GFRA1;GFRA1;GFRA1;GFRA1                                 | 0.0105673  | 0.460248673509923    | 0.0638198881746216 |
| cg22850304 | 1  | 39325639  | RRAGC                                                   | 0.01111    | 0.62976248056508     | 0.0638198881746216 |
| cg11562147 | 6  | 36303570  | C6orf222                                                | -0.0273782 | -0.0443737197563988  | 0.0638198881746216 |
| cg15346191 | 2  | 242743588 | GAL3ST2                                                 | 0.028339   | 0.866763263628455    | 0.0638198881746216 |
| cg04371440 | 12 | 112819495 |                                                         | 0.00842127 | 0.535377513230685    | 0.0638198881746216 |
| cg04921619 | 12 | 7000534   |                                                         | 0.0118504  | 0.460782441530269    | 0.0638198881746216 |
| cg18264753 | 6  | 138188625 | TNFAIP3;TNFAIP3                                         | 0.0201452  | 0.800150303503658    | 0.0638198881746216 |
| cg04253876 | 2  | 30453758  | LBH                                                     | 0.025793   | 0.670122789077451    | 0.0638198881746216 |
| cg06837242 | 1  | 19578761  | MRTO4;KIAA0090                                          | 0.0307467  | 0.7411952275720288   | 0.0638198881746216 |
| cg22361604 | 1  | 61435148  |                                                         | -0.0756368 | -0.141450013624474   | 0.0638198881746216 |
| cg27485605 | 12 | 96430600  | LTA4H;LTA4H;LTA4H                                       | -0.0980579 | -0.21218642806632    | 0.0638198881746216 |
| cg12055421 | 2  | 74685521  | WBP1                                                    | 0.00397289 | 0.365814775785985    | 0.0638198881746216 |
| cg20725035 | 3  | 148709344 | GYG1                                                    | 0.054214   | 0.608839905086403    | 0.0638198881746216 |
| cg13599271 | 3  | 58291905  | RPP14;RPP14                                             | 0.0299244  | 0.663075202016128    | 0.0638198881746216 |
| cg14939446 | 16 | 2571015   | AMDHD2;AMDHD2                                           | 0.00644167 | 0.487185528240149    | 0.0638198881746216 |
| cg02892271 | 8  | 42120927  | LOC101929897                                            | -0.0131247 | -0.0196934478763763  | 0.0638198881746216 |
| cg14212045 | 5  | 142179386 | ARHGAP26;ARHGAP26                                       | -0.0599093 | -0.103425554179631   | 0.0638198881746216 |
| cg20326786 | 1  | 176912031 | ASTN1;ASTN1                                             | -0.10888   | -0.250576004039036   | 0.0638198881746216 |
| cg26320000 | 2  | 129902340 |                                                         | -0.0562036 | -0.0931939328403634  | 0.0638198881746216 |
| cg03980304 | 16 | 27325000  | IL4R;IL4R                                               | 0.00835801 | 0.593882029317171    | 0.0638198881746216 |
| cg24860356 | 20 | 33624140  | TRPC4AP;TRPC4AP                                         | -0.0637421 | -0.111949100854468   | 0.0638198881746216 |
| cg02254698 | 7  | 87508528  | DBF4                                                    | -0.0580303 | -0.0924538911038442  | 0.0638198881746216 |
| cg14665812 | 5  | 170880235 | FGF18                                                   | -0.0243247 | -0.0392281803142874  | 0.0638198881746216 |
| cg14559709 | 1  | 234785604 | LOC101927787                                            | -0.0500188 | -0.078852237786281   | 0.0638198881746216 |
| cg18374625 | 19 | 50004152  | MIR150                                                  | 0.0169717  | 0.502447375734477    | 0.0638198881746216 |
| cg06194885 | 3  | 138150379 |                                                         | -0.0646466 | -0.112536282112282   | 0.0638198881746216 |
| cg08314795 | 20 | 42450922  |                                                         | -0.0758583 | -0.138081153906915   | 0.0638486631192083 |
| cg24078554 | 1  | 120182239 | ZNF697                                                  | -0.0617158 | -0.109803842766001   | 0.0638486631192083 |
| cg05719672 | 15 | 91446576  | MAN2A2                                                  | 0.0253343  | 0.734221691123991    | 0.0640482042019922 |
| cg00113951 | 12 | 121078090 | CABP1                                                   | 0.00892935 | 0.33861777053317     | 0.0641166877450315 |
| cg05890550 | 17 | 2699706   | RAP1GAP2;RAP1GAP2                                       | 0.00999376 | 0.664322518307905    | 0.0641203665745313 |
| cg13950603 | 19 | 7795619   | CLEC4G                                                  | 0.019434   | 0.453922884789687    | 0.0642851491443453 |
| cg20947164 | 10 | 124105011 |                                                         | -0.0198983 | -0.029914288114485   | 0.0645256869037719 |
| cg21341492 | 1  | 9836431   | CLSTN1;CLSTN1;CLSTN1                                    | -0.0905523 | -0.18078546915667    | 0.0646954670925009 |
| cg16438841 | 12 | 132149724 |                                                         | -0.0271332 | -0.0409579277479921  | 0.0648343760594094 |
| cg00673963 | 1  | 100731856 | RTCD1;RTCD1;RTCD1;RTCD1                                 | 0.00644696 | 0.443979869694123    | 0.0648343760594094 |
| cg07636362 | 8  | 79717261  | IL7;IL7                                                 | 0.0125302  | 0.610083861494778    | 0.0648343760594094 |
| cg08517455 | 2  | 99439997  | C2orf55                                                 | -0.0192496 | -0.0297580869171712  | 0.0648343760594094 |
| cg25867545 | 3  | 182880776 | LAMP3                                                   | 0.0424769  | 0.455634103906536    | 0.0648343760594094 |
| cg08531746 | 13 | 113512905 | ATP11A;ATP11A                                           | -0.0487321 | -0.0778102944545666  | 0.0648343760594094 |
| cg11732949 | 10 | 7993238   | TAF3                                                    | -0.0639877 | -0.106434900839473   | 0.0648343760594094 |
| cg07233389 | 9  | 112085534 |                                                         | -0.0601974 | -0.101951486072205   | 0.0648343760594094 |
| cg10059324 | 1  | 7884824   | PER3                                                    | -0.0697186 | -0.138390304825217   | 0.0648343760594094 |
| cg13872879 | 19 | 51071324  | LRRC4B                                                  | 0.0253191  | 0.642048703415259    | 0.0648343760594094 |
| cg14049549 | 12 | 132156010 |                                                         | -0.0670614 | -0.118922055498333   | 0.0648343760594094 |
| cg06984528 | 2  | 82062958  |                                                         | -0.0818923 | -0.16151215200971    | 0.0648343760594094 |
| cg02063360 | 14 | 105452560 | C14orf79                                                | 0.0166429  | 0.495192704775618    | 0.0648343760594094 |
| cg27568321 | 4  | 113152709 | AP1AR;AP1AR                                             | 0.0315105  | 0.938460101734212    | 0.0648343760594094 |
| cg14925091 | 13 | 113721521 | MCF2L;MCF2L                                             | -0.0497991 | -0.0907748527860833  | 0.0648343760594094 |
| cg23016347 | 10 | 75170966  | ANXA7;ANXA7                                             | -0.0572879 | -0.116297149076041   | 0.0648343760594094 |
| cg07500799 | 7  | 127650747 | SND1                                                    | 0.0142742  | 0.0218323750887338   | 0.0648343760594094 |
| cg17102910 | 7  | 1126249   | GPER;C7orf50;C7orf50;GPER;C7orf50;GPER                  | -0.0499642 | -0.110831642296786   | 0.0648343760594094 |
| cg01167366 | 10 | 12742170  | CAMK1D;CAMK1D                                           | -0.0349313 | -0.0551432246967248  | 0.0648343760594094 |
| cg16494260 | 14 | 55967277  |                                                         | -0.0335065 | -0.05312306119947757 | 0.0648343760594094 |
| cg12064008 | 1  | 32827730  | LOC100128071;LOC100128071;TSSK3                         | 0.0124122  | 0.836972608092615    | 0.0648343760594094 |
| cg01918066 | 20 | 43159964  | PKIG;PKIG;PKIG;PKIG                                     | -0.0611691 | -0.103382662917855   | 0.0648343760594094 |
| cg23300001 | 10 | 134628152 |                                                         | -0.0279493 | -0.0453242943940102  | 0.0648343760594094 |
| cg16693127 | 10 | 62493129  | ANK3;ANK3                                               | 0.0302836  | 0.642273627317725    | 0.0648343760594094 |
| cg10194899 | 6  | 43248849  | TTBK1                                                   | -0.116097  | -0.223700208901231   | 0.0648343760594094 |
| cg21647833 | 17 | 57184330  | TRIM37;TRIM37                                           | 0.00908776 | 0.623015208407843    | 0.0648343760594094 |
| cg12142685 | 10 | 12391596  | CAMK1D;CAMK1D;CAMK1D;CAMK1D                             | 0.0488211  | 0.341559374663839    | 0.0648343760594094 |
| cg21396456 | 3  | 43021214  | FAM198A                                                 | 0.0134607  | 0.461375266296268    | 0.0648343760594094 |
| cg18780740 | 6  | 80516964  | C6orf7                                                  | -0.0397678 | -0.0648091976386578  | 0.0651479690567066 |
| cg24467825 | 6  | 30302667  | TRIM39;TRIM39                                           | -0.0896621 | -0.175729408630665   | 0.0651577145239516 |
| cg01169772 | 5  | 41904236  | C5orf51                                                 | 0.00447064 | 0.355825617936927    | 0.0651577145239516 |
| cg00181527 | 9  | 135754163 | AK8;AK8;C9orf9                                          | 0.0140459  | 0.643102941836349    | 0.0651577145239516 |
| cg08101859 | 4  | 56280173  | TMEM165;TMEM165                                         | -0.0487716 | -0.0816889367005565  | 0.0651577145239516 |

|                 |    |           |                                                                 |            |                     |                    |
|-----------------|----|-----------|-----------------------------------------------------------------|------------|---------------------|--------------------|
| cg03770187      | 1  | 247979766 | OR14A16                                                         | -0.0698373 | -0.165570996884996  | 0.0651577145239516 |
| cg14264457      | 18 | 52679522  |                                                                 | -0.0550925 | -0.0927886757936148 | 0.0651577145239516 |
| cg04947856      | 2  | 239112553 | ILKAP                                                           | 0.00562793 | 0.48718065177299    | 0.0651577145239516 |
| cg21576095      | 17 | 72586279  | CD300LD;C17orf77;C17orf77                                       | -0.0966843 | -0.206797794983897  | 0.0651577145239516 |
| cg16174680      | 8  | 41504078  | NKX6-3                                                          | 0.00374581 | 0.350879218451131   | 0.0651577145239516 |
| cg19744051      | 5  | 55294284  |                                                                 | -0.0952469 | -0.185776889023513  | 0.0651577145239516 |
| cg04517323      | 8  | 98788873  | LAPTM4B                                                         | 0.0336988  | 0.494811858905731   | 0.0651577145239516 |
| cg17748061      | 4  | 11368007  |                                                                 | -0.0123674 | -0.0189120813142202 | 0.0651577145239516 |
| cg06002947      | 16 | 28936713  | RABEP2                                                          | 0.0256892  | 0.737068337710918   | 0.0651577145239516 |
| cg08649501      | 3  | 41997107  | ULK4                                                            | -0.0196755 | -0.0303475405577021 | 0.0651577145239516 |
| cg23702073      | 1  | 36621802  | MAP7D1;MAP7D1;MAP7D1;MAP7D1;MAP7D1;MAP7D1;TRAPP3                | 0.0390835  | 0.397833489777629   | 0.0651577145239516 |
| cg17480615      | 3  | 3137289   | IL5RA;IL5RA;IL5RA;IL5RA;IL5RA;IL5RA                             | -0.0325451 | -0.0511275196506931 | 0.0651577145239516 |
| cg16516670      | 8  | 71382800  | LOC101926892                                                    | -0.0754466 | -0.125278216078251  | 0.0651577145239516 |
| cg16162324      | 12 | 104852047 | CHST11                                                          | 0.00614505 | 0.439920938918579   | 0.0651577145239516 |
| cg07232475      | 15 | 44069664  | ELL3                                                            | 0.00610087 | 0.526711229533145   | 0.0652094004001671 |
| cg22486192      | 16 | 29848547  | MVP;MVP;MVP;MVP                                                 | -0.0785948 | -0.156417883502449  | 0.0652094004001671 |
| cg00047843      | 12 | 83321412  | TMTC2                                                           | -0.0881619 | -0.180619753075834  | 0.0652094004001671 |
| cg13070817      | 2  | 204861567 |                                                                 | -0.0486798 | -0.100278602399761  | 0.0652094004001671 |
| cg13148818      | 2  | 85956418  |                                                                 | 0.0168652  | 0.178984893768791   | 0.0652094004001671 |
| cg25150333      | 12 | 132195268 | SFRS8                                                           | 0.0197311  | 0.660939984645658   | 0.0652094004001671 |
| cg24799451      | 11 | 134093757 | NCAPD3;VPS26B                                                   | 0.00546344 | 0.481844426519193   | 0.0652094004001671 |
| cg17103081      | 4  | 22514419  | GPR125                                                          | -0.0663631 | -0.111430554091274  | 0.0652094004001671 |
| cg05814555      | 1  | 62902599  | USP1;USP1;USP1;USP1                                             | 0.0121553  | 0.463821415907693   | 0.0652094004001671 |
| cg15573783      | 19 | 45927056  | ERCC1;ERCC1;ERCC1;ERCC1;ERCC1                                   | 0.0277155  | 0.258304783477381   | 0.0652094004001671 |
| cg07143898      | 10 | 98945300  | SLIT1                                                           | 0.0190158  | 0.737166264855784   | 0.0652094004001671 |
| cg17985418      | 17 | 66031785  | KPNA2                                                           | 0.0206371  | 1.03839687079326    | 0.0652094004001671 |
| cg03450784      | 1  | 228358760 | IBA57                                                           | 0.00909407 | 0.013544099777652   | 0.0652094004001671 |
| cg06086148      | 3  | 128399777 |                                                                 | 0.0172908  | 0.966117951213305   | 0.0652094004001671 |
| cg20719132      | 19 | 56028425  | SSC5D                                                           | 0.016079   | 0.449739076101465   | 0.0652094004001671 |
| cg07844072      | 19 | 1372272   | MUM1;MUM1                                                       | -0.0563869 | -0.0907049266358928 | 0.0652094004001671 |
| cg08697280      | 20 | 36322294  | CTNBL1;CTNBL1                                                   | 0.0177721  | 0.535063766414878   | 0.0652094004001671 |
| cg12532831      | 4  | 144230446 |                                                                 | -0.0602921 | -0.106037555472037  | 0.0652094004001671 |
| cg24920997      | 3  | 192109830 | FGF12;FGF12                                                     | -0.0860804 | -0.20076879733906   | 0.0652094004001671 |
| cg19763809      | 2  | 98703475  | VWA3B                                                           | 0.0298374  | 0.402075561637214   | 0.0652094004001671 |
| cg24681048      | 20 | 25604516  | ZNF337-AS1;ZNF337-AS1;ZNF337-AS1;NANP                           | 0.0273047  | 0.622344363243982   | 0.0652094004001671 |
| cg00210473      | 6  | 41341942  |                                                                 | 0.0125438  | 0.4807205805073841  | 0.0652094004001671 |
| cg09554951      | 11 | 2890725   | KCNQ1DN                                                         | 0.0290764  | 0.559266416524886   | 0.0652094004001671 |
| cg14090374      | 1  | 85667233  | SYDE2                                                           | 0.0132492  | 0.472712373975146   | 0.0652094004001671 |
| cg14541281      | 16 | 22321484  | POLR3E;POLR3E;POLR3E;POLR3E;POLR3E                              | -0.0472542 | -0.0796460743371714 | 0.0652094004001671 |
| cg07475973      | 22 | 42306951  |                                                                 | 0.00557833 | 0.395702471226999   | 0.0652094004001671 |
| cg02973875      | 3  | 126196376 |                                                                 | -0.0813028 | -0.141792219488226  | 0.0652094004001671 |
| cg02112893      | 17 | 29718165  | RAB11FIP4                                                       | 0.0284344  | 0.465956358816795   | 0.0652094004001671 |
| cg15744637      | 11 | 809911    | RPLP2                                                           | 0.0366198  | 0.903126909380253   | 0.0652094004001671 |
| ch.1.198578402R | 1  | 200311779 |                                                                 | 0.00489731 | 0.398559779138434   | 0.0652094004001671 |
| cg15700924      | 7  | 139244174 |                                                                 | -0.0210618 | -0.0321406574225035 | 0.0652094004001671 |
| cg17796333      | 6  | 52511342  |                                                                 | -0.0149464 | -0.0224596424265915 | 0.0652094004001671 |
| cg11621243      | 20 | 20200773  | CFAP61                                                          | -0.0741439 | -0.128595989600617  | 0.0652094004001671 |
| cg20078939      | 11 | 33060711  | TCP11L1;TCP11L1                                                 | 0.0135202  | 0.699661756951133   | 0.0652094004001671 |
| cg25444556      | 5  | 153990114 |                                                                 | 0.00564994 | 0.508578851769046   | 0.0652094004001671 |
| cg24172570      | 7  | 27561178  |                                                                 | -0.0469667 | -0.0817263399554602 | 0.0652094004001671 |
| cg08823985      | 6  | 137366545 | IL20RA                                                          | -0.0908203 | -0.266230545677179  | 0.0654026339937296 |
| cg11973877      | 1  | 52195423  | OSBPL9;OSBPL9;OSBPL9;OSBPL9;OSBPL9;OSBPL9                       | 0.00926232 | 0.547591395420158   | 0.0655503107967182 |
| cg09826550      | 4  | 47839283  | CORIN                                                           | 0.0102061  | 0.58298979949485    | 0.0655503107967182 |
| cg04108296      | 1  | 167691246 | MPZL1;MPZL1;MPZL1;MPZL1;MPZL1;MPZL1                             | 0.0159242  | 0.507364748287883   | 0.0655936653150758 |
| cg02120513      | 5  | 36272252  |                                                                 | -0.0414744 | -0.0721708979541832 | 0.0657883333179143 |
| cg05174943      | 10 | 134513773 | INPP5A                                                          | -0.0190437 | -0.0289772694704869 | 0.0657883333179143 |
| cg18092614      | 17 | 40729792  | PSMC3IP;PSMC3IP;PSMC3IP;PSMC3IP;PSMC3IP;PSMC3IP;PSMC3IP;PSMC3IP | 0.0361091  | 0.611997648958867   | 0.0657883333179143 |
| cg04231929      | 9  | 93556220  |                                                                 | -0.0896076 | -0.209388460128029  | 0.0659412720310244 |
| cg20297940      | 1  | 14746121  |                                                                 | -0.0503674 | -0.0866316016232431 | 0.0659412720310244 |
| cg18785467      | 6  | 88412083  | NCRNA00120;AKIRIN2                                              | 0.0392611  | 0.544835372355626   | 0.0659412720310244 |
| cg01337508      | 17 | 40540572  | STAT3;STAT3;STAT3                                               | 0.0107816  | 0.480424235742401   | 0.0659412720310244 |
| cg25320496      | 2  | 130876007 | POTEF                                                           | -0.107667  | -0.264185861045224  | 0.0659412720310244 |
| cg08314899      | 12 | 102045493 | MYBPC1;MYBPC1;MYBPC1;MYBPC1;MYBPC1;MYBPC1;MYBPC1;MYBPC1;M       | -0.0585806 | -0.101635820641524  | 0.0659412720310244 |
| cg15794350      | 12 | 56395187  | SUOX;SUOX;SUOX                                                  | -0.0476823 | -0.0843587082856408 | 0.0659412720310244 |
| cg27452651      | 22 | 50312357  | ALG12;CRELD2;CRELD2;CRELD2;CRELD2                               | 0.017997   | 0.547055439471786   | 0.0659412720310244 |
| cg17790113      | 3  | 125652101 | ALG1L                                                           | -0.0189499 | -0.0290823711366943 | 0.0659412720310244 |
| cg01438737      | 20 | 42086396  | SFRS6                                                           | 0.0278108  | 1.14427033891715    | 0.0659412720310244 |
| cg14797322      | 12 | 58165899  | FAM119B;METTL1;METTL1;METTL1;METTL1;FAM119B                     | 0.0154812  | 1.28454544363917    | 0.0659412720310244 |
| cg24595041      | 2  | 9761870   | YWHAQ                                                           | -0.0586556 | -0.121974992885069  | 0.0659412720310244 |
| cg04728296      | 4  | 16641464  | CPE                                                             | -0.0333519 | -0.367200785486134  | 0.0659412720310244 |
| cg20469575      | 4  | 169122189 |                                                                 | -0.113616  | -0.215307713282418  | 0.0659412720310244 |
| cg24126592      | 11 | 46389363  | DGKZ;DGKZ;DGKZ;DGKZ                                             | 0.0527542  | 0.624237417326842   | 0.0659412720310244 |
| cg06466360      | 18 | 749231    | YES1                                                            | -0.0523583 | -0.0927575612330321 | 0.0659412720310244 |
| cg16976547      | 15 | 91433530  | FES;FES;FES;FES                                                 | -0.0353304 | -0.0561871104437334 | 0.0659412720310244 |
| cg25974903      | 1  | 65211057  | RAVER2                                                          | 0.0112255  | 0.479746537373149   | 0.0659412720310244 |
| cg11874143      | 3  | 138065751 | MRAS                                                            | -0.0665966 | -0.158163835077923  | 0.0660260871819099 |
| cg26894684      | 13 | 52378339  | DHRS12;DHRS12                                                   | 0.014579   | 0.800516642182949   | 0.0660431357896831 |
| cg05158631      | 6  | 43862455  | LINC01512                                                       | -0.0256036 | -0.0405336888650117 | 0.0660431357896831 |
| cg26471385      | 21 | 43299747  | PRDM15;PRDM15;PRDM15;PRDM15;PRDM15                              | 0.0144673  | 0.610126967879684   | 0.0660431357896831 |
| cg19034733      | 8  | 130096484 |                                                                 | -0.0371837 | -0.0601080869844593 | 0.0660431357896831 |
| cg14033917      | 1  | 32609664  | KPNA6                                                           | -0.0773353 | -0.143263486343489  | 0.0661490926086976 |
| cg23664545      | 17 | 74070257  | GALR2                                                           | 0.0425443  | 0.504219587703997   | 0.0661490926086976 |



|             |    |           |                                                   |             |                      |                    |
|-------------|----|-----------|---------------------------------------------------|-------------|----------------------|--------------------|
| cg25992738  | 7  | 152589017 |                                                   | -0.078651   | -0.163853664306983   | 0.0661490926086976 |
| cg22120988  | 12 | 65515350  | WIF1                                              | 0.0259843   | 0.835081703773288    | 0.0661490926086976 |
| cg25348336  | 2  | 39003850  | GEMIN6                                            | -0.0634628  | -0.139071793271966   | 0.0661490926086976 |
| cg02181968  | 12 | 39836347  | KIF21A                                            | 0.0209423   | 0.4259353237836      | 0.0661490926086976 |
| cg02402209  | 4  | 152249812 |                                                   | -0.0938889  | -0.178857127323233   | 0.0661490926086976 |
| cg07691152  | 12 | 103355123 |                                                   | 0.0486774   | 0.376808370987826    | 0.0661490926086976 |
| cg23454177  | 16 | 67970396  | PSMB10                                            | 0.0141861   | 0.89934394879734     | 0.0661490926086976 |
| cg021753290 | 20 | 37376903  | ACTR5                                             | 0.0092375   | 0.746942385692137    | 0.0661868360705664 |
| cg11644394  | 7  | 144148615 |                                                   | -0.118111   | -0.244881827795912   | 0.0661868360705664 |
| cg27484621  | 18 | 6788200   |                                                   | -0.019483   | -0.0295778373718991  | 0.0661868360705664 |
| cg03580256  | 1  | 78149279  | ZZZ3:ZZZ3                                         | 0.0220957   | 0.381684666113491    | 0.0661868360705664 |
| cg11555752  | 3  | 187925787 | LPP                                               | -0.0146395  | -0.0221426921486004  | 0.0661868360705664 |
| cg09453280  | 14 | 35403910  |                                                   | -0.0538564  | -0.0856147183223715  | 0.0661868360705664 |
| cg05702448  | 1  | 167905194 | DCAF6:BRP44;BRP44;BRP44;DCAF6;BRP44               | 0.0417355   | 1.01364336907873     | 0.0661868360705664 |
| cg13027404  | 15 | 53095984  |                                                   | 0.0245252   | 0.784194577061812    | 0.0661868360705664 |
| cg01334211  | 8  | 141729014 | PTK2;PTK2;PTK2                                    | -0.0774735  | -0.17907950513204    | 0.0663898045527364 |
| cg13916146  | 15 | 63248230  |                                                   | -0.0583237  | -0.100317834464066   | 0.0663898045527364 |
| cg25202793  | 8  | 129829827 |                                                   | 0.0743718   | 0.134574371616318    | 0.0663898045527364 |
| cg17087373  | 10 | 82212706  | TSPAN14;TSPAN14                                   | -0.0738093  | -0.134818511083352   | 0.0664628725553255 |
| cg25192948  | 1  | 32479490  | KHDRBS1;KHDRBS1                                   | 0.0280339   | 0.567957299019665    | 0.0664628725553255 |
| cg17891820  | 4  | 55524400  | KIT;KIT                                           | 0.0102474   | 0.545270756457071    | 0.0664628725553255 |
| cg08216131  | 20 | 2637503   | NOP56;SNORD57;NOP56                               | 0.0134433   | 0.0204176034509982   | 0.0664628725553255 |
| cg21302194  | 4  | 155412348 | DCHS2;DCHS2                                       | 0.0349949   | 0.707996772204644    | 0.0664628725553255 |
| cg03195060  | 15 | 74334206  | PML;PML;PML;PML                                   | 0.00838194  | 0.0124230971012386   | 0.0664628725553255 |
| cg18153578  | 19 | 38893604  | FAM98C                                            | 0.00929316  | 0.52173210577385     | 0.0664628725553255 |
| cg27052090  | 14 | 54939059  |                                                   | -0.0621383  | -0.10661152516315    | 0.0664628725553255 |
| cg03710333  | 4  | 1722958   | TMEM129;TACC3;TMEM129;TMEM129;TMEM129             | 0.00890594  | 0.438634761534602    | 0.0664838944298731 |
| cg16855870  | 2  | 886764    |                                                   | -0.0367075  | -0.0581332705383853  | 0.0666128737106594 |
| cg21646191  | 1  | 116381654 | NHLH2;NHLH2                                       | 0.0306331   | 0.812722276007753    | 0.066665239364637  |
| cg25342861  | 17 | 45177598  |                                                   | 0.0196743   | 0.588557896110531    | 0.0666655228457385 |
| cg03922588  | 11 | 62473871  | GNG3;BSCL2;BSCL2;BSCL2;BSCL2;HNRNPUL2;BSCL2;BSCL2 | 0.0366306   | 0.667536985579221    | 0.0666655228457385 |
| cg25506386  | 3  | 63849756  | THOC7;ATXN7;ATXN7                                 | 0.0274603   | 0.741032989353084    | 0.0666655228457385 |
| cg01030973  | 1  | 2574695   |                                                   | -0.00794304 | -0.367825768432081   | 0.0666655228457385 |
| cg05415131  | 11 | 58940866  | DTX4                                              | 0.0161662   | 0.536945532878599    | 0.0666655228457385 |
| cg01624301  | 9  | 128469583 | MAPKAP1;MAPKAP1;MAPKAP1;MAPKAP1;MAPKAP1;MAPKAP1   | 0.0135492   | 0.41260120602019     | 0.0666655228457385 |
| cg01579535  | 12 | 54447292  | HOXC4;HOXC4                                       | 0.0349119   | 0.655390081150558    | 0.0666655228457385 |
| cg24695441  | 1  | 16751686  | SPATA21                                           | -0.0720143  | -0.1442042488924831  | 0.0666655228457385 |
| cg03458099  | 2  | 223532694 |                                                   | -0.0508228  | -0.0836523324846008  | 0.0666655228457385 |
| cg05110693  | 16 | 71928225  | IST1;IST1;IST1;IST1;IST1;IST1                     | 0.0296421   | 0.532394403591275    | 0.0666655228457385 |
| cg25531497  | 10 | 25465219  | GPR158;LOC100128811                               | 0.0151848   | 0.548247224818937    | 0.0666655228457385 |
| cg04293275  | 10 | 9710767   |                                                   | -0.0625361  | -0.105285466599518   | 0.0667384182260743 |
| cg23126234  | 2  | 229549575 |                                                   | -0.025976   | -0.0410429808465107  | 0.0667384182260743 |
| cg26261342  | 12 | 56512029  | ZC3H10;ZC3H10                                     | 0.00791586  | 0.405898988950705    | 0.0667401829846008 |
| cg21144673  | 22 | 42017783  | PPPDE2;XRCC6                                      | 0.0109167   | 0.682870904583575    | 0.0667401829846008 |
| cg04258637  | 8  | 100907546 | COXC6                                             | -0.0651819  | -0.18936742821514    | 0.0667401829846008 |
| cg02654704  | 16 | 74685448  | RFWD3                                             | -0.0645434  | -0.120823653883946   | 0.0667401829846008 |
| cg08677672  | 12 | 124891822 | NCOR2;NCOR2;NCOR2                                 | 0.0146458   | 0.0224811258718943   | 0.0667401829846008 |
| cg19656847  | 11 | 75996257  |                                                   | -0.0628894  | -0.109192569856681   | 0.0667401829846008 |
| cg11351687  | 6  | 170863423 | PSMB1;TBP                                         | 0.0295069   | 0.762155123697487    | 0.0667401829846008 |
| cg06497893  | 4  | 152454119 | FAM160A1                                          | -0.077181   | -0.157849813933024   | 0.0667401829846008 |
| cg25370859  | 12 | 107712557 | BTBD11;BTBD11                                     | 0.0165048   | 0.737893631015884    | 0.0667401829846008 |
| cg03758181  | 10 | 102989325 | FLJ41350;LBX1                                     | 0.0117322   | 0.387474561943846    | 0.0667401829846008 |
| cg20118422  | 15 | 64455210  | PPIB;PPIB                                         | 0.0545486   | 0.6982471580451291   | 0.0667401829846008 |
| cg10007520  | 16 | 88658109  | ZC3H18;ZC3H18                                     | -0.0960955  | -0.208661663550529   | 0.0667401829846008 |
| cg14069192  | 9  | 99381052  | CDC14B;CDC14B                                     | 0.0199868   | 0.369733209362439    | 0.0667401829846008 |
| cg22340644  | 7  | 75368344  | HIP1                                              | 0.00812151  | 0.494559271270775    | 0.0667401829846008 |
| cg16618685  | 16 | 23608722  | NDUFAB1                                           | -0.0737672  | -0.124192346586474   | 0.0667401829846008 |
| cg27072387  | 2  | 33171699  | LTBP1                                             | 0.00833402  | 0.507248483134157    | 0.0667401829846008 |
| cg18331855  | 17 | 1131781   |                                                   | 0.0277704   | 0.679807548501624    | 0.0667401829846008 |
| cg22489991  | 6  | 11383195  | NEDD9;NEDD9                                       | -0.0898996  | -0.170678605305438   | 0.0667401829846008 |
| cg14719675  | 2  | 25142882  | ADCY3                                             | 0.0197358   | 0.475800999674804    | 0.0667401829846008 |
| cg10932242  | 14 | 100659592 |                                                   | 0.0217799   | 1.15157032343142     | 0.0667401829846008 |
| cg26653326  | 8  | 124742606 | ANXA13;ANXA13                                     | -0.124359   | -0.276655350261752   | 0.0668638661234761 |
| cg08104527  | 18 | 13217953  | C18orf1;C18orf1                                   | 0.0161083   | 0.355005153130846    | 0.0669305281337343 |
| cg16632132  | 16 | 1122873   | LOC146336                                         | 0.040199    | 0.649009570646493    | 0.066929898153562  |
| cg23294576  | 4  | 89128206  | ABCG2                                             | -0.079682   | -0.162619380151936   | 0.0670918661730173 |
| cg01430633  | 9  | 138987312 | NACC2                                             | 0.0407259   | 0.81621312912713     | 0.0670918661730173 |
| cg21955154  | 4  | 40999951  | APBB2;APBB2;APBB2                                 | -0.0610445  | -0.15562056166921    | 0.0672382154742153 |
| cg21442773  | 1  | 236029828 | LYST                                              | 0.0186753   | 0.862712341856214    | 0.0673722200276347 |
| cg03554573  | 11 | 111155021 | C11orf53                                          | 0.0761961   | 0.271203745384014    | 0.0673722200276347 |
| cg13608561  | 12 | 68039127  |                                                   | -0.00616156 | -0.00910854410134222 | 0.0673722200276347 |
| cg08844364  | 6  | 108850201 |                                                   | 0.00806831  | 0.0119525157018139   | 0.0673722200276347 |
| cg26589485  | 17 | 1838439   | RTN4RL1                                           | -0.01872    | -0.0285102968769093  | 0.0673722200276347 |
| cg15067515  | 12 | 49667670  |                                                   | -0.0473166  | -0.0784004114853347  | 0.0673722200276347 |
| cg01919034  | 15 | 69741819  |                                                   | -0.099886   | -0.204032278831079   | 0.0673722200276347 |
| cg22944187  | 12 | 128306001 |                                                   | -0.0594492  | -0.0959732587125408  | 0.0674981221322804 |
| cg20684937  | 5  | 12661875  |                                                   | -0.0416046  | -0.0641673706237992  | 0.0674981221322804 |
| cg00561610  | 3  | 52480253  | SEMA3G                                            | 0.00865477  | 0.0128215351147261   | 0.0674981221322804 |
| cg04725029  | 1  | 15850746  | CASP9;CASP9;CASP9;CASP9                           | 0.0186687   | 0.539788590720692    | 0.0674981221322804 |
| cg13974753  | 5  | 149553071 | CDX1                                              | -0.0130167  | -0.0194950122693138  | 0.0676818262290003 |
| cg07576016  | 5  | 1523261   | LPCAT1                                            | 0.0154165   | 0.72098387232332     | 0.0676939125229721 |
| cg24634568  | 1  | 43250769  |                                                   | 0.0795442   | 0.616146638289077    | 0.0676939125229721 |

|            |    |           |                                                                       |            |                     |                    |
|------------|----|-----------|-----------------------------------------------------------------------|------------|---------------------|--------------------|
| cg15924509 | 1  | 2322543   | RER1;MORN1                                                            | 0.0081002  | 0.385113784340493   | 0.0676939125229721 |
| cg10884662 | 15 | 75871802  | PTPN9                                                                 | 0.0388406  | 0.713801807073141   | 0.0676939125229721 |
| cg14832349 | 16 | 54301124  | LOC100996338                                                          | -0.117309  | -0.228800020059811  | 0.0676939125229721 |
| cg26325497 | 19 | 54199538  | MIR525                                                                | -0.121804  | -0.434835675413966  | 0.0676939125229721 |
| cg20819397 | 9  | 123964132 | RAB14;RAB14                                                           | 0.0155343  | 0.793614066711042   | 0.0676939125229721 |
| cg21325609 | 15 | 90645961  | IDH2;IDH2                                                             | 0.00940004 | 0.50362442770184    | 0.0677792193279821 |
| cg04193484 | 12 | 57620856  |                                                                       | 0.0187291  | 0.631442802911594   | 0.0679131757592796 |
| cg14397361 | 9  | 140149997 | COBRA1                                                                | 0.0464092  | 1.86275053013731    | 0.0679131757592796 |
| cg05118743 | 7  | 36013332  |                                                                       | -0.0296357 | -0.0471633988779721 | 0.0679131757592796 |
| cg22346963 | 1  | 172247606 | DNM3;DNM3                                                             | -0.0764813 | -0.161761733001979  | 0.0679131757592796 |
| cg10585421 | 8  | 52850164  |                                                                       | -0.0585772 | -0.119620198552922  | 0.0679131757592796 |
| cg24619626 | 15 | 25380133  | PAR1                                                                  | -0.0198069 | -0.0299677311168329 | 0.0679131757592796 |
| cg00661205 | 13 | 42400902  | KIAA0564;KIAA0564                                                     | -0.0537476 | -0.101416748230367  | 0.0679131757592796 |
| cg15288815 | 8  | 74659085  | STAU2;STAU2;STAU2;STAU2;STAU2;STAU2;STAU2;STAU2;STA                   | 0.00688114 | 0.626238705440777   | 0.0679225427004522 |
| cg15834198 | 2  | 65701984  |                                                                       | -0.0272748 | -0.0421752846767146 | 0.0680264516709495 |
| cg22932101 | 14 | 71815816  |                                                                       | -0.113009  | -0.254664391395558  | 0.0680556560389075 |
| cg17026475 | 15 | 37391480  | MEIS2;MEIS2;MEIS2;MEIS2;MEIS2;MEIS2;MEIS2;MEIS2;MEIS2                 | 0.0114949  | 0.670500229142117   | 0.068135787766705  |
| cg02568904 | 19 | 36606206  | TBCB;TBCB;TBCB;POLR2I                                                 | 0.0285316  | 0.725565119142183   | 0.0682610117226496 |
| cg21045612 | 9  | 17134839  | CNTLN;CNTLN;CNTLN;CNTLN                                               | 0.0267191  | 0.578398687214591   | 0.0682710808114525 |
| cg13023786 | 15 | 79606973  | TMED3;TMED3;TMED3                                                     | 0.00485113 | 0.00712809767445071 | 0.0683829546751411 |
| cg05435065 | 7  | 75544030  | POR                                                                   | 0.0232064  | 0.971863494070089   | 0.0683829546751411 |
| cg03119031 | 6  | 31620547  | BAT3;BAT3;BAT3;BAT3                                                   | 0.00539473 | 0.417957333411673   | 0.0686618404415626 |
| cg18228326 | 1  | 17446068  | PADI2                                                                 | 0.00535572 | 0.360465727343792   | 0.068825152040529  |
| cg24654547 | 16 | 68057165  | DUS2L;DDX28;DDX28                                                     | 0.0801211  | 1.59762538018473    | 0.068825152040529  |
| cg19350162 | 12 | 124927552 | NCOR2;NCOR2                                                           | -0.0361134 | -0.0577976526267136 | 0.068825152040529  |
| cg04581285 | 16 | 24682924  | LINC01567                                                             | -0.0578514 | -0.1024754114988    | 0.068825152040529  |
| cg24529484 | 19 | 47933421  | SLC8A2                                                                | 0.0167611  | 0.470417053481473   | 0.068825152040529  |
| cg00221445 | 8  | 74183964  |                                                                       | -0.0392332 | -0.0611677225412433 | 0.068825152040529  |
| cg09336406 | 2  | 20068906  |                                                                       | 0.0200486  | 0.60305963078358    | 0.068825152040529  |
| cg12928759 | 2  | 74756470  | HTRA2;AUP1;HTRA2                                                      | 0.0282419  | 0.557838571327992   | 0.068825152040529  |
| cg24159214 | 3  | 50402751  | CACNA2D2;CACNA2D2                                                     | 0.0178771  | 0.427387653273019   | 0.068825152040529  |
| cg15427004 | 3  | 38179858  | ACAA1;ACAA1;ACAA1;MYD88                                               | 0.0100488  | 0.492674273285443   | 0.068825152040529  |
| cg19325000 | 2  | 74710102  | CCDC142;CCDC142;TTC31;TTC31                                           | 0.00945089 | 0.752825698719212   | 0.068825152040529  |
| cg09868336 | 3  | 68981866  | FAM19A4;FAM19A4                                                       | 0.0335389  | 0.566566739088038   | 0.068825152040529  |
| cg11227817 | 11 | 133716095 | SPATA19;SPATA19                                                       | -0.0371399 | -0.0582228061554492 | 0.068825152040529  |
| cg24356725 | 4  | 1340288   | KIAA1530                                                              | 0.0100549  | 0.490637109857105   | 0.068825152040529  |
| cg13482308 | 9  | 37002685  | PAX5                                                                  | 0.0292463  | 0.704030128842211   | 0.068825152040529  |
| cg00680003 | 6  | 30523449  | GNL1;PRR3;PRR3                                                        | 0.0375622  | 0.548565403805705   | 0.0688574585918995 |
| cg04704021 | 7  | 100942858 |                                                                       | 0.034448   | 0.5254447445519798  | 0.0688574585918995 |
| cg20974817 | 16 | 89788246  | ZNF276;ZNF276;ZNF276;ZNF276;ZNF276;ZNF276;ZNF276;ZNF276;ZNF276;ZNF276 | 0.0172568  | 1.09493594582349    | 0.068953268497513  |
| cg05373655 | 1  | 228660732 |                                                                       | -0.0543392 | -0.13285734858933   | 0.0689639948460279 |
| cg09718295 | 6  | 160182856 | ACAT2                                                                 | 0.0245779  | 0.826662953709992   | 0.069124782163179  |
| cg09039698 | 16 | 30007384  | HIRIP3;INO80E;HIRIP3                                                  | 0.0081088  | 0.553085776371742   | 0.0692049703646304 |
| cg16406226 | 20 | 42086458  | SFRS6                                                                 | 0.0290504  | 0.506625376419407   | 0.0692288869536783 |
| cg01706621 | 15 | 88247258  |                                                                       | -0.0607077 | -0.100583133167584  | 0.0692288869536783 |
| cg27022615 | 11 | 70049105  | FADD                                                                  | 0.0120178  | 0.68621313813335    | 0.0692561608659109 |
| cg20137918 | 1  | 52388141  | RAB3B                                                                 | -0.0546464 | -0.0888374443167739 | 0.0692561608659109 |
| cg13137376 | 6  | 30712221  | IER3                                                                  | 0.0332586  | 0.543056800558439   | 0.0692561608659109 |
| cg24714100 | 6  | 30290603  | HCG18;HCG18                                                           | -0.096206  | -0.224224641526472  | 0.0692561608659109 |
| cg20964023 | 14 | 91976739  | SMEK1                                                                 | 0.0134801  | 0.497143742163714   | 0.0692561608659109 |
| cg02641288 | 5  | 1883011   | IRX4                                                                  | 0.00803118 | 0.492895025293279   | 0.0692561608659109 |
| cg00731917 | 18 | 60263973  |                                                                       | 0.0122251  | 0.433683677050834   | 0.0692561608659109 |
| cg02986878 | 9  | 117275370 |                                                                       | -0.0751748 | -0.135623665856737  | 0.0693509726914498 |
| cg11825411 | 7  | 50631741  | DDC                                                                   | -0.0105446 | -0.0158400268623194 | 0.0693509726914498 |
| cg10825881 | 15 | 52252059  | TMOD3                                                                 | -0.058409  | -0.104606622684285  | 0.0693509726914498 |
| cg26220419 | 11 | 107880052 | CUL5;CUL5                                                             | 0.0113388  | 1.28117575888744    | 0.0693509726914498 |
| cg04905448 | 2  | 69002063  | ARHGAP25;ARHGAP25;ARHGAP25;ARHGAP25;ARHGAP25;ARHGAP25                 | 0.00927822 | 0.674067907218933   | 0.0693509726914498 |
| cg07995179 | 6  | 85484287  |                                                                       | 0.00864154 | 0.5144481263165439  | 0.0693509726914498 |
| cg12662767 | 14 | 75421955  | PGF;PGF;PGF;PGF;PGF;PGF                                               | 0.00824612 | 0.452671372167894   | 0.0693958169019876 |
| cg15119683 | 6  | 38533031  | BTBD9;BTBD9;BTBD9;BTBD9                                               | -0.0937123 | -0.18144548728506   | 0.0694216674076264 |
| cg10830758 | 10 | 95462430  | C10orf4                                                               | 0.0128775  | 0.663971368229475   | 0.0695020477439938 |
| cg15363887 | 11 | 57414557  | YPEL4                                                                 | 0.0416918  | 0.427968322678043   | 0.0695070059736163 |
| cg12171249 | 7  | 11606963  | THSD7A                                                                | -0.0686292 | -0.16384789115108   | 0.0695207673697441 |
| cg03480336 | 21 | 33800475  | EVA1C;EVA1C;EVA1C                                                     | -0.0283903 | -0.0439254787173863 | 0.0698413931085226 |
| cg00529697 | 5  | 75013131  | C5orf37;C5orf37                                                       | 0.0431308  | 0.549096938240806   | 0.0698413931085226 |
| cg21294812 | 6  | 13272270  | MOXD1                                                                 | 0.0114735  | 0.619699660142433   | 0.0698413931085226 |
| cg08886046 | 2  | 130691738 | LOC389033                                                             | 0.0956877  | 0.525160982547562   | 0.0698413931085226 |
| cg24182293 | 3  | 193852998 | HES1                                                                  | 0.0181238  | 0.360335670578433   | 0.0698413931085226 |
| cg18753296 | 6  | 31630923  | BAT4                                                                  | -0.0196436 | -0.0305931726424344 | 0.0698413931085226 |
| cg00597931 | 8  | 142179697 | DENND3                                                                | -0.0160966 | -0.0240872037031929 | 0.0698413931085226 |
| cg05862114 | 7  | 130132259 | MEST;MEST;MEST1T1;MEST                                                | 0.0599482  | 0.318030270554114   | 0.0698413931085226 |
| cg17053871 | 20 | 34043114  | CEP250                                                                | 0.0228153  | 0.63723156770247    | 0.0698413931085226 |
| cg11059266 | 4  | 48782139  | FRYL;FRYL                                                             | 0.0373426  | 0.440988748437561   | 0.0698413931085226 |
| cg24059612 | 19 | 54585167  | TARM1                                                                 | -0.0598222 | -0.0995865756832643 | 0.0698413931085226 |
| cg17117277 | 19 | 3822126   | ZFR2                                                                  | 0.0127871  | 0.79943715311292    | 0.0698413931085226 |
| cg10507649 | 21 | 43916595  | RSPH1                                                                 | 0.0148768  | 0.48146894460905    | 0.0698413931085226 |
| cg25044026 | 6  | 84418700  | SNAP91;SNAP91;SNAP91;SNAP91;SNAP91;SNAP91                             | 0.023455   | 0.401170126499314   | 0.0698413931085226 |
| cg19175585 | 16 | 71392493  | CALB2;CALB2;CALB2                                                     | 0.00589759 | 0.39878600832016    | 0.0698413931085226 |
| cg02081018 | 21 | 38445169  | PIGP;PIGP;TTC3;PIGP                                                   | 0.0162754  | 0.458734723964053   | 0.0698413931085226 |
| cg10858909 | 4  | 99850288  | E1F4E;E1F4E;E1F4E;E1F4E                                               | 0.0046494  | 0.44863626650379    | 0.0698413931085226 |
| cg21183638 | 22 | 31701338  |                                                                       | -0.0779385 | -0.159734882689133  | 0.0698413931085226 |
| cg15809122 | 22 | 23487482  | RAB36                                                                 | 0.0127073  | 0.495904593242237   | 0.0698413931085226 |



|                 |    |           |                                                   |            |                     |                    |
|-----------------|----|-----------|---------------------------------------------------|------------|---------------------|--------------------|
| cg26175410      | 17 | 74233903  | RNF157                                            | -0.0202907 | -0.0305491679259575 | 0.0698465658529427 |
| cg19120943      | 2  | 113304419 | POLR1B;POLR1B;POLR1B;POLR1B;POLR1B;POLR1B         | -0.0627494 | -0.114893840389393  | 0.0698465658529427 |
| cg19948014      | 21 | 33032656  | SOD1                                              | 0.0065562  | 0.551876613321316   | 0.0698465658529427 |
| cg18590436      | 5  | 159582684 |                                                   | -0.0298833 | -0.0461271162428214 | 0.0698465658529427 |
| cg26213885      | 1  | 88675834  |                                                   | -0.0169038 | -0.0263495156835324 | 0.0698465658529427 |
| cg26095478      | 22 | 46377526  |                                                   | -0.0678056 | -0.123937180161904  | 0.0698465658529427 |
| cg24863821      | 10 | 3793247   |                                                   | -0.0128338 | -0.019431152077021  | 0.0698465658529427 |
| cg27380774      | 11 | 1000560   | AP2A2                                             | -0.0235567 | -0.0365569525791144 | 0.0698465658529427 |
| cg16895948      | 1  | 145610875 | POLR3C;POLR3C;RNF115                              | 0.0125308  | 0.910476005474599   | 0.0698465658529427 |
| cg21694044      | 22 | 41215540  | SLC25A17                                          | 0.0337799  | 0.356285627744798   | 0.0698465658529427 |
| cg08164950      | 6  | 147981771 |                                                   | -0.0312777 | -0.0483289087414644 | 0.0698465658529427 |
| cg00994643      | 8  | 23082826  | TNFRSF10A                                         | 0.0168936  | 0.784023726389372   | 0.0698465658529427 |
| cg25960393      | 8  | 9106559   |                                                   | -0.0976028 | -0.520849470489707  | 0.0698465658529427 |
| cg13173369      | 1  | 32444348  |                                                   | -0.0285244 | -0.0467436392800985 | 0.0698465658529427 |
| cg25942155      | 20 | 2607828   | TMC2                                              | -0.0121865 | -0.0182994206022411 | 0.0698465658529427 |
| cg06070291      | 15 | 44828899  | EIF3J                                             | 0.0386422  | 0.871203717104843   | 0.0698465658529427 |
| cg09753043      | 11 | 43596920  |                                                   | 0.0156151  | 0.489485721447394   | 0.0698465658529427 |
| cg18289490      | 20 | 48532070  | SPATA2;SPATA2                                     | 0.0525901  | 0.899503126304331   | 0.0698465658529427 |
| cg12194493      | 4  | 493061    | PIGG;ZNF721;PIGG;PIGG;PIGG;ZNF721                 | 0.00484296 | 0.390896765553131   | 0.0698465658529427 |
| cg11989968      | 2  | 173421429 | PK1;PK1;PK1;PK1                                   | 0.00793331 | 0.62196614418815    | 0.0698465658529427 |
| cg12789522      | 15 | 78423758  | CIB2;CIB2                                         | 0.0294098  | 0.450542196222334   | 0.0698465658529427 |
| cg06316818      | 15 | 83306789  | CPEB1;CPEB1                                       | -0.0515781 | -0.0826188661110486 | 0.0698656661582179 |
| cg10483909      | 1  | 243418637 | CEP170;CEP170;CEP170;SDCCAG8;CEP170;CEP170;CEP170 | 0.00563946 | 0.343912413988546   | 0.0698656661582179 |
| cg09870066      | 2  | 68546685  | CNRIP1;CNRIP1;CNRIP1;CNRIP1                       | 0.0251553  | 0.554688962033358   | 0.0698656661582179 |
| cg13471915      | 1  | 162531167 | UAP1                                              | 0.00650095 | 0.365706009454905   | 0.0698656661582179 |
| cg01114186      | 6  | 31940183  | STK19;STK19;STK19;DOM3Z                           | 0.0129503  | 0.596390213262971   | 0.0698656661582179 |
| cg24554839      | 1  | 166124903 | MIR921;FAM78B                                     | -0.0186429 | -0.029865228175759  | 0.0698656661582179 |
| cg14792270      | 11 | 85955165  | EED;EED                                           | -0.0444832 | -0.155144302977824  | 0.0698656661582179 |
| cg10319399      | 8  | 145018285 | PLEC1;PLEC1;PLEC1;PLEC1;PLEC1;PLEC1               | 0.023048   | 0.647783904676687   | 0.0698656661582179 |
| ch.2.157204871R | 2  | 157496625 |                                                   | 0.0109292  | 0.386869091163178   | 0.0698656661582179 |
| cg02625641      | 15 | 59041175  | ADAM10                                            | 0.0442595  | 0.931903413038198   | 0.0698656661582179 |
| cg01771876      | 2  | 11886613  | LPIN1                                             | 0.0242658  | 0.729643425856769   | 0.0698656661582179 |
| cg17938619      | 18 | 8929488   |                                                   | -0.0429504 | -0.0695309794259912 | 0.0698656661582179 |
| cg22837406      | 14 | 76618409  | C14orf118;C14orf118                               | 0.0246656  | 0.486244586802427   | 0.0698656661582179 |
| cg01579019      | 8  | 27695516  | PBK                                               | 0.00978815 | 0.497516790145951   | 0.0698656661582179 |
| cg17864958      | 1  | 224370909 | DEGS1;DEGS1                                       | 0.044987   | 0.557143748203732   | 0.0698656661582179 |
| cg13529288      | 7  | 100209880 | MOSPD3;MOSPD3;MOSPD3;MOSPD3                       | 0.0110005  | 0.692175081776973   | 0.0698656661582179 |
| cg27365485      | 11 | 64126452  | RPS6KA4;RPS6KA4                                   | 0.026834   | 0.765039727677897   | 0.0698812827786955 |
| cg02676434      | 3  | 38066785  | PLCD1;PLCD1;PLCD1                                 | 0.00430861 | 0.382352013515795   | 0.069933977138814  |
| cg05949385      | 1  | 199984216 |                                                   | -0.0953656 | -0.182742827361973  | 0.0703791515614276 |
| cg18663063      | 5  | 68710907  | MARVELD2;MARVELD2                                 | 0.0396169  | 0.480489590292583   | 0.0703791515614276 |
| cg23525438      | 6  | 17016226  |                                                   | 0.0977455  | 0.60453010276933    | 0.0705201853386366 |
| cg061014792     | 17 | 7382760   | ZBTB4;ZBTB4                                       | 0.0185336  | 0.617312555674958   | 0.0705201853386366 |
| cg11990813      | 17 | 2603739   | KIAA0664                                          | -0.034898  | -0.0550739769114628 | 0.0707051197797108 |
| cg22111723      | 13 | 21872664  |                                                   | 0.0196094  | 0.920862944377972   | 0.0707051197797108 |
| cg10151248      | 11 | 66639567  | PC;PC;PC                                          | -0.0278134 | -0.0430429552043742 | 0.070755072675609  |
| cg20997773      | 11 | 117667841 | DSCAML1                                           | 0.0155901  | 0.478624042642867   | 0.0707707474335027 |
| cg22238304      | 2  | 206981412 | LOC100329109                                      | -0.0570367 | -0.122952157528604  | 0.0707707474335027 |
| cg23105839      | 10 | 135050004 | VENTX                                             | 0.0207225  | 0.842648463882748   | 0.0707707474335027 |
| cg02239805      | 7  | 114562316 | MDFIC;MDFIC;MDFIC;MDFIC;MDFIC                     | 0.0392744  | 0.557417713504868   | 0.0707707474335027 |
| cg01216311      | 17 | 7025714   |                                                   | -0.0669433 | -0.438671125866982  | 0.0707707474335027 |
| cg01337968      | 7  | 129355101 | NRF1;NRF1;NRF1;NRF1                               | -0.0376147 | -0.0584057326485407 | 0.0707707474335027 |
| cg05655069      | 3  | 119883253 |                                                   | -0.0158786 | -0.0238812756240304 | 0.0707707474335027 |
| cg02729011      | 16 | 699500    | WDR90                                             | 0.0228263  | 0.62762758322207    | 0.0707707474335027 |
| cg04210100      | 2  | 9614471   | IAH1                                              | 0.0210803  | 0.690230249999299   | 0.0707707474335027 |
| cg04111478      | 11 | 1991677   |                                                   | 0.0705047  | 0.425941334234999   | 0.0707707474335027 |
| cg04330730      | 1  | 48472619  |                                                   | -0.0612519 | -0.137445585008078  | 0.0707707474335027 |
| cg19774733      | 9  | 37422586  | GRHPR                                             | 0.0295388  | 0.860020129994756   | 0.0707707474335027 |
| cg13787878      | 20 | 35808076  | C20orf132;RPN2;RPN2;C20orf132;C20orf132           | 0.0208204  | 0.828758300183899   | 0.0707707474335027 |
| cg22476645      | 16 | 15150025  | NTAN1                                             | 0.0122546  | 0.466212757500362   | 0.0707707474335027 |
| cg19496491      | 11 | 12695499  | TEAD1                                             | 0.0160433  | 0.894008366304978   | 0.0707707474335027 |
| cg07828939      | 11 | 3021385   |                                                   | 0.0128664  | 0.0193565148993785  | 0.0707707474335027 |
| cg27275821      | 1  | 89144331  | PKN2-AS1                                          | -0.0714497 | -0.12588410148372   | 0.0707707474335027 |
| cg04100564      | 12 | 112189172 | ACAD10;ACAD10                                     | -0.0687675 | -0.120352453845238  | 0.0707707474335027 |
| cg11895632      | 16 | 69042429  | TANGO6                                            | -0.0428722 | -0.0672063207553237 | 0.0707707474335027 |
| cg17395226      | 5  | 156887490 | NIPAL4                                            | 0.00654903 | 0.322699819960425   | 0.0707707474335027 |
| cg27026509      | 1  | 36348944  | EIF2C1;EIF2C1                                     | 0.0205239  | 0.667790270486458   | 0.0707707474335027 |
| cg16722016      | 12 | 90119262  |                                                   | -0.0635798 | -0.106299889411578  | 0.0707707474335027 |
| cg16267901      | 12 | 58023160  | B4GALNT1;B4GALNT1;B4GALNT1                        | -0.072248  | -0.147467592783699  | 0.0707707474335027 |
| cg13307023      | 16 | 1359278   | UBE2I;UBE2I;UBE2I;UBE2I                           | 0.00420466 | 0.325218724318322   | 0.0707707474335027 |
| cg17115258      | 15 | 102192853 | TM2D3;TM2D3                                       | 0.00640854 | 0.405650921232712   | 0.0707707474335027 |
| cg23382141      | 6  | 73976708  | KHDC1                                             | -0.044658  | -0.0716511214297538 | 0.0707707474335027 |
| cg14697246      | 3  | 48487981  | ATRIP;ATRIP                                       | 0.00728843 | 0.395045069979816   | 0.0707707474335027 |
| cg02328440      | 1  | 235813839 | GNG4;GNG4;GNG4                                    | 0.0116789  | 0.452286045292904   | 0.0707707474335027 |
| cg25312546      | 19 | 4307208   | FSD1                                              | -0.0680868 | -0.129274539558278  | 0.0707707474335027 |
| cg05835573      | 2  | 159650648 | DAPL1                                             | -0.0694917 | -0.115993493364808  | 0.0707707474335027 |
| cg01431319      | 10 | 51595391  | TIMM23;TIMM23;TIMM23;TIMM23B;TIMM23B;TIMM23B      | -0.03468   | -0.0562783726960634 | 0.0707707474335027 |
| cg00422716      | 7  | 123484985 | HYAL4                                             | -0.0544499 | -0.0983016040849037 | 0.0707707474335027 |
| cg15817341      | 5  | 150538450 | ANXA6                                             | -0.0415419 | -0.0666779382349045 | 0.0707707474335027 |
| cg12074084      | 1  | 45140087  | C1orf228;TMEM53;TMEM53                            | 0.0298123  | 0.50090855314915    | 0.0707883108423024 |
| cg05702927      | 2  | 204206071 | ABI2;ABI2;ABI2;ABI2                               | -0.105763  | -0.245126577572922  | 0.0710937980996139 |
| cg24647363      | 6  | 143857972 |                                                   | 0.0167026  | 0.581030736889269   | 0.0710967962909368 |

|                 |    |           |                                                                 |             |                      |                    |
|-----------------|----|-----------|-----------------------------------------------------------------|-------------|----------------------|--------------------|
| cg13064658      | 1  | 212003989 | LPGAT1;LPGAT1                                                   | 0.0399179   | 0.458487850163733    | 0.0710967962909368 |
| cg01353139      | 8  | 124170018 |                                                                 | 0.0126148   | 0.457718374402177    | 0.0710967962909368 |
| cg23397741      | 17 | 35014588  |                                                                 | 0.0185459   | 0.587545312586327    | 0.0710967962909368 |
| cg25249300      | 2  | 54483341  | TSPYL6;ACYP2;TSPYL6                                             | -0.00474265 | -0.00696604941619033 | 0.0710967962909368 |
| cg23007574      | 19 | 41942070  | ATP5SL;ATP5SL;ATP5SL;ATP5SL;ATP5SL;ATP5SL                       | -0.0405207  | -0.065797802796558   | 0.0710967962909368 |
| cg26286479      | 12 | 69924501  | FRS2;FRS2;FRS2;FRS2;FRS2;FRS2;FRS2                              | -0.0273228  | -0.0412442757846175  | 0.0710967962909368 |
| cg01101619      | 6  | 4088409   | C6orf201;C6orf201;C6orf201                                      | -0.0143423  | -0.021267353945835   | 0.0710967962909368 |
| cg23651826      | 11 | 115630531 |                                                                 | 0.0416057   | 0.422629237706695    | 0.0710967962909368 |
| cg15890173      | 5  | 74532862  | ANKRD31                                                         | 0.0111636   | 0.574711398765725    | 0.0710967962909368 |
| cg01646610      | 19 | 19976784  | ZNF253;ZNF253                                                   | 0.0128517   | 0.410537691341028    | 0.0710967962909368 |
| cg06417885      | 8  | 47108318  |                                                                 | -0.0566014  | -0.102898923125476   | 0.0710967962909368 |
| cg02943305      | 7  | 31685368  | CCDC129                                                         | -0.141898   | -0.395620139514931   | 0.0710967962909368 |
| cg12323760      | 1  | 40544720  | PPT1;PPT1                                                       | -0.0850975  | -0.170418438040574   | 0.0710967962909368 |
| cg19987349      | 8  | 98993142  | MATN2;MATN2                                                     | -0.0975016  | -0.191523726875244   | 0.0710967962909368 |
| cg16788538      | 7  | 72972107  | BCL7B                                                           | 0.0193403   | 0.763440749226576    | 0.0710967962909368 |
| cg20460852      | 8  | 23082822  | TNFRSF10A                                                       | 0.0382863   | 0.92579980607176     | 0.0710967962909368 |
| cg09852920      | 17 | 48277216  | COL1A1                                                          | 0.0343744   | 1.246041867203036    | 0.0710967962909368 |
| cg24576206      | 22 | 25866846  |                                                                 | -0.0273912  | -0.0427719208511121  | 0.0710967962909368 |
| cg14704270      | 22 | 50639024  | SELO                                                            | 0.0468055   | 0.609815783590264    | 0.0710967962909368 |
| cg19966981      | 17 | 71564318  | SDK2                                                            | -0.0285985  | -0.0447280259990286  | 0.0710967962909368 |
| cg08358233      | 10 | 48634114  |                                                                 | -0.0403256  | -0.0654035967441556  | 0.0710967962909368 |
| cg06504337      | 12 | 123465174 | ARL6IP4;ARL6IP4;ARL6IP4;ARL6IP4;ARL6IP4;ARL6IP4;ARL6IP4;ARL6IP4 | 0.0156072   | 0.50672458117272     | 0.0710967962909368 |
| cg05525867      | 15 | 75661090  | MAN2C1                                                          | 0.0129362   | 0.881498550831165    | 0.0710967962909368 |
| cg20550383      | 14 | 104313914 | PPP1R13B;PPP1R13B;LINC00637                                     | 0.0265094   | 0.442720400816279    | 0.0710967962909368 |
| cg07751641      | 5  | 134826244 |                                                                 | 0.0231945   | 0.768016914339213    | 0.0710967962909368 |
| cg12001457      | 2  | 50163732  | NRXN1;NRXN1;NRXN1                                               | -0.0309652  | -0.0486108145441262  | 0.0710967962909368 |
| cg02717630      | 16 | 46865118  | C16orf87                                                        | 0.0245133   | 0.653203850732497    | 0.0710967962909368 |
| cg21076259      | 11 | 35161345  | CD44;CD44;CD44;CD44;CD44                                        | 0.00681637  | 0.34278417244506     | 0.0710967962909368 |
| cg00468356      | 7  | 138176808 | TRIM24;TRIM24                                                   | -0.0478337  | -0.076407949734727   | 0.0710967962909368 |
| cg20647962      | 15 | 41136443  | SPINT1;SPINT1;SPINT1                                            | 0.0228998   | 0.518989143876452    | 0.0710967962909368 |
| cg05302416      | 11 | 2466037   | KCNQ1                                                           | 0.0222925   | 0.525464821839923    | 0.0710967962909368 |
| cg23312248      | 12 | 123465515 | ARL6IP4;ARL6IP4;ARL6IP4;ARL6IP4                                 | 0.0196383   | 0.550765504113736    | 0.0710967962909368 |
| cg00460807      | 3  | 45731126  | SACM1L                                                          | 0.0237026   | 0.814695132381025    | 0.0710967962909368 |
| cg17448575      | 15 | 40762993  | CHST14                                                          | 0.01404     | 0.659883871397479    | 0.0710967962909368 |
| cg06635202      | 2  | 8165386   |                                                                 | -0.0114457  | -0.0170251061642496  | 0.0710967962909368 |
| cg26157020      | 9  | 129240339 | MVB12B                                                          | -0.0514936  | -0.0915200037484988  | 0.0710967962909368 |
| cg09092901      | 2  | 33049964  | LINC00486                                                       | -0.0637822  | -0.126158582804558   | 0.0712834664990888 |
| cg12271759      | 2  | 40468548  | SLC8A1;SLC8A1;SLC8A1;SLC8A1                                     | -0.0484016  | -0.0835981617290261  | 0.0713479161220902 |
| cg22355691      | 19 | 12739144  | ZNF791                                                          | -0.080166   | -0.141131684732491   | 0.0713479161220902 |
| ch.7.109945386F | 7  | 110158150 |                                                                 | 0.0265003   | 0.470969512103851    | 0.0713985471131724 |
| cg07102665      | 20 | 6210894   |                                                                 | -0.0345425  | -0.0564080811319779  | 0.0714921875435001 |
| cg12214665      | 6  | 138188557 | TNFAIP3                                                         | 0.0175645   | 0.75515702796533     | 0.0714921875435001 |
| cg24934063      | 7  | 121944173 | FEZF1;FEZF1                                                     | 0.0230515   | 0.339876855722695    | 0.0714921875435001 |
| cg17307811      | 19 | 55916316  | UBE2S                                                           | -0.074769   | -0.144346715519751   | 0.0714921875435001 |
| cg07136338      | 17 | 33814819  | SLFN12L                                                         | 0.0115719   | 0.481347394944446    | 0.0715237813221254 |
| cg20136584      | 1  | 204121503 | ETNK2                                                           | 0.00865915  | 0.384808611562647    | 0.0715237813221254 |
| cg02921604      | 19 | 54297098  | NLRP12;NLRP12                                                   | -0.0471388  | -0.0812222112422541  | 0.0715237813221254 |
| cg04878489      | 6  | 43139942  | SRF;SRF                                                         | 0.0278975   | 0.534637696434597    | 0.0715237813221254 |
| cg24238564      | 11 | 65779343  | CST6                                                            | 0.0288897   | 0.683123740502286    | 0.0715237813221254 |
| cg09881019      | 19 | 45250987  | BCL3                                                            | 0.0463173   | 0.31663038254275     | 0.0715237813221254 |
| cg02507889      | 18 | 76754902  | SALL3                                                           | -0.0372495  | -0.0631329553847701  | 0.0715237813221254 |
| ch.3.52786R     | 3  | 3083388   | CNTN4;CNTN4;CNTN4                                               | 0.0180971   | 0.27026268553803     | 0.0715371904069492 |
| cg04576025      | 5  | 1386550   |                                                                 | 0.033262    | 1.15653768039061     | 0.0715371904069492 |
| cg25048344      | 2  | 119914337 | C1QL2                                                           | 0.0125769   | 0.504910956654604    | 0.0717463943073639 |
| cg22834172      | 17 | 3774349   |                                                                 | 0.0163155   | 0.593830610405995    | 0.0718102503016278 |
| cg09395034      | 5  | 137801102 | EGR1                                                            | 0.0180389   | 0.533305832294327    | 0.0718102503016278 |
| cg24516890      | 3  | 133293153 | CDV3;CDV3;CDV3                                                  | 0.0108353   | 0.44412567797567     | 0.0718102503016278 |
| cg02556655      | 11 | 63975026  | FERMT3;FERMT3                                                   | 0.00906978  | 0.608737539697052    | 0.0718102503016278 |
| ch.19.683370F   | 19 | 16239180  | RAB8A                                                           | 0.0280189   | 0.736434564972849    | 0.0718102503016278 |
| cg04379122      | 10 | 130119293 |                                                                 | -0.0620698  | -0.113905236184627   | 0.0718258046962064 |
| cg26147668      | 7  | 130081239 | TSGA14                                                          | -0.0579189  | -0.712952847408517   | 0.0718583329213108 |
| cg03814148      | 4  | 113223849 | ALPK1;ALPK1;ALPK1                                               | 0.0273369   | 0.0467306891009954   | 0.07186224295106   |
| cg20972078      | 2  | 230320638 | DNER                                                            | -0.0272535  | -0.0418448546247008  | 0.07186224295106   |
| cg21950196      | 1  | 228327428 | GUK1;GUK1                                                       | 0.0395742   | 0.227793729206285    | 0.07186224295106   |
| cg02938205      | 3  | 49236810  | CCDC36;CCDC36                                                   | 0.0442754   | 0.644631019865415    | 0.07186224295106   |
| cg20110633      | 19 | 44302906  | LYPD5;LYPD5                                                     | 0.0342252   | 0.793044937296685    | 0.07186224295106   |
| cg21367769      | 6  | 25651194  | SCGN                                                            | -0.0851737  | -0.149802438405562   | 0.07186224295106   |
| cg09658066      | 6  | 35995354  | MAPK14;MAPK14;MAPK14;MAPK14                                     | 0.0360564   | 0.473860385010342    | 0.07186224295106   |
| cg18936327      | 1  | 161060281 | PVRL4                                                           | 0.00744137  | 0.0111276950891701   | 0.07186224295106   |
| cg08740284      | 15 | 40987165  | RAD51;RAD51-AS1;RAD51;RAD51;RAD51                               | 0.0180624   | 0.412864197071407    | 0.07186224295106   |
| cg26042512      | 8  | 19117049  |                                                                 | -0.0131378  | -0.0196819639656028  | 0.07186224295106   |
| cg09238470      | 16 | 30007069  | HIRIP3;INO80E;HIRIP3                                            | 0.0073575   | 0.678950745155611    | 0.071963909760912  |
| cg21992350      | 6  | 80657193  | ELOVL4;ELOVL4                                                   | 0.0136586   | 0.486493151065684    | 0.0720342832593362 |
| cg10756051      | 2  | 198365397 | HSPD1;HSPE1;HSPD1                                               | 0.00447031  | 0.3114214703404      | 0.0720342832593362 |
| cg24564491      | 21 | 46238804  | SUMO3                                                           | -0.0305167  | -0.048997573400001   | 0.0720842714624691 |
| cg25081106      | 13 | 88324169  | SLITRK5                                                         | 0.0127584   | 0.354432339424024    | 0.0720842714624691 |
| cg10929299      | 14 | 50334860  |                                                                 | 0.017405    | 0.562864116006389    | 0.0720842714624691 |
| cg26069562      | 6  | 29691981  | HLA-F;HLA-F;HLA-F                                               | 0.00573482  | 0.371291452738891    | 0.0720842714624691 |
| cg09653046      | 4  | 129730880 | JADE1;JADE1;JADE1;JADE1;JADE1;JADE1                             | 0.0125111   | 0.564271259606026    | 0.0720842714624691 |
| cg09209510      | 14 | 100288389 | EML1;EML1                                                       | 0.0066749   | 0.327161209201973    | 0.0720842714624691 |
| cg03987003      | 1  | 145516092 | GNRHRR2;PEX11B                                                  | 0.0378882   | 0.470087096683984    | 0.0720842714624691 |
| cg22802174      | 1  | 40995949  | ZNF684                                                          | -0.0626622  | -0.13696457120092    | 0.0721278245126002 |



|            |    |           |                                                     |             |                      |                    |
|------------|----|-----------|-----------------------------------------------------|-------------|----------------------|--------------------|
| cg21088281 | 4  | 176922637 | GPM6A;GPM6A                                         | 0.0111784   | 0.614874537214264    | 0.0732545130155182 |
| cg15399785 | 17 | 17942665  | ATPAF2;C17orf39;C17orf39                            | 0.0165913   | 0.674600619285679    | 0.073275557879141  |
| cg15770599 | 3  | 32547795  |                                                     | -0.0291722  | -0.0449016258515672  | 0.073275557879141  |
| cg17963944 | 7  | 100303258 | POP7                                                | 0.00861145  | 0.470644104852912    | 0.073275557879141  |
| cg14569576 | 9  | 102585669 | NR4A3;NR4A3;NR4A3                                   | -0.002159   | -0.243939887523546   | 0.073275557879141  |
| cg12786012 | 1  | 12602511  |                                                     | -0.00578504 | -0.00852965288731592 | 0.073275557879141  |
| cg13943052 | 15 | 40987167  | RAD51;RAD51;RAD51;RAD51                             | 0.0173292   | 0.65896883358755     | 0.073275557879141  |
| cg03695166 | 10 | 5506703   |                                                     | -0.0641452  | -0.105071671150702   | 0.073275557879141  |
| cg16053580 | 19 | 51568863  | KLK13                                               | 0.0424951   | 0.350104553926719    | 0.073275557879141  |
| cg21137022 | 6  | 52853558  | GSTA4                                               | -0.00330473 | -0.00483685796856592 | 0.073275557879141  |
| cg15918766 | 12 | 53662405  | ESPL1                                               | 0.00947461  | 0.450505904913095    | 0.073275557879141  |
| cg06789519 | 13 | 112553904 |                                                     | -0.0379296  | -0.0617967114434863  | 0.073275557879141  |
| cg24950571 | 5  | 10441620  | ROPN1L                                              | 0.00438426  | 0.339841760756228    | 0.073275557879141  |
| cg16684608 | 1  | 153758749 |                                                     | -0.111914   | -0.192213608200201   | 0.073275557879141  |
| cg05470082 | 5  | 131832498 |                                                     | 0.00870513  | 0.601049437127525    | 0.073275557879141  |
| cg16200007 | 2  | 105946567 | TGFBRAP1;TGFBRAP1                                   | 0.016813    | 0.811772131085856    | 0.073275557879141  |
| cg24272452 | 20 | 49322897  |                                                     | -0.0429821  | -0.0735930270257855  | 0.073275557879141  |
| cg17832605 | 3  | 160048980 | IFT80;IFT80;IFT80                                   | -0.0238086  | -0.0366451770593985  | 0.073275557879141  |
| cg16665383 | 8  | 96258496  | C8orf37                                             | -0.0967727  | -0.181751470190903   | 0.073275557879141  |
| cg22715837 | 7  | 113723162 |                                                     | 0.0195818   | 0.525772515948703    | 0.073275557879141  |
| cg01531665 | 9  | 33473681  | NOL6;SUGT1P1;NOL6                                   | 0.00642468  | 0.454611960324654    | 0.073275557879141  |
| cg26971783 | 15 | 77857997  |                                                     | 0.0133356   | 0.0201576845896764   | 0.0732810414830824 |
| cg17120588 | 5  | 159911089 | MIR146A                                             | -0.0407049  | -0.0665266563146791  | 0.0732810414830824 |
| cg27084712 | 3  | 42977845  |                                                     | -0.0651541  | -0.117182202032663   | 0.0733074210941224 |
| cg17611765 | 17 | 46703945  | HOXB9                                               | 0.0132047   | 0.762227948802435    | 0.0733528094360592 |
| cg04283882 | 4  | 923631    | TMEM175;GAK                                         | 0.00470444  | 0.548131803720666    | 0.0733728185261988 |
| cg05545777 | 5  | 101119128 |                                                     | 0.0916585   | 0.310083339000172    | 0.0733728185261988 |
| cg24098561 | 5  | 175197036 |                                                     | -0.0498247  | -0.0869765533745052  | 0.0733728185261988 |
| cg24713343 | 1  | 52082692  | OSBPL9;OSBPL9;OSBPL9;OSBPL9                         | 0.0333671   | 0.64784972129524     | 0.0733824346145668 |
| cg06058597 | 2  | 10829993  | NOL10;NOL10                                         | 0.0106776   | 0.376852434450034    | 0.0733824346145668 |
| cg22473973 | 10 | 133794911 | BNIP3                                               | 0.0118976   | 0.436833725667046    | 0.0733824346145668 |
| cg01616682 | 11 | 15095017  | CALCB                                               | 0.0420689   | 0.356224709927024    | 0.0733824346145668 |
| cg08714389 | 14 | 81398052  | CEP128                                              | -0.0247696  | -0.0396098929022929  | 0.0733824346145668 |
| cg01349853 | 3  | 36986697  | TRANK1                                              | 0.0177039   | 0.847360081601727    | 0.0733824346145668 |
| cg17161202 | 8  | 141903388 | PTK2;PTK2;PTK2                                      | -0.0721124  | -0.163548539544455   | 0.0733824346145668 |
| cg22986271 | 3  | 45730975  | SACM1L                                              | 0.0301621   | 0.867267816055615    | 0.0734657106065612 |
| cg15057214 | 11 | 74699344  | NEU3                                                | -0.0718668  | -0.140826162963607   | 0.0734917443124597 |
| cg20979061 | 19 | 49939949  | SLC17A7                                             | 0.0365767   | 0.205181323657187    | 0.0735585772557059 |
| cg16078523 | 3  | 50738135  | DOCK3                                               | -0.138944   | -0.296945654395322   | 0.0735585772557059 |
| cg19091715 | 1  | 203562914 |                                                     | -0.0726869  | -0.156317004885373   | 0.0735699070566771 |
| cg02512267 | 5  | 43120873  | ZNF131;ZNF131;ZNF131;ZNF131                         | 0.00857932  | 0.606880134991808    | 0.0735699070566771 |
| cg17564183 | 6  | 28888885  | TRIM27                                              | -0.016894   | -0.0257586698676802  | 0.0735699070566771 |
| cg00472445 | 6  | 101329307 | ASCC3;ASCC3                                         | 0.0260532   | 0.654975508720795    | 0.0735699070566771 |
| cg08757142 | 12 | 66036823  | LOC100507065;LOC100507065;LOC100507065;LOC100507065 | -0.0844032  | -0.147076018706001   | 0.0735699070566771 |
| cg19062489 | 19 | 15662114  | CYP4F22                                             | 0.0276827   | 0.68007368842487     | 0.0735699070566771 |
| cg14741153 | 10 | 95753348  | PLCE1                                               | -0.0265626  | -0.243599721873226   | 0.0735699070566771 |
| cg04238274 | 7  | 53879377  |                                                     | -0.040327   | -0.063807878438462   | 0.0735699070566771 |
| cg15502903 | 22 | 17566297  | IL17RA                                              | 0.0126083   | 0.57883095675992     | 0.0735699070566771 |
| cg22513166 | 1  | 212476869 | PPP2R5A;PPP2R5A                                     | -0.108318   | -0.370883902373074   | 0.0735699070566771 |
| cg25205329 | 19 | 2329794   | LSM7;SPL2B;SPL2B                                    | 0.010831    | 0.0169515705720327   | 0.0735699070566771 |
| cg17606996 | 2  | 171572472 | LINC01124;LOC101926913;SP5                          | 0.0229161   | 0.569721186371671    | 0.0735699070566771 |
| cg15702823 | 6  | 10838819  |                                                     | 0.00976837  | 0.563857060787114    | 0.0735699070566771 |
| cg18826743 | 17 | 36900631  | PCGF2                                               | -0.0640902  | -0.114667050645599   | 0.0738424746781187 |
| cg18022777 | 2  | 30144651  | ALK                                                 | 0.0285807   | 0.9706065462989      | 0.0738424746781187 |
| cg10502508 | 14 | 76449243  | TGFB3                                               | 0.0122813   | 0.518661722681612    | 0.0738424746781187 |
| cg00349599 | 17 | 17184369  | COFS3                                               | 0.00889579  | 0.521820983130728    | 0.0738424746781187 |
| cg13118536 | 22 | 41215559  | SLC25A17                                            | 0.02125     | 0.386600328779085    | 0.0738424746781187 |
| cg00056074 | 2  | 131485150 |                                                     | 0.017004    | 0.396855358164782    | 0.0738424746781187 |
| cg01296482 | 15 | 45798233  | SLC30A4                                             | -0.0402978  | -0.0646620529428543  | 0.0738424746781187 |
| cg04757074 | 12 | 67663012  | CAND1                                               | 0.0084058   | 0.571302276420937    | 0.0738424746781187 |
| cg26827737 | 2  | 37552543  |                                                     | 0.00426063  | 0.338862080998804    | 0.0738424746781187 |
| cg14988142 | 1  | 229643771 | NUP133                                              | 0.0145632   | 0.583670809957699    | 0.0739018872965345 |
| cg12133425 | 1  | 247494926 | ZNF496;ZNF496                                       | 0.0232422   | 0.920229955214448    | 0.0740119959070531 |
| cg13742532 | 3  | 42850848  | CCBP2                                               | -0.0780698  | -0.148101619468772   | 0.0742315942615147 |
| cg18036763 | 22 | 45404910  | PHF21B;PHF21B                                       | 0.0912877   | 1.23484815522732     | 0.0743398242742805 |
| cg21229979 | 6  | 163746175 | LOC285796                                           | 0.035585    | 0.427482102334717    | 0.0743398242742805 |
| cg07547404 | 15 | 40933758  | CASC5;CASC5                                         | -0.0746965  | -0.141933045135935   | 0.0744442726833354 |
| cg21839284 | 1  | 54359146  | DIO1;DIO1;DIO1;DIO1                                 | -0.0893469  | -0.175698796351187   | 0.0744442726833354 |
| cg04227633 | 14 | 102904606 | TECPR2                                              | 0.0114708   | 0.371074591415766    | 0.0744442726833354 |
| cg18637847 | 3  | 193788929 |                                                     | 0.0141369   | 0.472777387821475    | 0.0745809265647803 |
| cg22511564 | 16 | 46809514  |                                                     | -0.0501296  | -0.0858270710166308  | 0.0745809265647803 |
| cg14638209 | 2  | 10260280  |                                                     | 0.0143344   | 0.407945460866636    | 0.0745809265647803 |
| cg17069349 | 3  | 52311846  | WDR82                                               | 0.0192973   | 0.750073381538996    | 0.0745809265647803 |
| cg01558923 | 1  | 218520959 | TGFB2;TGFB2                                         | 0.027688    | 0.632747607287817    | 0.0746165544993359 |
| cg25833238 | 6  | 153304325 | FBXO5;FBXO5                                         | 0.0157177   | 0.748996416941287    | 0.0746165544993359 |
| cg11116013 | 10 | 134973794 | KNDC1                                               | 0.0450674   | 0.56499622849691     | 0.0746212954715123 |
| cg14145635 | 6  | 20201350  | MBOAT1;MBOAT1                                       | -0.0228471  | -0.035354972196629   | 0.0746212954715123 |
| cg23058863 | 14 | 24610866  | FAM158A                                             | 0.0113813   | 0.676945120390387    | 0.0746212954715123 |
| cg02489006 | 11 | 47207577  | PACSL1;PACSL1;PACSL1                                | 0.00823268  | 0.349047386692095    | 0.0746212954715123 |
| cg14817448 | 3  | 125069389 | ZNF148                                              | -0.0993099  | -0.203030240399723   | 0.0746212954715123 |
| cg01202012 | 22 | 47248847  | TBC1D22A;TBC1D22A;TBC1D22A;TBC1D22A;TBC1D22A        | 0.0129057   | 0.0205757380806188   | 0.0746212954715123 |
| cg14346123 | 10 | 5237038   |                                                     | -0.042959   | -0.0743438320866207  | 0.0746502722943117 |





|            |    |           |                                                  |            |                     |                    |
|------------|----|-----------|--------------------------------------------------|------------|---------------------|--------------------|
| cg03237412 | 15 | 44069622  | ELL3                                             | 0.0262035  | 0.647874380979218   | 0.0756885304971628 |
| cg00952573 | 6  | 18210046  | KDM1B                                            | -0.0918092 | -0.207831174137925  | 0.0756885304971628 |
| cg05802477 | 12 | 132629385 | DDX51;NOC4L                                      | 0.010836   | 0.635672609611886   | 0.0757385158533335 |
| cg17943520 | 21 | 40817850  | MIR6508;SH3BGR;SH3BGR                            | 0.018551   | 0.488564710205008   | 0.0757556832333133 |
| cg14572091 | 9  | 136537981 | SARDH;SARDH                                      | -0.0175285 | -0.026266034661009  | 0.0758034296655427 |
| cg17854641 | 19 | 51126772  | SYT3;SYT3;SYT3                                   | -0.0472783 | -0.0804008451853602 | 0.075888486798537  |
| cg02815282 | 11 | 67141135  | LOC100130987;CLCF1;CLCF1;CLCF1                   | 0.0178197  | 1.43328264323462    | 0.075888486798537  |
| cg00282877 | 10 | 135265980 | LOC619207                                        | -0.0642984 | -0.121002811994715  | 0.075888486798537  |
| cg02598978 | 16 | 20817844  | LOC81691;ER12;LOC81691;LOC81691;ER12;LOC81691    | 0.0260396  | 0.690361716953546   | 0.075888486798537  |
| cg15470309 | 16 | 80905554  | PRCAT47;PRCAT47                                  | -0.0444787 | -0.0793091374810189 | 0.075888486798537  |
| cg23968650 | 6  | 114384629 | HS3ST5                                           | -0.0757027 | -0.151206897026386  | 0.075888486798537  |
| cg13022888 | 14 | 82000246  | SEL1L                                            | 0.0294086  | 0.411604347564561   | 0.075888486798537  |
| cg25597760 | 17 | 77766120  |                                                  | 0.021415   | 0.375460438139725   | 0.075888486798537  |
| cg19934703 | 1  | 17332367  | ATP13A2;ATP13A2;ATP13A2                          | -0.06279   | -0.117710129042877  | 0.075888486798537  |
| cg05237745 | 3  | 187431255 | LOC100131635                                     | -0.0244657 | -0.037643014706826  | 0.075888486798537  |
| cg23095642 | 1  | 52081938  | OSBPL9;OSBPL9;OSBPL9;OSBPL9;OSBPL9               | -0.0537599 | -0.0854291092323883 | 0.075888486798537  |
| cg01008057 | 7  | 79764881  | GNAI1;GNAI1                                      | 0.0208374  | 0.760766262367257   | 0.075888486798537  |
| cg14864519 | 15 | 38991650  | C15orf53                                         | 0.00617138 | 0.00911201604636388 | 0.075888486798537  |
| cg27001137 | 13 | 113455344 | ATP11A;ATP11A                                    | -0.0497961 | -0.0938665071382011 | 0.075888486798537  |
| cg18075930 | 7  | 30615805  |                                                  | -0.0519094 | -0.0948502241221929 | 0.075888486798537  |
| cg06338016 | 3  | 196218811 | RNF168                                           | 0.00941793 | 0.0142164023815485  | 0.075888486798537  |
| cg24964061 | 15 | 35264425  |                                                  | -0.0112683 | -0.0168696931634793 | 0.075888486798537  |
| cg08531864 | 20 | 35841852  | RPN2;RPN2                                        | -0.0420355 | -0.0678725609763426 | 0.075888486798537  |
| cg03183872 | 20 | 3140552   | FASTKD5;UBOX5;UBOX5                              | 0.0482393  | 1.10409239918456    | 0.075888486798537  |
| cg11438280 | 2  | 219586076 | TLL4                                             | -0.0572163 | -0.0964238097927752 | 0.075888486798537  |
| cg12155930 | 12 | 49744981  | DNAJC22;DNAJC22                                  | -0.0216953 | -0.0330603608256133 | 0.075888486798537  |
| cg23302636 | 14 | 55281026  |                                                  | -0.0402833 | -0.0786929334414996 | 0.075888486798537  |
| cg00999623 | 1  | 108743186 | SLC25A24                                         | 0.0349881  | 0.845370993830586   | 0.075888486798537  |
| cg15543284 | 2  | 54785307  | SPTBN1;SPTBN1                                    | 0.0418953  | 0.726698194295663   | 0.075888486798537  |
| cg20105087 | 20 | 44524136  | PLTP;PLTP                                        | -0.0742497 | -0.157313102456712  | 0.075888486798537  |
| cg09597829 | 5  | 37575993  | WDR70                                            | -0.0952249 | -0.174137904514931  | 0.075888486798537  |
| cg08819256 | 2  | 129109442 |                                                  | -0.0470773 | -0.0914230053923309 | 0.075888486798537  |
| cg22397944 | 11 | 237014    | PSMD13;PSMD13;SIRT3;PSMD13;PSMD13;SIRT3          | 0.0455423  | 0.572372983232388   | 0.075888486798537  |
| cg23492789 | 2  | 72520940  | EXOC6B                                           | -0.0869898 | -0.148788696811393  | 0.075888486798537  |
| cg06930255 | 3  | 66344474  | SLC25A26;SLC25A26;SLC25A26                       | -0.067236  | -0.164163339872024  | 0.075888486798537  |
| cg18429863 | 8  | 73449684  | KCNB2;KCNB2                                      | 0.0152946  | 0.622081063322024   | 0.075888486798537  |
| cg26869617 | 16 | 2111094   | TSC2;TSC2;TSC2                                   | 0.0115196  | 0.0179366250626754  | 0.075888486798537  |
| cg11415852 | 10 | 97201765  | SORBS1;SORBS1;SORBS1;SORBS1;SORBS1;SORBS1;SORBS1 | -0.041328  | -0.0638874871852503 | 0.075888486798537  |
| cg25437757 | 8  | 42625222  | CHRNA6;CHRNA6                                    | -0.0790434 | -0.159418861657665  | 0.075888486798537  |
| cg04767484 | 15 | 76629104  | ISL2                                             | 0.0162562  | 0.0457612527498189  | 0.075888486798537  |
| cg00997411 | 1  | 205290916 | NUAK2                                            | 0.0279482  | 0.818731570439229   | 0.075888486798537  |
| cg10399696 | 17 | 80231560  | CSNK1D;CSNK1D;CSNK1D;CSNK1D                      | 0.014044   | 0.666091387263358   | 0.075888486798537  |
| cg08214808 | 11 | 45922166  | MAPK8IP1                                         | 0.0732335  | 0.531885409446455   | 0.075888486798537  |
| cg09266901 | 12 | 124118336 | EIF2B1;GTF2H3                                    | 0.0183754  | 0.484587810445005   | 0.075888486798537  |
| cg09097421 | 1  | 22815899  | ZBTB40;ZBTB40                                    | 0.0170758  | 0.0272517014672751  | 0.075888486798537  |
| cg05153861 | 7  | 100492700 | ACHE;ACHE                                        | 0.00625019 | 0.374105597606181   | 0.075888486798537  |
| cg13828397 | 11 | 121477655 | SORL1                                            | -0.0100293 | -0.0151373233804783 | 0.075888486798537  |
| cg03329500 | 22 | 44205978  | EFCAB6;EFCAB6                                    | -0.037208  | -0.0614065473468633 | 0.075888486798537  |
| cg07886529 | 2  | 232571463 |                                                  | 0.0180906  | 1.15168441922434    | 0.075888486798537  |
| cg17382214 | 12 | 110718450 | ATP2A2;ATP2A2                                    | 0.00886503 | 0.506962557480052   | 0.075888486798537  |
| cg16257101 | 14 | 58863000  | TOMM20L                                          | 0.0274577  | 0.496466964977716   | 0.075888486798537  |
| cg25938596 | 8  | 104240157 | BAALC;BAALC                                      | -0.0350689 | -0.0558100863946674 | 0.075888486798537  |
| cg07229135 | 19 | 28204254  |                                                  | -0.0760324 | -0.147098519101631  | 0.0758953027078097 |
| cg10093972 | 3  | 10436176  | MIR885;ATP2B2;ATP2B2                             | -0.0547184 | -0.0999564476108598 | 0.0759848099952965 |
| cg25996141 | 3  | 52211370  |                                                  | 0.0102592  | 0.0156466862734694  | 0.0759848099952965 |
| cg04887335 | 3  | 19604632  | TCTEX1D2                                         | 0.0523902  | 1.12780875352805    | 0.0761074931379137 |
| cg12632487 | 1  | 6786300   | LOC100505887;LOC100505887                        | 0.0694131  | 0.153704821572688   | 0.0761074931379137 |
| cg13604132 | 4  | 75023629  | MTHFD2L                                          | 0.0288134  | 0.665688359649744   | 0.0761817626240994 |
| cg0567972  | 6  | 7643349   |                                                  | -0.0558385 | -0.116273130293779  | 0.0764247335283911 |
| cg19014302 | 19 | 18303893  | MPV17L2                                          | 0.017302   | 1.143957215761      | 0.0764867033301317 |
| cg02899788 | 1  | 47133675  | ATPAF1;ATPAF1                                    | 0.0339228  | 0.484967994173029   | 0.0764888070110629 |
| cg19135230 | 8  | 103136319 | NCALD;NCALD;NCALD;NCALD;NCALD;NCALD              | 0.0131128  | 0.623402427242037   | 0.0764888070110629 |
| cg06319822 | 16 | 215960    | HBM                                              | 0.0155057  | 0.702651357092054   | 0.0764888070110629 |
| cg19926434 | 14 | 66975296  | GPHN;GPHN                                        | 0.0123239  | 0.709812483943524   | 0.0764888070110629 |
| cg13756059 | 17 | 40428538  | STAT5B                                           | 0.0150642  | 0.478647447556389   | 0.0764888070110629 |
| cg05207611 | 12 | 133333251 | ANKLE2                                           | -0.0459728 | -0.0760324          | 0.0764888070110629 |
| cg12590791 | 6  | 89931408  | GABRR1                                           | -0.0648996 | -0.119662774608763  | 0.0764888070110629 |
| cg04034539 | 11 | 62439802  | C11orf48;C11orf83                                | 0.0205209  | 0.707015026814927   | 0.0768853325894975 |
| cg00126575 | 10 | 25239164  | PRTFDC1;PRTFDC1                                  | -0.0391634 | -0.0612718411603119 | 0.0768940654202772 |
| cg08555160 | 16 | 69166339  | CHTF8;CHTF8;CIRH1A;CHTF8;CHTF8                   | 0.0330375  | 0.485129516499155   | 0.0769246609613108 |
| cg09193923 | 2  | 120517123 | PTPN4                                            | 0.00522305 | 0.53368522790142    | 0.0770055732749119 |
| cg0936689  | 9  | 134465556 | RAPGEF1;RAPGEF1;RAPGEF1                          | -0.0333449 | -0.0556013245465492 | 0.0770055732749119 |
| cg02944076 | 1  | 201778100 | NAV1;NAV1                                        | -0.0123592 | -0.0184253496280966 | 0.0770055732749119 |
| cg26279152 | 13 | 20356101  | PSPC1;PSPC1                                      | 0.0105757  | 0.873291414959141   | 0.0770055732749119 |
| cg08800530 | 5  | 175788722 | KIAA1191;KIAA1191;KIAA1191;KIAA1191;KIAA1191     | 0.0428534  | 1.30327385725631    | 0.0770055732749119 |
| cg24800930 | 14 | 24454176  | DHRS4L2;DHRS4L2;DHRS4L2                          | -0.026334  | -0.0406380690466567 | 0.0770055732749119 |
| cg15587693 | 2  | 239228886 | TRAF3IP1;TRAF3IP1                                | 0.0235185  | 0.78182622719076    | 0.0770055732749119 |
| cg21308809 | 17 | 61614347  | KCNH6;KCNH6                                      | -0.0542427 | -0.091125023885363  | 0.0770055732749119 |
| cg03974764 | 1  | 117009075 | LOC101929023;LOC101929023                        | 0.0181069  | 0.0291002295479343  | 0.0770055732749119 |
| cg01746873 | 13 | 113344027 | ATP11A;ATP11A                                    | 0.0239557  | 0.750188451763481   | 0.0770055732749119 |
| cg04018214 | 12 | 91572199  | DCN;DCN;DCN;DCN;DCN                              | -0.0160624 | -0.02416269148264   | 0.0770055732749119 |
| cg08114812 | 1  | 41445105  | CTPS;CTPS                                        | 0.0170671  | 0.513866830574932   | 0.0770055732749119 |

|            |    |           |                                                 |            |                     |                    |
|------------|----|-----------|-------------------------------------------------|------------|---------------------|--------------------|
| cg05643051 | 21 | 44527804  | U2AF1;U2AF1;U2AF1                               | 0.0287102  | 0.571914429003568   | 0.0770055732749119 |
| cg06890950 | 4  | 81382711  | C4orf22                                         | -0.0610376 | -0.12195559197837   | 0.0770055732749119 |
| cg09580409 | 4  | 183065519 | MGC45800                                        | 0.0461238  | 0.419984667521932   | 0.0770055732749119 |
| cg00127353 | 6  | 112210969 |                                                 | 0.00402094 | 0.00589907695292168 | 0.0770055732749119 |
| cg18610261 | 2  | 37899776  | CDC42EP3                                        | 0.0142557  | 0.447260325294555   | 0.0770142185851406 |
| cg27597069 | 6  | 37321822  | RNF8;RNF8;RNF8;RNF8                             | 0.0316649  | 0.925438729740042   | 0.0770227125661909 |
| cg03062417 | 8  | 67868321  | TCF24                                           | -0.0655636 | -0.13034872433949   | 0.0770227125661909 |
| cg11610739 | 17 | 40075306  | ACYL;ACYL                                       | 0.00778149 | 0.700042606292204   | 0.0770227125661909 |
| cg21843128 | 16 | 68678687  | CDH3;CDH3                                       | 0.0199446  | 0.653394040194136   | 0.077026756825532  |
| cg16466335 | 1  | 63833149  | ALG6                                            | 0.0188914  | 0.690282276550466   | 0.077026756825532  |
| cg21776419 | 5  | 81118892  |                                                 | -0.0513556 | -0.112652699367612  | 0.077026756825532  |
| cg02750935 | 5  | 145214981 | PRELID2;PRELID2;PRELID2                         | 0.0133849  | 0.575080878160511   | 0.0770562797754422 |
| cg14707886 | 3  | 98577791  | DCBLD2                                          | -0.0429132 | -0.0699856645251101 | 0.0770581122415928 |
| cg16430332 | 2  | 61389173  | C2orf74;C2orf74                                 | 0.0132615  | 0.0203199499364874  | 0.0771642703234815 |
| cg03738868 | 7  | 100281714 | GIGYF1                                          | -0.0111004 | -0.0164559385831764 | 0.0772004263667292 |
| cg06105778 | 5  | 176830667 | F12                                             | 0.0107909  | 0.740659466061409   | 0.0772004263667292 |
| cg20053381 | 2  | 220363572 | GMPPA;GMPPA                                     | 0.0184216  | 0.881978597748727   | 0.0773401707744442 |
| cg04434653 | 18 | 33767451  | MOCOS                                           | 0.0350972  | 0.640011381850165   | 0.0774574731309749 |
| cg17937222 | 12 | 122018562 | KDM2B;KDM2B                                     | 0.0193272  | 0.709474067259993   | 0.0776658803867226 |
| cg13101398 | 20 | 52824678  | PFND4                                           | 0.0177348  | 0.567780754706201   | 0.0776763358570821 |
| cg01274995 | 1  | 165472019 | LOC400794                                       | -0.0545205 | -0.10022877076769   | 0.0777016245513136 |
| cg00869249 | 10 | 977800    | LOC101927762;LARP4B                             | 0.0432619  | 0.650184567677418   | 0.0777055549405616 |
| cg23834228 | 11 | 73358657  | PLEKHB1;PLEKHB1;PLEKHB1;PLEKHB1;PLEKHB1;PLEKHB1 | 0.010479   | 0.470217542789991   | 0.0778333043404734 |
| cg02874321 | 11 | 94166952  | MRE11A;MRE11A                                   | -0.082463  | -0.163455340521004  | 0.0778333043404734 |
| cg26533397 | 19 | 52795316  | ZNF766                                          | -0.0488359 | -0.0849739997187733 | 0.0778681764554711 |
| cg08528519 | 14 | 100659610 |                                                 | 0.0140224  | 0.39574331500791    | 0.0778681764554711 |
| cg02096656 | 7  | 139025181 | C7orf55                                         | 0.0332052  | 0.457200787665835   | 0.0778681764554711 |
| cg00210204 | 6  | 10748101  | TMEM14B;TMEM14B;TMEM14B;TMEM14B                 | 0.01251    | 0.793406605089158   | 0.0778681764554711 |
| cg12244205 | 6  | 28972937  | ZNF311;ZNF311                                   | -0.0690689 | -0.157027140339232  | 0.0778681764554711 |
| cg17745339 | 5  | 176755199 |                                                 | -0.0573554 | -0.10862509194907   | 0.0778681764554711 |
| cg02587124 | 6  | 34626797  | C6orf106;C6orf106                               | -0.0413863 | -0.0673474763606805 | 0.0778681764554711 |
| cg23961333 | 1  | 55516078  | PCSK9;PCSK9                                     | 0.0131578  | 0.0198011441040823  | 0.0778681764554711 |
| cg09986736 | 11 | 10472465  | AMPD3;AMPD3                                     | 0.0336545  | 0.407408384366914   | 0.0778681764554711 |
| cg13884288 | 22 | 38004832  | GGA1;GGA1;GGA1;GGA1;GGA1;GGA1                   | 0.0170738  | 0.681256806316826   | 0.0778681764554711 |
| cg07990044 | 5  | 77590720  | AP3B1;AP3B1                                     | 0.0107717  | 0.591650936487104   | 0.0778681764554711 |
| cg11640907 | 14 | 91757787  | CCDC88C                                         | 0.00724173 | 0.0108226435116735  | 0.0779211342335577 |
| cg25133211 | 6  | 31928014  | RDBP;SKIV2L                                     | -0.0380219 | -0.0610434541103606 | 0.0779373069687235 |
| cg02807377 | 4  | 141567436 | TBC1D9                                          | -0.0658051 | -0.131476475256683  | 0.0779373069687235 |
| cg05817661 | 11 | 93517837  | MED17                                           | 0.00588516 | 0.361937289822334   | 0.0779373069687235 |
| cg19755108 | 5  | 176434079 | UIMC1                                           | 0.0729241  | 0.179335187632181   | 0.077955282178589  |
| cg17129645 | 2  | 26395833  | FAM59B                                          | 0.01818    | 0.682580824334352   | 0.077955282178589  |
| cg13036971 | 20 | 31319259  | COMMD7;COMMD7                                   | -0.0283238 | -0.0440287251716169 | 0.077955282178589  |
| cg06623486 | 1  | 162531613 | UAP1                                            | 0.0261192  | 0.61842826197214    | 0.077955282178589  |
| cg21387238 | 1  | 155829263 | SYT11                                           | 0.0325426  | 1.14841513998409    | 0.077955282178589  |
| cg14527983 | 20 | 44562104  | PCIF1                                           | 0.00214782 | 0.0031369797974909  | 0.077955282178589  |
| cg11022537 | 4  | 177738806 |                                                 | -0.0537389 | -0.0871647564100362 | 0.077955282178589  |
| cg06886078 | 10 | 126480477 | METTL10                                         | 0.0107832  | 0.545117766650757   | 0.0779679144360258 |
| cg20553782 | 10 | 104403435 | TRIM8                                           | 0.0109447  | 0.659825303650099   | 0.0779679144360258 |
| cg10987882 | 20 | 3996459   | RNF24;RNF24;RNF24                               | 0.0351098  | 0.245131037464273   | 0.0779679144360258 |
| cg01011432 | 20 | 60982814  | CABLES2                                         | 0.0149063  | 0.589786825061271   | 0.0779679144360258 |
| cg06027057 | 14 | 90849959  |                                                 | 0.0170903  | 0.525278452671243   | 0.0779679144360258 |
| cg18272878 | 9  | 128510407 | PBX3;PBX3;PBX3;PBX3                             | 0.021442   | 0.664828786431924   | 0.0779679144360258 |
| cg25007781 | 14 | 105963610 | C14orf80;C14orf80;C14orf80                      | 0.00485859 | 0.00711104432922571 | 0.0779679144360258 |
| cg12364031 | 7  | 20692147  | ABCB5;ABCB5;ABCB5;ABCB5                         | -0.0593781 | -0.103137870396698  | 0.0779679144360258 |
| cg00966077 | 16 | 1401335   | C16orf42;GNPTG                                  | 0.0227214  | 0.844605630917246   | 0.0779679144360258 |
| cg24809382 | 15 | 55582033  | RAB27A                                          | 0.0122196  | 0.873167635448733   | 0.0779679144360258 |
| cg26612088 | 17 | 74722779  | JMJD6;C17orf95;JMJD6;JMJD6;JMJD6                | 0.0318187  | 0.968890282740137   | 0.0779679144360258 |
| cg04972341 | 11 | 72354329  | PDE2A;PDE2A;PDE2A;PDE2A                         | 0.0229062  | 0.455612158708333   | 0.0779679144360258 |
| cg19117777 | 5  | 109024969 | MAN2A1                                          | 0.0155011  | 0.44784432568597    | 0.0779679144360258 |
| cg17852224 | 22 | 51042761  | MAPK8IP2;MAPK8IP2                               | 0.03682    | 0.246170719149787   | 0.0779679144360258 |
| cg05557255 | 11 | 2422385   | TSSC4                                           | 0.0326657  | 0.953402478906351   | 0.0779679144360258 |
| cg04318006 | 8  | 121823643 | SNTB1                                           | 0.0194663  | 0.615689829271994   | 0.0779679144360258 |
| cg22827465 | 19 | 3094947   | GNA11                                           | 0.0285018  | 0.720802128595582   | 0.0779679144360258 |
| cg01555791 | 17 | 1012288   | ABR;ABR;ABR                                     | 0.0278374  | 0.667142697975841   | 0.0779679144360258 |
| cg11412876 | 6  | 112194702 | FYN                                             | 0.0427354  | 0.634835029452607   | 0.0779679144360258 |
| cg24470929 | 8  | 98791446  | LAPTM4B                                         | -0.0766258 | -0.161246681586487  | 0.0779679144360258 |
| cg08313638 | 10 | 12110577  | DHTKD1                                          | -0.0193658 | -0.585636306200596  | 0.0779679144360258 |
| cg21808250 | 12 | 133757947 | ZNF268;ZNF268;ZNF268;ZNF268;ZNF268;ZNF268       | 0.0209004  | 0.364251156560433   | 0.0779679144360258 |
| cg08791234 | 6  | 33267781  | TAPBP;TAPBP;RGL2;RGL2                           | 0.00719489 | 0.396597839304682   | 0.0779679144360258 |
| cg24182275 | 14 | 51297392  | NIN;NIN;NIN;NIN                                 | 0.0173344  | 0.819038685128838   | 0.0779679144360258 |
| cg21608489 | 19 | 42637137  | POU2F2                                          | 0.00677272 | 0.464202305658414   | 0.0779679144360258 |
| cg04878955 | 1  | 38100435  | RSPO1;RSPO1                                     | 0.0072355  | 0.331036376155198   | 0.0779679144360258 |
| cg23591039 | 1  | 225814239 | ENAH;ENAH                                       | -0.0274426 | -0.044506755492213  | 0.0779679144360258 |
| cg06579481 | 7  | 104621597 |                                                 | -0.110885  | -0.206738850457434  | 0.0779679144360258 |
| cg25764824 | 22 | 42085083  | NHP2L1;C22orf46                                 | 0.018311   | 0.843017946043869   | 0.0779679144360258 |
| cg09387970 | 11 | 55433005  | OR4C6                                           | -0.0489743 | -0.0779050557320132 | 0.0779679144360258 |
| cg14557534 | 3  | 27763581  | EOMES                                           | 0.0140722  | 0.558906980241942   | 0.0779679144360258 |
| cg07941301 | 6  | 42928277  | GNMT                                            | 0.014665   | 0.73975359627313    | 0.0779679144360258 |
| cg16888080 | 5  | 148676852 | AFAP1L1;AFAP1L1                                 | -0.0138306 | -0.0207394049665926 | 0.0779679144360258 |
| cg24796645 | 4  | 55745557  |                                                 | -0.0696119 | -0.120039053501163  | 0.0779679144360258 |
| cg09500317 | 16 | 23652388  | DCTN5;PALB2                                     | 0.0159826  | 0.523717806247088   | 0.0779679144360258 |
| cg17662034 | 8  | 74207518  | RDH10;RDH10                                     | 0.0376835  | 1.00461356477721    | 0.0779679144360258 |

|            |    |           |                                                            |             |                      |                    |
|------------|----|-----------|------------------------------------------------------------|-------------|----------------------|--------------------|
| cg14489346 | 4  | 81105371  | PRDM8                                                      | 0.0222412   | 0.439169178251065    | 0.0779679144360258 |
| cg04603176 | 11 | 118306465 | MLL                                                        | 0.0103841   | 0.424446369464991    | 0.0779679144360258 |
| cg14181092 | 5  | 122371896 | PPIC                                                       | 0.0128938   | 0.523142009931298    | 0.0779679144360258 |
| cg27569414 | 22 | 21161673  | P14KA                                                      | 0.0138763   | 0.0211349851914967   | 0.0779679144360258 |
| cg15645079 | 20 | 3140569   | FASTKD5;UBOX5;UBOX5                                        | 0.01528     | 0.826047658045068    | 0.0779679144360258 |
| cg23783653 | 6  | 27059850  |                                                            | 0.0432123   | 0.753776783978274    | 0.0779679144360258 |
| cg01317569 | 5  | 60140824  | ELOVL7;ELOVL7                                              | -0.0082492  | -0.0122946699637202  | 0.0779679144360258 |
| cg20902958 | 2  | 129075203 | HS6ST1                                                     | 0.00397394  | 0.283614687914955    | 0.0779679144360258 |
| cg19513374 | 6  | 28962971  | ZNF311                                                     | -0.0564522  | -0.09630504913515    | 0.0779679144360258 |
| cg11365360 | 3  | 184279509 | EPHB3                                                      | 0.0119941   | 0.595951889677285    | 0.0779679144360258 |
| cg22584339 | 13 | 49150952  |                                                            | -0.0381696  | -0.0609987147321446  | 0.0779679144360258 |
| cg25739700 | 17 | 5393371   | MIS12                                                      | -0.0549351  | -0.0963874478751384  | 0.0779679144360258 |
| cg10658459 | 5  | 72747197  |                                                            | 0.0116637   | 0.420211809598551    | 0.0779679144360258 |
| cg18017240 | 12 | 128365675 | FLJ37505                                                   | 0.0102307   | 0.015638590840714    | 0.0779679144360258 |
| cg05741182 | 16 | 72127884  | DHX38;TXNL4B;TXNL4B;DHX38;TXNL4B                           | 0.00455214  | 0.326587720679592    | 0.0779679144360258 |
| cg24210426 | 18 | 12780803  |                                                            | -0.0975362  | -0.19955352622268    | 0.0779679144360258 |
| cg05461270 | 6  | 28574608  |                                                            | -0.00831376 | -0.179528255978487   | 0.0779679144360258 |
| cg23287661 | 1  | 153395100 | S100A7A                                                    | 0.040805    | 0.389951123418937    | 0.0779679144360258 |
| cg13841901 | 1  | 45805975  | MUTYH;TOE1;MUTYH;MUTYH;MUTYH;MUTYH;MUTYH;MUTYH;MUTYH;MUTYH | 0.0247933   | 1.10478315963147     | 0.0779914655351465 |
| cg02346492 | 17 | 9143174   | NTN1                                                       | 0.0147546   | 0.522102659221528    | 0.0781084662956358 |
| cg22128985 | 1  | 2089384   | PRKCZ;PRKCZ;PRKCZ                                          | -0.0187564  | -0.0292889922549697  | 0.0781084662956358 |
| cg02373061 | 3  | 163021252 | LINC01192                                                  | -0.0533776  | -0.0894034233671449  | 0.0783140361858285 |
| cg02552216 | 4  | 184426031 | ING2                                                       | 0.0134721   | 0.477916985427039    | 0.0783191788051293 |
| cg13873127 | 2  | 201828507 | ORC2;ORC2                                                  | 0.00620225  | 0.388789506707314    | 0.0783501615562852 |
| cg12624667 | 3  | 36986555  | TRANK1                                                     | 0.00664564  | 0.897504376909005    | 0.0783624933302863 |
| cg19469297 | 7  | 45151440  | TBRG4;TBRG4;TBRG4                                          | 0.0145784   | 0.486289890977333    | 0.0783906349567055 |
| cg00163171 | 12 | 31963379  |                                                            | -0.0312553  | -0.0498049320890218  | 0.0783906349567055 |
| cg08478074 | 1  | 110613397 | ALX3                                                       | 0.00329828  | 0.288239942757898    | 0.0783906349567055 |
| cg07346676 | 11 | 60681596  | TMEM109;TMEM109                                            | 0.0245078   | 1.12724917314138     | 0.0783906349567055 |
| cg00577109 | 19 | 59074507  | MZF1;MZF1;LOC100131691                                     | 0.0195351   | 0.378048930516359    | 0.0783906349567055 |
| cg00379528 | 12 | 125350693 |                                                            | -0.0455496  | -0.0869801356010696  | 0.0783906349567055 |
| cg27563716 | 4  | 184365897 | CDKN2AIP;CDKN2AIP                                          | 0.0324755   | 0.55930726941796     | 0.0783906349567055 |
| cg00544901 | 19 | 49999417  | RPS11                                                      | 0.0259829   | 0.775176679739297    | 0.0783906349567055 |
| cg02668875 | 18 | 11147385  | FAM38B                                                     | 0.0684062   | 0.303240895053734    | 0.0783906349567055 |
| cg03314080 | 2  | 178129903 | NFE2L2;NFE2L2;NFE2L2                                       | 0.0188746   | 0.923118024763533    | 0.0783906349567055 |
| cg21445603 | 9  | 21503744  | MIR31HG                                                    | 0.00549546  | 0.00808899395358362  | 0.0783906349567055 |
| cg19136868 | 11 | 560685    | RASSF7;RASSF7;RASSF7;C11orf35                              | 0.0361161   | 0.747827395644983    | 0.0783906349567055 |
| cg06221861 | 7  | 100425075 | EPHB4;EPHB4                                                | 0.0418494   | 0.381844945246819    | 0.0783906349567055 |
| cg09686236 | 2  | 96011915  | KCNIP3;KCNIP3                                              | 0.0301674   | 0.769108130078009    | 0.0783906349567055 |
| cg26250870 | 19 | 22234980  | ZNF257                                                     | -0.0483168  | -0.0850881194791477  | 0.0783906349567055 |
| cg14943002 | 11 | 47256035  | DDB2                                                       | -0.0462022  | -0.0773595725356598  | 0.0783906349567055 |
| cg06962746 | 22 | 45016487  |                                                            | 0.0142392   | 0.730572382366572    | 0.0783906349567055 |
| cg15540144 | 2  | 99553141  | C2orf55                                                    | 0.0219742   | 0.341909934264476    | 0.0783906349567055 |
| cg24158363 | 17 | 73401717  | GRB2;GRB2;GRB2;GRB2                                        | 0.0512469   | 0.427509830198556    | 0.0783906349567055 |
| cg26535435 | 19 | 47290586  | SLC1A5;SLC1A5                                              | 0.0141981   | 0.586562133146478    | 0.0783906349567055 |
| cg24234117 | 13 | 32885661  | ZAR1L                                                      | 0.0552089   | 0.100895017764388    | 0.0783906349567055 |
| cg08774561 | 22 | 37263475  | NCF4;NCF4                                                  | 0.0134685   | 0.0283459773034113   | 0.0783906349567055 |
| cg23473955 | 17 | 27893407  | ABHD15                                                     | 0.00841892  | 0.669572456469529    | 0.0783906349567055 |
| cg01773831 | 3  | 156392830 | TIPARP;LOC100287227                                        | 0.00654589  | 0.484485043625883    | 0.0783906349567055 |
| cg08267442 | 15 | 91473386  | UNC45A                                                     | 0.0281057   | 0.658596895777448    | 0.0783906349567055 |
| cg25702652 | 2  | 164204628 |                                                            | -0.0357966  | -0.05849090110310146 | 0.0783906349567055 |
| cg09889194 | 4  | 7661729   | SORCS2                                                     | -0.0360977  | -0.0611009065055891  | 0.0783906349567055 |
| cg09708488 | 8  | 21882013  | NPM2                                                       | 0.015439    | 0.388516918074337    | 0.0783906349567055 |
| cg18682873 | 2  | 46769828  | RHOQ                                                       | 0.028759    | 0.601226587240533    | 0.078562303147328  |
| cg08436643 | 17 | 73257657  | MRPS7;GGA3;GGA3                                            | -0.0017369  | -0.266330491648832   | 0.078562303147328  |
| cg01017689 | 5  | 76376266  | SNORA47;ZBED3                                              | 0.00985278  | 0.0105544339779      | 0.078562303147328  |
| cg20338600 | 5  | 98110229  | RGMB                                                       | 0.0165507   | 0.495159183081476    | 0.078562303147328  |
| cg09985075 | 2  | 86743517  | CHMP3;CHMP3;CHMP3;CHMP3;RNF103-CHMP3                       | -0.0619459  | -0.102684744993809   | 0.078562303147328  |
| cg14905382 | 1  | 218055074 |                                                            | -0.0172627  | -0.025631464608287   | 0.0785792415349582 |
| cg10682850 | 16 | 26658168  |                                                            | -0.0294907  | -0.0470668538112292  | 0.0785974049806064 |
| cg14565835 | 1  | 174368960 | RABGAP1L                                                   | -0.0497699  | -0.093159034020641   | 0.0785974049806064 |
| cg03803784 | 12 | 51157550  | ATF1                                                       | 0.0352498   | 0.94485527628722     | 0.0786301045888898 |
| cg02746014 | 19 | 54959839  | LENG8-AS1;LENG8                                            | 0.010245    | 0.45825062966538     | 0.0786388456284924 |
| cg14863978 | 7  | 150864961 | GBX1                                                       | 0.0360057   | 0.226410458312565    | 0.0786388456284924 |
| cg17844160 | 5  | 53606416  | 15,00 ARL                                                  | 0.0280335   | 0.861369468057776    | 0.0786388456284924 |
| cg11980791 | 9  | 131084797 | COQ4;COQ4;TRUB2                                            | 0.0310773   | 1.28067330510208     | 0.0786388456284924 |
| cg19568834 | 20 | 34252926  | CPNE1;CPNE1;RBM12;CPNE1;CPNE1;CPNE1;RBM12;CPNE1;CPNE1      | 0.026093    | 1.01820884740127     | 0.0786388456284924 |
| cg05191454 | 6  | 42016435  | CCND3;CCND3;CCND3;CCND3                                    | 0.00974541  | 0.459266694401555    | 0.0786388456284924 |
| cg20955833 | 6  | 33980895  |                                                            | -0.0362687  | -0.0561949163204445  | 0.0786388456284924 |
| cg13878775 | 2  | 242041740 | MTERFD2;MTERFD2;MTERFD2;MTERFD2;MTERFD2                    | 0.0104004   | 0.394784412922534    | 0.0786388456284924 |
| cg26752655 | 20 | 23331282  | NXT1                                                       | 0.0117095   | 0.651738473525767    | 0.079005326842492  |
| cg15881168 | 17 | 28916490  | LRRC37BP1                                                  | -0.018459   | -0.0280238136055751  | 0.0790678959059095 |
| cg17354220 | 2  | 83743984  |                                                            | -0.0465061  | -0.143617915029186   | 0.0791485597184903 |
| cg04956944 | 2  | 112899297 | FBLN7;FBLN7                                                | -0.0192477  | -0.0291803842412299  | 0.0791485597184903 |
| cg24895834 | 10 | 6622425   | PRKQC                                                      | 0.0323071   | 0.776644642450465    | 0.0791485597184903 |
| cg14651518 | 3  | 50313693  | SEMA3B;SEMA3B                                              | 0.00719059  | 0.608810573714006    | 0.0791485597184903 |
| cg01495361 | 20 | 31369590  | DNMT3B;DNMT3B;DNMT3B;DNMT3B;DNMT3B;DNMT3B                  | -0.0551239  | -0.0887057845279697  | 0.0791485597184903 |
| cg24849789 | 12 | 57061323  | PTGES3;PTGES3;PTGES3;PTGES3;PTGES3;PTGES3                  | -0.0634105  | -0.109519033668125   | 0.0791485597184903 |
| cg11817804 | 7  | 36427191  | KIAA0895                                                   | -0.046376   | -0.0750686209006172  | 0.0791485597184903 |
| cg14844341 | 5  | 139089549 |                                                            | 0.00889431  | 0.442368499252963    | 0.0791485597184903 |
| cg26717786 | 17 | 79139685  | AATK;LOC388428                                             | 0.0315497   | 0.782095282846567    | 0.0791485597184903 |
| cg18451256 | 2  | 128284158 | IWS1                                                       | 0.0252153   | 1.12334150737653     | 0.0791485597184903 |

|            |    |            |                                                     |             |                     |                    |
|------------|----|------------|-----------------------------------------------------|-------------|---------------------|--------------------|
| cg18294715 | 7  | 71211027   |                                                     | -0.0724543  | -0.137806837508119  | 0.0791485597184903 |
| cg27497049 | 8  | 94712646   | FAM92A1                                             | 0.0304775   | 0.612069479495024   | 0.0793305813717542 |
| cg27150186 | 21 | 26979856   | MRPL39;MRPL39                                       | 0.0103836   | 0.480261893521552   | 0.0793305813717542 |
| cg06338429 | 13 | 46689293   |                                                     | -0.0422292  | -0.0699082848775485 | 0.0793305813717542 |
| cg24131747 | 14 | 68141730   | VTI1B                                               | 0.032694    | 1.34855498852687    | 0.0793305813717542 |
| cg16882609 | 11 | 695345     | TMEM80;TMEM80;TMEM80;TMEM80;DEAF1;DEAF1;DEAF1;DEAF1 | 0.0137997   | 0.624265423399774   | 0.0793305813717542 |
| cg13792528 | 6  | 28834507   |                                                     | 0.011916    | 0.598955973407073   | 0.0793305813717542 |
| cg18845801 | 7  | 16793338   | TSPAN13                                             | 0.00810593  | 0.886387062805729   | 0.0793305813717542 |
| cg25261191 | 7  | 101847096  | CUX1;CUX1;CUX1                                      | -0.0174071  | -0.0262482018451987 | 0.0793305813717542 |
| cg13956095 | 17 | 81037419   | METRNL                                              | 0.04387     | 0.378543919199463   | 0.0793305813717542 |
| cg12419067 | 3  | 9975156    | IL17RC;CRELD1;CRELD1;CRELD1;IL17RC;IL17RC           | 0.0240952   | 0.652072518197849   | 0.0793378679602681 |
| cg04044418 | 16 | 89789362   | ZNF276;ZNF276                                       | 0.0197135   | 0.613247333218089   | 0.0793378679602681 |
| cg06813578 | 15 | 51386254   | TNFAIP8L3                                           | 0.0114091   | 0.288831640443127   | 0.0793378679602681 |
| cg23151295 | 14 | 76796070   |                                                     | 0.0135534   | 0.400669756877421   | 0.0793378679602681 |
| cg02708544 | 5  | 17376892   |                                                     | -0.0585688  | -0.101671716157013  | 0.0793378679602681 |
| cg18848478 | 1  | 113933423  | MAGI3;MAGI3                                         | 0.0225022   | 0.737061475001158   | 0.0793378679602681 |
| cg26976187 | 5  | 176944204  | DDX41                                               | 0.023549    | 0.761510611972036   | 0.0793378679602681 |
| cg00673286 | 15 | 83349613   | AP3B2                                               | 0.0172086   | 0.599942477180094   | 0.0793378679602681 |
| cg22526051 | 8  | 145743825  | RECQL4;LRRC14                                       | 0.0153557   | 0.58626317119619    | 0.0793378679602681 |
| cg13128139 | 2  | 27651391   | NRBP1                                               | 0.00884718  | 0.550205619301235   | 0.0793378679602681 |
| cg16113772 | 6  | 2972824    | SERPIN6;SERPIN6;SERPIN6;SERPIN6;SERPIN6;SERPIN6     | -0.0610608  | -0.116186932854472  | 0.0793378679602681 |
| cg05157272 | 1  | 246862256  |                                                     | -0.0576417  | -0.109346800744728  | 0.0793378679602681 |
| cg22844232 | 3  | 193776047  |                                                     | 0.058106    | 0.761972563805077   | 0.0793378679602681 |
| cg00840257 | 16 | 8963031    | CARHSP1;CARHSP1                                     | 0.0337928   | 0.99206144599782    | 0.0793378679602681 |
| cg08378505 | 17 | 73127297   | NT5C                                                | 0.0145702   | 0.773142263271903   | 0.0793378679602681 |
| cg14499653 | 1  | 24740357   | STPG1;STPG1;STPG1;STPG1                             | 0.0118049   | 0.408982277919345   | 0.0793378679602681 |
| cg09506172 | 19 | 28331274   |                                                     | -0.0296985  | -0.0526011745237426 | 0.0793378679602681 |
| cg00744495 | 9  | 138710327  | CAMSAP1                                             | -0.0191009  | -0.02909111436708   | 0.0793378679602681 |
| cg21251197 | 9  | 140514016  | EHMT1;C9orf37;EHMT1                                 | 0.00505812  | 0.45627609595058    | 0.0793378679602681 |
| cg06911002 | 2  | 160408618  | BAZ2B;BAZ2B                                         | -0.0712466  | -0.129726416744101  | 0.0793378679602681 |
| cg05271080 | 4  | 41986520   | DCAF4L1;DCAF4L1                                     | -0.0700341  | -0.149312913990677  | 0.0793378679602681 |
| cg27656398 | 12 | 123451108  | ABCB9;ABCB9;ABCB9                                   | 0.021718    | 0.40837785152673    | 0.0793378679602681 |
| cg16637556 | 19 | 41104184   | LTBP4;LTBP4                                         | 0.0303564   | 0.440208913434411   | 0.0793378679602681 |
| cg15781375 | 2  | 27651918   | NRBP1                                               | 0.0312344   | 0.510465973413684   | 0.0793378679602681 |
| cg11199490 | 12 | 53564794   | CSAD;CSAD                                           | -0.0378473  | -0.060976337556189  | 0.0793378679602681 |
| cg05141005 | 1  | 175070412  | TNN                                                 | -0.0328492  | -0.0651450751307536 | 0.0793378679602681 |
| cg12235622 | 1  | 43856473   | C1orf84;MED8;MED8                                   | -0.0106569  | -0.0159976805234325 | 0.0793378679602681 |
| cg04623019 | 1  | 115034522  | TRIM33;TRIM33                                       | -0.0131968  | -0.0204761410738422 | 0.0793378679602681 |
| cg16022195 | 10 | 19000784   |                                                     | -0.0735753  | -0.14536388937047   | 0.0793378679602681 |
| cg26549029 | 12 | 133286883  | PGAM5;PGAM5;PGAM5                                   | 0.0115361   | 0.65710570638353    | 0.0793378679602681 |
| cg12757037 | 2  | 113321746  | POLR1B;POLR1B;POLR1B;POLR1B;POLR1B;POLR1B           | -0.0361837  | -0.0560194802195172 | 0.0793378679602681 |
| cg02580528 | 1  | 183441376  | SMG7;SMG7;SMG7                                      | 0.0116277   | 0.624152827450393   | 0.0793378679602681 |
| cg08095532 | 15 | 78831288   | PSMA4;PSMA4;PSMA4                                   | 0.00909853  | 0.0135944415104358  | 0.0793378679602681 |
| cg27362998 | 10 | 73376966   | CDH23;CDH23;CDH23;CDH23;CDH23;CDH23;CDH23;CDH23     | 0.00903256  | 0.0134199738222831  | 0.0793378679602681 |
| cg26715814 | 19 | 7529580    | ARHGEF18;ARHGEF18;ARHGEF18;ARHGEF18                 | 0.0105449   | 0.0161651484299687  | 0.0793378679602681 |
| cg13751231 | 13 | 103058039  |                                                     | -0.0292776  | -0.0464476736982833 | 0.0793378679602681 |
| cg14472484 | 1  | 184517082  | C1orf21                                             | -0.00937866 | -0.0139105266737349 | 0.0793378679602681 |
| cg27530136 | 1  | 156782996  | SH2D2A;SH2D2A;SH2D2A;SH2D2A;SH2D2A                  | -0.0694506  | -0.191445670485549  | 0.0793378679602681 |
| cg03865418 | 9  | 79057167   | GCNT1;GCNT1                                         | -0.0688788  | -0.147721198395178  | 0.079340596170282  |
| cg06028533 | 10 | 16478910   | PTER;PTER                                           | 0.0105994   | 0.431272762310459   | 0.079340596170282  |
| cg00164041 | 4  | 89378199   | HERC5                                               | 0.0053682   | 0.418421038443845   | 0.079340596170282  |
| cg12339478 | 20 | 44573621   | PCIF1                                               | -0.0175064  | -0.0263402749899082 | 0.079340596170282  |
| cg19497734 | 4  | 144257218  | GAB1;GAB1                                           | 0.0123056   | 0.553379808552762   | 0.079340596170282  |
| cg02495519 | 16 | 20911570   | DCUN1D3;LYRM1;LYRM1;LYRM1;LYRM1                     | 0.030625    | 0.628198069771184   | 0.079340596170282  |
| cg27555944 | 3  | 49056208   | DALRD3;DALRD3                                       | 0.0211143   | 0.633159292144349   | 0.079340596170282  |
| cg06889339 | 6  | 168197625  | C6orf123                                            | 0.0502204   | 0.942195408726288   | 0.079340596170282  |
| cg17014378 | 9  | 136025100  | RALGDS                                              | 0.0171257   | 0.459632711339667   | 0.079340596170282  |
| cg06104657 | 2  | 74734831   | PCGF1                                               | 0.0065611   | 0.420139998045527   | 0.079340596170282  |
| cg14178882 | 21 | 38128940   | HLCS;HLCS;HLCS                                      | 0.00965807  | 0.0144612727151965  | 0.079340596170282  |
| cg21737173 | 9  | 16870822   | BNC2                                                | 0.0296259   | 0.592241409695166   | 0.0793950033231131 |
| cg20852378 | 4  | 184680264  |                                                     | -0.0729902  | -0.15179966062843   | 0.0793950033231131 |
| cg08522087 | 5  | 14871910   | ANKH                                                | 0.0266289   | 1.17995422560284    | 0.0793950033231131 |
| cg20971970 | 12 | 57632495   | NDUFA4L2                                            | 0.021934    | 0.630810487105509   | 0.0793950033231131 |
| cg01640456 | 4  | 141075565  | MAML3                                               | 0.00816077  | 0.378162475450975   | 0.0793950033231131 |
| cg20387272 | 8  | 144640401  | GSDMD;GSDMD                                         | 0.0128089   | 0.697234785092243   | 0.0793950033231131 |
| cg25584761 | 2  | 16410140   |                                                     | -0.0126409  | -0.0188105434373659 | 0.0793950033231131 |
| cg18119529 | 19 | 48775014   | ZNF114                                              | 0.00390244  | 0.455808110085945   | 0.0793950033231131 |
| cg01436700 | 2  | 2105953902 | C2orf49                                             | 0.0179832   | 0.551161907584893   | 0.079411595111465  |
| cg05269553 | 16 | 1535814    |                                                     | 0.0939968   | 0.200601216855317   | 0.079472069825999  |
| cg03538717 | 3  | 79068441   | ROBO1;ROBO1;ROBO1;ROBO1;ROBO1;ROBO1                 | 0.00908176  | 0.488227886626017   | 0.0796531557145924 |
| cg08781042 | 12 | 48166839   | SLC48A1                                             | 0.00528021  | 0.411369295520528   | 0.0799043081031149 |
| cg22736789 | 7  | 138561753  | KIAA1549;KIAA1549                                   | 0.00527919  | 0.00781634195715019 | 0.0799043081031149 |
| cg03648789 | 2  | 38304037   | CYP11B1                                             | 0.0187318   | 0.624641321517619   | 0.080036094059226  |
| cg16236108 | 4  | 84457579   | AGPAT9                                              | 0.0194576   | 0.74111280338375    | 0.0801095170482245 |
| cg11288647 | 14 | 95727390   | CLMN                                                | -0.038574   | -0.0706844092278623 | 0.0802433827886744 |
| cg13260280 | 8  | 27063108   |                                                     | -0.0666738  | -0.122490451329967  | 0.0803625254972515 |
| cg12866551 | 10 | 20019641   |                                                     | -0.018526   | -0.0285666727327626 | 0.0803625254972515 |
| cg00826610 | 9  | 37800654   | DCAF10                                              | 0.0213516   | 0.676964314352443   | 0.0803625254972515 |
| cg12528637 | 15 | 40987266   | RAD51-AS1;RAD51;RAD51;RAD51;RAD51                   | 0.0282344   | 0.753248375412799   | 0.0807297440978179 |
| cg10904699 | 11 | 123301490  |                                                     | 0.0350276   | 0.65625490039188    | 0.0807297440978179 |
| cg04547425 | 17 | 73043127   | ATP5H;KCTD2;ATP5H                                   | 0.0103649   | 0.676700136605759   | 0.0807297440978179 |
| cg02497785 | 7  | 48494608   | ABCA13                                              | 0.101222    | 0.177600050549182   | 0.0807297440978179 |



|            |     |           |                                                                          |            |                     |                    |
|------------|-----|-----------|--------------------------------------------------------------------------|------------|---------------------|--------------------|
| cg01390564 | 16  | 31162282  | PRSS36                                                                   | -0.0565979 | -0.156914949837984  | 0.081281342815783  |
| cg20199354 | 16  | 3070259   | TNFRSF12A                                                                | 0.0354783  | 0.296197551185417   | 0.081281342815783  |
| cg20882291 | 8   | 97506160  | SDC2;SDC2                                                                | 0.0364115  | 1.17682668254829    | 0.081281342815783  |
| cg04240504 | 6   | 109330951 | SESN1;SESN1;SESN1                                                        | 0.0287033  | 0.574879525292247   | 0.081281342815783  |
| cg05731183 | 15  | 68132796  |                                                                          | 0.00538438 | 0.476262489679977   | 0.0813644945458804 |
| cg03617693 | 3   | 136751559 |                                                                          | 0.0177865  | 0.515901336677896   | 0.0813644945458804 |
| cg11525941 | 5   | 87971950  | LOC645323;LOC645323                                                      | 0.026874   | 0.6118199705262     | 0.0813644945458804 |
| cg27408262 | -10 | 126706831 | CTBP2;CTBP2;CTBP2                                                        | -0.0761446 | -0.145586659332559  | 0.0814415238184259 |
| cg24883333 | 1   | 25071513  | CLIC4                                                                    | 0.0127476  | 0.587485558277382   | 0.0814415238184259 |
| cg14804102 | 16  | 89339261  | ANKRD11;ANKRD11;ANKRD11                                                  | -0.0281457 | -0.0436051576575561 | 0.0814415238184259 |
| cg24280449 | 16  | 55690309  | SLC6A2;SLC6A2;SLC6A2                                                     | 0.0322991  | 0.615428181520352   | 0.0814415238184259 |
| cg06520520 | 22  | 46594254  | PPARA;PPARA;PPARA;PPARA                                                  | 0.0107748  | 0.0161555524880397  | 0.0814415238184259 |
| cg16648632 | 6   | 6003584   | NRN1                                                                     | 0.0434475  | 0.619448228939364   | 0.08167041962779   |
| cg02231834 | 16  | 11560831  | LOC101927131                                                             | -0.0336043 | -0.053179494135463  | 0.0816908409525518 |
| cg11482290 | 12  | 51136416  | DIP2B                                                                    | -0.0284444 | -0.0451826590081795 | 0.0816908409525518 |
| cg00448889 | 15  | 60714492  | NARG2;NARG2                                                              | -0.0812434 | -0.156937318625814  | 0.0817246500291242 |
| cg08803445 | 20  | 30466863  | TLL9                                                                     | -0.0804697 | -0.169303880293586  | 0.0817246500291242 |
| cg12511277 | 11  | 134633148 |                                                                          | -0.0159383 | -0.0240374096514543 | 0.0817246500291242 |
| cg13650856 | 2   | 63005412  | EHBP1;EHBP1;EHBP1;EHBP1                                                  | -0.0362583 | -0.056437290984992  | 0.0817351082821855 |
| cg16736300 | 19  | 8579199   | ZNF414;ZNF414                                                            | 0.016242   | 0.834521368709003   | 0.0817543124009382 |
| cg09831611 | 2   | 54261700  |                                                                          | -0.0550777 | -0.101923117050635  | 0.0817543124009382 |
| cg13302166 | 17  | 8534048   | MYH10                                                                    | 0.0230257  | 0.470429874690153   | 0.0817543124009382 |
| cg17826675 | 3   | 156392703 | TIPARP-AS1;TIPARP;TIPARP                                                 | 0.040632   | 1.02280230950137    | 0.0817543124009382 |
| cg12858212 | 16  | 4451467   | CORO7-PAM16;CORO7;CORO7;CORO7                                            | -0.0131147 | -0.0202521576993327 | 0.0817543124009382 |
| cg10954363 | 3   | 112930438 | BOC                                                                      | 0.0104477  | 0.611561793156546   | 0.0817543124009382 |
| cg15577706 | 17  | 33763575  | SLFN13                                                                   | -0.0339716 | -0.0534379453737258 | 0.0817543124009382 |
| cg15741083 | 13  | 21099541  | CRYL1                                                                    | 0.0224043  | 0.96528096797583    | 0.0817543124009382 |
| cg04827646 | 14  | 72971119  | RGS6;RGS6;RGS6;RGS6;RGS6;RGS6;RGS6;RGS6;RGS6                             | -0.0412257 | -0.0669600715502142 | 0.0817543124009382 |
| cg20549229 | 8   | 98655248  | MTDH                                                                     | -0.0455093 | -0.0789166532206119 | 0.0817543124009382 |
| cg23346408 | 10  | 81001957  | ZMI1                                                                     | 0.0239336  | 0.456913311694689   | 0.0817543124009382 |
| cg06442378 | 10  | 34587378  | PARD3;PARD3;PARD3;PARD3;PARD3;PARD3;PARD3                                | -0.0750186 | -0.152268848951066  | 0.0817543124009382 |
| cg13151361 | 2   | 179298300 | PRKRA;MIR548N;PRKRA;PRKRA                                                | -0.0966551 | -0.183721388010715  | 0.0817543124009382 |
| cg16303510 | 6   | 14394735  |                                                                          | -0.0122786 | -0.0185582197506712 | 0.0817543124009382 |
| cg04241305 | 5   | 137689053 | KDM3B                                                                    | 0.0125197  | 0.457166623014015   | 0.0817543124009382 |
| cg05151395 | 17  | 8192371   | SLC25A35;RANGRF                                                          | 0.0158581  | 0.491614816375493   | 0.0817543124009382 |
| cg17589325 | 1   | 201924583 | TIMM17A                                                                  | 0.040507   | 0.754258418892012   | 0.0817543124009382 |
| cg05226454 | 10  | 725877    | DIP2C                                                                    | 0.00979737 | 0.0148754511356934  | 0.0817543124009382 |
| cg01882095 | 19  | 17420128  | DDA1                                                                     | 0.0137901  | 0.928030609419805   | 0.0817543124009382 |
| cg05090972 | 16  | 69788427  | NOB1                                                                     | 0.00602102 | 0.39760373615222    | 0.0817543124009382 |
| cg09818930 | 16  | 31106315  | VKORC1;VKORC1                                                            | 0.0265928  | 0.925179190944276   | 0.0817543124009382 |
| cg10058885 | 22  | 38673051  |                                                                          | -0.0888124 | -0.174192013820255  | 0.0817543124009382 |
| cg17736252 | 1   | 78273462  | FAM73A                                                                   | -0.0481229 | -0.0895940817638817 | 0.0817543124009382 |
| cg10698424 | 9   | 114423570 | GNG10;DNAJC25-GNG10                                                      | 0.00665252 | 0.48054967539005    | 0.0817543124009382 |
| cg18100653 | 7   | 155089030 | INSIG1;INSIG1;INSIG1                                                     | 0.0215638  | 0.734742324536004   | 0.0817543124009382 |
| cg05630523 | 19  | 12886518  | HOOK2;HOOK2                                                              | 0.0131603  | 0.720255997144753   | 0.0817543124009382 |
| cg01979888 | 12  | 6665424   | IFFO1;IFFO1                                                              | 0.013765   | 0.480339263719533   | 0.0817543124009382 |
| cg17749261 | 3   | 156392701 | TIPARP-AS1;TIPARP;TIPARP                                                 | 0.0943698  | 2.21118344560835    | 0.0817543124009382 |
| cg03498383 | 16  | 68002044  | SLC12A4;SLC12A4;SLC12A4;SLC12A4                                          | 0.00564202 | 0.27442085553987    | 0.0817758765894366 |
| cg20607106 | 1   | 95538550  | ALG14                                                                    | 0.018435   | 0.49722880321711    | 0.0819650163810877 |
| cg24697311 | 18  | 7712348   | PQLC1;PQLC1;PQLC1                                                        | 0.0107678  | 0.458341897965572   | 0.0819650163810877 |
| cg17681277 | 16  | 3070284   | TNFRSF12A                                                                | 0.0544559  | 0.358903794002637   | 0.0820047408072486 |
| cg06455032 | 19  | 45251911  | BCL3                                                                     | 0.0409016  | 0.275176524265218   | 0.0820047408072486 |
| cg20942198 | 3   | 196014751 | PCYT1A                                                                   | 0.00753867 | 0.494902269260155   | 0.0820047408072486 |
| cg04888730 | 16  | 3712318   | TRAP1;TRAP1                                                              | 0.0161035  | 0.024884888399446   | 0.0820047408072486 |
| cg22732549 | 8   | 8820073   |                                                                          | -0.0698961 | -0.122779427944503  | 0.0820047408072486 |
| cg22051338 | 21  | 34989581  | CRYZL1                                                                   | -0.0406275 | -0.067579021569009  | 0.0820455234964    |
| cg13499468 | 1   | 23494459  | LUZP1;LUZP1                                                              | 0.038204   | 0.394319920792089   | 0.0820894269120116 |
| cg07301329 | 16  | 85648263  | KIAA0182;KIAA0182                                                        | 0.0477726  | 0.350271054625089   | 0.0820894269120116 |
| cg05590233 | 17  | 109545    | RPH3AL                                                                   | -0.0391479 | -0.0639228602978652 | 0.0820894269120116 |
| cg01109763 | 4   | 3387281   | RGS12;RGS12;RGS12                                                        | 0.0298177  | 0.731985158195133   | 0.0821019867366648 |
| cg05303981 | 9   | 21995305  | CDKN2A;CDKN2B-AS1;CDKN2B-AS1;CDKN2B-AS1;CDKN2B-AS1;CDKN2B-AS1;CDKN2B-AS1 | 0.0287836  | 0.598861551798119   | 0.0821019867366648 |
| cg11384654 | 12  | 43041781  | LOC101927058                                                             | -0.0696553 | -0.139898117023822  | 0.0821932952287104 |
| cg06705772 | 11  | 62439523  | C11orf48;C11orf83                                                        | 0.00655605 | 0.449729081709688   | 0.0821932952287104 |
| cg05787120 | 3   | 50365854  | TUSC2                                                                    | 0.0157629  | 0.691519253389506   | 0.0821932952287104 |
| cg09832197 | 9   | 97007732  |                                                                          | -0.0745395 | -0.143175661900673  | 0.0822454053551294 |
| cg23604584 | 13  | 50367114  | KPNA3                                                                    | 0.0175593  | 0.676105778246371   | 0.0822719801133613 |
| cg16767327 | 2   | 29331293  | CLIP4                                                                    | -0.048735  | -0.0802158823320895 | 0.0823199235122547 |
| cg10723075 | 20  | 20693064  | RALGAP2                                                                  | 0.0108272  | 0.495989316935868   | 0.0823867859668522 |
| cg18780259 | 19  | 19006582  | GDF1;LASS1;LASS1                                                         | 0.0414045  | 0.612373709707421   | 0.0823867859668522 |
| cg07249919 | 5   | 53813391  | SNX18;SNX18;SNX18                                                        | 0.0161937  | 0.323497660198889   | 0.0823867859668522 |
| cg05797914 | 5   | 110702850 | CAMK4                                                                    | -0.109757  | -0.227903181313591  | 0.0823867859668522 |
| cg00558174 | 5   | 14872551  | ANKH                                                                     | 0.0123721  | 0.5303711771419631  | 0.0823867859668522 |
| cg08077890 | 18  | 157838    | USP14;USP14                                                              | -0.0798154 | -0.143233768537799  | 0.0823867859668522 |
| cg09856869 | 1   | 33286822  | S100BPB;S100BPB                                                          | -0.067439  | -0.159057408791195  | 0.0823867859668522 |
| cg21605986 | 5   | 17578875  | KIAA1191;KIAA1191;KIAA1191;KIAA1191;KIAA1191                             | 0.033842   | 1.22543803201557    | 0.0823867859668522 |
| cg20506184 | 10  | 7453329   | SFMBT2;SFMBT2                                                            | 0.0102988  | 0.52758315271208    | 0.0823867859668522 |
| cg02745211 | 3   | 132757106 | TMEM108;TMEM108                                                          | 0.00503896 | 0.313374997624898   | 0.0823867859668522 |
| cg02240315 | 1   | 41707901  | SCMH1;SCMH1;SCMH1;SCMH1                                                  | 0.0126592  | 0.438692364880103   | 0.0823867859668522 |
| cg18858865 | 14  | 59655267  | DAAM1                                                                    | 0.0135727  | 0.715450089261765   | 0.0823867859668522 |
| cg08396677 | 2   | 136288699 | ZRANB3;R3HDM1;ZRANB3                                                     | 0.00486294 | 0.291054875711546   | 0.0823867859668522 |
| cg17386899 | 15  | 79603965  | TMED3                                                                    | 0.0269044  | 0.642515317938987   | 0.0823867859668522 |
| cg07803781 | 1   | 11333577  | UBIAD1;UBIAD1                                                            | 0.00667931 | 0.536975027923937   | 0.0823867859668522 |

|            |    |           |                                                       |             |                      |                    |
|------------|----|-----------|-------------------------------------------------------|-------------|----------------------|--------------------|
| cg07654559 | 2  | 74710618  | TTC31;CCDC142;TTC31                                   | 0.0463904   | 0.557126735083305    | 0.0823867859668522 |
| cg08139833 | 11 | 67798212  | NDUFS8                                                | 0.00354854  | 0.416327193773097    | 0.0823867859668522 |
| cg22748698 | 17 | 7146447   | GABARAP                                               | 0.0127312   | 0.432853628826418    | 0.0823867859668522 |
| cg22841635 | 14 | 69951305  | FLJ44817                                              | 0.0211427   | 0.362378511579842    | 0.0823867859668522 |
| cg22801675 | 5  | 175971121 |                                                       | 0.0122575   | 0.51620317708674     | 0.0823867859668522 |
| cg13298932 | 1  | 155100169 | EFNA1;EFNA1                                           | 0.0251105   | 0.799362195893556    | 0.0823867859668522 |
| cg03629096 | 14 | 73915638  | NUMB;NUMB;NUMB;NUMB                                   | -0.0802815  | -0.144128968971492   | 0.0823867859668522 |
| cg23346107 | 14 | 69864717  | ERH;SLC39A9                                           | 0.0117562   | 0.47451074441975     | 0.0823867859668522 |
| cg11144753 | 14 | 103740065 |                                                       | 0.028068    | 0.689621819392766    | 0.0823867859668522 |
| cg14013133 | 1  | 43887850  | KIAA0467                                              | 0.0123269   | 0.0186465009805289   | 0.0823867859668522 |
| cg22858733 | 6  | 35995359  | MAPK14;MAPK14;MAPK14;MAPK14                           | 0.00758358  | 0.535702859247489    | 0.0823867859668522 |
| cg14354168 | 6  | 1619134   |                                                       | -0.0544584  | -0.104567402427658   | 0.0823867859668522 |
| cg26494252 | 19 | 15083916  | SLC1A6                                                | -0.0519934  | -0.119480967983199   | 0.0823867859668522 |
| cg04129754 | 19 | 28660027  |                                                       | -0.0748483  | -0.188592691118932   | 0.0823867859668522 |
| cg27060912 | 19 | 6517005   |                                                       | 0.0168872   | 0.459322433816302    | 0.0823867859668522 |
| cg07691761 | 5  | 131892711 | RAD50;RAD50;RAD50;RAD50                               | 0.00823551  | 0.382860969052017    | 0.0823867859668522 |
| cg11704396 | 3  | 48723701  | NCKIPSD;NCKIPSD                                       | 0.0288791   | 0.960254012517783    | 0.0823867859668522 |
| cg01601097 | 1  | 229364737 |                                                       | -0.0499741  | -0.0891757921967299  | 0.0823867859668522 |
| cg24671245 | 10 | 76585406  | MYST4                                                 | 0.0214917   | 0.494148775879606    | 0.0823867859668522 |
| cg13117590 | 6  | 3981622   |                                                       | -0.0262221  | -0.0405777832468137  | 0.0823867859668522 |
| cg07045469 | 7  | 48494579  | ABCA13                                                | 0.0733667   | 0.118990820062115    | 0.0823867859668522 |
| cg27102864 | 16 | 5835418   | NDRG4;NDRG4;NDRG4                                     | 0.0171118   | 0.559439911672481    | 0.0825116137994541 |
| cg0906147  | 4  | 39979791  | PDS5A;PDS5A;PDS5A                                     | 0.00812562  | 0.380071879115992    | 0.0825996943841617 |
| cg12562042 | 16 | 19098052  |                                                       | 0.00852627  | 0.407302566158156    | 0.0825996943841617 |
| cg22322834 | 12 | 50135138  | TMBIM6;TMBIM6                                         | 0.00922347  | 0.378572715658719    | 0.0825996943841617 |
| cg14819616 | 10 | 128839969 | DOCK1;DOCK1                                           | -0.0666964  | -0.125609968760473   | 0.0825996943841617 |
| cg0803088  | 10 | 43600706  | RET;RET                                               | 0.0571401   | 2.1024312454709      | 0.0825996943841617 |
| cg25123308 | 2  | 113300087 | POLR1B;POLR1B                                         | 0.014847    | 0.525715806360374    | 0.0825996943841617 |
| cg05079543 | 19 | 42388414  | ARHGEF1;ARHGEF1;ARHGEF1                               | 0.0258908   | 0.679653326079312    | 0.0825996943841617 |
| cg01119259 | 14 | 44977304  | FSCB                                                  | -0.0728687  | -0.140126618094556   | 0.0825996943841617 |
| cg10624480 | 1  | 153936631 | SLC39A1                                               | 0.00301585  | 0.393008518535928    | 0.0825996943841617 |
| cg26064774 | 4  | 6666009   |                                                       | 0.078392    | 0.654286787449608    | 0.0825996943841617 |
| cg11701951 | 12 | 51477122  | CSRN2;CSRN2                                           | 0.00824779  | 0.460824224853452    | 0.0825996943841617 |
| cg22942210 | 14 | 69654470  |                                                       | -0.0498874  | -0.0831544373723812  | 0.0825996943841617 |
| cg17618987 | 22 | 16190030  |                                                       | -0.058866   | -0.10921598212481    | 0.0825996943841617 |
| cg26314507 | 15 | 25902323  |                                                       | -0.039793   | -0.0630016128053776  | 0.0825996943841617 |
| cg0502972  | 17 | 6543355   | TXNDC17;KIAA0753                                      | 0.0343233   | 0.661773325733138    | 0.0825996943841617 |
| cg08136599 | 6  | 8042158   | EEF1E1-BLOC1S5;BLOC1S5;BLOC1S5;BLOC1S5;BLOC1S5-TXNDC5 | -0.0549408  | -0.0996047854342244  | 0.0825996943841617 |
| cg17372361 | 14 | 61612138  |                                                       | -0.0112754  | -0.016768963429607   | 0.0825996943841617 |
| cg00227490 | 11 | 9336016   | TMEM41B;TMEM41B;TMEM41B;TMEM41B;TMEM41B               | 0.00776388  | 0.50295224226309     | 0.0825996943841617 |
| cg20477448 | 4  | 13656704  |                                                       | 0.00661765  | 0.00977039759548299  | 0.0825996943841617 |
| cg15896339 | 1  | 872649    | SAMD11                                                | 0.0142242   | 0.570273716917833    | 0.0825996943841617 |
| cg01326942 | 6  | 90596921  |                                                       | -0.0496602  | -0.0813975338386198  | 0.0825996943841617 |
| cg07889826 | 3  | 50127152  | RBMS                                                  | 0.014004    | 0.47891711206763     | 0.0825996943841617 |
| cg24346110 | 15 | 83407523  | ACTG1P17                                              | -0.0846955  | -0.158397765872212   | 0.0825996943841617 |
| cg14107485 | 8  | 27950471  | ELP3;ELP3;ELP3;ELP3;ELP3                              | 0.0211102   | 0.715465482188239    | 0.0825996943841617 |
| cg17944940 | 17 | 73285520  | SLC25A19;SLC25A19;SLC25A19;SLC25A19;SLC25A19          | 0.0337685   | 1.12313108043454     | 0.0825996943841617 |
| cg05062612 | 12 | 108523409 | WSCD2                                                 | 0.00504195  | 0.346478818759469    | 0.0825996943841617 |
| cg08410109 | 2  | 101179395 | PDCL3                                                 | 0.0185361   | 0.688865715086566    | 0.0825996943841617 |
| cg03652211 | 12 | 108736538 |                                                       | -0.0339535  | -0.0592433557664198  | 0.0825996943841617 |
| cg02688348 | 11 | 57103429  | SSRP1                                                 | 0.0451579   | 1.0669581988487      | 0.0825996943841617 |
| cg17353057 | 21 | 46294185  | PTTG1IP                                               | 0.018078    | 0.814876158427757    | 0.0825996943841617 |
| cg07640747 | 10 | 93392870  | PPP1R3C                                               | 0.0157911   | 0.481092103283054    | 0.0825996943841617 |
| cg00689580 | 6  | 10420798  | TFAP2A                                                | 0.045967    | 0.742214872348575    | 0.0825996943841617 |
| cg21231262 | 9  | 122521448 |                                                       | -0.0663171  | -0.182753494545701   | 0.0825996943841617 |
| cg08005320 | 16 | 68057225  | DUS2L;DUS2L;DDX28;DDX28                               | 0.0171988   | 0.970912547529664    | 0.0825996943841617 |
| cg27325395 | 9  | 99089615  | SLC35D2;SLC35D2;SLC35D2                               | -0.0384912  | -0.061647998977324   | 0.0825996943841617 |
| cg13339291 | 17 | 80155868  | CCDC57                                                | -0.0595542  | -0.107863844457028   | 0.0825996943841617 |
| cg08818195 | 12 | 133066505 | FBRSL1                                                | 0.0445303   | 0.488336393268662    | 0.0825996943841617 |
| cg14264747 | 3  | 133383753 |                                                       | -0.0211415  | -0.0335494769496024  | 0.0825996943841617 |
| cg27223543 | 1  | 45098125  | RNF220                                                | 0.0195343   | 0.565996291426639    | 0.0825996943841617 |
| cg02795515 | 17 | 37381273  | STAC2                                                 | 0.0148687   | 0.542569822830144    | 0.0825996943841617 |
| cg09838326 | 8  | 30629816  |                                                       | -0.0213192  | -0.0342231648619619  | 0.0825996943841617 |
| cg05080815 | 19 | 35379312  |                                                       | -0.0140925  | -0.0212619290501054  | 0.0825996943841617 |
| cg24202654 | 2  | 171674567 | GAD1;GAD1                                             | 0.0158655   | 0.354505465971129    | 0.0825996943841617 |
| cg20788115 | 15 | 75636870  |                                                       | -0.0495199  | -0.0791204560562389  | 0.0825996943841617 |
| cg15020726 | 15 | 31196382  | MTMR15;MTMR15;MTMR15;MTMR15                           | 0.0090955   | 0.462825609623584    | 0.0825996943841617 |
| cg15495920 | 1  | 65778729  | DNAJC6                                                | -0.0232107  | -0.0359620191696452  | 0.0825996943841617 |
| cg00872998 | 9  | 74820402  | GDA;GDA;GDA;GDA                                       | -0.093149   | -0.214274964586273   | 0.0825996943841617 |
| cg21484680 | 2  | 27593328  | EIF2B4;EIF2B4;SNX17;EIF2B4                            | 0.0262032   | 0.753047096794773    | 0.0825996943841617 |
| cg17814109 | 5  | 1386363   |                                                       | 0.0248838   | 0.561887006517678    | 0.0826207889194387 |
| cg07102345 | 9  | 111696472 | IKBKAP;IKBKAP;FAM206A                                 | 0.0228074   | 0.481231766218665    | 0.082629327055183  |
| cg04553410 | 7  | 150864885 | GBX1                                                  | 0.0242052   | 0.899281693104227    | 0.082629327055183  |
| cg13717023 | 5  | 53606639  | 15,00 ARL                                             | 0.0245353   | 0.859248430386943    | 0.082629327055183  |
| cg23451324 | 19 | 11708147  | ZNF627                                                | 0.00763783  | 0.480320323634346    | 0.082629327055183  |
| cg26329992 | 4  | 56719469  | EXOC1;EXOC1;EXOC1                                     | -0.00561562 | -0.00822928896105215 | 0.0827147122842582 |
| cg18677773 | 5  | 168018169 |                                                       | -0.0767063  | -0.16113727079145    | 0.0827226567216581 |
| cg26260369 | 14 | 68141723  | VTI1B                                                 | 0.0459022   | 1.28734823142486     | 0.0827226567216581 |
| cg26672794 | 1  | 25257131  | RUNX3;RUNX3                                           | 0.0422505   | 0.467989449741244    | 0.0827226567216581 |
| cg13414679 | 11 | 70243843  | CTTN;CTTN                                             | 0.0321062   | 0.653643548611843    | 0.0827226567216581 |
| cg14580567 | 4  | 145567271 | HHIP;HHIP                                             | 0.0169041   | 0.456349202527035    | 0.0827226567216581 |
| cg15246686 | 9  | 72715990  | MAMDC2;MAMDC2                                         | -0.0220539  | -0.0336214862024681  | 0.0827226567216581 |

|            |    |           |                                        |             |                      |                    |
|------------|----|-----------|----------------------------------------|-------------|----------------------|--------------------|
| cg05361503 | 16 | 4475729   | DNAJA3;DNAJA3;DNAJA3                   | 0.0203365   | 0.964367557322025    | 0.0827226567216581 |
| cg06362482 | 8  | 16021835  | MSR1;MSR1;MSR1                         | -0.0406533  | -0.361574541049669   | 0.0827226567216581 |
| cg19566272 | 6  | 139695824 | CITED2;CITED2;CITED2                   | 0.00736344  | 0.613585117151741    | 0.0827226567216581 |
| cg17772342 | 5  | 134871686 | NEUROG1                                | 0.0584517   | 0.334191584425774    | 0.0827226567216581 |
| cg03631461 | 5  | 179089038 |                                        | -0.00700001 | -0.0103779107154385  | 0.0827226567216581 |
| cg18013408 | 7  | 100487659 | UFSP1;ACHE;ACHE                        | 0.0193266   | 0.328929969406111    | 0.0827226567216581 |
| cg11218415 | 8  | 104030731 |                                        | -0.0535996  | -0.0878979430975534  | 0.0827226567216581 |
| cg19756512 | 11 | 35068439  |                                        | -0.0321618  | -0.0504238633431439  | 0.0827226567216581 |
| cg18012350 | 15 | 74753669  | UBL7;UBL7                              | 0.0192544   | 0.632433276773893    | 0.0827226567216581 |
| cg04847795 | 1  | 70820736  | HHLA3;ANKRD13C;HHLA3;HHLA3;HHLA3       | 0.025508    | 0.901395933473746    | 0.0827226567216581 |
| cg09591886 | 16 | 22333264  | POLR3E                                 | 0.00672594  | 0.0100511707316762   | 0.0827226567216581 |
| cg05203855 | 19 | 799445    | TIMM44                                 | 0.0173048   | 0.375055211464623    | 0.0827226567216581 |
| cg22084302 | 13 | 20246166  | MPHOSPH8                               | 0.00357821  | 0.00522875833072869  | 0.0827226567216581 |
| cg13789219 | 13 | 99438910  |                                        | -0.0224605  | -0.0342209974195565  | 0.0827226567216581 |
| cg04294412 | 4  | 7045720   | CCDC96;TADA2B                          | 0.0284111   | 1.02138056875953     | 0.0827226567216581 |
| cg21526572 | 10 | 133850592 |                                        | 0.0368748   | 0.430197330149547    | 0.0827226567216581 |
| cg16533336 | 7  | 70765583  | WBSCR17                                | -0.0389594  | -0.0699915207325286  | 0.0827226567216581 |
| cg09111258 | 17 | 46114933  | COPZ2;MIR152                           | 0.0261496   | 0.650423618550959    | 0.0827226567216581 |
| cg08611430 | 5  | 137801033 | EGR1                                   | 0.00954145  | 0.475832761082719    | 0.0827226567216581 |
| cg21381136 | 1  | 8445818   | REER;REER;REER                         | -0.0496645  | -0.0867873992600977  | 0.0827226567216581 |
| cg04242710 | 2  | 201729573 | CLK1;CLK1;CLK1;CLK1                    | 0.00846506  | 0.459852045228263    | 0.0827226567216581 |
| cg09432409 | 5  | 66540037  |                                        | -0.0444966  | -0.079149948389083   | 0.0827226567216581 |
| cg24964915 | 3  | 196676228 | PIGZ                                   | -0.00343297 | -0.00514744072614754 | 0.0827672357731161 |
| cg11948381 | 11 | 47574185  | CUGBP1                                 | 0.0101686   | 0.551828287527866    | 0.0828165505546208 |
| cg20906495 | 6  | 150238016 | RAET1G                                 | -0.0124432  | -0.0186115740640604  | 0.0828165505546208 |
| cg23721088 | 10 | 80955256  | ZMI2                                   | 0.0314327   | 0.659191906637322    | 0.0828165505546208 |
| cg07771804 | 19 | 2268130   | OAZ1;OAZ1                              | -0.0293611  | -0.0451694844165123  | 0.0828165505546208 |
| cg02457826 | 20 | 30310733  | BCL2L1;BCL2L1                          | 0.0174219   | 0.554132472611083    | 0.0828165505546208 |
| cg25742745 | 6  | 30689865  | TUBB                                   | 0.0238511   | 0.4085054619095484   | 0.0828165505546208 |
| cg24790837 | 7  | 138838713 | TTC26;TTC26;TTC26;TTC26                | -0.0751173  | -0.172908168312305   | 0.0829472074408977 |
| cg02463426 | 19 | 16683387  | SLC35E1                                | 0.0288036   | 0.661635532738922    | 0.0829472074408977 |
| cg12934646 | 6  | 159466962 | TAGAP;TAGAP;TAGAP                      | -0.0172336  | -0.0260066413583102  | 0.0829472074408977 |
| cg21239269 | 8  | 7759257   | ZFHX4;ZFHX4-AS1                        | -0.0308249  | -0.0515013439002157  | 0.0829878902353803 |
| cg04558100 | 2  | 73521030  | EGR4                                   | 0.00495357  | 0.36156198218457     | 0.0830056722905755 |
| cg10671572 | 6  | 150071503 | PCMT1                                  | -0.0715477  | -0.447011663681616   | 0.083013465099289  |
| cg26375263 | 14 | 76843202  | ESRRB                                  | 0.0133844   | 0.531982752534643    | 0.0830275998867893 |
| cg02620189 | 19 | 40927363  |                                        | 0.0115332   | 0.511227994799562    | 0.0830275998867893 |
| cg02447122 | 2  | 25142523  | ADCY3                                  | 0.0228618   | 0.607951903886269    | 0.0830275998867893 |
| cg09987128 | 9  | 84602238  | SPATA31D1                              | -0.0600265  | -0.106648214293578   | 0.0830275998867893 |
| cg05881034 | 3  | 42623675  | SEC22C;SEC22C                          | 0.035026    | 0.865388230581578    | 0.0830275998867893 |
| cg22159483 | 17 | 1588198   | PRPF8                                  | 0.0340283   | 0.562912268450687    | 0.0830275998867893 |
| cg11208039 | 11 | 19138753  | ZDHHC13;ZDHHC13;ZDHHC13;ZDHHC13        | 0.0207132   | 0.760499235619559    | 0.0830275998867893 |
| cg02052142 | 14 | 60794866  |                                        | 0.0120448   | 0.459255403827944    | 0.0830275998867893 |
| cg12991306 | 8  | 27941405  | C8orf80                                | -0.0682108  | -0.157644472302921   | 0.0830275998867893 |
| cg26646953 | 17 | 17183928  | COP3;COP3;COP3                         | 0.00595722  | 0.398861152352408    | 0.0830275998867893 |
| cg19280901 | 2  | 173443071 | PKD1;PKD1;PKD1;PKD1                    | -0.0605119  | -0.101062726213287   | 0.0830275998867893 |
| cg03621258 | 6  | 31613356  | BAG6;BAG6;BAG6;BAG6;BAG6               | 0.0135789   | 0.0205475987483601   | 0.0830275998867893 |
| cg07018260 | 11 | 10536864  | RNF141                                 | -0.0805562  | -0.157089415935475   | 0.0830275998867893 |
| cg11651785 | 8  | 38244580  | LETM2;LETM2;LETM2;LETM2;LETM2          | 0.0232411   | 0.541056303982229    | 0.0830275998867893 |
| cg06179586 | 6  | 29969539  | NCRNA00171                             | -0.0389152  | -0.0619979127947119  | 0.0830275998867893 |
| cg04414295 | 14 | 102606318 | WDR20;WDR20;HSP90AA1;WDR20;WDR20;WDR20 | 0.0298423   | 0.985467245323967    | 0.0830715021864001 |
| cg16252691 | 12 | 94498285  |                                        | -0.0807518  | -0.163863410265057   | 0.0830760503717604 |
| cg14787483 | 22 | 39052528  | LOC646851;LOC646851;CBY1;CBY1          | 0.0056473   | 0.444407843165318    | 0.0830760503717604 |
| cg06783524 | 2  | 208460831 | CREB1;CREB1;METTL21A                   | -0.0413281  | -0.0650338883331018  | 0.0830760503717604 |
| cg05141147 | 12 | 113903386 | LHX5                                   | 0.0156698   | 0.516893135867065    | 0.0830760503717604 |
| cg12570942 | 2  | 242626270 | DTYMK;DTYMK;DTYMK;DTYMK;DTYMK          | 0.00975274  | 0.40908647927806     | 0.0830760503717604 |
| cg10819560 | 15 | 63774509  |                                        | -0.0709449  | -0.149636781063621   | 0.0830760503717604 |
| cg01301842 | 5  | 156815746 | CYFIP2;CYFIP2;CYFIP2;CYFIP2            | -0.0467203  | -0.0845666775214475  | 0.0830760503717604 |
| cg08344341 | 5  | 36151993  | LMBRD2;SKP2;SKP2;LMBRD2                | 0.0100576   | 0.550848585119506    | 0.0830760503717604 |
| cg08311403 | 11 | 124735215 | ROBO3                                  | 0.00443218  | 0.326536332048526    | 0.0830760503717604 |
| cg12128610 | 7  | 66057395  |                                        | 0.00924661  | 0.521415237518467    | 0.0830760503717604 |
| cg13286692 | 2  | 3137500   |                                        | -0.0444516  | -0.0722423532429183  | 0.0830760503717604 |
| cg20481419 | 12 | 79850430  | MIR5692B                               | -0.0679656  | -0.119387159138368   | 0.0830760503717604 |
| cg12109968 | 20 | 50383676  | ATP9A                                  | 0.0295197   | 0.59372797272614     | 0.0830760503717604 |
| cg01188936 | 12 | 80084361  | PAWR                                   | 0.0104067   | 0.788364165616603    | 0.0830760503717604 |
| cg27386413 | 2  | 3473947   | TRAPPC12                               | 0.00476681  | 0.00705228143736225  | 0.0830760503717604 |
| cg12266151 | 20 | 33291892  | TP53INP2                               | 0.0102399   | 0.387300026935974    | 0.0830760503717604 |
| cg17829401 | 3  | 9975317   | CRELD1;CRELD1;CRELD1                   | 0.0130554   | 0.453803383718048    | 0.0830903758532303 |
| cg19582614 | 12 | 4381894   | CCND2                                  | 0.0154002   | 0.374105874276336    | 0.0830903758532303 |
| cg11220663 | 2  | 70994863  | ADD2;ADD2;ADD2;ADD2;ADD2               | 0.0898115   | 0.822145579819572    | 0.0831928480211502 |
| cg26519799 | 19 | 55897819  | RPL28;RPL28;RPL28;RPL28;RPL28          | 0.00585738  | 0.600817947779366    | 0.0831928480211502 |
| cg09418792 | 9  | 123555852 | FBXW2;LOC100288842                     | 0.019941    | 0.740651580163056    | 0.0833421938001392 |
| cg09526912 | 2  | 45237431  | SIX2                                   | 0.033338    | 0.448192801034516    | 0.0833561423403011 |
| cg04361145 | 9  | 123964183 | RAB14;RAB14                            | 0.0276563   | 1.11964557425822     | 0.0833664672878077 |
| cg03783420 | 9  | 36400446  | RNF38;RNF38;RNF38;RNF38;RNF38          | 0.00806     | 0.452800498351718    | 0.0833725400522609 |
| cg20773005 | 16 | 79436422  |                                        | 0.0168042   | 0.0259246556035678   | 0.0833725400522609 |
| cg04342230 | 11 | 8986449   | TMEM9B;TMEM9B;TMEM9B;TMEM9B;TMEM9B-AS1 | 0.0329448   | 0.94275749668362     | 0.0833725400522609 |
| cg01216412 | 12 | 110011396 | MMAB;MVK;MVK                           | 0.00783003  | 0.456236872315906    | 0.0833725400522609 |
| cg05516012 | 11 | 73019501  | ARHGEF17                               | 0.00973739  | 0.681477517213723    | 0.0833725400522609 |
| cg17262065 | 7  | 39653641  |                                        | -0.0606388  | -0.111294436870692   | 0.0833725400522609 |
| cg22034943 | 11 | 65383239  | PCNXL3                                 | 0.0177889   | 0.919770321386434    | 0.0833725400522609 |
| cg22820285 | 1  | 55008241  |                                        | 0.00858018  | 0.441056385103066    | 0.0833725400522609 |



|            |    |           |                                            |             |                      |                    |
|------------|----|-----------|--------------------------------------------|-------------|----------------------|--------------------|
| cg26574964 | 11 | 117049906 | SIDT2                                      | 0.0248764   | 0.389294691298255    | 0.0833725400522609 |
| cg24069674 | 6  | 27230661  |                                            | -0.0217953  | -0.0330170684622633  | 0.0833725400522609 |
| cg18040305 | 6  | 64281886  | PTP4A1                                     | 0.00691951  | 0.477329707510734    | 0.0833725400522609 |
| cg12591986 | 16 | 14368115  |                                            | -0.0580962  | -0.102349935812084   | 0.0833725400522609 |
| cg20630240 | 16 | 66771590  | DYNC1L1;DYNC1L2                            | 0.00931224  | 0.0140219801217293   | 0.0833725400522609 |
| cg17301114 | 2  | 72971072  | EXOC6B                                     | -0.0375654  | -0.0604222276059503  | 0.0833725400522609 |
| cg03920061 | 10 | 21598708  |                                            | -0.0354589  | -0.055629912935175   | 0.0833725400522609 |
| cg19301602 | 3  | 46855194  |                                            | -0.0953141  | -0.182507551676389   | 0.0833725400522609 |
| cg24799909 | 5  | 145724482 |                                            | 0.0248505   | 0.761710023737104    | 0.0833725400522609 |
| cg25879102 | 1  | 38600119  |                                            | 0.00812857  | 0.419940934853229    | 0.0833725400522609 |
| cg16974433 | 11 | 35198159  | CD44;CD44;CD44;CD44;CD44;CD44;CD44         | -0.00538291 | -0.00791601126277003 | 0.0833725400522609 |
| cg09127400 | 6  | 30712331  | IER3                                       | 0.0100624   | 0.645549736307309    | 0.0833725400522609 |
| cg15463803 | 4  | 113436765 | NEUROG2                                    | 0.018642    | 0.516724748156769    | 0.0833725400522609 |
| cg03920887 | 1  | 205616632 |                                            | -0.0293076  | -0.0454097575094518  | 0.0833725400522609 |
| cg09699605 | 12 | 57023789  | BAZ2A                                      | 0.0403977   | 1.27392211495586     | 0.0833725400522609 |
| cg12822972 | 9  | 33524289  | ANKRD18B                                   | 0.0499308   | 0.545183129446102    | 0.0833725400522609 |
| cg20165111 | 11 | 77300425  | AQP11                                      | 0.0140728   | 0.851354817841712    | 0.0833725400522609 |
| cg10922289 | 11 | 62648720  | SLC3A2;SLC3A2;SLC3A2;SLC3A2;SLC3A2         | 0.0128911   | 0.453417577992804    | 0.0833725400522609 |
| cg01353464 | 3  | 38180116  | ACAA1;ACAA1;ACAA1;MYD88;MYD88              | 0.0476781   | 0.42379841776588     | 0.0833725400522609 |
| cg16659151 | 3  | 136233959 | STAG1                                      | -0.0687218  | -0.136858822984607   | 0.0833725400522609 |
| cg24856732 | 22 | 50963486  | SCO2;SCO2;SCO2;SCO2                        | 0.0225488   | 0.688270665879336    | 0.0833725400522609 |
| cg01654862 | 3  | 159480947 | SCHIP1                                     | 0.00951961  | 0.592525046687337    | 0.0833725400522609 |
| cg07767421 | 16 | 5059086   | SEC14L5                                    | -0.0381349  | -0.0631956051001044  | 0.0833725400522609 |
| cg17597744 | 8  | 53627099  | RB1CC1;RB1CC1                              | 0.0412609   | 0.874964355258341    | 0.0833725400522609 |
| cg00124488 | 6  | 31509762  | BAT1;BAT1;SNORD84;BAT1;BAT1                | 0.0152234   | 0.502115817990528    | 0.0833725400522609 |
| cg19377127 | 22 | 41033281  | MKL1                                       | 0.0111326   | 0.448944997787091    | 0.0833725400522609 |
| cg26925343 | 16 | 28857904  | TUFM                                       | 0.0258541   | 0.6450117166759124   | 0.0833725400522609 |
| cg07625039 | 5  | 153817206 | SAP30L-AS1                                 | -0.077594   | -0.145162369183246   | 0.0833725400522609 |
| cg16162734 | 2  | 149543956 | EPC2                                       | -0.0240513  | -0.0369194026991435  | 0.0833725400522609 |
| cg22281380 | 7  | 50861467  | GRB10                                      | 0.0109443   | 0.3408480039869      | 0.0833725400522609 |
| cg08443851 | 16 | 85646773  | KIAA0182;KIAA0182                          | 0.0410547   | 0.801261216225541    | 0.0833725400522609 |
| cg05402641 | 2  | 180899188 |                                            | -0.0536365  | -0.0902786115361921  | 0.0833725400522609 |
| cg11675409 | 15 | 44083712  | SERF2                                      | -0.0470495  | -0.0831325428654862  | 0.0833725400522609 |
| cg14438736 | 3  | 171617543 | TMEM212-AS1                                | -0.0360007  | -0.0659015298315747  | 0.0833725400522609 |
| cg16182055 | 5  | 137879011 | ETF1                                       | 0.0159507   | 0.536771260245784    | 0.0833725400522609 |
| cg07283152 | 11 | 8284997   | LMO1;LMO1                                  | 0.0377396   | 0.565877301407896    | 0.0833725400522609 |
| cg06936006 | 7  | 133074606 | EXOC4;EXOC4                                | -0.0373305  | -0.0593156225458457  | 0.0833725400522609 |
| cg10059378 | 16 | 4817345   | ZNF500                                     | 0.0166122   | 0.653701272830046    | 0.0833725400522609 |
| cg02641865 | 1  | 40595336  |                                            | -0.0674273  | -0.114684516454897   | 0.0833725400522609 |
| cg18560247 | 4  | 78071590  |                                            | -0.0583263  | -0.0975655510917974  | 0.0833725400522609 |
| cg19609713 | 12 | 6558051   | CD27;CD27-AS1                              | -0.031589   | -0.0514744624909787  | 0.0833725400522609 |
| cg03766306 | 1  | 90461091  | LOC492303;ZNF326;ZNF326                    | 0.0102273   | 0.495931977454571    | 0.0833725400522609 |
| cg24390820 | 12 | 131189380 |                                            | -0.0347968  | -0.0600532665865005  | 0.0833725400522609 |
| cg12225467 | 1  | 40372098  |                                            | -0.0315278  | -0.0555217861498529  | 0.0833725400522609 |
| cg03602124 | 1  | 113258101 | PPM1J                                      | 0.00985216  | 0.496148320993016    | 0.0833725400522609 |
| cg11698099 | 16 | 67695462  | PARD6A;ACD;ACD;PARD6A;ACD                  | 0.0219023   | 0.371679613298036    | 0.0833725400522609 |
| cg23272668 | 11 | 11863629  | USP47;USP47                                | 0.00818363  | 0.453163522984503    | 0.0833725400522609 |
| cg09847415 | 22 | 40633982  | TNRC6B;TNRC6B;TNRC6B                       | 0.00601837  | 0.00885840270841351  | 0.0833725400522609 |
| cg03410961 | 6  | 391680    | IRF4                                       | 0.0293469   | 0.431897875610589    | 0.0833725400522609 |
| cg02962095 | 1  | 145590829 | NUDT17;POLR3C;POLR3C;NBPF20;NBPF10;NBPF10  | -0.0679011  | -0.121639139102579   | 0.0833725400522609 |
| cg19516041 | 4  | 125633907 | ANKRD50;ANKRD50                            | 0.0479679   | 0.436488972741971    | 0.0833725400522609 |
| cg14163444 | 7  | 99595348  |                                            | 0.0183614   | 0.429474427292951    | 0.0833725400522609 |
| cg06898080 | 12 | 111807837 | FAM109A;FAM109A;FAM109A                    | -0.0389715  | -0.0686193344742079  | 0.0833725400522609 |
| cg27556913 | 4  | 1341059   | KIAA1530                                   | 0.00743212  | 0.400474738205833    | 0.0833725400522609 |
| cg06006168 | 12 | 53893448  | TARBP2;TARBP2;MAP3K12;MAP3K12              | 0.0437873   | 0.490755020098989    | 0.0833725400522609 |
| cg09397900 | 16 | 2070528   | NPW                                        | 0.0117193   | 0.635725189959481    | 0.0833725400522609 |
| cg07226281 | 16 | 1756622   | MAPK8IP3;MAPK8IP3                          | 0.0180733   | 0.731329622844781    | 0.0833725400522609 |
| cg24180066 | 19 | 56632673  | ZNF787                                     | 0.0188708   | 0.534560116036689    | 0.0833725400522609 |
| cg22323350 | 5  | 65222292  | ERBB2IP;ERBB2IP;ERBB2IP;ERBB2IP;ERBB2IP    | 0.0305969   | 0.598020075794159    | 0.0833725400522609 |
| cg26085714 | 1  | 245133458 | LOC101928068;EFCAB2;EFCAB2;EFCAB2          | 0.0346068   | 0.311466688694982    | 0.0833725400522609 |
| cg01637377 | 17 | 8567313   |                                            | -0.045466   | -0.0782325039390296  | 0.0833725400522609 |
| cg17172090 | 6  | 2926650   |                                            | -0.0486456  | -0.105488035111673   | 0.0833725400522609 |
| cg12234226 | 6  | 90932450  | BACH2;BACH2                                | -0.0719529  | -0.170262264468707   | 0.0833725400522609 |
| cg04429367 | 13 | 113939322 |                                            | -0.0231369  | -0.0357570145110977  | 0.0833725400522609 |
| cg16713009 | 19 | 44223436  | IRGC                                       | -0.011817   | -0.017729466182903   | 0.0833725400522609 |
| cg11564042 | 3  | 150479915 | SIAH2                                      | 0.0453938   | 0.599585050658647    | 0.0833725400522609 |
| cg15586420 | 15 | 90294517  | MESP1;MESP1                                | 0.0320407   | 0.578660332685478    | 0.0833725400522609 |
| cg11276193 | 17 | 33570022  | SLFN5                                      | 0.00405065  | 0.348497958548859    | 0.0833725400522609 |
| cg06206471 | 16 | 4364052   |                                            | 0.00786357  | 0.357934797517731    | 0.0833725400522609 |
| cg23310839 | 18 | 19180999  | ESCO1                                      | 0.0137582   | 0.513019416254461    | 0.0833725400522609 |
| cg18772071 | 4  | 89618324  | NAP1L5;HERC3;NAP1L5                        | 0.0475084   | 0.14191549250715     | 0.0833725400522609 |
| cg15012981 | 1  | 11741009  | MAD2L2;MAD2L2                              | 0.0284272   | 1.36979192096249     | 0.0833725400522609 |
| cg21572957 | 3  | 195564748 |                                            | -0.0307498  | -0.0486843633998462  | 0.0833725400522609 |
| cg19398269 | 6  | 28678460  |                                            | -0.0178915  | -0.0513568222309907  | 0.0833725400522609 |
| cg08563487 | 20 | 2633027   | MIR1292;NOP56;NOP56                        | 0.0244304   | 0.930312733035727    | 0.0833725400522609 |
| cg18221711 | 8  | 103963195 | AZIN1-AS1;AZIN1-AS1                        | -0.0168011  | -0.0252225020504621  | 0.0833725400522609 |
| cg10457504 | 17 | 19281708  | MAPK7;MAPK7;MAPK7;MAPK7                    | 0.016734    | 0.342564415680892    | 0.0833725400522609 |
| cg16524332 | 4  | 3075655   | HTT                                        | 0.0190139   | 0.626461447590942    | 0.0833725400522609 |
| cg27619163 | 17 | 7982806   | ALOX12B                                    | 0.0438988   | 1.47398467306146     | 0.0833725400522609 |
| cg15337463 | 20 | 5930963   | TRMT6;MCM8;MCM8;MCM8;MCM8;MCM8;TRMT6;TRMT6 | 0.00664117  | 0.472729789534546    | 0.0833725400522609 |
| cg00521887 | 18 | 39535162  | PIK3C3                                     | 0.00848368  | 0.401682394537633    | 0.0833725400522609 |
| cg08658318 | 21 | 46351329  |                                            | 0.0111574   | 0.628944415192806    | 0.0833725400522609 |

|            |    |           |                                                           |             |                      |                    |
|------------|----|-----------|-----------------------------------------------------------|-------------|----------------------|--------------------|
| cg12900061 | 15 | 43199409  | TTBK2                                                     | -0.0590267  | -0.100700830697853   | 0.0833725400522609 |
| cg26673151 | 17 | 37887607  | C1orf37                                                   | -0.0594203  | -0.101298186464133   | 0.0833725400522609 |
| cg22652733 | 10 | 74452328  | MCU;MCU;MCU;MCU                                           | 0.0240286   | 0.618372104171829    | 0.0833725400522609 |
| cg11716640 | 1  | 113933411 | MAG3;MAG3                                                 | 0.0252324   | 0.638488556012157    | 0.0833725400522609 |
| cg11187916 | 1  | 145562715 | ANKRD35                                                   | 0.0232791   | 0.398500674001206    | 0.0833725400522609 |
| cg16676952 | 20 | 62612301  | SAMD10;PRPF6                                              | 0.00519287  | 0.419352289187401    | 0.0833725400522609 |
| cg08268585 | 5  | 34839194  | TTC23L                                                    | 0.00731758  | 0.491125988590222    | 0.0833725400522609 |
| cg10625705 | 20 | 307320    | SOX12                                                     | 0.0189134   | 0.421383061857904    | 0.0833725400522609 |
| cg19850545 | 22 | 41347463  | RBX1                                                      | 0.0253571   | 0.754544200663347    | 0.0833725400522609 |
| cg13240253 | 3  | 71245529  | FOXP1                                                     | -0.0614645  | -0.10344410795125    | 0.0833725400522609 |
| cg08125574 | 4  | 186058542 |                                                           | -0.0165553  | -0.0249982865485147  | 0.0833725400522609 |
| cg08889009 | 15 | 59157123  |                                                           | 0.0652604   | 0.293072599021368    | 0.0833725400522609 |
| cg01181053 | 11 | 57425124  | CLP1;CLP1                                                 | 0.00824547  | 0.543685028518982    | 0.0833725400522609 |
| cg12608603 | 14 | 91926636  | PPP4R3A;PPP4R3A                                           | -0.0510828  | -0.0882495798576423  | 0.0833725400522609 |
| cg08694699 | 16 | 68270282  | ESRP2                                                     | 0.0210494   | 0.526826674351028    | 0.0833725400522609 |
| cg04369964 | 11 | 63997586  | DNAJC4                                                    | 0.0122899   | 0.323518293140393    | 0.0833725400522609 |
| cg02294570 | 12 | 122362615 | WDR66                                                     | -0.0580236  | -0.159934729171523   | 0.0833725400522609 |
| cg05711145 | 16 | 84224633  | ADAD2;ADAD2                                               | -0.0174531  | -0.0273953148825945  | 0.0833725400522609 |
| cg12811797 | 3  | 156392549 | TIPARP-AS1;TIPARP;TIPARP;TIPARP                           | 0.0301031   | 0.711724984193679    | 0.0833725400522609 |
| cg13486309 | 1  | 155329113 | ASH1L                                                     | -0.0867555  | -0.16659806458086    | 0.0833725400522609 |
| cg18976974 | 8  | 103990325 |                                                           | -0.0567376  | -0.0951867048336709  | 0.0833725400522609 |
| cg23091741 | 1  | 226111643 | PYCR2                                                     | 0.0263246   | 0.71679840567618     | 0.0833725400522609 |
| cg00730780 | 10 | 30316187  | KIAA1462                                                  | 0.016088    | 0.939499930569006    | 0.0833725400522609 |
| cg07776847 | 4  | 140201065 | C4orf49                                                   | 0.00445435  | 0.336372342822438    | 0.0833725400522609 |
| cg11124980 | 7  | 105925837 | NAMPT                                                     | 0.0173671   | 0.679055786570676    | 0.0833725400522609 |
| cg13373321 | 12 | 49076048  | C12orf41                                                  | 0.00873496  | 0.751097734377905    | 0.0833725400522609 |
| cg07961283 | 21 | 36261057  | RUNX1;RUNX1;RUNX1                                         | 0.0309447   | 1.00532089791503     | 0.0833725400522609 |
| cg06703062 | 1  | 31191648  | MATN1                                                     | 0.0380348   | 1.74751298937554     | 0.0833725400522609 |
| cg15685834 | 1  | 18970180  | PAX7;PAX7;PAX7                                            | 0.0110904   | 0.399868968217708    | 0.0833725400522609 |
| cg22008625 | 8  | 10588386  | SOX7                                                      | 0.00884163  | 0.371629712560382    | 0.0833725400522609 |
| cg03213505 | 9  | 139025831 |                                                           | 0.0325334   | 0.571192578400538    | 0.0833725400522609 |
| cg07697635 | 5  | 77656183  | SCAMP1                                                    | 0.00645489  | 0.584779340821793    | 0.0833725400522609 |
| cg05995220 | 20 | 55964998  | RBM38;RBM38                                               | 0.0299379   | 0.319630483552036    | 0.0833725400522609 |
| cg14846380 | 12 | 125333322 | SCARB1;SCARB1                                             | 0.00316544  | 0.00465349083505806  | 0.0833725400522609 |
| cg13324603 | 17 | 74733680  | MFSD11;MIR636;SRSF2;SRSF2;SRSF2;MFS11;MFS11;MFS11;MFS11;M | 0.0761916   | 1.73469821846795     | 0.0833725400522609 |
| cg13530292 | 19 | 42721476  | DEDD2                                                     | 0.00797382  | 0.556375314213312    | 0.0833725400522609 |
| cg02999208 | 15 | 42183840  | SPTBN5                                                    | -0.0507754  | -0.0941834490789406  | 0.0833725400522609 |
| cg22535773 | 10 | 98461202  | PIK3AP1                                                   | -0.0564105  | -0.111056189027515   | 0.0833725400522609 |
| cg12899157 | 18 | 3452302   | TGIF1;TGIF1;TGIF1;TGIF1;TGIF1;TGIF1;TGIF1                 | 0.0163455   | 0.69277129872911     | 0.0833725400522609 |
| cg14855607 | 14 | 74706891  | VSX2                                                      | 0.0276689   | 0.337519671635716    | 0.0833725400522609 |
| cg02215960 | 3  | 50607131  | HEMK1                                                     | 0.0164404   | 0.828652184831434    | 0.0833725400522609 |
| cg24356321 | 1  | 186344702 | TPR;C1orf27;MIR548F1;C1orf27;C1orf27                      | 0.0245213   | 0.689746230096153    | 0.0833725400522609 |
| cg12915591 | 11 | 43965360  | LOC387763;LOC387763                                       | 0.010486    | 0.778995200362352    | 0.0833725400522609 |
| cg01061575 | 22 | 45098367  | PRR5-ARHGAP8;PRR5;PRR5;PRR5;PRR5                          | 0.0172111   | 0.410923867451485    | 0.0833734077776146 |
| cg11736539 | 6  | 36838237  | C6orf89;PPIL1                                             | -0.0197076  | -0.0296536794648711  | 0.0834162432682024 |
| cg24729481 | 1  | 43833600  | ELOVL1;ELOVL1                                             | 0.0175255   | 0.760215402032836    | 0.0834162432682024 |
| cg15991309 | 17 | 80291688  | SECTM1;SECTM1                                             | 0.0155124   | 0.601268647288977    | 0.0834162432682024 |
| cg04938152 | 17 | 17888990  | LRRC48;LRRC48;LRRC48;LRRC48                               | -0.0441344  | -0.0829441897190523  | 0.0834360043272571 |
| cg04924415 | 12 | 100661456 | SCYL2;DEPDC4                                              | 0.0433909   | 0.592545775873789    | 0.0834360043272571 |
| cg10949583 | 2  | 179343740 | FKBP7;FKBP7;PLEKHA3;MIR548N                               | 0.00869655  | 0.459577241803645    | 0.0834360043272571 |
| cg10679714 | 8  | 145691133 | KIFC2;CYHR1;CYHR1;CYHR1                                   | 0.0550479   | 0.294409867650591    | 0.0834360043272571 |
| cg07207490 | 11 | 118492463 | PHLDB1;PHLDB1;PHLDB1                                      | -0.0524529  | -0.14342533729686    | 0.0834360043272571 |
| cg03045021 | 9  | 131644678 | LRRC8A;LRRC8A;LRRC8A;CCBL1;CCBL1;CCBL1;CCBL1;CCBL1        | 0.012535    | 0.578585815255556    | 0.0834892971239766 |
| cg17426237 | 10 | 51463156  |                                                           | -0.0403205  | -0.0675961844558074  | 0.0835887417406499 |
| cg09130192 | 2  | 10161320  |                                                           | -0.072839   | -0.137544927217011   | 0.0835887417406499 |
| cg04095923 | 21 | 37839286  | CLDN14;CLDN14;CLDN14;CLDN14;CLDN14                        | -0.00916844 | -0.013554743884011   | 0.0835887417406499 |
| cg02744670 | 4  | 2470688   | RNF4;RNF4;RNF4                                            | 0.0821127   | 1.15101203586061     | 0.0836395973810918 |
| cg16015797 | 17 | 73021048  |                                                           | -0.0560811  | -0.0939266009026822  | 0.0836395973810918 |
| cg06138422 | 12 | 133338013 | ANKLE2                                                    | 0.0247259   | 0.627887346606007    | 0.083646584198182  |
| cg12345609 | 1  | 110165150 | AMPD2;AMPD2;AMPD2;AMPD2;AMPD2                             | 0.0120763   | 0.0184782027570917   | 0.083646584198182  |
| cg19669078 | 3  | 42543564  | VIPR1;VIPR1;VIPR1;VIPR1;VIPR1                             | 0.0662763   | 1.09102470815522     | 0.083646584198182  |
| cg06952910 | 4  | 122744652 | CCNA2                                                     | 0.0176548   | 0.880854294010458    | 0.0836609040083184 |
| cg06677332 | 11 | 34074341  | CAPRIN1;CAPRIN1                                           | 0.0113836   | 0.43720283392758     | 0.0837705860438025 |
| cg26363634 | 1  | 110162485 | AMPD2;AMPD2;AMPD2                                         | 0.00909933  | 0.519598059526681    | 0.0838091144349962 |
| cg03785281 | 13 | 41241501  | FOXO1                                                     | 0.0223375   | 0.985933096273204    | 0.0838117917806502 |
| cg01801368 | 6  | 33281322  | TAPBP;TAPBP;TAPBP                                         | 0.0132752   | 0.573443008494097    | 0.0838507173041068 |
| cg26969288 | 1  | 200379157 | ZNF281;ZNF281;ZNF281;ZNF281;ZNF281                        | 0.0278536   | 1.00610953778486     | 0.0838840447910916 |
| cg02768671 | 6  | 169470822 |                                                           | -0.0391941  | -0.0625771097095596  | 0.0838840447910916 |
| cg24185998 | 5  | 176966237 | FAM193B;FAM193B                                           | -0.0530857  | -0.09439262213901789 | 0.0838840447910916 |
| cg25799897 | 10 | 73157222  | CDH23;CDH23                                               | 0.0243414   | 0.613182884068121    | 0.0838840447910916 |
| cg18562663 | 3  | 187455516 | BCL6;BCL6                                                 | 0.0114194   | 0.461380203729008    | 0.0838840447910916 |
| cg07031532 | 15 | 64995684  | OAZ2                                                      | 0.0231399   | 0.862993791231587    | 0.0838840447910916 |
| cg00334349 | 7  | 127928611 |                                                           | -0.0587361  | -0.0969514939965768  | 0.0838840447910916 |
| cg24769167 | 19 | 1205715   | STK11                                                     | 0.00801077  | 0.71553130677569     | 0.0838840447910916 |
| cg10783797 | 7  | 150930536 | CHPF2;CHPF2                                               | 0.0368857   | 0.702817402040935    | 0.0839041611329158 |
| cg12553947 | 5  | 114486604 | TRIM36;TRIM36;TRIM36                                      | -0.0238952  | -0.043879725477827   | 0.0839041611329158 |
| cg07124148 | 8  | 103876083 | AZIN1-AS1;AZIN1-AS1;AZIN1;AZIN1;AZIN1;AZIN1;AZIN1         | 0.0120733   | 0.903234594465224    | 0.0839041611329158 |
| cg08495027 | 22 | 31364830  | MORC2;TUG1                                                | 0.0115402   | 0.313021105191562    | 0.0839041611329158 |
| cg11902278 | 10 | 29976135  | SVIL                                                      | -0.0511763  | -0.0891753033892618  | 0.0839903740877992 |
| cg14913644 | 19 | 11530065  | RGL3;RGL3                                                 | 0.0133908   | 0.431208047176713    | 0.0839903740877992 |
| cg07851057 | 5  | 70751686  | BDP1;BDP1                                                 | 0.0342026   | 0.847180108786429    | 0.0839903740877992 |
| cg17004038 | 12 | 109532235 | ALKBH2;ALKBH2;ALKBH2;ALKBH2                               | -0.0317473  | -0.0526482920982228  | 0.0839903740877992 |

|            |    |           |                                           |            |                     |                    |
|------------|----|-----------|-------------------------------------------|------------|---------------------|--------------------|
| cg18585246 | 8  | 1041929   |                                           | -0.0250456 | -0.039203691725455  | 0.0839903740877992 |
| cg07483245 | 15 | 23034598  | NIPA2;NIPA2;NIPA2;NIPA2                   | 0.0232644  | 0.538852204177276   | 0.0839903740877992 |
| cg02908709 | 3  | 111578238 | PHLDB2;PHLDB2;PHLDB2;PHLDB2;PHLDB2;PHLDB2 | 0.0103663  | 0.723113188958304   | 0.0839903740877992 |
| cg11487977 | 19 | 9879695   | ZNF846                                    | 0.00689817 | 0.453544684595543   | 0.0839903740877992 |
| cg02386983 | 2  | 86669112  | KDM3A;KDM3A                               | 0.0159127  | 0.646635534409444   | 0.0839903740877992 |
| cg12118798 | 7  | 155170624 |                                           | 0.0147269  | 0.40561711789387    | 0.0839903740877992 |
| cg26095266 | 2  | 10262787  | RRM2;RRM2                                 | 0.0196987  | 0.61583360012115    | 0.0839903740877992 |
| cg16195284 | 14 | 24112375  | DHRS2;DHRS2;DHRS2;DHRS2                   | -0.0468715 | -0.0958575475711064 | 0.0839903740877992 |
| cg04265971 | 4  | 2470698   | RNF4                                      | 0.0265606  | 1.37616161531596    | 0.0839903740877992 |
| cg03438090 | 2  | 239143093 |                                           | 0.0178874  | 0.710600350307186   | 0.0839903740877992 |
| cg27245656 | 18 | 48572727  | SMAD4                                     | -0.0702727 | -0.130668036315451  | 0.0839903740877992 |
| cg05267587 | 17 | 29233478  | C17orf42                                  | 0.00568593 | 0.475340737252469   | 0.0839903740877992 |
| cg13190306 | 11 | 18415923  | LDHA;LDHA;LDHA;LDHA;LDHA                  | 0.00948639 | 0.483846839892065   | 0.0839903740877992 |
| cg14986651 | 2  | 73430289  | NOTO                                      | 0.0126717  | 0.490746204372189   | 0.0839903740877992 |
| cg21778743 | 2  | 24397871  | FAM228A                                   | 0.0968341  | 0.678542131224148   | 0.0839903740877992 |
| cg17742155 | 9  | 117350088 | ATP6V1G1;ATP6V1G1                         | 0.00672984 | 0.511269410818003   | 0.0839903740877992 |
| cg06485000 | 17 | 78881721  | RPTOR;RPTOR                               | 0.0101815  | 0.0153908617372161  | 0.0839903740877992 |
| cg06349981 | 2  | 10443745  | HPCAL1;HPCAL1                             | 0.046019   | 0.911222740029476   | 0.0839903740877992 |
| cg25869267 | 1  | 164319588 |                                           | -0.0665066 | -0.120147617988513  | 0.0839903740877992 |
| cg21498653 | 3  | 55521852  | WNT5A                                     | 0.00663123 | 0.516488949783199   | 0.0839903740877992 |
| cg17886847 | 14 | 23045367  | DAD1                                      | -0.0208915 | -0.0319914122992349 | 0.0839903740877992 |
| cg26662703 | 1  | 196856446 | CFHR4;CFHR4;CFHR4                         | -0.0452774 | -0.0861309348619261 | 0.0839903740877992 |
| cg13017229 | 16 | 58663923  | CNOT1;CNOT1;CNOT1;CNOT1                   | 0.0151568  | 0.782608446579742   | 0.0839903740877992 |
| cg07102474 | 17 | 61499248  | TANC2                                     | 0.0114883  | 0.0171709829549236  | 0.0839903740877992 |
| cg19831351 | 5  | 153589239 | GALNT10                                   | -0.0383838 | -0.0623864000084203 | 0.0839903740877992 |
| cg00834319 | 14 | 64970752  | ZBTB25;ZBTB1;ZBTB1                        | 0.0163815  | 0.752915360429391   | 0.0839903740877992 |
| cg07172280 | 9  | 140009455 | DPP7                                      | 0.00571618 | 0.482903636609586   | 0.0839903740877992 |
| cg07904175 | 19 | 16911472  | NWD1;NWD1                                 | -0.0278351 | -0.0428866057300234 | 0.0839903740877992 |
| cg26791384 | 16 | 77246057  | SYCE1L                                    | 0.0259896  | 0.789634819227007   | 0.0839903740877992 |
| cg19526740 | 19 | 58142253  |                                           | -0.0434507 | -0.095755126194666  | 0.0839903740877992 |
| cg23256829 | 10 | 134229731 | PWWP2B;PWWP2B                             | -0.0148224 | -0.0222893593430425 | 0.0839903740877992 |
| cg03509671 | 3  | 101497876 | FAM55C;FAM55C                             | 0.034198   | 1.29127137731632    | 0.0839903740877992 |
| cg13353015 | 1  | 34547254  | CSMD2                                     | -0.0365372 | -0.0644073235751115 | 0.0839903740877992 |
| cg17760982 | 11 | 13740479  | FAR1                                      | -0.0696517 | -0.129205218891225  | 0.0839903740877992 |
| cg06753949 | 19 | 15334309  |                                           | 0.042828   | 0.958751521890454   | 0.0839903740877992 |
| cg02039732 | 3  | 73039895  |                                           | -0.0446432 | -0.073495766430748  | 0.0839903740877992 |
| cg22751438 | 9  | 115333218 | KIAA1958;KIAA1958;KIAA1958                | -0.0757002 | -0.163734432811055  | 0.0839903740877992 |
| cg18809729 | 11 | 1302981   | TOLLIP                                    | 0.00334702 | 0.004885061618778   | 0.0839903740877992 |
| cg18490813 | 6  | 7625602   |                                           | -0.0592932 | -0.106090410093516  | 0.0839903740877992 |
| cg00523590 | 1  | 213123698 | VASH2;VASH2;VASH2;VASH2                   | 0.0148448  | 0.594855082668019   | 0.0839903740877992 |
| cg10865444 | 21 | 43136563  | C21orf129;NCRNA00112                      | 0.00628661 | 0.00981437682035521 | 0.0839903740877992 |
| cg04823492 | 10 | 97471301  | ENTPD1                                    | -0.0755024 | -0.146208654826359  | 0.0839903740877992 |
| cg08207994 | 7  | 157129685 | DNAJB6;DNAJB6                             | 0.037893   | 0.98024329818952    | 0.0839903740877992 |
| cg19268708 | 1  | 2837518   |                                           | -0.0392097 | -0.0686726956917393 | 0.0839903740877992 |
| cg11576513 | 6  | 114663692 |                                           | 0.0370017  | 1.40462291864273    | 0.0839903740877992 |
| cg05065765 | 3  | 38206519  | OXSRL1                                    | 0.0158687  | 0.632186132198928   | 0.0839903740877992 |
| cg23697417 | 20 | 982991    | RSPO4;RSPO4                               | 0.0204068  | 0.927642150846237   | 0.0839903740877992 |
| cg02717503 | 7  | 157213736 |                                           | 0.0571536  | 0.0945352499908809  | 0.0839903740877992 |
| cg20127188 | 22 | 21996426  | SDF2L1                                    | 0.0228381  | 0.982622428966665   | 0.0839903740877992 |
| cg15233711 | 11 | 13299315  | ARNTL;ARNTL;ARNTL                         | 0.0133494  | 0.415788115648002   | 0.0839903740877992 |
| cg15935527 | 18 | 74843715  | MBP;MBP                                   | 0.00976965 | 0.455120149237877   | 0.0839903740877992 |
| cg04737820 | 4  | 2010918   | NELFA;NELFA                               | 0.0308793  | 0.597771466730294   | 0.0839903740877992 |
| cg07086074 | 19 | 58049756  | ZNF549;ZNF549                             | -0.032112  | -0.049280223014192  | 0.0839903740877992 |
| cg10621559 | 9  | 131038338 | SWI5;GOLGA2                               | 0.0236805  | 1.02869384551871    | 0.0839903740877992 |
| cg21010566 | 7  | 105925537 | NAMPT;NAMPT                               | 0.00551169 | 0.37953562977184    | 0.0839903740877992 |
| cg24294159 | 1  | 150947566 | LASS2;LASS2                               | 0.0457155  | 1.22615668864335    | 0.0839903740877992 |
| cg13250541 | 2  | 27435095  | SLC5A6;SLC5A6;ATRAID;ATRAID;ATRAID;SLC5A6 | 0.0216713  | 1.01259565184609    | 0.0839903740877992 |
| cg00713252 | 1  | 9188947   | GPR157                                    | 0.0112546  | 0.437140051800659   | 0.0839903740877992 |
| cg24823920 | 20 | 9287042   | PLCB4;PLCB4;PLCB4                         | -0.0356224 | -0.0580700564045792 | 0.0839903740877992 |
| cg14283194 | 7  | 91763737  | CYP51A1;CYP51A1;CYP51A1                   | 0.0245913  | 1.03433035865741    | 0.0840028948184367 |
| cg02563827 | 1  | 8003721   | TNFRSF9                                   | -0.0529311 | -0.0852224923711474 | 0.0841102063847659 |
| cg08249556 | 21 | 30365104  | RNF160                                    | 0.0142259  | 0.498383919646073   | 0.0841102063847659 |
| cg13047843 | 7  | 101386679 |                                           | 0.0168501  | 0.95900118786769    | 0.0841102063847659 |
| cg19118037 | 17 | 6332115   | AIPL1;AIPL1;AIPL1;AIPL1;AIPL1;AIPL1;AIPL1 | -0.0542965 | -0.108208603922138  | 0.0841102063847659 |
| cg16396954 | 14 | 72398856  | RG56                                      | 0.0424897  | 0.501860250397312   | 0.0841102063847659 |
| cg12492289 | 21 | 47269180  | PCBP3;PCBP3                               | -0.0830225 | -0.177524976637053  | 0.0841102063847659 |
| cg06243263 | 6  | 84981475  |                                           | -0.0302175 | -0.0482976512833736 | 0.0841102063847659 |
| cg24260662 | 2  | 133281441 | GPR39                                     | -0.0498689 | -0.0927652338189243 | 0.084133541414546  |
| cg01807303 | 11 | 73495319  |                                           | -0.080926  | -0.23833358130163   | 0.084133541414546  |
| cg06717492 | 7  | 65447339  | GUSB                                      | 0.0283527  | 0.716080594546715   | 0.084133541414546  |
| cg18556005 | 15 | 41952440  | MGA;MGA                                   | 0.00800368 | 0.345430549992357   | 0.0842323360157694 |
| cg00580022 | 22 | 17639482  | CECR4;CECR5;CECR5;CECR4                   | 0.0344722  | 0.957881079013016   | 0.0842323360157694 |
| cg22169206 | 19 | 56136215  | ZNF784                                    | 0.00573005 | 0.296697693694097   | 0.0842323360157694 |
| cg10432104 | 9  | 137967290 | OLFM1;OLFM1;OLFM1;OLFM1                   | 0.0169003  | 0.507596041012502   | 0.0843818716779792 |
| cg14459319 | 4  | 144206376 |                                           | -0.0735792 | -0.153692321030872  | 0.0843818716779792 |
| cg19926630 | 4  | 1401854   |                                           | 0.0069985  | 0.334083020605987   | 0.0843818716779792 |
| cg21173351 | 5  | 4135244   |                                           | -0.0922159 | -0.156380534020476  | 0.0843818716779792 |
| cg18127410 | 11 | 9113184   | SCUBE2;SCUBE2                             | 0.0547202  | 0.798977769319846   | 0.0843818716779792 |
| cg03947261 | 12 | 64515314  | SRGAP1                                    | -0.0559914 | -0.0995744963925408 | 0.0843818716779792 |
| cg14230859 | 2  | 157291402 | GPD2;GPD2                                 | -0.0638872 | -0.114038715159106  | 0.0843818716779792 |
| cg16997101 | 1  | 21864590  | ALPL;ALPL;ALPL                            | -0.0631718 | -0.123273504867793  | 0.0844064739243959 |
| cg11520985 | 6  | 7313314   | SSR1                                      | 0.0184634  | 0.827375292067798   | 0.0844064739243959 |



|            |    |           |                                                 |             |                       |                    |
|------------|----|-----------|-------------------------------------------------|-------------|-----------------------|--------------------|
| cg11998173 | 5  | 107007752 | EFNA5                                           | 0.00686885  | 0.400671541518439     | 0.0847356131376682 |
| cg00300090 | 3  | 4345167   | SETMAR;SETMAR                                   | 0.044758    | 0.711077413594933     | 0.0847356131376682 |
| cg10577070 | 17 | 17942837  | GID4;ATPAF2                                     | 0.0209063   | 0.646127103670753     | 0.0847356131376682 |
| cg05277991 | 3  | 69788295  | MITF                                            | -0.00432936 | -0.242128685234001    | 0.0847356131376682 |
| cg09962379 | 8  | 37928432  |                                                 | -0.0263059  | -0.0428306920647438   | 0.0847356131376682 |
| cg02339888 | 1  | 67862336  | IL12RB2                                         | -0.0579882  | -0.137666014787818    | 0.0847356131376682 |
| cg08340583 | 4  | 178302630 |                                                 | -0.0326929  | -0.0515710411527625   | 0.0847356131376682 |
| cg06658816 | 1  | 9242956   |                                                 | 0.0146881   | 0.591824712047512     | 0.0847356131376682 |
| cg07279281 | 3  | 46735319  | ALS2CL                                          | 0.00851242  | 0.520694683325202     | 0.0847356131376682 |
| cg18987683 | 3  | 160283058 | KPNA4                                           | 0.0130201   | 1.04715822353622      | 0.0847356131376682 |
| cg00750934 | 14 | 74263737  | LOC100506476                                    | 0.00939825  | 0.0141692116458203    | 0.0847356131376682 |
| cg05587736 | 16 | 56780751  | NUP93                                           | -0.0214897  | -0.0328875960781537   | 0.0847356131376682 |
| cg02815785 | 14 | 37063429  |                                                 | -0.0161102  | -0.0246229964552876   | 0.0847356131376682 |
| cg19271031 | 3  | 187722915 |                                                 | 0.00878585  | 0.0129725452877342    | 0.0847356131376682 |
| cg02978503 | 7  | 48144090  | UPP1;UPP1;UPP1;UPP1;UPP1;UPP1                   | -0.0134704  | -0.0206483514749948   | 0.0847356131376682 |
| cg26365938 | 1  | 24645953  | GRHL3;GRHL3                                     | 0.00874729  | 0.338287482589174     | 0.0847356131376682 |
| cg24351167 | 6  | 12749567  | PHACTR1                                         | 0.0222847   | 0.681171391954102     | 0.0847356131376682 |
| cg16031872 | 3  | 142297641 | ATR;ATR                                         | 0.00679491  | 0.437141123323782     | 0.0847356131376682 |
| cg24109980 | 10 | 50818707  | SLC18A3;SLC18A3;CHAT                            | 0.0402809   | 0.781615798803201     | 0.0847356131376682 |
| cg08420415 | 22 | 38477802  | SLC16A8                                         | 0.0258848   | 0.47703187354563      | 0.0847356131376682 |
| cg01505700 | 17 | 4853232   | ENO3;ENO3;PFN1                                  | 0.00880318  | 0.569372087237164     | 0.0847356131376682 |
| cg12426293 | 18 | 8612540   | RAB12                                           | 0.0120186   | 0.0181199471451331    | 0.0847356131376682 |
| cg21707136 | 11 | 2421773   | TSSC4;TSSC4;TSSC4;TSSC4;TSSC4;TSSC4;TSSC4;TSSC4 | 0.0325146   | 1.16359844791259      | 0.0847356131376682 |
| cg19188060 | 3  | 184017239 | PSMD2                                           | 0.0218841   | 0.522587035980064     | 0.0847356131376682 |
| cg08595804 | 13 | 112712424 |                                                 | 0.0224692   | 0.58670196927976      | 0.0847356131376682 |
| cg25112966 | 3  | 72792066  |                                                 | -0.067358   | -0.118991794863527    | 0.0847356131376682 |
| cg18735356 | 1  | 112298505 | DDX20;DDX20;LOC101928718;FAM212B                | 0.0154145   | 0.5701027167503377    | 0.0847356131376682 |
| cg16246698 | 12 | 133263907 | PXMP2;POLE;POLE                                 | 0.0197624   | 0.672184523610034     | 0.0847356131376682 |
| cg20037470 | 17 | 30185765  | C1orf79                                         | 0.0133569   | 0.249864629156349     | 0.0847356131376682 |
| cg08304120 | 11 | 65381096  | MAP3K11                                         | 0.0153468   | 0.819629966305313     | 0.0847356131376682 |
| cg27591595 | 17 | 57732823  | CLTC;CLTC                                       | -0.0740377  | -0.1591174361721      | 0.0847356131376682 |
| cg11656992 | 17 | 79818741  | P4HB                                            | 0.0232591   | 0.759685030434842     | 0.0847356131376682 |
| cg01031146 | 3  | 184081222 | POLR2H;POLR2H                                   | 0.00373198  | 0.369798064437289     | 0.0847356131376682 |
| cg02854791 | 7  | 157776477 | PTPRN2;PTPRN2;PTPRN2;PTPRN2;PTPRN2              | 0.0179471   | 0.030230230306956     | 0.0847356131376682 |
| cg21068576 | 19 | 57875295  | TRAPPC2P1;ZNF547                                | 0.0344636   | 0.356714114053026     | 0.0847356131376682 |
| cg23610453 | 10 | 79470966  |                                                 | 0.0348559   | 0.482699371468834     | 0.0847356131376682 |
| cg16149238 | 2  | 23608001  | KLHL29                                          | 0.014991    | 0.58226696639567      | 0.0847356131376682 |
| cg20307885 | 7  | 27130090  |                                                 | -0.0467287  | -0.33753103990088     | 0.0847356131376682 |
| cg18330340 | 2  | 24307512  | TP53I3;TP53I3;TP53I3;TP53I3;FAM228B;FAM228B     | 0.0123467   | 0.661945959899942     | 0.0847356131376682 |
| cg02083546 | 12 | 118477739 | WSB2                                            | -0.0251245  | -0.0394787667458502   | 0.0847356131376682 |
| cg01840281 | 5  | 75977657  | IQGAP2;IQGAP2;IQGAP2;IQGAP2                     | -0.0543155  | -0.103480835306149    | 0.0847356131376682 |
| cg04084600 | 2  | 235016302 |                                                 | -0.0887487  | -0.196803131752561    | 0.0847356131376682 |
| cg06196453 | 2  | 109335786 | RANBP2                                          | 0.0240839   | 0.709728411509363     | 0.0847356131376682 |
| cg20349687 | 2  | 88927127  | EIF2AK3                                         | 0.0084648   | 0.552399187339018     | 0.0847356131376682 |
| cg26946821 | 17 | 35292390  |                                                 | 0.00885395  | 0.5591401171567075    | 0.0847356131376682 |
| cg12998265 | 3  | 156392708 | TIPARP-AS1;TIPARP;TIPARP                        | 0.0286218   | 0.524239602069331     | 0.0847356131376682 |
| cg11204311 | 1  | 235293522 | TOMM20                                          | -0.0560364  | -0.126793387475278    | 0.0847356131376682 |
| cg02057463 | 21 | 42789922  |                                                 | -0.0634933  | -0.125723716317831    | 0.0847356131376682 |
| cg11631334 | 3  | 196730272 | MF12                                            | 0.0297694   | 0.496061107187885     | 0.0847356131376682 |
| cg22209616 | 15 | 68569728  | FEM1B                                           | 0.008903    | 0.441413212058786     | 0.0847356131376682 |
| cg12250496 | 4  | 62066787  |                                                 | 0.0176925   | 0.57203090940559      | 0.0847356131376682 |
| cg06638463 | 19 | 10530633  | PDE4A                                           | 0.0339881   | 0.694266043456175     | 0.0848574265845052 |
| cg01085347 | 1  | 119870666 |                                                 | 0.0233212   | 0.6139453748129       | 0.084901181557511  |
| cg13865656 | 10 | 92757657  |                                                 | -0.0555869  | -0.0932009820079002   | 0.084901181557511  |
| cg06779945 | 6  | 138188320 | TNFAIP3                                         | 0.00596483  | 0.528806216089364     | 0.084901181557511  |
| cg11028747 | 7  | 102104916 | LRWD1;ALKBH4                                    | 0.00497174  | 0.379015860040477     | 0.084901181557511  |
| cg14277044 | 17 | 1890733   | RTN4RL1                                         | -0.00352069 | -0.00511751657589812  | 0.084901181557511  |
| cg17871537 | 5  | 118788128 | HSD17B4                                         | 0.00736392  | 0.527172274975102     | 0.084901181557511  |
| cg15554087 | 1  | 8404216   | SLC45A1                                         | 0.0235455   | 0.037036545411719     | 0.084901181557511  |
| cg18975376 | 10 | 28967265  | BAMBI                                           | 0.0120516   | 0.328098127097969     | 0.084901181557511  |
| cg25047469 | 15 | 90198526  | KIF7                                            | 0.0428549   | 0.55929695804996      | 0.084901181557511  |
| cg04142690 | 10 | 7830753   | KIN;KIN;ATP5C1;ATP5C1                           | 0.00413924  | 0.33433270111904      | 0.084901181557511  |
| cg06567042 | 3  | 197535273 | LRCH3                                           | -0.0513621  | -0.0885044591046284   | 0.084901181557511  |
| cg24270182 | 8  | 9046418   |                                                 | -0.00522964 | -0.00769499629810237  | 0.0849255715218498 |
| cg10196372 | 16 | 4322417   | TFAP4                                           | 0.0174328   | 0.712046735233784     | 0.0849255715218498 |
| cg21877498 | 5  | 139944509 | APBB3;APBB3;SLC35A4;APBB3;APBB3                 | 0.00996217  | 0.577753288251197     | 0.0849255715218498 |
| cg13223329 | 11 | 133274220 | OPCML                                           | -0.0533656  | -0.0835676551978196   | 0.0849255715218498 |
| cg02938651 | 6  | 855390    |                                                 | -0.00353251 | -0.005027026429404765 | 0.0849255715218498 |
| cg17537252 | 3  | 56836203  | ARHGEF3;ARHGEF3                                 | 0.0136309   | 0.466916076683746     | 0.0849255715218498 |
| cg25108914 | 11 | 58826264  | LOC283194                                       | 0.0389105   | 0.287975999586716     | 0.0849255715218498 |
| cg27430726 | 7  | 30721990  | CRHR2;CRHR2;CRHR2;CRHR2;CRHR2;CRHR2;CRHR2       | 0.011311    | 0.521767649408167     | 0.0849255715218498 |
| cg22300980 | 11 | 57330100  | UBE2L6;UBE2L6                                   | -0.0349869  | -0.0545198225423526   | 0.0849255715218498 |
| cg02523938 | 16 | 34409092  |                                                 | -0.0488614  | -0.128653064282963    | 0.0849255715218498 |
| cg13307690 | 2  | 25620049  | DTNB;DTNB;DTNB;DTNB;DTNB;DTNB;DTNB              | -0.0340807  | -0.054730263299998    | 0.0849255715218498 |
| cg26005766 | 6  | 125475650 | TPD52L1;TPD52L1;TPD52L1;TPD52L1;TPD52L1         | 0.0121424   | 0.755261674622638     | 0.0849255715218498 |
| cg11386686 | 1  | 203274497 | BTG2                                            | 0.0297698   | 1.05512549903966      | 0.0849255715218498 |
| cg09886619 | 8  | 38253313  | LETM2;LETM2;LETM2;LETM2;LETM2                   | -0.061259   | -0.104923449000059    | 0.0849255715218498 |
| cg09789536 | 1  | 896226    | KLHL17                                          | 0.0541413   | 0.22717425119714      | 0.0849255715218498 |
| cg07964213 | 3  | 138014757 | ARMC8;TXNDC6                                    | -0.0224892  | -0.0343656914261421   | 0.0849255715218498 |
| cg25781121 | 3  | 48282641  | ZNF589;ZNF589                                   | 0.015561    | 1.06991561905821      | 0.0849255715218498 |
| cg20245503 | 12 | 58026705  | B4GALNT1;B4GALNT1                               | 0.00603154  | 0.449689229447217     | 0.0849255715218498 |
| cg12947510 | 9  | 119449380 | ASTN2;TRIM32;ASTN2;ASTN2;ASTN2;ASTN2;TRIM32     | 0.00763217  | 0.324485527368699     | 0.0849255715218498 |

|             |    |           |                                                                                                                                                |             |                      |                    |
|-------------|----|-----------|------------------------------------------------------------------------------------------------------------------------------------------------|-------------|----------------------|--------------------|
| cg25208919  | 5  | 124704131 |                                                                                                                                                | -0.0368841  | -0.0609105098650921  | 0.0849255715218498 |
| cg040463109 | 1  | 110722603 | SLC6A17                                                                                                                                        | -0.0575138  | -0.102437236494354   | 0.0849255715218498 |
| cg18208654  | 17 | 41174520  | VAT1                                                                                                                                           | 0.00789929  | 0.441885381445395    | 0.0849255715218498 |
| cg10441013  | 1  | 160039990 | KCNJ10                                                                                                                                         | 0.0145335   | 0.486621023601117    | 0.0849255715218498 |
| cg25876975  | 15 | 77363192  | TSPAN3;TSPAN3;TSPAN3                                                                                                                           | 0.0571776   | 0.213949976422538    | 0.0849255715218498 |
| cg19656070  | 17 | 3571978   | TMEM93;TAX1BP3;TMEM93                                                                                                                          | 0.0217728   | 0.676160169864188    | 0.0849255715218498 |
| cg01526745  | 17 | 32448038  | ASIC2                                                                                                                                          | -0.0627376  | -0.110739687924328   | 0.0849255715218498 |
| cg23048358  | 17 | 9940652   | GAS7;GAS7                                                                                                                                      | -0.00611654 | -0.00897088920547826 | 0.0849255715218498 |
| cg09630385  | 10 | 88506688  |                                                                                                                                                | -0.0379275  | -0.0625005200942491  | 0.0849255715218498 |
| cg16507755  | 21 | 36164414  | RUNX1;RUNX1                                                                                                                                    | -0.019841   | -0.0308505724982541  | 0.0849656803197816 |
| cg15644003  | 11 | 63438952  | ATL3;ATL3                                                                                                                                      | 0.0122008   | 0.51202650694677     | 0.0849656803197816 |
| cg13645565  | 16 | 66959579  | RRAD;RRAD                                                                                                                                      | 0.0450487   | 0.716126643870319    | 0.0849970960961894 |
| cg03067068  | 16 | 19279774  | C16orf88;IQCK                                                                                                                                  | 0.0159206   | 0.505992677198746    | 0.0849970960961894 |
| cg22480244  | 1  | 220445929 | RAB3GAP2                                                                                                                                       | 0.00720055  | 0.49004323421868     | 0.0849970960961894 |
| cg13932954  | 1  | 25255805  | RUNX3;RUNX3                                                                                                                                    | 0.0227532   | 0.775045108269114    | 0.0850317240491275 |
| cg13946335  | 3  | 20383419  | LOC101927829                                                                                                                                   | -0.0304023  | -0.0474578600020399  | 0.0850317240491275 |
| cg24407859  | 22 | 43411083  |                                                                                                                                                | 0.0267052   | 0.652280788147366    | 0.0850317240491275 |
| cg12761536  | 22 | 38245354  | EIF3L;EIF3L                                                                                                                                    | 0.00513018  | 0.446372415315109    | 0.0850569729187668 |
| cg10477989  | 11 | 66039601  | C11orf24                                                                                                                                       | 0.0476399   | 0.621254780927399    | 0.0850877653672594 |
| cg05787952  | 16 | 734667    | JMJD8                                                                                                                                          | 0.0367921   | 0.562178927770991    | 0.0850877653672594 |
| cg12320972  | 18 | 19192160  | SNRPD1;SNRPD1                                                                                                                                  | 0.0110868   | 0.47136859062651     | 0.085130804986105  |
| cg18436128  | 14 | 65439236  | RAB15                                                                                                                                          | 0.0104338   | 0.6030620810418      | 0.085130804986105  |
| cg023030195 | 10 | 73342047  | CDH23;CDH23;CDH23;CDH23                                                                                                                        | -0.0530588  | -0.117521154603781   | 0.085130804986105  |
| cg14510105  | 16 | 18812794  | ARL6IP1;ARL6IP1                                                                                                                                | 0.0105248   | 0.611411543760673    | 0.085130804986105  |
| cg13628367  | 7  | 48429659  | ABCA13                                                                                                                                         | -0.0561567  | -0.598594925518236   | 0.085130804986105  |
| cg19270118  | 1  | 154553118 |                                                                                                                                                | -0.0398914  | -0.0638498094506196  | 0.085130804986105  |
| cg13701855  | 19 | 52532420  | ZNF614                                                                                                                                         | -0.0414902  | -0.178433484793812   | 0.085130804986105  |
| cg19135690  | 11 | 86620552  |                                                                                                                                                | -0.0198457  | -0.0304665542542186  | 0.085130804986105  |
| cg27200833  | 15 | 74421909  | ISLR2;LOC283731;ISLR2;ISLR2;ISLR2                                                                                                              | 0.0188493   | 0.701394603634314    | 0.085130804986105  |
| cg23433430  | 4  | 41362520  | LIMCH1;LIMCH1;LIMCH1;LIMCH1                                                                                                                    | 0.00656069  | 0.563411287425692    | 0.085130804986105  |
| cg05391643  | 1  | 27214630  | GPN2                                                                                                                                           | -0.06376    | -0.119308349193221   | 0.085130804986105  |
| cg04347624  | 3  | 101498377 | FAM55C;FAM55C;FAM55C                                                                                                                           | 0.0380975   | 0.942307785515412    | 0.085130804986105  |
| cg21206054  | 10 | 51827272  | FAM21A;FAM21A;FAM21EP                                                                                                                          | -0.0433977  | -0.541449718827203   | 0.085130804986105  |
| cg27199414  | 22 | 40901737  | MKL1;MKL1;MKL1                                                                                                                                 | -0.0706681  | -0.186211329441971   | 0.085130804986105  |
| cg18685243  | 12 | 58015069  | SLC26A10                                                                                                                                       | 0.021916    | 0.954528100290109    | 0.085130804986105  |
| cg02059882  | 11 | 70049130  | FADD                                                                                                                                           | 0.0112942   | 0.540162536419463    | 0.085130804986105  |
| cg12668711  | 17 | 48624393  | SPATA20;SPATA20;SPATA20                                                                                                                        | 0.01293     | 0.749019792807006    | 0.085130804986105  |
| cg12025821  | 8  | 145133465 | EXOSC4                                                                                                                                         | 0.0218552   | 0.57225280323658     | 0.085130804986105  |
| cg18467502  | 16 | 57144407  | CPNE2                                                                                                                                          | -0.0479318  | -0.0872025370005481  | 0.085130804986105  |
| cg04496233  | 11 | 64863659  | C11orf2                                                                                                                                        | 0.0117914   | 0.43187085076404     | 0.085130804986105  |
| cg06671069  | 10 | 91174283  | IFIT5                                                                                                                                          | 0.0197773   | 0.630349250429534    | 0.0851709366001437 |
| cg18609779  | 4  | 37455499  | C4orf19                                                                                                                                        | 0.0375313   | 0.685666450236602    | 0.085190293948191  |
| cg19190632  | 10 | 97022649  | PDLIM1                                                                                                                                         | -0.0708312  | -0.146639488070325   | 0.085190293948191  |
| cg03865041  | 16 | 71842666  | AP1G1;AP1G1;AP1G1;AP1G1                                                                                                                        | 0.0605445   | 0.654869194792888    | 0.085190293948191  |
| cg03600868  | 2  | 54826020  | SPTBN1;SPTBN1                                                                                                                                  | -0.0717462  | -0.13781776203358    | 0.085190293948191  |
| cg09174009  | 1  | 27216796  | GPN2;GPN2                                                                                                                                      | 0.00437665  | 0.631283506725758    | 0.085190293948191  |
| cg14849727  | 4  | 56719908  | EXOC1;EXOC1;EXOC1;EXOC1;EXOC1                                                                                                                  | 0.0159345   | 0.800293500524267    | 0.0852126565551805 |
| cg00076353  | 20 | 442752    | TBC1D20                                                                                                                                        | 0.0182954   | 0.62266737711325     | 0.0852126565551805 |
| cg12996305  | 17 | 2295923   | MNT                                                                                                                                            | 0.0405428   | 0.658840157486968    | 0.0852126565551805 |
| cg14408412  | 7  | 111776496 | DOCK4                                                                                                                                          | 0.00649472  | 0.00958055085890182  | 0.0852126565551805 |
| cg13199784  | 9  | 136283271 | REXO4;REXO4;REXO4;REXO4;REXO4;REXO4;ADAMTS13                                                                                                   | 0.0195613   | 0.66130462879414     | 0.0852367956617704 |
| cg06058618  | 1  | 155057452 | EFNA3                                                                                                                                          | 0.0172349   | 0.47535742126852     | 0.0852718775188369 |
| cg05751059  | 17 | 79848657  | ALYREF;ANAPC11;ANAPC11;ANAPC11;ANAPC11;ANAPC11;ANAPC11;ANAPC11;ANAPC11;ANAPC11;ANAPC11;ANAPC11;ANAPC11;ANAPC11;ANAPC11;ANAPC11;ANAPC11;ANAPC11 | 0.0367175   | 1.60816369011996     | 0.0853069333427688 |
| cg06067302  | 22 | 40766481  | SGSM3                                                                                                                                          | 0.0100293   | 0.84675374122985     | 0.085323384220766  |
| cg02520077  | 1  | 156163116 | SLC25A44;SLC25A44;SLC25A44;SLC25A44;SLC25A44                                                                                                   | -0.0327732  | -0.0589756200327238  | 0.085323384220766  |
| cg22395811  | 4  | 164945455 | MARCH1                                                                                                                                         | -0.0491493  | -0.0920634056012912  | 0.0853534947117769 |
| cg09149379  | 9  | 131038181 | SWI5;GOLGA2                                                                                                                                    | 0.0479517   | 1.80421152156068     | 0.0853534947117769 |
| cg19377812  | 7  | 130353647 | TSGA13;TSGA13;COPG2;COPG2                                                                                                                      | 0.0498273   | 0.51444703287057     | 0.08536060172747   |
| cg18985971  | 1  | 45265788  | PLK3                                                                                                                                           | 0.0135785   | 0.457452794963261    | 0.08536060172747   |
| cg27343747  | 9  | 130548282 | CDK9;MIR2861                                                                                                                                   | 0.0419201   | 0.355764107411106    | 0.08536060172747   |
| cg07189338  | 6  | 41040461  | NFYA;NFYA;OARD1                                                                                                                                | 0.0331173   | 1.03920367265374     | 0.08536060172747   |
| cg16294310  | 22 | 50629110  | TRABD                                                                                                                                          | 0.0245054   | 0.664637333454024    | 0.08536060172747   |
| cg26174797  | 2  | 27363557  | C2orf53                                                                                                                                        | -0.072699   | -0.159247679920262   | 0.08536060172747   |
| cg12383580  | 17 | 48167096  | ITGA3;ITGA3                                                                                                                                    | -0.0220512  | -0.0350619471097303  | 0.08536060172747   |
| cg01636413  | 13 | 25321336  |                                                                                                                                                | 0.0176837   | 0.434503461494158    | 0.08536060172747   |
| cg27265499  | 16 | 85699474  | KIAA0182;KIAA0182                                                                                                                              | 0.00757639  | 0.0111880453021659   | 0.08536060172747   |
| cg04117076  | 5  | 88991074  |                                                                                                                                                | -0.102811   | -0.245734681389713   | 0.08536060172747   |
| cg08066986  | 17 | 17942403  | ATPAF2;ATPAF2;C17orf39                                                                                                                         | 0.0107885   | 0.464652199985333    | 0.0853859782826372 |
| cg14231674  | 9  | 35657560  | CCDC107                                                                                                                                        | 0.0337256   | 0.246490719677977    | 0.0853859782826372 |
| cg04450857  | 10 | 119296756 | EMX2OS                                                                                                                                         | 0.0170111   | 0.458566180077479    | 0.0853859782826372 |
| cg01265653  | 11 | 96190436  |                                                                                                                                                | -0.0931282  | -0.175258644964937   | 0.0853859782826372 |
| cg05430257  | 12 | 12218620  |                                                                                                                                                | -0.0449105  | -0.0995847245426283  | 0.0853859782826372 |
| cg25846336  | 15 | 60293554  |                                                                                                                                                | -0.054481   | -0.28656878617789    | 0.0853859782826372 |
| cg21415305  | 3  | 9851855   | TLL3                                                                                                                                           | 0.0374695   | 0.613069963139213    | 0.0853859782826372 |
| cg23318713  | 10 | 75670697  | PLAU;C10orf55;PLAU                                                                                                                             | 0.0138882   | 0.65829746128766     | 0.0853859782826372 |
| cg03497182  | 2  | 76998734  | LRRTM4;LRRTM4                                                                                                                                  | -0.0360549  | -0.0594458022508987  | 0.0853859782826372 |
| cg11962201  | 20 | 33680799  | TRPC4AP;TRPC4AP                                                                                                                                | 0.0199037   | 0.578462414050975    | 0.0853859782826372 |
| cg01043997  | 6  | 30689219  | TUBB                                                                                                                                           | 0.0400131   | 0.410492491654461    | 0.0853859782826372 |
| cg00299070  | 1  | 237946534 | RYR2                                                                                                                                           | -0.0337146  | -0.0521843925907607  | 0.0853920702246093 |
| cg18320648  | 2  | 152266336 | RIF1                                                                                                                                           | 0.0520092   | 0.38142561602339     | 0.0854298564611327 |
| cg17840051  | 19 | 12150028  |                                                                                                                                                | -0.107915   | -0.212232607623093   | 0.0854298564611327 |
| cg20037575  | 15 | 96886839  |                                                                                                                                                | 0.0373574   | 0.36961371610807     | 0.0854298564611327 |

|            |    |           |                                                   |            |                     |                    |
|------------|----|-----------|---------------------------------------------------|------------|---------------------|--------------------|
| cg10247061 | 13 | 53065411  | LOC220115                                         | -0.0716379 | -0.174060916310077  | 0.0854298564611327 |
| cg15967188 | 4  | 2470700   | RNF4                                              | 0.0226155  | 1.2420523299089     | 0.0854298564611327 |
| cg00223135 | 15 | 43799245  | TP53BP1                                           | -0.0304165 | -0.0525155543049668 | 0.0854298564611327 |
| cg04891921 | 3  | 134514173 | EPHB1                                             | 0.0201048  | 0.466244539751808   | 0.0854298564611327 |
| cg12042864 | 7  | 99066260  |                                                   | -0.0453119 | -0.0746857981595283 | 0.0854298564611327 |
| cg01998755 | 7  | 99698536  | MCM7;AP4M1;MCM7;MCM7                              | 0.0296746  | 0.951901681845784   | 0.0854298564611327 |
| cg10719673 | 19 | 40933298  | SERTAD1                                           | -0.0640193 | -0.111877677422505  | 0.08544585709005   |
| cg01218180 | 6  | 168079427 |                                                   | 0.0270118  | 0.620586081511525   | 0.08544585709005   |
| cg19788417 | 20 | 30027638  | DEFB123                                           | -0.093645  | -0.209844530037269  | 0.0854591640587902 |
| cg17015033 | 8  | 37620039  | PROSC                                             | 0.0108422  | 0.65398446801714    | 0.0854591640587902 |
| cg23192120 | 11 | 45921134  | MAPK8IP1                                          | 0.0321883  | 0.611812248216262   | 0.0854598537623731 |
| cg19864539 | 22 | 25747688  | LRP5L;LRP5L                                       | 0.00237323 | 0.00346620129428112 | 0.0855190481114364 |
| cg04576568 | 2  | 220377822 | ACCN4;ACCN4                                       | 0.0122578  | 0.463260710219146   | 0.0855192750488044 |
| cg18391694 | 1  | 43250900  |                                                   | 0.0275801  | 0.41333319358724    | 0.0855192750488044 |
| cg06915098 | 2  | 220384302 | ASIC4                                             | -0.0588583 | -0.111495528050491  | 0.0855192750488044 |
| cg07141215 | 16 | 4308070   | TFAP4                                             | -0.0457699 | -0.0741629142802773 | 0.0855192750488044 |
| cg09348431 | 8  | 144898112 | SCRIB;SCRIB                                       | 0.0302988  | 0.744519773421304   | 0.0855192750488044 |
| cg21543987 | 7  | 1272486   | UNCX                                              | 0.0343296  | 1.34338411397281    | 0.0855192750488044 |
| cg15157403 | 1  | 234880737 |                                                   | -0.0680902 | -0.173202116574668  | 0.0855192750488044 |
| cg09440905 | 17 | 20094629  | SPECC1;SPECC1;SPECC1;SPECC1;SPECC1;SPECC1         | -0.0581646 | -0.117435999331006  | 0.0855192750488044 |
| cg16506959 | 4  | 83404135  |                                                   | -0.0487162 | -0.0832627802324026 | 0.0855192750488044 |
| cg14158601 | 17 | 8055831   | PER1                                              | 0.016016   | 0.553042779958306   | 0.0855192750488044 |
| cg15555727 | 8  | 144692268 | PYCR1                                             | 0.00622087 | 0.518986246868206   | 0.0855192750488044 |
| cg09324514 | 16 | 58498710  | NDRG4;NDRG4;NDRG4                                 | 0.0319918  | 0.434305177532388   | 0.0855192750488044 |
| cg00479770 | 11 | 111289721 | LOC100132078                                      | -0.0342881 | -0.0540541456025405 | 0.0855192750488044 |
| cg23130076 | 12 | 70759920  | KCNMB4                                            | 0.00499475 | 0.434372277575667   | 0.0855192750488044 |
| cg16015488 | 9  | 35707914  | TLN1                                              | -0.032132  | -0.0501843887392895 | 0.0855192750488044 |
| cg22395573 | 17 | 79830134  | ARHGDI1                                           | 0.00676045 | 0.405206527804799   | 0.0855192750488044 |
| cg06551828 | 2  | 242141868 | ANO7                                              | 0.00718933 | 0.0109548898389657  | 0.0855192750488044 |
| cg25791620 | 17 | 1472984   |                                                   | -0.0125148 | -0.0194420071504617 | 0.0855192750488044 |
| cg20467418 | 4  | 3297777   |                                                   | -0.0153421 | -0.0231737934240408 | 0.0855192750488044 |
| cg21687827 | 9  | 130890548 | PTGES2;PTGES2-AS1;PTGES2;PTGES2;PTGES2;PTGES2     | 0.0745665  | 1.60600038492757    | 0.0855192750488044 |
| cg25952423 | 2  | 48542335  | FOXN2                                             | 0.0139118  | 0.409520984666328   | 0.0855192750488044 |
| cg26224725 | 7  | 74489898  | WSCR16                                            | 0.0118688  | 0.629008045240634   | 0.0855192750488044 |
| cg15504469 | 1  | 44457406  | CCDC24;CCDC24                                     | 0.0128146  | 0.4686692139732084  | 0.0855192750488044 |
| cg07179556 | 14 | 100663534 |                                                   | -0.0396505 | -0.0667912628106074 | 0.0855192750488044 |
| cg11928198 | 1  | 151137319 | SCNM1;LYSMD1;LYSMD1                               | -0.0492924 | -0.0908732499196398 | 0.0855192750488044 |
| cg20349598 | 7  | 1962389   | MAD1L1;MAD1L1;MAD1L1                              | -0.0307137 | -0.0533166561340115 | 0.0855192750488044 |
| cg17910679 | 17 | 79981754  | STRA13;LRRRC45                                    | 0.0226366  | 0.469292115663466   | 0.0855192750488044 |
| cg03146981 | 16 | 70719277  | MTSS1L                                            | 0.0302025  | 0.696700389610499   | 0.0855192750488044 |
| cg23242862 | 8  | 65491152  | LOC401463                                         | 0.0119118  | 0.501568038122363   | 0.0855192750488044 |
| cg00009834 | 1  | 1347671   |                                                   | -0.0316497 | -0.0524563488502964 | 0.0855192750488044 |
| cg17278864 | 17 | 12877321  | RICH2                                             | 0.0113967  | 0.31000285469814    | 0.0855192750488044 |
| cg04041707 | 5  | 43018491  | LOC648987;LOC648987;LOC648987;LOC648987;LOC648987 | 0.00568084 | 0.719512167286785   | 0.0855192750488044 |
| cg16845708 | 1  | 22379018  | CDC42;CDC42;CDC42                                 | 0.0182024  | 0.810428893829624   | 0.0855192750488044 |
| cg17543177 | 12 | 29525010  | ERGIC2                                            | -0.0319475 | -0.0596369299857999 | 0.0855192750488044 |
| cg07247810 | 1  | 220684758 |                                                   | -0.0182733 | -0.02885321412045   | 0.0855192750488044 |
| cg05224707 | 5  | 171881549 | SH3PXD2B                                          | 0.0291701  | 0.4454270435903     | 0.0855192750488044 |
| cg14226678 | 19 | 2841332   | ZNF555                                            | 0.00812312 | 0.476357307689929   | 0.0855192750488044 |
| cg01273393 | 1  | 159996368 |                                                   | -0.0389963 | -0.0618435680895882 | 0.0855192750488044 |
| cg27575052 | 16 | 29855904  | MVP;MVP                                           | 0.00769272 | 0.0114417220173007  | 0.0855192750488044 |
| cg15182583 | 1  | 114355080 | RSBN1;AP4B1-AS1;RSBN1;RSBN1                       | 0.0160256  | 1.0448225012379     | 0.0855192750488044 |
| cg11193322 | 2  | 129347608 |                                                   | 0.011122   | 0.0172727297438109  | 0.0855192750488044 |
| cg01140579 | 3  | 48541502  | SHISA5                                            | 0.0432258  | 0.488739296379796   | 0.0855192750488044 |
| cg12456794 | 3  | 148523344 |                                                   | -0.0392429 | -0.0646579196171596 | 0.0855192750488044 |
| cg25984973 | 20 | 62289569  | RTEL1;RTEL1                                       | 0.0380397  | 0.853611753756357   | 0.0855192750488044 |
| cg14616251 | 1  | 24648696  | GRHL3;GRHL3;GRHL3                                 | 0.0127311  | 0.457672304148803   | 0.0855192750488044 |
| cg03503802 | 22 | 46933237  | CELSR1                                            | 0.015688   | 0.674083441487746   | 0.0855192750488044 |
| cg07981845 | 10 | 104154074 | NFKB2;NFKB2;NFKB2                                 | 0.00535293 | 0.309422911704373   | 0.0855192750488044 |
| cg15404157 | 7  | 140933    |                                                   | -0.0483626 | -0.0873389984475167 | 0.0855192750488044 |
| cg15831663 | 4  | 131729521 |                                                   | -0.0599234 | -0.104806991322195  | 0.0855192750488044 |
| cg06596689 | 7  | 139875956 | LOC100134229;JHDM1D                               | 0.01475    | 0.605074300473111   | 0.0855192750488044 |
| cg05693527 | 3  | 71114114  | FOXP1;FOXP1;FOXP1;FOXP1;FOXP1;FOXP1;FOXP1         | 0.0546768  | 0.388607767116064   | 0.0855192750488044 |
| cg26079854 | 16 | 52607602  | CASC16                                            | -0.063529  | -0.122195669474684  | 0.0855192750488044 |
| cg04167819 | 14 | 73395839  | DCAF4;DCAF4;DCAF4;DCAF4;DCAF4                     | -0.0293787 | -0.0495002914473858 | 0.0855192750488044 |
| cg03670816 | 5  | 53606426  | 15,00 ARL                                         | 0.035588   | 0.28623013465392    | 0.0855192750488044 |
| cg08398554 | 9  | 71736409  | TJP2                                              | 0.0150926  | 0.914310607426757   | 0.0855192750488044 |
| cg13716074 | 7  | 65215894  | CCT6P1                                            | 0.0115624  | 0.319346063859078   | 0.0855192750488044 |
| cg12073865 | 6  | 90121279  | RRAGD                                             | 0.0257461  | 0.669659118125108   | 0.0855192750488044 |
| cg27598114 | 13 | 45914733  | TPT1;TPT1;TPT1-AS1;TPT1                           | 0.0178793  | 0.511770998055929   | 0.0855192750488044 |
| cg09749205 | 2  | 198311980 |                                                   | -0.0533128 | -0.090690717756403  | 0.0855192750488044 |
| cg00475427 | 9  | 140019538 |                                                   | -0.0469496 | -0.0909821335987334 | 0.0855192750488044 |
| cg07364676 | 22 | 29137974  | CHEK2;HSCB;CHEK2;CHEK2                            | 0.040764   | 0.794176880786662   | 0.0855192750488044 |
| cg26237050 | 14 | 58754200  | PSMA3-AS1;PSMA3-AS1                               | -0.0683433 | -0.17371520762627   | 0.0855192750488044 |
| cg14428767 | 6  | 149867359 | PPIL4                                             | 0.0206455  | 0.850781774514552   | 0.0855192750488044 |
| cg08363518 | 19 | 42905128  |                                                   | -0.0571848 | -0.106650766239935  | 0.0855192750488044 |
| cg18353563 | 3  | 127390935 | ABTB1;PODXL2;ABTB1;ABTB1                          | 0.0144945  | 0.484521650063692   | 0.0855192750488044 |
| cg23867624 | 6  | 1610197   | FOXC1                                             | 0.00572037 | 0.392293592233346   | 0.0855192750488044 |
| cg14239515 | 19 | 38885242  | SPRED3                                            | 0.0392934  | 0.881631436717681   | 0.0855192750488044 |
| cg20474201 | 10 | 88228042  | WAPAL                                             | -0.0837158 | -0.146731180144507  | 0.0855192750488044 |
| cg02879471 | 6  | 111135854 | CDK19                                             | 0.00942727 | 0.522299091239575   | 0.0855192750488044 |
| cg23035058 | 10 | 133982861 | JAKMIP3                                           | -0.0302265 | -0.0473891289343606 | 0.0855192750488044 |

|            |    |           |                                                               |             |                     |                    |
|------------|----|-----------|---------------------------------------------------------------|-------------|---------------------|--------------------|
| cg00647258 | 22 | 19435555  | C2orf39;C2orf39;C2orf39;C2orf39                               | 0.00409343  | 0.432619437413634   | 0.0855192750488044 |
| cg08809260 | 2  | 177054140 | HOXD1                                                         | 0.0632161   | 1.04037059804988    | 0.0855192750488044 |
| cg13056495 | 7  | 134143249 | AKR1B1                                                        | 0.00521954  | 0.399986100448287   | 0.0855192750488044 |
| cg05956749 | 9  | 34664179  | CCL27                                                         | 0.0109795   | 0.0164589184262911  | 0.0855192750488044 |
| cg14250846 | 14 | 97061527  |                                                               | -0.0148907  | -0.0230782273137014 | 0.0855192750488044 |
| cg22711111 | 6  | 30139979  | TRIM15                                                        | 0.00912265  | 0.33185124965481    | 0.0855192750488044 |
| cg04112019 | 11 | 2165136   | IGF2AS;INS-IGF2;IGF2;IGF2AS                                   | 0.0051616   | 0.310460760901732   | 0.0855192750488044 |
| cg14041283 | 9  | 17906338  |                                                               | 0.0288142   | 0.705037109540893   | 0.0855192750488044 |
| cg19641554 | 16 | 20912025  | LYRM1;LYRM1;DCUN1D3;LYRM1;LYRM1;LYRM1;LYRM1;LYRM1;LYRM1;LYRM1 | 0.00331889  | 0.47722056613384    | 0.0855192750488044 |
| cg21328954 | 10 | 14880024  | HSPA14;HSPA14;HSPA14;CDNF                                     | 0.0314166   | 1.07537601242545    | 0.0855192750488044 |
| cg11381843 | 3  | 142681401 | PAQR9                                                         | -0.00871661 | -0.0129551859292501 | 0.0855192750488044 |
| cg16658737 | 19 | 37064572  | ZNF529;ZNF529;ZNF529                                          | 0.0335886   | 0.478510735700769   | 0.0855192750488044 |
| cg09949152 | 12 | 118573731 | PEBP1                                                         | 0.0185475   | 0.913599239852041   | 0.0855192750488044 |
| cg05137358 | 13 | 37006127  | CCNA1;CCNA1;CCNA1;CCNA1;CCNA1;CCNA1                           | 0.00828286  | 0.446476773243308   | 0.0855192750488044 |
| cg25476221 | 12 | 111807046 | FAM109A                                                       | 0.0111021   | 0.382689122576026   | 0.0855192750488044 |
| cg17663101 | 3  | 49131524  | QRICH1;QRICH1                                                 | 0.0359396   | 0.940158636946368   | 0.0855192750488044 |
| cg13462004 | 19 | 7005350   | FLJ25758                                                      | -0.036566   | -0.0629791167814796 | 0.0855192750488044 |
| cg13129662 | 17 | 48227708  | PPP1R9B                                                       | 0.0390236   | 0.939818379583971   | 0.0855192750488044 |
| cg13904199 | 9  | 86594091  | HNRNPK;HNRNPK;HNRNPK                                          | 0.0074633   | 0.383295010469337   | 0.0855192750488044 |
| cg00993799 | 7  | 104653126 | LOC100216545                                                  | 0.032493    | 1.50545321653985    | 0.0855192750488044 |
| cg14779973 | 10 | 115949613 | TDRD1                                                         | -0.0103657  | -0.0155545142485185 | 0.0855192750488044 |
| cg01918627 | 1  | 167326211 | POU2F1;POU2F1;POU2F1;POU2F1                                   | -0.0511902  | -0.0826432425071193 | 0.0855192750488044 |
| cg19517509 | 12 | 120933726 | DYNLL1;DYNLL1;DYNLL1                                          | 0.0146109   | 0.403138688286198   | 0.0855192750488044 |
| cg14153722 | 1  | 206858799 | MAPKAPK2;MAPKAPK2                                             | 0.0137662   | 0.830746944918956   | 0.0855192750488044 |
| cg06723057 | 16 | 28549923  | NUPR1;NUPR1                                                   | -0.0448136  | -0.0983614615100035 | 0.0855192750488044 |
| cg20324516 | 2  | 3137154   |                                                               | -0.0708698  | -0.130592265988802  | 0.0855192750488044 |
| cg02203224 | 12 | 123464087 | ARL6IP4;ARL6IP4;OGFOD2;ARL6IP4;ARL6IP4                        | -0.0233822  | -0.0833061879877847 | 0.0855192750488044 |
| cg01441738 | 1  | 180352217 | ACBD6                                                         | -0.0527949  | -0.106179874110821  | 0.0855192750488044 |
| cg23303585 | 6  | 32940054  | BRD2;BRD2                                                     | 0.00597823  | 0.489981470860512   | 0.0855192750488044 |
| cg24644049 | 4  | 85504048  | CDS1                                                          | 0.0385264   | 0.739823120870868   | 0.0855192750488044 |
| cg13455444 | 9  | 131833703 | FAM73B                                                        | -0.0297547  | -0.0477937014439323 | 0.0855192750488044 |
| cg01143309 | 17 | 72889783  | FADS6                                                         | 0.0371254   | 0.164102688496488   | 0.0855192750488044 |
| cg22712329 | 1  | 244624555 | C1orf101;C1orf101                                             | 0.0262803   | 0.596197941524036   | 0.0855192750488044 |
| cg21224049 | 4  | 668623    | ATP5I                                                         | 0.0142149   | 0.457729983608058   | 0.0855192750488044 |
| cg02958169 | 17 | 7184873   | SLC2A4                                                        | 0.0281753   | 0.667153707724179   | 0.0855192750488044 |
| cg02344238 | 11 | 65153777  | FRMD8                                                         | 0.00767457  | 0.365354681346234   | 0.0855192750488044 |
| cg06143886 | 13 | 101142914 | PCCA;PCCA;PCCA                                                | -0.0722491  | -0.13178894850367   | 0.0855192750488044 |
| cg04456437 | 3  | 119217424 | C3orf1;C3orf1                                                 | 0.00645879  | 0.424299695987105   | 0.0855192750488044 |
| cg15437053 | 19 | 34311123  |                                                               | 0.0176261   | 0.655222807152696   | 0.0855192750488044 |
| cg05687930 | 1  | 225840508 | ENAH;ENAH;ENAH;ENAH                                           | 0.00830021  | 0.3735285006041534  | 0.0855192750488044 |
| cg06942064 | 1  | 208417143 | PLXNA2;PLXNA2                                                 | 0.0264788   | 0.632316185199399   | 0.0855192750488044 |
| cg02570171 | 17 | 39822195  |                                                               | 0.0142025   | 0.74967896446903    | 0.0855192750488044 |
| cg10734849 | 2  | 217215658 | MARCH4                                                        | -0.0450749  | -0.075775282329955  | 0.0855192750488044 |
| cg01630422 | 19 | 45510733  | RELB                                                          | -0.0248097  | -0.039360962981449  | 0.0855192750488044 |
| cg13569527 | 20 | 33680323  | TRPC4AP;TRPC4AP                                               | 0.022812    | 0.575208885674837   | 0.0855327197115916 |
| cg00018896 | 13 | 25671476  | PABPC3                                                        | -0.0451995  | -0.0737506496267862 | 0.0855327197115916 |
| cg09357331 | 7  | 100214622 |                                                               | -0.0511941  | -0.135558845166512  | 0.0855368273312735 |
| cg14497781 | 8  | 124169251 |                                                               | 0.030301    | 0.75544997974366    | 0.0856375391074567 |
| cg09913544 | 22 | 39269086  | CBX6                                                          | 0.0111      | 0.684117201152256   | 0.0856375391074567 |
| cg08811958 | 20 | 43349788  | WISP2                                                         | -0.0435381  | -0.068577507658229  | 0.0856375391074567 |
| cg02601685 | 17 | 55055297  | SCPEP1                                                        | 0.0075303   | 0.416314662556925   | 0.0856375391074567 |
| cg08944481 | 1  | 15912201  | AGMAT                                                         | -0.0499029  | -0.102800933234037  | 0.0856450705441419 |
| cg06752163 | 3  | 170588210 | RPL22L1                                                       | 0.00509817  | 0.39675263916422    | 0.0856450705441419 |
| cg23948080 | 14 | 77227645  | VASH1                                                         | 0.0210837   | 0.613552285599204   | 0.0856450705441419 |
| cg02276747 | 7  | 43909057  | URGCP-MRPS24;MRPS24                                           | 0.0326749   | 0.984848775971333   | 0.0856527675325678 |
| cg08866144 | 6  | 31371784  | MICA                                                          | 0.0410855   | 0.271053014335895   | 0.0856760188358825 |
| cg12965753 | 16 | 691705    | FAM195A                                                       | 0.0070235   | 0.362099831694961   | 0.0856760188358825 |
| cg13676204 | 14 | 61447818  | SLC38A6;TRMT5                                                 | 0.00328659  | 0.327376981480651   | 0.0856760188358825 |
| cg20877627 | 17 | 79368872  |                                                               | 0.00423887  | 0.36158697309156    | 0.0856926240155534 |
| cg10435486 | 8  | 77591419  | LOC100192378                                                  | -0.0549171  | -0.152394604324409  | 0.0857449281392891 |
| cg10821925 | 12 | 29533733  | ERGIC2                                                        | 0.0346839   | 0.770148916957928   | 0.0857449281392891 |
| cg03311339 | 17 | 64299562  | PRKCA                                                         | 0.039891    | 0.512294569542289   | 0.0857449281392891 |
| cg23389783 | 7  | 138720575 | ZC3HAV1L                                                      | 0.00665     | 0.3528370309385     | 0.0857449281392891 |
| cg07734253 | 16 | 30194717  | CORO1A                                                        | 0.034964    | 1.33683384473226    | 0.0857449281392891 |
| cg12267222 | 1  | 203296843 |                                                               | 0.0145529   | 0.61833907597285    | 0.0857449281392891 |
| cg01153132 | 6  | 119400114 | FAM184A;FAM184A                                               | 0.0091538   | 0.470368014161469   | 0.0857449281392891 |
| cg06100147 | 7  | 143059260 | FAM131B;FAM131B                                               | 0.0445315   | 0.567931600910926   | 0.0857449281392891 |
| cg26308874 | 10 | 7478473   |                                                               | 0.0088971   | 0.013265549855482   | 0.0857449281392891 |
| cg26000619 | 19 | 2251067   | AMH                                                           | 0.0540911   | 0.290570626116059   | 0.0857449281392891 |
| cg02541778 | 8  | 55382901  |                                                               | 0.0578708   | 0.424923194362796   | 0.0857449281392891 |
| cg01757124 | 17 | 76320916  |                                                               | 0.00716586  | 0.622532537683103   | 0.0857449281392891 |
| cg23819836 | 6  | 15663134  | DTNBP1;DTNBP1;DTNBP1;DTNBP1;DTNBP1;DTNBP1                     | 0.0440301   | 0.39177790928595    | 0.0857449281392891 |
| cg01547051 | 7  | 150777654 | FASTK;FASTK                                                   | 0.0414595   | 1.26250011351382    | 0.0857449281392891 |
| cg10457397 | 4  | 110624915 | CASP6;CASP6                                                   | 0.0208296   | 0.498002120209624   | 0.0857449281392891 |
| cg12065524 | 17 | 29718231  | RAB11FIP4                                                     | 0.0268062   | 0.382839788665665   | 0.0857449281392891 |
| cg25180579 | 6  | 3982635   |                                                               | -0.053241   | -0.0909006083822817 | 0.0857449281392891 |
| cg21152662 | 4  | 48231543  | TEC                                                           | -0.0603193  | -0.107115314936557  | 0.0857449281392891 |
| cg23706268 | 13 | 51484060  | RNASEH2B;RNASEH2B;RNASEH2B;RNASEH2B                           | 0.0150147   | 0.98518438560639    | 0.0857449281392891 |
| cg16296880 | 4  | 39367793  | RFC1                                                          | 0.0204342   | 0.726443693530587   | 0.0857449281392891 |
| cg22314900 | 2  | 109150331 |                                                               | 0.0109679   | 0.436402078383206   | 0.0857449281392891 |
| cg20346165 | 20 | 39318984  | MAFB                                                          | 0.0252154   | 0.613108746566854   | 0.0857449281392891 |
| cg22265303 | 5  | 77596033  |                                                               | -0.0287076  | -0.0476112341917675 | 0.0857449281392891 |



|            |    |           |                                                                     |             |                      |                    |
|------------|----|-----------|---------------------------------------------------------------------|-------------|----------------------|--------------------|
| cg04922015 | 16 | 86500429  |                                                                     | 0.00423456  | 0.00629741425534387  | 0.0857449281392891 |
| cg12695615 | 20 | 61428209  | C2orf20                                                             | -0.00493352 | -0.349871475935404   | 0.0857449281392891 |
| cg03159456 | 12 | 125399716 | MIR5188;UBC                                                         | 0.0170374   | 0.548787804785667    | 0.0857449281392891 |
| cg10139614 | 16 | 88878480  | APRT;APRT                                                           | 0.0216632   | 1.128035866585       | 0.0857449281392891 |
| cg07022554 | 16 | 1993481   | SEPX1                                                               | 0.0471292   | 0.684921598281437    | 0.0857449281392891 |
| cg04659689 | 7  | 2903377   |                                                                     | 0.00454105  | 0.347633712345431    | 0.0857449281392891 |
| cg19929403 | 3  | 50220205  | SEMA3F                                                              | 0.0118719   | 0.0179274860254007   | 0.0857449281392891 |
| cg25126090 | 7  | 4722778   | FO XK1                                                              | 0.00605453  | 0.384567891366501    | 0.0857449281392891 |
| cg24524245 | 8  | 8537351   |                                                                     | -0.0728673  | -0.15446068088326    | 0.0857449281392891 |
| cg20317272 | 18 | 60383672  | PHLPP1                                                              | 0.0123261   | 0.514284827634439    | 0.0857449281392891 |
| cg18656667 | 12 | 14924100  | HIST4H4                                                             | 0.00469558  | 0.33438565631611     | 0.0857449281392891 |
| cg10860647 | 11 | 9385980   |                                                                     | 0.0190223   | 0.576682594719942    | 0.0857449281392891 |
| cg21379800 | 3  | 130745449 | NEK11;ASTE1;ASTE1;NEK11;NEK11                                       | 0.00468776  | 0.311301092789636    | 0.0857449281392891 |
| cg25053907 | 4  | 492859    | ZNF721;PIGG;PIGG;ZNF721                                             | 0.0147701   | 0.428017745001202    | 0.0857449281392891 |
| cg03149593 | 3  | 136988095 |                                                                     | -0.0485415  | -0.0871362144474621  | 0.0857449281392891 |
| cg27416518 | 3  | 190610654 |                                                                     | -0.00625549 | -0.00931211722897631 | 0.0857449281392891 |
| cg24830331 | 1  | 28807088  | PHACTR4;PHACTR4                                                     | -0.00587404 | -0.00876874710982874 | 0.0857449281392891 |
| cg19605250 | 20 | 1206806   | RAD21L1;RAD21L1                                                     | 0.0135084   | 0.483388242518669    | 0.0857449281392891 |
| cg12936509 | 7  | 129984292 | CPA5;CPA5;CPA5                                                      | -0.0599439  | -0.110554899933644   | 0.0857449281392891 |
| cg21921473 | 15 | 23087656  | NIPA1;NIPA1                                                         | -0.0401195  | -0.0670816043527821  | 0.0857449281392891 |
| cg21028326 | 22 | 50683188  | TUBGCP6;TUBGCP6                                                     | 0.0368312   | 1.28653108380936     | 0.0857449281392891 |
| cg05080836 | 20 | 62339176  | ARFRP1;ARFRP1;ARFRP1;ARFRP1;ARFRP1;ZGPAT;ZGPAT;ZGPAT;ZGPAT;ARFRP1;A | 0.0324763   | 0.635313665839809    | 0.0857449281392891 |
| cg08858239 | 8  | 134569763 | ST3GAL1;ST3GAL1                                                     | 0.00473642  | 0.00698882186109983  | 0.0857449281392891 |
| cg04892409 | 1  | 170501224 | GORAB;GORAB;GORAB                                                   | 0.0326848   | 0.526288111853717    | 0.0857449281392891 |
| cg10189607 | 4  | 184719753 |                                                                     | 0.0124347   | 0.406828525738214    | 0.0857449281392891 |
| cg03609308 | 1  | 3664084   | KIAA0495                                                            | 0.00457046  | 0.44529653646194     | 0.0857449281392891 |
| cg23415212 | 17 | 37331429  | CACNB1                                                              | 0.027796    | 0.39559246065974     | 0.0857449281392891 |
| cg18427336 | 2  | 69533779  |                                                                     | 0.00613279  | 0.576333994737979    | 0.0857449281392891 |
| cg03262242 | 1  | 28559476  | DNAJC8                                                              | 0.032941    | 0.330677944674467    | 0.0857449281392891 |
| cg23046897 | 19 | 55851104  | SUV420H2                                                            | 0.0214282   | 0.522364896444514    | 0.0857449281392891 |
| cg11099006 | 17 | 79860645  | NPB                                                                 | 0.0153111   | 0.380167051969718    | 0.0857449281392891 |
| cg03396354 | 19 | 46519603  | CCDC61                                                              | 0.0114941   | 0.593623932974506    | 0.0857449281392891 |
| cg00148252 | 4  | 89906159  | FAM13A                                                              | -0.0432932  | -0.0824364641011914  | 0.0857449281392891 |
| cg27087150 | 7  | 150756527 | SLC4A2;CDK5;CDK5                                                    | 0.0130187   | 0.460035773917969    | 0.0857449281392891 |
| cg20361600 | 2  | 172967608 | DLX2                                                                | 0.0104148   | 0.483105214652626    | 0.0857449281392891 |
| cg02250071 | 6  | 150465049 | PPP1R14C                                                            | 0.012141    | 0.537217376285555    | 0.0857449281392891 |
| cg15877295 | 7  | 138915876 | UBN2                                                                | 0.00886001  | 0.366895101495606    | 0.0857449281392891 |
| cg11756346 | 20 | 47835881  | DDX27;DDX27                                                         | 0.00708829  | 0.483255958877586    | 0.0857449281392891 |
| cg23662032 | 12 | 107712545 | BTBD11;BTBD11                                                       | 0.0166192   | 0.592937909176675    | 0.0857449281392891 |
| cg22637307 | 2  | 68590998  | PLEK                                                                | -0.0889567  | -0.162079694305693   | 0.0857449281392891 |
| cg13912060 | 14 | 68141881  | VTI1B                                                               | 0.0165504   | 0.549745333754205    | 0.0857449281392891 |
| cg13133000 | 1  | 78463620  |                                                                     | -0.0615943  | -0.117862765095812   | 0.0857449281392891 |
| cg14237287 | 19 | 40768217  | AKT2;AKT2;AKT2                                                      | -0.0182507  | -0.0277304627526744  | 0.0857449281392891 |
| cg06853376 | 5  | 125937059 | PHAX                                                                | 0.0210585   | 0.518558974223643    | 0.0857449281392891 |
| cg02717770 | 15 | 63136985  |                                                                     | 0.00823074  | 0.0122520626374781   | 0.0857449281392891 |
| cg14491479 | 8  | 144623711 | ZC3H3                                                               | 0.0284362   | 0.613241364680025    | 0.0857449281392891 |
| cg26809482 | 1  | 16940026  | NBPF1                                                               | 0.0177758   | 0.602780472300266    | 0.0857449281392891 |
| cg10673833 | 7  | 45018849  | MYO1G                                                               | 0.00807491  | 0.481568406783541    | 0.0857449281392891 |
| cg16943083 | 18 | 500817    | COLEC12                                                             | 0.028616    | 0.427711076791276    | 0.0857449281392891 |
| cg04680247 | 2  | 26007561  | ASXL2                                                               | -0.0200132  | -0.0304837726923483  | 0.0857449281392891 |
| cg15627380 | 17 | 80656703  | RAB40B                                                              | 0.0319022   | 1.11320215517378     | 0.0857449281392891 |
| cg07675285 | 16 | 27121267  |                                                                     | 0.0468718   | 0.375429098715402    | 0.0857449281392891 |
| cg16113681 | 22 | 19748925  | TBX1;TBX1;TBX1                                                      | 0.0195806   | 0.469319358258045    | 0.0857449281392891 |
| cg02695969 | 19 | 932813    | ARID3A                                                              | 0.0154691   | 0.477031731065707    | 0.0857449281392891 |
| cg12125605 | 3  | 181514754 |                                                                     | -0.0475646  | -0.079309934520363   | 0.0857449281392891 |
| cg02979871 | 9  | 112402944 | PALM2                                                               | 0.0151053   | 0.52834945567995     | 0.0857449281392891 |
| cg06976096 | 3  | 87138510  |                                                                     | 0.0420874   | 0.724677340010122    | 0.0857449281392891 |
| cg01082498 | 11 | 68608225  | CPT1A;CPT1A                                                         | 0.0107945   | 0.425029561576467    | 0.0857449281392891 |
| cg07032309 | 8  | 103668104 | KLF10                                                               | 0.0266888   | 0.882368127176271    | 0.0857449281392891 |
| cg08297053 | 16 | 30905110  | BCL7C;MIR762                                                        | 0.0152681   | 0.599351030574106    | 0.0857449281392891 |
| cg26080096 | 4  | 152340180 | FAM160A1                                                            | -0.0388459  | -0.0644702721237496  | 0.0857449281392891 |
| cg23620315 | 3  | 13572380  |                                                                     | -0.0551734  | -0.0879115378090351  | 0.0857449281392891 |
| cg17569397 | 2  | 200775850 | C2orf69                                                             | 0.0217682   | 0.754555147117887    | 0.0857449281392891 |
| cg15369512 | 17 | 1012967   | ABR;ABR;ABR                                                         | 0.0101118   | 0.370558845270498    | 0.0857449281392891 |
| cg20260663 | 12 | 56211576  | ORMDL2;SARNP;SARNP;SARNP                                            | 0.0224614   | 0.818366814882746    | 0.0857449281392891 |
| cg09248284 | 2  | 27851818  | CCDC121;CCDC121;GPN1;CCDC121;GPN1;GPN1;GPN1;CCDC121;GPN1            | 0.0294242   | 0.491961929813473    | 0.0857449281392891 |
| cg07388806 | 6  | 7108895   | RREB1;RREB1;RREB1;RREB1                                             | 0.0050525   | 0.43967623965243     | 0.0857449281392891 |
| cg16389027 | 5  | 137056645 | KLHL3;KLHL3;KLHL3                                                   | -0.04373    | -0.0721366942587397  | 0.0857449281392891 |
| cg09077975 | 15 | 87533146  | AGBL1                                                               | -0.012582   | -0.0190693852431337  | 0.0857449281392891 |
| cg01355526 | 2  | 232918190 | DIS3L2                                                              | -0.0300448  | -0.048101192073584   | 0.0857449281392891 |
| cg16985048 | 11 | 75716813  | UVRAG                                                               | -0.0327912  | -0.0533438342838287  | 0.0857449281392891 |
| cg18122310 | 12 | 50236657  | BCDIN3D                                                             | 0.0110567   | 0.532341953277288    | 0.0857449281392891 |
| cg00472898 | 16 | 28847676  | ATXN2L;ATXN2L;ATXN2L;ATXN2L;ATXN2L;ATXN2L;ATXN2L                    | -0.0251222  | -0.0398586921340959  | 0.0857449281392891 |
| cg11712217 | 17 | 80455631  |                                                                     | 0.0262475   | 0.63314976785879     | 0.0857449281392891 |
| cg13883202 | 3  | 47422330  | PTPN23                                                              | 0.0211468   | 0.631079499175718    | 0.0857449281392891 |
| cg26369308 | 19 | 41172324  | NUMBL                                                               | -0.067019   | -0.129599243938311   | 0.0857524769714478 |
| cg13131061 | 2  | 225268095 | FAM124B;FAM124B                                                     | -0.0383135  | -0.0656492023834379  | 0.0857524769714478 |
| cg10970409 | 3  | 42543566  | VIPR1                                                               | 0.0487319   | 0.737984759189468    | 0.0857524769714478 |
| cg16983788 | 3  | 179043854 | ZNF639;ZNF639;ZNF639                                                | -0.072998   | -0.163096163248515   | 0.0857524769714478 |
| cg13067052 | 16 | 2518286   |                                                                     | 0.00661919  | 0.513720880783488    | 0.0857524769714478 |
| cg10982433 | 10 | 16563821  | C1QL3;C1QL3                                                         | 0.0250415   | 0.560286541475081    | 0.0857524769714478 |
| cg14561071 | 8  | 30769215  |                                                                     | 0.0185291   | 0.376604093262937    | 0.0857524769714478 |

|            |    |           |                                             |            |                     |                    |
|------------|----|-----------|---------------------------------------------|------------|---------------------|--------------------|
| cg00564759 | 16 | 29818771  | MAZ;MAZ                                     | 0.0608427  | 0.732013815544876   | 0.0858103807138488 |
| cg02807964 | 11 | 10814144  |                                             | 0.0276401  | 0.562267925253505   | 0.0858103807138488 |
| cg07849112 | 20 | 36577384  |                                             | -0.0269032 | -0.0449126948938924 | 0.0858103807138488 |
| cg23283076 | 1  | 27114325  | PIGV                                        | 0.00816182 | 0.350208790873891   | 0.0858103807138488 |
| cg11054120 | 12 | 68828311  | LOC100507195                                | -0.0575834 | -0.0922776071186648 | 0.0858103807138488 |
| cg04410587 | 7  | 156743073 | NOM1                                        | 0.0240603  | 0.595535603857988   | 0.0858103807138488 |
| cg13412213 | 10 | 119598364 |                                             | -0.0581758 | -0.13355996792799   | 0.0858103807138488 |
| cg21397993 | 1  | 243418055 | CEP170;SDCCAG8;CEP170;CEP170                | 0.0383526  | 0.683658484252521   | 0.0858103807138488 |
| cg23203809 | 14 | 81686857  | GTF2A1;GTF2A1                               | -0.0224253 | -0.40423710964392   | 0.0858103807138488 |
| cg24568646 | 21 | 30446238  | CCT8                                        | 0.00527515 | 0.364852809332281   | 0.0858620832602374 |
| cg01458961 | 4  | 102269425 | PPP3CA;PPP3CA;PPP3CA                        | 0.0569296  | 0.942332385461137   | 0.0858620832602374 |
| cg00474734 | 12 | 53645975  | MFSD5;MFSD5;MFSD5                           | 0.0368862  | 0.405644425744312   | 0.0859336176360627 |
| cg10559432 | 20 | 50179543  | NFATC2                                      | 0.0135275  | 0.282486692000249   | 0.0859336902715438 |
| cg03232937 | 18 | 10599276  |                                             | -0.0411061 | -0.0675413732971352 | 0.0859602563424653 |
| cg15778335 | 22 | 43011005  | POLDIP3;POLDIP3;RNU12                       | 0.042372   | 0.370519687475654   | 0.0859602563424653 |
| cg26849331 | 6  | 32116216  | PRRT1                                       | 0.0307444  | 0.289228278107273   | 0.085983907179039  |
| cg07526883 | 14 | 39572542  | SEC23A                                      | 0.0146001  | 0.690914598449073   | 0.0861036694173011 |
| cg02933679 | 1  | 13910224  | PDPN;PDPN                                   | 0.0585758  | 0.396086000096395   | 0.0861203027284899 |
| cg05863534 | 17 | 34948351  | DHRS11;DHRS11                               | 0.0281105  | 0.960605323292582   | 0.0861203027284899 |
| cg02565863 | 14 | 56584899  | PEL12                                       | 0.0397121  | 0.43416892757874    | 0.0861203027284899 |
| cg10209391 | 1  | 26633129  | UBXN11;UBXN11;UBXN11;UBXN11;UBXN11          | 0.00650842 | 0.48262377379844    | 0.0861203027284899 |
| cg12365193 | 8  | 144692039 | PYCR1                                       | 0.0216607  | 0.608866709109554   | 0.0861203027284899 |
| cg19367256 | 1  | 18651998  | IGSF21                                      | -0.0220105 | -0.0352060123547406 | 0.0861270842413176 |
| cg18214701 | 17 | 48172593  | PK2;PK2;PK2;PK2                             | 0.0166268  | 0.678603460436062   | 0.0861270842413176 |
| cg00041084 | 5  | 64398983  |                                             | 0.0071752  | 0.421459129755645   | 0.0861270842413176 |
| cg02398663 | 18 | 45663510  |                                             | 0.0106867  | 0.604834478161489   | 0.0861270842413176 |
| cg24899519 | 11 | 59525228  | STX3;STX3                                   | 0.00752355 | 0.848058039568072   | 0.0861270842413176 |
| cg17632233 | 11 | 62439667  | C11orf48;C11orf83                           | 0.026333   | 0.927217706769418   | 0.0861270842413176 |
| cg03548744 | 12 | 110718499 | ATP2A2;ATP2A2                               | 0.014768   | 0.372609478614637   | 0.0861270842413176 |
| cg14781686 | 10 | 70287434  | SLC25A16                                    | 0.0680211  | 1.08225763343677    | 0.0861270842413176 |
| cg02009895 | 12 | 54380101  | HOXC10                                      | 0.0168279  | 0.44629926817631    | 0.0861583160345699 |
| cg04247218 | 16 | 27561328  | GTF3C1;KIAA0556                             | 0.00487895 | 0.33080417027282    | 0.0861583160345699 |
| cg16214654 | 2  | 61697828  | USP34;USP34                                 | 0.0420314  | 1.41103249020049    | 0.0861583160345699 |
| cg24182603 | 12 | 111843578 | SH2B3                                       | 0.00676442 | 0.322431796073833   | 0.0861583160345699 |
| cg14661383 | 1  | 228463720 | OBSCN;OBSCN                                 | 0.00812346 | 0.391427419588199   | 0.0861583160345699 |
| cg26649834 | 1  | 38156051  | C1orf109;C1orf109                           | 0.00397872 | 0.32857066834859    | 0.0861583160345699 |
| cg20559561 | 12 | 120972173 | RNF10;RNF10                                 | 0.00928704 | 0.618901196361024   | 0.0861583160345699 |
| cg15131414 | 19 | 37157847  | ZNF461                                      | 0.0259965  | 0.763039115170924   | 0.0861871565094117 |
| cg14179433 | 15 | 65809620  | DPP8;DPP8;DPP8;DPP8                         | 0.0115606  | 0.529859880882523   | 0.0861871565094117 |
| cg16528891 | 1  | 36169528  |                                             | -0.0846549 | -0.186226090566163  | 0.0861871565094117 |
| cg02944953 | 19 | 38544658  | SIPA1L3                                     | -0.0411612 | -0.0658379159326256 | 0.0861871565094117 |
| cg16579225 | 1  | 2322553   | RER1;MORN1                                  | 0.00781719 | 0.53148855615036    | 0.0861871565094117 |
| cg01915516 | 1  | 3568243   | TP73                                        | 0.0218979  | 0.839656753729767   | 0.0861871565094117 |
| cg18770186 | 8  | 141521259 | CHRAC1;CHRAC1                               | 0.0246205  | 0.842539240125454   | 0.0861871565094117 |
| cg20089744 | 3  | 128372087 |                                             | -0.022761  | -0.0347019702710593 | 0.0861871565094117 |
| cg24376776 | 10 | 101297245 |                                             | 0.0260028  | 0.713034054026896   | 0.0861871565094117 |
| cg01706029 | 16 | 27325672  | IL4R;IL4R                                   | 0.009453   | 0.400981983405204   | 0.0861871565094117 |
| cg06802812 | 5  | 40679165  | PTGER4                                      | 0.00767352 | 0.346661430161714   | 0.0863044940363843 |
| cg10536369 | 2  | 170335894 | BBS5                                        | 0.0260319  | 1.06243981267092    | 0.0863071052626647 |
| cg02037503 | 14 | 23540729  | ACIN1;ACIN1;ACIN1;ACIN1;ACIN1               | 0.0692757  | 0.547588610528149   | 0.0863071052626647 |
| cg16747999 | 8  | 95653174  | ESRP1;ESRP1;ESRP1;ESRP1;ESRP1               | 0.0165616  | 0.693367172017122   | 0.0863071052626647 |
| cg16166399 | 19 | 59030753  | ZBTB45;ZBTB45                               | 0.00675068 | 0.420537796260622   | 0.0863188198756657 |
| cg23704874 | 12 | 11701293  |                                             | -0.0397281 | -0.0638039593795401 | 0.0864304769582493 |
| cg19097648 | 5  | 115177461 | ATG12;AP3S1;ATG12                           | 0.0483512  | 1.27718107615971    | 0.0864471477515176 |
| cg21795699 | 17 | 15903687  | ZSWIM7;TTC19;ZSWIM7                         | 0.0181202  | 0.89582705017588    | 0.0864471477515176 |
| cg06932451 | 19 | 36869880  |                                             | 0.017996   | 0.597137366778245   | 0.086455261626138  |
| cg08943344 | 17 | 8374863   |                                             | 0.00989363 | 0.0147590605277746  | 0.0864882377859482 |
| cg01104200 | 12 | 562065    |                                             | -0.0334807 | -0.0539553673131296 | 0.0864882377859482 |
| cg05954989 | 10 | 135191962 | PAOX;PAOX;PAOX                              | 0.021335   | 0.965450758502688   | 0.0864882377859482 |
| cg07853246 | 4  | 143768134 | INPP4B;INPP4B                               | 0.0113501  | 0.6983981938424     | 0.0864882377859482 |
| cg19935040 | 17 | 42432165  | FAM171A2                                    | 0.0423084  | 0.256789387467278   | 0.0865551772613161 |
| cg25126812 | 14 | 69445989  | ACTN1;ACTN1;ACTN1;ACTN1;ACTN1               | 0.00953321 | 0.502723651751618   | 0.0865668030596986 |
| cg18542078 | 19 | 3184564   | NCLN                                        | -0.0393923 | -0.0708970351948469 | 0.0865668030596986 |
| cg06184899 | 14 | 77842967  | SAMD15;TMED8                                | 0.0181474  | 0.684085481434852   | 0.0865668030596986 |
| cg23033866 | 17 | 79670804  | MRPL12                                      | 0.0179798  | 0.53086517223639    | 0.0865984641183482 |
| cg05686118 | 16 | 57610170  | GPR114                                      | -0.0411124 | -0.0703520331997304 | 0.0865984641183482 |
| cg22165360 | 15 | 64388139  | SNX1;SNX1;SNX1                              | 0.00534042 | 0.333868972313664   | 0.0865984641183482 |
| cg00374173 | 19 | 47996733  | NAPA;NAPA;NAPA;NAPA;AS1;NAPA;NAPA;NAPA      | 0.0123243  | 0.0185665729954898  | 0.0865984641183482 |
| cg23741330 | 6  | 116832940 | FAM26E;BET3L                                | -0.0194929 | -0.0302241353620876 | 0.0865984641183482 |
| cg08742975 | 1  | 204632973 | LRRN2;LRRN2                                 | 0.0469095  | 0.0730005199689424  | 0.0865984641183482 |
| cg08060454 | 3  | 137487932 |                                             | 0.0271193  | 0.595624515175898   | 0.0865984641183482 |
| cg07377675 | 1  | 62901875  | USP1;USP1;USP1                              | 0.00881308 | 0.533814910135266   | 0.0865984641183482 |
| cg22684426 | 12 | 49351253  | ARF3                                        | 0.00455241 | 0.307945292585875   | 0.0865984641183482 |
| cg12052348 | 11 | 118272271 | ATP5L;ATP5L;LOC100131626;LOC100131626;ATP5L | 0.0049072  | 0.306432544122462   | 0.0865984641183482 |
| cg01163848 | 22 | 24060637  | LOC91316                                    | -0.0382882 | -0.0659619541377722 | 0.0865984641183482 |
| cg24389730 | 17 | 46114615  | MIR152;COPZ2                                | 0.0399214  | 0.34516935335577    | 0.0865984641183482 |
| cg27544871 | 12 | 11654175  |                                             | -0.0271028 | -0.0467210154052516 | 0.0865984641183482 |
| cg23358871 | 17 | 78121069  | EIF4A3                                      | 0.0114824  | 0.632174352748182   | 0.0865984641183482 |
| cg07810106 | 5  | 131630122 | SLC22A4                                     | 0.0173097  | 0.648616406181379   | 0.0865984641183482 |
| cg22149995 | 8  | 125461772 | TRMT12                                      | -0.112667  | -0.216500210555074  | 0.0865984641183482 |
| cg17906245 | 1  | 213021979 | C1orf227                                    | -0.0509095 | -0.0820680582030326 | 0.0865984641183482 |
| cg20495247 | 12 | 109536079 | UNG;UNG;UNG                                 | 0.0102328  | 0.471898661475282   | 0.0865984641183482 |



|            |    |           |                                                             |             |                     |                    |
|------------|----|-----------|-------------------------------------------------------------|-------------|---------------------|--------------------|
| cg21042539 | 5  | 176514085 | FGFR4;FGFR4                                                 | 0.0180938   | 0.605475784910254   | 0.0871313720871518 |
| cg12069276 | 11 | 10476242  | AMPD3;AMPD3;AMPD3                                           | -0.0202326  | -0.0314032486080442 | 0.0871313720871518 |
| cg02074591 | 16 | 3220802   |                                                             | 0.00554013  | 0.265553765523099   | 0.0871313720871518 |
| cg11314629 | 3  | 48583854  | PFKFB4                                                      | 0.0118163   | 0.0183121063596729  | 0.0871313720871518 |
| cg02150526 | 17 | 38136938  | PSMD3                                                       | 0.00689567  | 0.4081937866451229  | 0.0871313720871518 |
| cg23710795 | 20 | 57875655  | EDN3;EDN3;EDN3;EDN3;EDN3;EDN3;EDN3;EDN3;EDN3                | 0.0144888   | 0.330750157482516   | 0.0871545927395992 |
| cg01730032 | 4  | 135248255 |                                                             | -0.0338979  | -0.055381418220262  | 0.0871545927395992 |
| cg13190924 | 15 | 44084524  | SERF2;SERF2                                                 | 0.0138687   | 1.17448688683222    | 0.0871941972236036 |
| cg21767703 | 1  | 236444768 | ERO1LB                                                      | 0.0222572   | 0.460346622281909   | 0.0872145217218695 |
| cg25542041 | 9  | 124982087 | LHX6;LHX6                                                   | 0.0161711   | 0.561240447266441   | 0.0872460946563789 |
| cg16529563 | 19 | 49560284  | CCGB7                                                       | 0.00990721  | 0.368169961110081   | 0.0872766515169698 |
| cg17130815 | 7  | 2558891   | LFNG;LFNG;LFNG;LFNG                                         | 0.026786    | 1.14971904742815    | 0.0873116285634835 |
| cg06980251 | 18 | 60263900  |                                                             | 0.0314279   | 0.499437827634546   | 0.0873116285634835 |
| cg05256313 | 3  | 124926431 | SLC12A8;SLC12A8                                             | -0.0127349  | -0.0189094438846705 | 0.0873127323014528 |
| cg19434470 | 17 | 6917616   | RNASEK;RNASEK;RNASEK-C1orf49;C1orf49;C1orf49;C1orf49;RNASEK | 0.0254968   | 0.41757375303449    | 0.0873127323014528 |
| cg04680304 | 11 | 4116184   | RRM1;RRM1                                                   | 0.0124246   | 0.511439066436799   | 0.0873127323014528 |
| cg02072992 | 16 | 83960431  |                                                             | 0.0314955   | 0.621345576756324   | 0.0873410858589919 |
| cg05885483 | 12 | 49412537  | PRKAG1;PRKAG1;PRKAG1;PRKAG1;PRKAG1                          | 0.0208081   | 0.580239766154345   | 0.0873707738560687 |
| cg24126878 | 12 | 7342151   | PEX5;PEX5;PEX5;PEX5;PEX5                                    | -0.0127412  | -0.852032764041063  | 0.0873726159235019 |
| cg12306414 | 4  | 13549355  | LOC285548                                                   | 0.0527431   | 0.331773642684301   | 0.0873726159235019 |
| cg01003803 | 8  | 16859632  | FGF20;FGF20                                                 | 0.0232366   | 0.457602097105887   | 0.0873726159235019 |
| cg15765896 | 12 | 53472985  | SPRYD3                                                      | 0.0161035   | 0.698552831762123   | 0.0873726159235019 |
| cg24814784 | 6  | 31830947  | NEU1                                                        | 0.00912967  | 0.510805600721979   | 0.0873726159235019 |
| cg22376230 | 16 | 67880540  | NUTF2;CENPT                                                 | 0.0126683   | 0.444358558540035   | 0.0873726159235019 |
| cg05144147 | 10 | 6018955   | IL15RA;IL15RA                                               | 0.0267205   | 0.994607581793024   | 0.0873726159235019 |
| cg02832997 | 21 | 47878903  | DIP2A;DIP2A;DIP2A;DIP2A;DIP2A;DIP2A;DIP2A;DIP2A;DIP2A;DIP2A | 0.0386174   | 0.254393984435112   | 0.0873837676655894 |
| cg09691861 | 4  | 77870047  | SEPT11                                                      | 0.0354642   | 1.21147265596216    | 0.0874130849443185 |
| cg26681603 | 10 | 75700474  |                                                             | 0.0180876   | 0.534970399481228   | 0.0874130849443185 |
| cg12892033 | 14 | 104181379 | XRCC3;XRCC3;XRCC3;ZFVYE21;ZFVYE21                           | 0.0409411   | 0.980641009479062   | 0.0874876030099216 |
| cg26622537 | 11 | 101458233 |                                                             | -0.0416305  | -0.0696096111480089 | 0.0874898720472256 |
| cg08890976 | 12 | 100538115 | UHRF1BP1L;UHRF1BP1L                                         | -0.0546722  | -0.127954035330262  | 0.0875262364298879 |
| cg05402395 | 21 | 47427081  |                                                             | -0.0496481  | -0.0813216580169818 | 0.0875996012402595 |
| cg07784294 | 11 | 11873490  | USP47                                                       | -0.0703491  | -0.121351262497655  | 0.0876138973958095 |
| cg26679668 | 3  | 49218951  | C3orf84                                                     | -0.0634247  | -0.12065322948983   | 0.0876138973958095 |
| cg18286862 | 4  | 123300469 | ADAD1;ADAD1;ADAD1                                           | 0.0121103   | 0.0187214529864137  | 0.0876365453329989 |
| cg06090383 | 4  | 174292579 | SAP30                                                       | 0.032017    | 0.5211622710008     | 0.0876365453329989 |
| cg2204009  | 12 | 94071654  | CRAADD                                                      | 0.0294389   | 0.544662124769178   | 0.0876365453329989 |
| cg21076271 | 14 | 32546633  | ARHGAP5;ARHGAP5;ARHGAP5;C14orf128;ARHGAP5                   | 0.0232697   | 0.772981009373977   | 0.0876365453329989 |
| cg07274716 | 5  | 134363973 | PITX1                                                       | 0.0282718   | 0.535026309248913   | 0.0876365453329989 |
| cg17089785 | 15 | 99562412  |                                                             | -0.0331015  | -0.0512755011086281 | 0.0876365453329989 |
| cg04329455 | 9  | 137215364 |                                                             | -0.00811534 | -0.0121466149025329 | 0.0876755105579002 |
| cg26896160 | 1  | 6454004   | ACOT7                                                       | 0.0216602   | 0.883308727030421   | 0.0876911800183251 |
| cg11762839 | 11 | 17565885  | USH1C;USH1C;USH1C;USH1C                                     | 0.0130361   | 0.47904050103536    | 0.0876911800183251 |
| cg03568717 | 12 | 109458732 | SVOP;SVOP                                                   | 0.0131988   | 0.499115577478459   | 0.0876911800183251 |
| cg15433056 | 20 | 44993218  | SLC35C2;SLC35C2;SLC35C2                                     | 0.00827964  | 0.407281696555966   | 0.0876911800183251 |
| cg02875253 | 16 | 3314612   |                                                             | 0.0106593   | 0.423432551981614   | 0.0876911800183251 |
| cg02996314 | 1  | 32479425  | KHDRBS1                                                     | 0.0190915   | 0.704803920588197   | 0.0876911800183251 |
| cg13140338 | 1  | 91317255  |                                                             | 0.0308751   | 0.576745392591229   | 0.0876911800183251 |
| cg18829560 | 17 | 7298064   | PLSCR3                                                      | 0.00514093  | 0.254461514959414   | 0.0876911800183251 |
| cg17874528 | 15 | 86338361  | KLHL25                                                      | 0.0171094   | 0.749060316259336   | 0.0876911800183251 |
| cg22840361 | 15 | 96887919  |                                                             | 0.0219139   | 0.258591193097248   | 0.0876911800183251 |
| cg24168641 | 15 | 74219645  | LOXL1                                                       | 0.0315263   | 0.429200150408319   | 0.0876911800183251 |
| cg11116176 | 9  | 135805713 | TSC1;TSC1;TSC1                                              | -0.0911983  | -0.163915302549293  | 0.0876911800183251 |
| cg26522937 | 7  | 101440743 |                                                             | -0.0339733  | -0.0542135813035404 | 0.0876911800183251 |
| cg02743222 | 5  | 170736335 | TLX3;TLX3                                                   | 0.0176042   | 0.455762566241758   | 0.0876911800183251 |
| cg03630756 | 19 | 41839506  | TGFB1                                                       | -0.0401299  | -0.0667490396223754 | 0.0876911800183251 |
| cg12100721 | 17 | 79316639  |                                                             | 0.0292759   | 0.461557607469209   | 0.0876911800183251 |
| cg05827631 | 1  | 121261404 | LOC647121                                                   | 0.00831495  | 0.358060922308107   | 0.0876911800183251 |
| cg10451253 | 17 | 32907705  | TMEM132E;C17orf102                                          | 0.0101751   | 0.483137976168779   | 0.0876911800183251 |
| cg26442458 | 11 | 65728985  | SART1                                                       | 0.017306    | 0.984961025033792   | 0.0876911800183251 |
| cg17318645 | 14 | 77787612  | GSTZ1;POMT2;GSTZ1;GSTZ1                                     | 0.0163338   | 0.632184477345835   | 0.0876911800183251 |
| cg23237765 | 7  | 921845    | C7orf20                                                     | -0.0848101  | -0.142426389604335  | 0.0876968158562571 |
| cg21604741 | 2  | 27713092  | IFT172                                                      | -0.0507984  | -0.186090143895555  | 0.0876968158562571 |
| cg11369958 | 8  | 141451722 | TRAPPC9;TRAPPC9                                             | -0.08498    | -0.14290505044825   | 0.0876968158562571 |
| cg11352339 | 6  | 43482436  | YIPF3                                                       | -0.0603439  | -0.0979958671704588 | 0.0876968158562571 |
| cg26928080 | 14 | 95236825  | GSC                                                         | 0.0211178   | 0.267278072697447   | 0.0876968158562571 |
| cg05721281 | 3  | 197477555 | FYTTD1;FYTTD1;FYTTD1;KIAA0226                               | 0.0164666   | 0.519420977300906   | 0.0876968158562571 |
| cg15792158 | 12 | 113574084 | RASAL1                                                      | 0.0560287   | 0.7186664337282     | 0.0876968158562571 |
| cg19752627 | 7  | 98467380  | TMEM130;TMEM130;TMEM130                                     | 0.00992827  | 0.411417070143745   | 0.0876968158562571 |
| cg14959506 | 16 | 1525533   | CLCN7;CLCN7                                                 | 0.0162802   | 0.478967878467395   | 0.0876968158562571 |
| cg07759394 | 11 | 134201954 | GLB1L2;GLB1L2                                               | 0.00864049  | 0.490695987343039   | 0.0876968158562571 |
| cg02482035 | 1  | 41220017  | MIR30E;NFYC;NFYC;NFYC;NFYC;NFYC;NFYC                        | -0.0214787  | -0.0343398011146633 | 0.0876968158562571 |
| cg18273818 | 5  | 5422589   | KIAA0947                                                    | 0.0103743   | 0.615173594273549   | 0.0876968158562571 |
| cg18410117 | 6  | 90645081  | BACH2;BACH2                                                 | -0.00848131 | -0.012555957870713  | 0.0877046793049971 |
| cg02893015 | 8  | 82755558  | SNX16;SNX16;SNX16                                           | -0.0463173  | -0.104791694601495  | 0.0877216144658561 |
| cg26968714 | 15 | 20152530  |                                                             | -0.0292952  | -0.0521602715946582 | 0.0877294765252078 |
| cg05013825 | 14 | 76870341  | ESRRB                                                       | -0.0531688  | -0.103811233979351  | 0.0877960490122498 |
| cg09012337 | 11 | 73019505  | ARHGEF17                                                    | 0.0181161   | 0.424879897211853   | 0.0877960490122498 |
| cg06405860 | 1  | 60539458  | C1orf87                                                     | 0.031692    | 0.29209777648803    | 0.0877960490122498 |
| cg18956250 | 1  | 26798730  | HMGN2                                                       | 0.0108972   | 0.641472040933614   | 0.0877960490122498 |
| cg10122932 | 7  | 99698990  | MCM7;MCM7;MCM7;AP4M1                                        | 0.0277232   | 0.848007131211059   | 0.0877960490122498 |
| cg03800721 | 12 | 120525338 | CCDC64                                                      | 0.00793653  | 0.494132685616719   | 0.0877960490122498 |



|            |    |           |                                                 |             |                     |                    |
|------------|----|-----------|-------------------------------------------------|-------------|---------------------|--------------------|
| cg24371217 | 3  | 156402033 | TIPARP                                          | 0.0245537   | 0.0380324531602961  | 0.0884228563666723 |
| cg18101314 | 11 | 72504857  | STARD10                                         | 0.0287924   | 0.69282388364639    | 0.0884228563666723 |
| cg15405931 | 19 | 52693188  | PPP2R1A                                         | 0.00860243  | 0.58989218624091    | 0.0884228563666723 |
| cg19044279 | 18 | 658447    | TYMS;C1orf56                                    | 0.0147594   | 0.564168355038449   | 0.0884228563666723 |
| cg00987699 | 7  | 5229947   | WIPI2;WIPI2;WIPI2;WIPI2;WIPI2;WIPI2             | 0.0529673   | 0.6467555501489     | 0.0884228563666723 |
| cg01976469 | 18 | 56076257  |                                                 | -0.0503598  | -0.092441802851527  | 0.0884228563666723 |
| cg26748435 | 14 | 64854866  | MTHFD1;MTHFD1;MIR548AZ                          | 0.0220145   | 0.600261371942938   | 0.0884228563666723 |
| cg27475235 | 16 | 58659721  | CNOT1;CNOT1                                     | -0.0832578  | -0.154306331317932  | 0.0884228563666723 |
| cg15752230 | 14 | 35005787  | EAPP                                            | -0.071998   | -0.136064645301829  | 0.0884228563666723 |
| cg13588054 | 7  | 126892578 | GRM8                                            | 0.0101924   | 0.290129138254495   | 0.0884228563666723 |
| cg23924007 | 4  | 140099401 |                                                 | 0.00880979  | 0.524920607381924   | 0.0884402167465414 |
| cg21142038 | 1  | 202183444 | LGR6;LGR6;LGR6                                  | 0.0175064   | 0.388035933093821   | 0.0884631503591757 |
| cg10576257 | 2  | 75428132  | TACR1;TACR1                                     | 0.0298301   | 0.913569703882141   | 0.088558629913202  |
| cg13332525 | 6  | 99949744  | USP45                                           | -0.0614611  | -0.110478855996015  | 0.088588197552262  |
| cg03323770 | 14 | 74960890  | NPC2;ISCA2                                      | 0.00810729  | 0.488838282436922   | 0.0886268200056694 |
| cg07663404 | 19 | 3979938   | EEF2                                            | 0.0088309   | 0.0131774816106332  | 0.0886365890794188 |
| cg08857906 | 1  | 28156999  | PPP1R8;PPP1R8;PPP1R8                            | 0.0659985   | 0.260817647687251   | 0.0886365890794188 |
| cg04365101 | 17 | 55703965  | MSI2;MSI2                                       | -0.0108413  | -0.0167249447474204 | 0.0886365890794188 |
| cg20615128 | 7  | 140396907 | NDUFB2;NDUFB2-AS1                               | 0.00597842  | 0.539828959275201   | 0.0886370937928553 |
| cg10442913 | 1  | 116915309 | ATP1A1;ATP1A1                                   | 0.00854496  | 0.329239413401459   | 0.0886468227782772 |
| cg25164886 | 16 | 88700624  |                                                 | 0.0433969   | 0.587062919604477   | 0.0886468227782772 |
| cg11728900 | 10 | 13203459  | MCM10;MCM10                                     | 0.00940993  | 0.512002770089747   | 0.0886708643414291 |
| cg02084259 | 15 | 34178478  | AVEN                                            | -0.045107   | -0.0762311072363058 | 0.0887003598920323 |
| cg25847024 | 1  | 111991376 | WDR77;ATP5F1                                    | 0.0160966   | 0.446721827726696   | 0.0887003598920323 |
| cg18961370 | 9  | 124262142 | GGTA1P;GGTA1P                                   | 0.0153513   | 0.438532313217459   | 0.0887045024649253 |
| cg00996367 | 12 | 39301695  |                                                 | -0.0305468  | -0.0478977083450052 | 0.0887045024649253 |
| cg05840756 | 5  | 114696346 |                                                 | -0.0491011  | -0.0805896937447548 | 0.0887045024649253 |
| cg18922524 | 12 | 54447136  | HOXC4;HOXC4                                     | 0.00855981  | 0.382127900451824   | 0.0887045024649253 |
| cg00989217 | 21 | 33651492  | C21orf45                                        | 0.00953562  | 0.43157743804003    | 0.0887045024649253 |
| cg09957933 | 15 | 57065793  |                                                 | 0.00693919  | 0.0103199920419637  | 0.0887045024649253 |
| cg01610561 | 19 | 34895766  | PDCD2L                                          | 0.00924969  | 0.338652989969779   | 0.088773360431765  |
| cg07743799 | 20 | 2821434   | FAM113A;VPS16;VPS16                             | 0.00877241  | 0.693962708344277   | 0.088773360431765  |
| cg19112349 | 8  | 28244113  | ZNF395                                          | 0.0154051   | 0.967407024406541   | 0.088773360431765  |
| cg14084056 | 12 | 48744539  | ZNF641                                          | 0.00903712  | 0.452955832385787   | 0.088773360431765  |
| cg21032292 | 21 | 34395093  |                                                 | 0.00962698  | 0.45745734108325    | 0.088788427805005  |
| cg24036292 | 11 | 70416269  | SHANK2;SHANK2                                   | -0.0109096  | -0.016260338551304  | 0.0888086780552478 |
| cg07785518 | 2  | 140510062 |                                                 | -0.0648215  | -0.112432108380904  | 0.0888086780552478 |
| cg22414994 | 7  | 77619544  |                                                 | -0.0326882  | -0.0526074825567689 | 0.0888086780552478 |
| cg03551378 | 6  | 36309528  |                                                 | -0.0698275  | -0.126075626082961  | 0.0888086780552478 |
| cg11380323 | 1  | 220534666 |                                                 | -0.015055   | -0.0227417292595675 | 0.0888086780552478 |
| cg07164875 | 16 | 89788709  | C16orf7;ZNF276;ZNF276                           | 0.0258635   | 0.649086736222904   | 0.0888086780552478 |
| cg19800413 | 6  | 108077539 | SCML4;SCML4                                     | 0.0733687   | 0.115910620385264   | 0.0888086780552478 |
| cg01719220 | 16 | 58035188  | C16orf57;ZNF319                                 | 0.00958668  | 0.551270089573762   | 0.0888254393529388 |
| cg14667731 | 6  | 28891990  | TRIM27                                          | 0.00575718  | 0.36363219967237    | 0.0888989817382632 |
| cg21361127 | 7  | 27766351  |                                                 | -0.0419402  | -0.0678763854526501 | 0.0889302453829284 |
| cg12500976 | 2  | 233498078 | EFHD1;EFHD1                                     | 0.0234824   | 0.82236519057905    | 0.0889406020745895 |
| cg17669438 | 3  | 133615173 | RAB6B                                           | 0.0109713   | 0.387812901715694   | 0.0889406020745895 |
| cg26373942 | 12 | 108523463 | WSCD2                                           | 0.0306075   | 0.725335539952447   | 0.0889406020745895 |
| cg10772244 | 12 | 6643804   | GAPDH;GAPDH;GAPDH;GAPDH;GAPDH                   | 0.0251031   | 0.644938874428515   | 0.0889406020745895 |
| cg21439852 | 19 | 10628193  | S1PR5;S1PR5                                     | 0.0327639   | 0.388205411575406   | 0.0889406020745895 |
| cg12646754 | 1  | 2574751   |                                                 | 0.0606272   | 1.81821963352498    | 0.0889406020745895 |
| cg24096934 | 9  | 90589828  | CDK20;CDK20;CDK20;CDK20;CDK20                   | 0.0264909   | 0.5310752524488357  | 0.0889406020745895 |
| cg27603843 | 16 | 32926385  |                                                 | -0.0291786  | -0.0476874318731588 | 0.0889406020745895 |
| cg17418440 | 6  | 3069353   |                                                 | 0.00956465  | 0.53196112093224    | 0.0889406020745895 |
| cg24480260 | 17 | 80098801  | CCDC57                                          | -0.0495537  | -0.0840753129259729 | 0.0889531855601125 |
| cg00583480 | 8  | 134441362 |                                                 | 0.00332889  | 0.00488741132664654 | 0.0889572462506623 |
| cg23995249 | 3  | 132440400 | NPHP3-AS1;NPHP3;NPHP3-ACAD11                    | -0.0500266  | -0.137525897319688  | 0.0890449531799747 |
| cg01435564 | 5  | 132150904 | ANKRD43                                         | 0.00486217  | 0.00734057895712357 | 0.0890449531799747 |
| cg21667796 | 11 | 63804119  | MACROD1                                         | 0.0291891   | 0.995023463629163   | 0.0890504145849747 |
| cg14182682 | 14 | 57857589  | NAA30                                           | -0.00863309 | -0.525542590414428  | 0.0890504145849747 |
| cg18635246 | 17 | 55021287  | COIL                                            | -0.0403807  | -0.0649148293533908 | 0.0890580053948821 |
| cg00980047 | 12 | 121642721 |                                                 | -0.0780793  | -0.1970979142537    | 0.0890580053948821 |
| cg09252196 | 1  | 113933337 | MAGI3;MAGI3                                     | 0.0137642   | 0.607634146361661   | 0.0890580053948821 |
| cg18991677 | 1  | 16846966  |                                                 | -0.0401832  | -0.0852926395921857 | 0.0890580053948821 |
| cg16248933 | 3  | 122003561 | CASR                                            | 0.00395246  | 0.00580698206157762 | 0.0890580053948821 |
| cg11619775 | 17 | 61920126  | SMARCD2;SMARCD2                                 | 0.0274426   | 0.79836492136703    | 0.0890580053948821 |
| cg18665594 | 5  | 101119420 |                                                 | 0.0902522   | 0.263795381714835   | 0.0890580053948821 |
| cg13501117 | 1  | 3566577   | WDR8;WDR8                                       | 0.0128703   | 0.442832727139667   | 0.0890580053948821 |
| cg14857596 | 12 | 72233493  | TBC1D15;TBC1D15;TBC1D15;TBC1D15;TBC1D15;TBC1D15 | 0.0230154   | 1.00552372321533    | 0.0890580053948821 |
| cg05403508 | 1  | 47069957  | MKNK1;MKNK1;MKNK1;MKNK1;MKNK1;MKNK1;MKNK1       | 0.00932662  | 0.443835922155401   | 0.0890580053948821 |
| cg24410546 | 8  | 26371551  | PNMA2                                           | 0.0045053   | 0.291342622560949   | 0.0890580053948821 |
| cg14036868 | 2  | 38604442  | ATL2;ATL2;ATL2                                  | 0.0335152   | 0.60967717154075    | 0.0890580053948821 |
| cg24848467 | 6  | 28134517  | ZNF389                                          | -0.0722459  | -0.157029535260242  | 0.0890580053948821 |
| cg13862983 | 9  | 73028130  | KLF9                                            | 0.0109747   | 0.464207157547605   | 0.0890580053948821 |
| cg07292028 | 7  | 134044231 |                                                 | -0.0113265  | -0.016985649382528  | 0.0890580053948821 |
| cg02506578 | 3  | 25824554  | NGLY1;NGLY1;NGLY1;NGLY1                         | 0.00897952  | 0.509657461825112   | 0.0890580053948821 |
| cg01936481 | 22 | 25882506  |                                                 | -0.0489258  | -0.0837667598794427 | 0.0890580053948821 |
| cg18493085 | 17 | 73474562  | KIAA0195                                        | 0.00554829  | 0.00833775505517753 | 0.0890580053948821 |
| cg04963066 | 8  | 146126972 | ZNF250;ZNF250                                   | 0.0191352   | 0.793035892565235   | 0.0890580053948821 |
| cg00353773 | 10 | 44880708  | CXCL12;CXCL12;CXCL12                            | 0.0134585   | 0.261540560311256   | 0.0890580053948821 |
| cg10396491 | 8  | 123808147 | ZHX2                                            | -0.0485148  | -0.101824723828751  | 0.0890580053948821 |
| cg09853387 | 7  | 139877374 | LOC100134229;JHDM1D                             | 0.0304341   | 0.682970593052685   | 0.0890580053948821 |

|            |    |           |                                                             |             |                     |                    |
|------------|----|-----------|-------------------------------------------------------------|-------------|---------------------|--------------------|
| cg26832142 | 1  | 66258441  | PDE4B;PDE4B                                                 | 0.0113967   | 0.407001666107987   | 0.0890580053948821 |
| cg24568647 | 10 | 43903337  | HNRNPF;HNRNPF;HNRNPF;HNRNPF                                 | 0.00901386  | 0.506248708375301   | 0.0890580053948821 |
| cg25552017 | 1  | 945416    |                                                             | -0.0703949  | -0.170372948377519  | 0.0890580053948821 |
| cg17222231 | 14 | 105714673 | BTBD6;BRF1;BRF1;BRF1;BRF1;BRF1                              | 0.0155752   | 0.665840362815223   | 0.0890580053948821 |
| cg25088355 | 8  | 144691901 | PYCR1                                                       | 0.00372233  | 0.354437181334157   | 0.0890580053948821 |
| cg15391499 | 5  | 112630623 | MCC;MCC                                                     | 0.00696992  | 0.481254965816211   | 0.0890580053948821 |
| cg22775801 | 12 | 123636480 |                                                             | 0.0296534   | 0.0501535206136403  | 0.0890580053948821 |
| cg06809691 | 17 | 17380297  | MED9                                                        | 0.0154226   | 0.760210070440155   | 0.0890580053948821 |
| cg18716861 | 20 | 43538761  | PABPC1L;PABPC1L                                             | 0.0171476   | 0.76311069502501    | 0.0890580053948821 |
| cg24751717 | 17 | 4642944   | ZMYND15;CXCL16;CXCL16;CXCL16;CXCL16;ZMYND15                 | 0.0238835   | 0.751715299608699   | 0.0890580053948821 |
| cg03320144 | 17 | 14933536  | CDRT7                                                       | -0.0285427  | -0.0448370269569562 | 0.0890580053948821 |
| cg15975102 | 19 | 8008829   | TIMM44                                                      | 0.0176649   | 0.609555757230171   | 0.0890580053948821 |
| cg06674310 | 6  | 27357040  | ZNF391                                                      | 0.010605    | 0.250867258660337   | 0.0890580053948821 |
| cg07132926 | 13 | 21480411  |                                                             | -0.0848535  | -0.165495231962734  | 0.0890580053948821 |
| cg04490178 | 19 | 3179545   | S1PR4                                                       | 0.0282289   | 0.788584882078409   | 0.0890580053948821 |
| cg05137680 | 5  | 138729068 | LOC389333                                                   | 0.0126872   | 0.748507664448023   | 0.0890580053948821 |
| cg04314308 | 19 | 19336150  | NCAN                                                        | 0.00859169  | 0.493056442506098   | 0.0890580053948821 |
| cg13301155 | 15 | 82338574  | MEX3B                                                       | 0.0185433   | 0.737814115618871   | 0.0890580053948821 |
| cg13357518 | 1  | 22263347  | HSPG2                                                       | 0.032915    | 0.450296119252778   | 0.0890580053948821 |
| cg17161020 | 19 | 19302807  | RFXANK;RFXANK;RFXANK;RFXANK;MEF2B2B;MEF2B2B;MEF2B2B;MEF2B2B | 0.0357417   | 0.309390984470248   | 0.0890580053948821 |
| cg07737482 | 16 | 68631748  |                                                             | -0.0285964  | -0.0447483153914435 | 0.0890580053948821 |
| cg11595203 | 16 | 2098149   | TSC2;TSC2;TSC2;NTHL1                                        | 0.0136175   | 0.714413915690609   | 0.0890580053948821 |
| cg19176999 | 14 | 92414221  | FBLN5                                                       | 0.00890498  | 0.370799861441464   | 0.0890580053948821 |
| cg19712603 | 13 | 53422777  | PCDH8;PCDH8                                                 | 0.0206135   | 0.512575259279322   | 0.0890580053948821 |
| cg05097593 | 17 | 34890677  | MYO19;MYO19;MYO19;PIGW                                      | 0.0141653   | 0.473303164380058   | 0.0890580053948821 |
| cg07590922 | 11 | 76152669  |                                                             | -0.0778667  | -0.160174365831787  | 0.0890580053948821 |
| cg12668472 | 17 | 63327954  |                                                             | -0.0761632  | -0.14212680688266   | 0.0890580053948821 |
| cg07195197 | 16 | 1662150   | IFT140                                                      | 0.014144    | 0.705710585780396   | 0.0890580053948821 |
| cg07909497 | 12 | 9600950   | DDX12                                                       | 0.0171893   | 0.459367563245276   | 0.0890580053948821 |
| cg00974149 | 17 | 56296512  | MKS1;MKS1                                                   | 0.0331975   | 0.725645667544736   | 0.0890580053948821 |
| cg13672103 | 12 | 57985290  | PIP4K2C;PIP4K2C;PIP4K2C;PIP4K2C                             | 0.0415711   | 0.424697129664964   | 0.0890580053948821 |
| cg09964204 | 3  | 66024343  | MAG11;MAG11;MAG11;MAG11;MAG11;MAG11                         | 0.0223501   | 0.431142704199004   | 0.0890580053948821 |
| cg14864994 | 12 | 6496214   | LTBR                                                        | -0.034919   | -0.055076682186541  | 0.0890580053948821 |
| cg01603004 | 1  | 236462959 |                                                             | -0.0253645  | -0.0396638129214135 | 0.0890580053948821 |
| cg05838956 | 11 | 6704805   | MRPL17                                                      | 0.0142646   | 0.580152775399249   | 0.0890580053948821 |
| cg13636983 | 9  | 135838862 | GF1B                                                        | -0.0222539  | -0.0339747168557058 | 0.0890580053948821 |
| cg19853434 | 10 | 14286813  | FRMD4A                                                      | -0.0315731  | -0.0588757169116242 | 0.0890580053948821 |
| cg00973823 | 1  | 32226349  | BAI2                                                        | 0.0436339   | 0.432417633422928   | 0.0890693142187285 |
| cg08163767 | 2  | 241500709 | DDSP28;ANKMY1                                               | 0.00846791  | 0.690112955348012   | 0.0890693142187285 |
| cg21826292 | 9  | 80850930  | CEP78;CEP78                                                 | 0.0123248   | 0.615814766623267   | 0.0891450630253458 |
| cg04509133 | 1  | 167734853 | MPZL1;MPZL1;MPZL1                                           | -0.0258336  | -0.040253048589882  | 0.0891450630253458 |
| cg25142954 | 15 | 41245554  | CHAC1;CHAC1                                                 | 0.0241555   | 0.855252461820159   | 0.0891450630253458 |
| cg14224553 | 10 | 63875107  |                                                             | -0.0607726  | -0.126995253770261  | 0.0891450630253458 |
| cg04270788 | 1  | 89356964  | GTF2B                                                       | 0.00622963  | 0.457471148976015   | 0.0891450630253458 |
| cg07937578 | 4  | 25487481  |                                                             | -0.0646896  | -0.116574695180118  | 0.0891450630253458 |
| cg09309286 | 17 | 32960898  | TMEM132E                                                    | -0.069266   | -0.127245925906624  | 0.0891450630253458 |
| cg11505936 | 16 | 58005235  | CNGB1;CNGB1;CNGB1                                           | 0.0120789   | 0.0186254358468773  | 0.0891450630253458 |
| cg15717656 | 2  | 74709666  | TTC31;TTC31;CCDC142                                         | 0.0192388   | 1.25692211894078    | 0.0891450630253458 |
| cg18073966 | 1  | 178482209 | TEX35;TEX35;TEX35;TEX35                                     | 0.011501    | 0.018159337611149   | 0.0891450630253458 |
| cg08165971 | 2  | 233792394 | NGEF;NGEF                                                   | 0.022152    | 0.48656460953514    | 0.0891450630253458 |
| cg23131955 | 1  | 65457091  | LINC01359                                                   | -0.0275666  | -0.0460747486764094 | 0.0891450630253458 |
| cg01609705 | 8  | 38240669  | WHSC1L1;WHSC1L1                                             | 0.00553507  | 0.437297595018231   | 0.0891450630253458 |
| cg14340610 | 19 | 37568961  | ZNF420                                                      | 0.00995753  | 0.485096692216678   | 0.0891450630253458 |
| cg22845819 | 19 | 58514331  | ZNF606;ZNF606;LOC100128398                                  | 0.0425861   | 1.29250457156914    | 0.0891450630253458 |
| cg08740862 | 11 | 62314417  | AHNAK;AHNAK                                                 | 0.0367308   | 0.74971013776671    | 0.0891450630253458 |
| cg07951519 | 17 | 4607306   | PELP1                                                       | 0.0174443   | 0.347339590393983   | 0.0891450630253458 |
| cg24892765 | 4  | 56252140  | SRD5A3-AS1                                                  | -0.00981506 | -0.0145062517785612 | 0.0891450630253458 |
| cg10991578 | 14 | 96671020  | BDKRB2                                                      | 0.0134145   | 0.224925774458096   | 0.0891450630253458 |
| cg0288562  | 7  | 23571645  | TRA2A;TRA2A                                                 | 0.00764393  | 0.568286843263829   | 0.0891450630253458 |
| cg06908806 | 20 | 42136129  |                                                             | 0.0178472   | 0.526829314248015   | 0.0891450630253458 |
| cg05315621 | 14 | 99375443  |                                                             | -0.0185535  | -0.0281230622086155 | 0.0891450630253458 |
| cg22802813 | 12 | 95942761  | USP44;USP44                                                 | 0.0314353   | 0.44826737557051    | 0.0891450630253458 |
| cg22126266 | 1  | 180199560 | LHX4;LHX4                                                   | 0.00642825  | 0.49897798404026    | 0.0891450630253458 |
| cg13957451 | 1  | 111991591 | ATP5F1;WDR77                                                | 0.0104205   | 0.51967500671238    | 0.0891450630253458 |
| cg04508332 | 16 | 89916780  | SPIRE2                                                      | 0.00739312  | 0.0109045413080596  | 0.0891450630253458 |
| cg15749350 | 5  | 147257225 | SCGB3A2                                                     | -0.020808   | -0.0324361853954206 | 0.0891450630253458 |
| cg27227597 | 2  | 218661518 |                                                             | -0.0334775  | -0.0563838878803841 | 0.0891450630253458 |
| cg11857246 | 1  | 11741390  | MAD2L2;MAD2L2                                               | 0.0363992   | 1.35341266670335    | 0.0891450630253458 |
| cg17587023 | 1  | 206223592 | AVPR1B                                                      | 0.0106078   | 0.570273594102875   | 0.0891450630253458 |
| cg23289197 | 7  | 16685473  | BZW2;BZW2;ANKMY2;BZW2                                       | 0.0115621   | 0.5256039909763     | 0.0891450630253458 |
| cg10455757 | 9  | 35111424  | KIAA1539                                                    | 0.0195841   | 0.608365894025089   | 0.0891450630253458 |
| cg08209577 | 8  | 145635217 | CPSF1                                                       | 0.0111943   | 0.39758631936003    | 0.0891450630253458 |
| cg09786084 | 17 | 60670351  | TLK2;TLK2;TLK2                                              | -0.0639215  | -0.121222108586389  | 0.0891450630253458 |
| cg01582807 | 7  | 99070515  | ZNF789;ZNF789;ZNF789;ZNF789                                 | 0.0128593   | 0.536843172613344   | 0.0891450630253458 |
| cg02764239 | 2  | 74615548  | LOC100189589                                                | 0.00441999  | 0.0065576493224424  | 0.0891450630253458 |
| cg23240961 | 12 | 57634410  | NDUFA4L2                                                    | -0.00624213 | -0.330744435152292  | 0.0891450630253458 |
| cg22447380 | 5  | 55451073  | ANKRD55                                                     | 0.0446263   | 0.540600873196172   | 0.0891450630253458 |
| cg13283153 | 8  | 9756828   |                                                             | 0.00661476  | 0.198476422192831   | 0.0891450630253458 |
| cg01230508 | 14 | 65569312  | MAX;MAX;MAX;MAX;MAX;MAX                                     | 0.0072729   | 0.306164490401547   | 0.0891450630253458 |
| cg19281363 | 13 | 42031291  | C13orf15                                                    | 0.0114889   | 0.564390406409639   | 0.0891450630253458 |
| cg10450899 | 17 | 685900    | RNMTL1;GLOD4                                                | 0.0188629   | 0.872261106546768   | 0.0891450630253458 |
| cg01035689 | 10 | 118608698 |                                                             | 0.0238443   | 0.770680858257093   | 0.0891450630253458 |

|             |    |           |                                                             |             |                      |                    |
|-------------|----|-----------|-------------------------------------------------------------|-------------|----------------------|--------------------|
| cg09055355  | 8  | 130951979 | FAM49B;FAM49B                                               | 0.0234576   | 0.717194027577518    | 0.0891450630253458 |
| cg01679663  | 6  | 81027072  | BCKDHB;BCKDHB                                               | -0.0591739  | -0.111443682214744   | 0.0891450630253458 |
| cg24312390  | 7  | 149158098 | ZNF777                                                      | 0.00381455  | 0.369983046271768    | 0.0891450630253458 |
| cg12951098  | 5  | 157170574 | 11,00 LSM                                                   | 0.00311224  | 0.357623044879138    | 0.0891450630253458 |
| cg18690833  | 20 | 13972022  | SEL1L2                                                      | -0.0749749  | -0.14125784436807    | 0.0891450630253458 |
| cg06409997  | 2  | 220110347 | GLB1L;GLB1L;STK16;STK16                                     | 0.0169139   | 1.13327448540117     | 0.0891450630253458 |
| cg20747266  | 6  | 142409507 | NMBR                                                        | 0.0423351   | 0.262735331483575    | 0.0891450630253458 |
| cg05279076  | 8  | 103666388 | KLF10;KLF10;KLF10;KLF10                                     | 0.00555489  | 0.305705893719144    | 0.0891450630253458 |
| cg10099795  | 21 | 16681618  |                                                             | -0.038726   | -0.133699303285653   | 0.0891450630253458 |
| cg01039083  | 2  | 241857215 |                                                             | 0.00958469  | 0.0144054676402346   | 0.0891450630253458 |
| cg20275133  | 1  | 1342361   | MRPL20                                                      | 0.0137911   | 0.624307346557911    | 0.0891450630253458 |
| cg01779740  | 8  | 142366708 | GPR20                                                       | -0.0077299  | -0.0115213097564728  | 0.0891450630253458 |
| cg04179482  | 20 | 34360400  | PHF20                                                       | 0.0050403   | 0.41572363706409     | 0.0891450630253458 |
| cg07831032  | 1  | 46629507  |                                                             | -0.0649677  | -0.155546747282263   | 0.0891450630253458 |
| cg07702644  | 19 | 43936935  |                                                             | -0.0508455  | -0.0892774006246176  | 0.0891450630253458 |
| cg09209803  | 6  | 33588932  | ITPR3                                                       | 0.0152452   | 0.543450045840447    | 0.0891450630253458 |
| cg18696576  | 6  | 34203630  | HMGA1;HMGA1;HMGA1;HMGA1                                     | 0.0251394   | 0.307998476214534    | 0.0891450630253458 |
| cg04123995  | 17 | 71308339  | CDC42EP4                                                    | 0.0235      | 0.947052857694835    | 0.0892354232776816 |
| cg01540571  | 1  | 15911089  | AGMAT                                                       | 0.0227149   | 0.805879183222799    | 0.0892394796681224 |
| cg02884346  | 4  | 6271501   | WFS1;WFS1                                                   | 0.0315346   | 0.987549557150615    | 0.0892881772254871 |
| cg19039291  | 17 | 7229608   | NEURL4;NEURL4                                               | -0.0107414  | -0.0158829771309281  | 0.0893452120997153 |
| cg25135778  | 20 | 60736870  | SS18L1;SS18L1;SS18L1;SS18L1                                 | 0.00802356  | 0.0118744556397144   | 0.089383640806762  |
| cg24061931  | 15 | 75654619  | MAN2C1;MAN2C1;MAN2C1;MAN2C1                                 | -0.0235554  | -0.0363803361138928  | 0.0894124719428491 |
| cg10992925  | 3  | 50192260  | SEMA3F                                                      | 0.024019    | 0.45032402828694     | 0.0894332128871207 |
| cg04524552  | 19 | 4670575   | C19orf10                                                    | 0.0241565   | 0.612758894518592    | 0.0894332128871207 |
| cg08866760  | 8  | 123793830 | ZHX2                                                        | 0.00882801  | 0.449200257944127    | 0.0894332128871207 |
| cg10036402  | 14 | 77787255  | POMT2;GSTZ1;GSTZ1;GSTZ1;GSTZ1                               | 0.0345778   | 0.265325466534982    | 0.0894332128871207 |
| cg07495177  | 10 | 88740955  | AGAP11                                                      | -0.0584936  | -0.166011755842338   | 0.0894332128871207 |
| cg16508623  | 12 | 102271114 | DRAM1;DRAM1                                                 | 0.0102659   | 0.963921617193752    | 0.0894706937839015 |
| cg08184047  | 17 | 79849980  | ANAPC11;ANAPC11;ANAPC11;ANAPC11;ANAPC11;ANAPC11;ANAPC11;THO | 0.0264166   | 0.727305381612241    | 0.0895139620795204 |
| cg08114293  | 3  | 10028395  | TMEM111;TMEM111                                             | 0.0103273   | 0.365282388224807    | 0.0895139620795204 |
| cg09510269  | 6  | 30292743  | HCG18;HCG18                                                 | -0.0434588  | -0.0711123862581692  | 0.0895139620795204 |
| cg09514401  | 8  | 72988022  | TRPA1                                                       | 0.0133084   | 0.314737746246823    | 0.0895139620795204 |
| cg23749739  | 3  | 183979443 | ECE2;CAMK2N2                                                | 0.00979796  | 0.455280706977219    | 0.0895139620795204 |
| cg07924079  | 2  | 197504206 | CCDC150                                                     | 0.0132508   | 0.429347382087542    | 0.0895159799186584 |
| cg13416901  | 9  | 136019673 | RALGDS                                                      | 0.0180962   | 0.853767413144674    | 0.0895159799186584 |
| cg18573884  | 12 | 51639577  | SMAGP;SMAGP;DAZAP2                                          | 0.00571346  | 0.00840682410507371  | 0.0895374210148951 |
| cg23813012  | 1  | 14026482  | PRDM2                                                       | 0.00608188  | 0.422462301042458    | 0.0895452503693674 |
| cg14632335  | 2  | 70882265  |                                                             | -0.0203802  | -0.031698087326582   | 0.0895452503693674 |
| cg19071293  | 17 | 7765793   |                                                             | -0.0662549  | -0.11610280098628    | 0.0895452503693674 |
| cg11996632  | 16 | 70284893  | EXOSC6;EXOSC6                                               | 0.0125357   | 0.860253620006769    | 0.089554978030876  |
| cg14853922  | 1  | 179051253 | TOR3A;TOR3A                                                 | 0.0234908   | 0.988130147996323    | 0.089554978030876  |
| cg08496100  | 14 | 103655428 | LINC00605                                                   | 0.0223012   | 0.507761598128574    | 0.089587485225354  |
| cg19422250  | 15 | 41086034  | DNAJC17                                                     | -0.0666096  | -0.137938689353172   | 0.0896210217151902 |
| cg27629898  | 8  | 142070851 |                                                             | -0.0196572  | -0.0312438163555979  | 0.0896210217151902 |
| cg21012729  | 14 | 51297401  | NIN;NIN;NIN                                                 | 0.0378978   | 0.63093522547691     | 0.0896210217151902 |
| cg13944275  | 9  | 140024112 |                                                             | 0.00558581  | 0.406131831157119    | 0.0896210217151902 |
| cg19831545  | 1  | 198076518 |                                                             | -0.0248574  | -0.0381393893943132  | 0.0896575234009509 |
| cg14928667  | 9  | 4679457   | CDC37L1-AS1;CDC37L1-AS1;CDC37L1                             | 0.00280732  | 0.343026019310008    | 0.0896575234009509 |
| cg03781505  | 17 | 16310359  |                                                             | 0.0227022   | 0.673632877400796    | 0.0896575234009509 |
| cg19821527  | 1  | 220375253 | RAB3GAP2;SNORA36B                                           | -0.0890064  | -0.169627759273318   | 0.0896575234009509 |
| cg09214759  | 10 | 5328293   |                                                             | -0.105813   | -0.221135004207985   | 0.089702595356346  |
| cg00771688  | 2  | 120124593 | C2orf76;DBI;DBI;DBI;DBI                                     | 0.0117639   | 0.462552856977606    | 0.089702595356346  |
| cg18552663  | 20 | 388903    | RBCK1;RBCK1;RBCK1;RBCK1                                     | -0.00331404 | -0.337423753836614   | 0.089702595356346  |
| cg03477080  | 3  | 46448920  | CCRL2;CCRL2;CCRL2                                           | 0.0245039   | 0.60536131642699     | 0.089702595356346  |
| cg13189086  | 15 | 23034679  | NIPA2;NIPA2;NIPA2;NIPA2                                     | 0.015691    | 0.76488729001534     | 0.089702595356346  |
| cg03356490  | 19 | 35605867  | FXYP3;FXYP3;FXYP3;FXYP3;FXYP3;FXYP3;FXYP3;FXYP3             | 0.0464093   | 0.517418501573625    | 0.089702595356346  |
| cg15630908  | 7  | 72041048  | TYW1B                                                       | -0.0065032  | -0.00965042413312846 | 0.0897141419069085 |
| cg04876095  | 11 | 62296270  | AHNAK;AHNAK                                                 | -0.0484057  | -0.0783060631192003  | 0.0897913617174765 |
| cg01791302  | 10 | 12386716  |                                                             | -0.0273726  | -0.0428353380989886  | 0.0897913617174765 |
| cg18328612  | 19 | 4676623   | DPP9                                                        | 0.00517628  | 0.00761640581129525  | 0.0898550015146941 |
| cg22351824  | 22 | 24084185  | ZNF70                                                       | -0.0593128  | -0.162000256852345   | 0.0898550015146941 |
| cg10258271  | 2  | 31361593  | GALNT14                                                     | 0.0240434   | 0.50008034899802     | 0.0898550015146941 |
| cg06892384  | 5  | 84671738  |                                                             | -0.0351722  | -0.277148525091371   | 0.0898550015146941 |
| cg00208412  | 10 | 99609481  | GOLGA7B                                                     | 0.00745647  | 0.836775522597876    | 0.0898550015146941 |
| cg22316269  | 4  | 571371    |                                                             | 0.00865584  | 0.429121131278236    | 0.0898807013231869 |
| cg11475510  | 22 | 30752584  | SF3A1;SF3A1;CCDC157                                         | 0.0149317   | 0.557600644412581    | 0.0898981227194644 |
| cg04929759  | 12 | 133016214 |                                                             | 0.0443186   | 0.583351138439602    | 0.0899110251106411 |
| cg02811627  | 14 | 103395368 | AMN                                                         | 0.0171068   | 0.353051097319935    | 0.0899110251106411 |
| cg271715128 | 11 | 66824169  | RHOD                                                        | 0.00992061  | 0.557699839230153    | 0.0899193943829086 |
| cg15326320  | 2  | 172967665 | DLX2                                                        | 0.00774018  | 0.570249253982562    | 0.0899218011791305 |
| cg06035839  | 1  | 151119150 | SEMA6C                                                      | 0.00758489  | 0.554831571396892    | 0.0899460854241058 |
| cg11896633  | 8  | 144816335 | FAM83H                                                      | 0.00679912  | 0.533979048498942    | 0.0899957490546553 |
| cg00631837  | 22 | 45404212  | PHF21B;PHF21B                                               | 0.0269475   | 0.391109137604856    | 0.0900323072548394 |
| cg06323912  | 16 | 57481690  | CIAPIN1;COQ9                                                | 0.00980501  | 0.394080990277095    | 0.0900335594097384 |
| cg21250436  | 12 | 28570321  | CCDC91                                                      | -0.0460345  | -0.0766218192762251  | 0.0900335594097384 |
| cg02964602  | 2  | 203130213 | NOP58                                                       | 0.0752825   | 0.152876415256774    | 0.0900645673396424 |
| cg01301138  | 16 | 82660630  | CDH13;CDH13                                                 | 0.0174443   | 0.36818003493402     | 0.0900645673396424 |
| cg02184643  | 11 | 10879647  | ZBED5;ZBED5                                                 | 0.0242083   | 0.636736560379956    | 0.0901762175075386 |
| cg03285219  | 7  | 1499161   | MICALL2                                                     | 0.0141184   | 0.490779460139883    | 0.0901919697431964 |
| cg10435123  | 12 | 111127010 | HVCN1;HVCN1                                                 | -0.00370207 | -0.287078820934078   | 0.0901919697431964 |
| cg05751616  | 12 | 6652601   | IFFO1;IFFO1;IFFO1                                           | -0.066178   | -0.122194200738404   | 0.0902472450974356 |



|             |    |           |                                                                 |             |                      |                    |
|-------------|----|-----------|-----------------------------------------------------------------|-------------|----------------------|--------------------|
| cg24756528  | 16 | 4466888   | CORO7                                                           | 0.0401841   | 1.35431194815326     | 0.0902609423751755 |
| cg06435847  | 17 | 3562636   | CTNS;CTNS                                                       | -0.0130218  | -0.0196138950509004  | 0.0902672345691796 |
| cg01224647  | 16 | 25115281  | LCMT1-AS1                                                       | -0.0621152  | -0.121414245636576   | 0.0902672345691796 |
| cg0550371   | 3  | 49841167  | C3orf54                                                         | 0.0173444   | 0.697935622639103    | 0.0902672345691796 |
| cg08522257  | 3  | 152879782 | RAP2B                                                           | 0.0134015   | 0.48171656479822     | 0.0902672345691796 |
| cg22075671  | 5  | 133747798 | CDKN2AIPNL                                                      | 0.0105847   | 0.556025178229459    | 0.0902672345691796 |
| cg07041883  | 5  | 76476158  |                                                                 | 0.0125934   | 0.536133812931479    | 0.0902672345691796 |
| cg21401143  | 8  | 19171452  | SH2D4A;SH2D4A;SH2D4A                                            | 0.0225114   | 0.577192282494582    | 0.0902672345691796 |
| cg09571572  | 17 | 78010330  | CCDC40;TBC1D16                                                  | 0.00692833  | 0.501410686533137    | 0.0903046051667116 |
| cg09818962  | 17 | 39822215  |                                                                 | 0.0127285   | 0.500705821789464    | 0.0903139475354995 |
| cg17651140  | 1  | 40549220  | PPT1;PPT1                                                       | -0.0168746  | -0.0252953535772326  | 0.0903139475354995 |
| cg16970804  | 5  | 43042108  | LOC153684                                                       | 0.00861057  | 0.581492771307386    | 0.090386873972164  |
| cg18963377  | 6  | 167316609 | RPS6KA2-AS1                                                     | 0.0105852   | 0.0157964099072482   | 0.0904708299857034 |
| cg17090968  | 12 | 46663694  | SLC38A1;SLC38A1                                                 | 0.00888481  | 0.3194143011765225   | 0.0904915605356414 |
| cg21561038  | 10 | 21462743  | NEBL-AS1;NEBL-AS1;NEBL;NEBL                                     | 0.0225576   | 0.972798763316392    | 0.0904915605356414 |
| cg14471727  | 14 | 97263643  | VRK1                                                            | 0.0220367   | 0.471772229095459    | 0.090548874623423  |
| cg01538984  | 7  | 140396422 | LOC100134713;NDUFB2                                             | 0.0113637   | 0.483280669183773    | 0.090548874623423  |
| cg11083503  | 10 | 118508385 |                                                                 | -0.054397   | -0.107211260511199   | 0.090548874623423  |
| cg21737632  | 10 | 65281095  | REEP3                                                           | -0.0353494  | -0.442650488267473   | 0.090548874623423  |
| cg14021555  | 22 | 43485536  | TTL1;TTL1                                                       | 0.0173863   | 0.517045574367343    | 0.0905661510222531 |
| cg11113103  | 19 | 49122630  | RPL18;RPL18;RPL18;RPL18;SPHK2;SPHK2;SPHK2;SPHK2;SPHK2;SPHK2;RPL | 0.0288027   | 0.973889138784344    | 0.0905763321411287 |
| cg18209104  | 1  | 14893756  |                                                                 | -0.0325058  | -0.0523062273549708  | 0.0905763321411287 |
| cg27540114  | 14 | 61189963  | SIX4                                                            | 0.00585273  | 0.326416693037619    | 0.0906055321290435 |
| cg25631940  | 20 | 43589250  | TOMM34                                                          | 0.006369    | 0.375830443582782    | 0.0906055321290435 |
| cg03540175  | 3  | 49236946  | CCDC36;CCDC36;CCDC36                                            | 0.0639354   | 0.398502278536853    | 0.090627055133043  |
| cg13743031  | 4  | 178231244 | NEIL3                                                           | 0.00667902  | 0.301893496514918    | 0.090627055133043  |
| cg18714585  | 12 | 123868665 | SETD8                                                           | 0.0328051   | 0.65817420479791     | 0.090627055133043  |
| cg09463890  | 4  | 37960795  | PTTG2;TBC1D1                                                    | -0.0532027  | -0.10900392899386    | 0.090627055133043  |
| cg06630141  | 5  | 133862209 | JADE2;JADE2;JADE2;JADE2                                         | 0.011873    | 0.450522274477115    | 0.090627055133043  |
| cg01379428  | 5  | 180690432 | TRIM52-AS1;TRIM52-AS1;TRIM52-AS1;TRIM52-AS1                     | -0.0543412  | -0.0927053804116839  | 0.090627055133043  |
| cg06202686  | 2  | 170336108 | BBS5                                                            | 0.00988799  | 0.46130756875688     | 0.090627055133043  |
| cg16754864  | 2  | 96194596  |                                                                 | -0.0179942  | -0.0270634005272081  | 0.090627055133043  |
| cg18483269  | 19 | 11849691  | ZNF823;ZNF823                                                   | 0.00576264  | 0.376976251134755    | 0.090627055133043  |
| cg03933646  | 1  | 55317098  | DHCR24                                                          | -0.00663669 | -0.00980261003645949 | 0.090627055133043  |
| cg15803261  | 12 | 11049876  | PRH1-PRR4;PRH1;PRH1                                             | -0.0406528  | -0.0685927257379446  | 0.090627055133043  |
| cg15677368  | 1  | 245133209 | EFCAB2;EFCAB2;EFCAB2;EFCAB2;EFCAB2;EFCAB2                       | 0.0365588   | 0.360627849583909    | 0.090627055133043  |
| cg10209223  | 2  | 3523546   | ADI1                                                            | 0.00750741  | 0.497055329712522    | 0.090627055133043  |
| cg10073303  | 12 | 123718004 | C12orf65;C12orf65;C12orf65;MPHOSPH9;MPHOSPH9;C12orf65           | 0.0193268   | 0.822434352161164    | 0.090627055133043  |
| cg09843573  | 11 | 133797846 | IGSF9B                                                          | 0.026912    | 0.633021424478584    | 0.090627055133043  |
| cg15426734  | 16 | 67695272  | PARD6A;ACD;ACD;PARD6A;ACD                                       | 0.0217664   | 0.479958317091918    | 0.090627055133043  |
| cg04647948  | 2  | 206950423 | INO80D                                                          | 0.012844    | 0.444301651235364    | 0.090627055133043  |
| cg09172043  | 10 | 101025916 |                                                                 | -0.0461407  | -0.0841347603698404  | 0.090627055133043  |
| cg15735388  | 4  | 89788656  | FAM13A                                                          | -0.0429771  | -0.0705344307343358  | 0.090627055133043  |
| cg07326720  | 5  | 35614133  |                                                                 | -0.0483159  | -0.0957960738890387  | 0.090627055133043  |
| cg19357918  | 11 | 63953256  | STIP1                                                           | 0.0170446   | 0.809340783609111    | 0.090627055133043  |
| cg09516144  | 16 | 15982637  | C16orf63                                                        | 0.0104131   | 0.595289380028636    | 0.0906625193107016 |
| cg247011257 | 7  | 73097740  | WBSCR22;DNAJC30                                                 | 0.0135328   | 0.581450901979867    | 0.0906625193107016 |
| cg18293298  | 3  | 10053022  | LOC401052                                                       | 0.012345    | 0.431199817416152    | 0.0906625193107016 |
| cg20994084  | 17 | 79269488  | SLC38A10;SLC38A10                                               | 0.0137577   | 1.47901351876957     | 0.0906625193107016 |
| cg01772700  | 19 | 56904442  | ZNF582                                                          | -0.0473011  | -0.147846031960213   | 0.0906625193107016 |
| cg25098497  | 12 | 13254403  | GSG1;GSG1                                                       | 0.00432158  | 0.270244784333381    | 0.0907011818065967 |
| cg14732699  | 8  | 128750039 | MYC                                                             | 0.0220367   | 0.594101175618182    | 0.0907011818065967 |
| cg07304114  | 20 | 32309023  | PXMP4;PXMP4                                                     | 0.00698195  | 0.0103979250493127   | 0.0907651646858184 |
| cg13956914  | 16 | 75600119  | GABARAPL2                                                       | 0.0323995   | 1.09535402912993     | 0.0907651646858184 |
| cg08721076  | 2  | 172967670 | DLX2                                                            | 0.00347544  | 0.353647396323012    | 0.0907651646858184 |
| cg00823789  | 12 | 124001205 | RILPL1                                                          | -0.0728208  | -0.135286242978773   | 0.0907904666266143 |
| cg09932730  | 7  | 135198360 |                                                                 | -0.0615297  | -0.119469733514989   | 0.0907970210421057 |
| cg21463790  | 7  | 14025907  | ETV1;ETV1;ETV1;ETV1;ETV1;ETV1;ETV1;ETV1;ETV1                    | -0.0378508  | -0.0645613065241993  | 0.0907970210421057 |
| cg20557595  | 14 | 45381239  |                                                                 | 0.0504605   | 0.245267700704839    | 0.0907970210421057 |
| cg00852573  | 6  | 73331405  | KCNQ5;KCNQ5;KCNQ5;KCNQ5;KCNQ5                                   | 0.0356088   | 1.50847572051294     | 0.0907970210421057 |
| cg06820859  | 13 | 21564784  | LATS2                                                           | -0.026086   | -0.0409398256156025  | 0.0907970210421057 |
| cg01173563  | 15 | 73027500  | BBS4;BBS4;BBS4;BBS4                                             | 0.013642    | 0.0211837781945181   | 0.0907970210421057 |
| cg22860780  | 7  | 48128351  | UPP1;UPP1                                                       | 0.0209302   | 0.480281322971092    | 0.0907970210421057 |
| cg00350409  | 1  | 38354007  | INPP5B;INPP5B;INPP5B;INPP5B                                     | 0.0105846   | 0.0160875338857157   | 0.0907970210421057 |
| cg01896926  | 17 | 685509    | GLOD4;GLOD4;RNMTL1                                              | 0.0295923   | 1.27690720842614     | 0.0907970210421057 |
| cg25984791  | 11 | 108535797 | DDX10                                                           | 0.010009    | 0.431877211691899    | 0.0907970210421057 |
| cg13654902  | 19 | 38853053  | CATSPERG                                                        | 0.0650196   | 1.27167914817665     | 0.0907970210421057 |
| cg10628818  | 1  | 38100255  | RSPO1;RSPO1                                                     | 0.012648    | 0.285556145723062    | 0.0907970210421057 |
| cg21841682  | 14 | 69445844  | ACTN1;ACTN1;ACTN1;ACTN1;ACTN1                                   | 0.0126227   | 0.856297785312806    | 0.0908179133432813 |
| cg25809066  | 19 | 58962741  | ZNF324B                                                         | 0.0151833   | 0.551129613497316    | 0.0908179133432813 |
| cg15695045  | 1  | 204330069 | PLEKHA6                                                         | -0.133814   | -0.264596282317313   | 0.0908179133432813 |
| cg1582100   | 2  | 171673207 | GAD1;GAD1;GAD1;GAD1                                             | 0.00238725  | 0.288746415404093    | 0.0908179133432813 |
| cg26115218  | 3  | 149756649 |                                                                 | -0.0166513  | -0.0257113235964344  | 0.0908179133432813 |
| cg01181817  | 3  | 49941376  | MST1R                                                           | 0.00665833  | 0.604988364419163    | 0.0908179133432813 |
| cg08554936  | 19 | 46519866  | CCDC61                                                          | 0.0302985   | 0.76424603553246     | 0.0908179133432813 |
| cg11888151  | 22 | 21272339  | CRKL                                                            | 0.00477918  | 0.506321707231244    | 0.0908179133432813 |
| cg23587044  | 3  | 196777478 | DLG1;DLG1;DLG1;DLG1;DLG1                                        | -0.115322   | -0.327651350252905   | 0.0908675146196271 |
| cg11726911  | 1  | 6211420   | CHD5                                                            | 0.018656    | 0.572196649779756    | 0.0908675146196271 |
| cg23517677  | 11 | 62528272  | POLR2G                                                          | -0.0298919  | -0.0457578868862335  | 0.0908675146196271 |
| cg25009629  | 6  | 41748519  | FRS3;PRICKLE4;PRICKLE4                                          | 0.0230464   | 0.838642369727285    | 0.0909180766285681 |
| cg08616681  | 16 | 718778    | RHOT2                                                           | 0.0294615   | 0.429907326735942    | 0.0909180766285681 |
| cg23829577  | 6  | 160183769 | ACAT2                                                           | 0.0120205   | 0.599659922292844    | 0.0909180766285681 |

|            |    |           |                                                     |             |                      |                    |
|------------|----|-----------|-----------------------------------------------------|-------------|----------------------|--------------------|
| cg07090470 | 3  | 43437351  | ANO10;ANO10;ANO10;ANO10;ANO10                       | -0.0381264  | -0.062759497916456   | 0.0909180766285681 |
| cg04977109 | 17 | 46125622  | NFE2L1                                              | 0.0255535   | 0.994010442747188    | 0.0909180766285681 |
| cg14266436 | 19 | 34302242  | KCTD15;KCTD15;KCTD15                                | -0.0436332  | -0.0720338003432369  | 0.0909180766285681 |
| cg11128799 | 2  | 42721159  | KCNG3;KCNG3;MTA3;KCNG3;KCNG3                        | 0.0410464   | 0.142134951470348    | 0.0909180766285681 |
| cg24083067 | 19 | 48972665  | CYTH2;CYTH2;CYTH2;CYTH2                             | 0.0195399   | 0.708152850819588    | 0.0909180766285681 |
| cg17524151 | 16 | 475494    | RAB11FIP3                                           | 0.0225701   | 0.831619308960316    | 0.0909622749539427 |
| cg09481234 | 17 | 8013680   | ALOXE3;ALOXE3                                       | 0.0295715   | 0.450885535546941    | 0.0909622749539427 |
| cg22136703 | 16 | 2255607   | MLST8;MLST8;MLST8;MLST8                             | 0.0217289   | 0.561042207780257    | 0.0909622749539427 |
| cg09662051 | 2  | 162164883 | PSMD14;PSMD14                                       | 0.00473581  | 0.34871376231168     | 0.0909622749539427 |
| cg19287103 | 12 | 7055672   | PTPN6                                               | 0.0143012   | 0.428601945313993    | 0.0909622749539427 |
| cg21724010 | 6  | 164990879 |                                                     | -0.056111   | -0.145089689602394   | 0.0909622749539427 |
| cg24072640 | 20 | 48291209  | B4GALT5                                             | -0.0946469  | -0.181448052457411   | 0.0909622749539427 |
| cg02280021 | 10 | 134808594 |                                                     | -0.0114874  | -0.0170875588986747  | 0.0909622749539427 |
| cg25023275 | 18 | 35146450  | BRUNOL4;BRUNOL4;BRUNOL4;BRUNOL4                     | 0.0139402   | 0.319112821936367    | 0.0909622749539427 |
| cg27590781 | 2  | 152266272 | RIF1                                                | 0.00476435  | 0.398264321947668    | 0.0909622749539427 |
| cg00574251 | 2  | 164965991 |                                                     | -0.0327128  | -0.0518636098685364  | 0.0909622749539427 |
| cg18635645 | 1  | 85667791  | SYDE2                                               | 0.00840205  | 0.32373197045284     | 0.0909622749539427 |
| cg03309421 | 7  | 32535387  | LSM5;AVL9;LSM5                                      | 0.0222      | 0.667292660228334    | 0.0910017133229697 |
| cg17389835 | 19 | 46147025  | EML2;EML2                                           | 0.0136172   | 0.661453203578696    | 0.0910017133229697 |
| cg05289466 | 19 | 5057455   | KDM4B                                               | -0.0520533  | -0.0930785053363667  | 0.0910017133229697 |
| cg03868679 | 2  | 160595278 | MARCH7;MARCH7;MARCH7;MARCH7                         | -0.0697049  | -0.180081163733322   | 0.0910017133229697 |
| cg12994587 | 22 | 41777817  | TEF;TEF                                             | 0.0365332   | 0.889545876706796    | 0.091005024436104  |
| cg06467674 | 4  | 159315123 |                                                     | -0.0380307  | -0.0704208894072944  | 0.091005024436104  |
| cg23499823 | 11 | 507502    | RNH1;RNH1;RNH1;RNH1;RNH1;RNH1;RNH1                  | 0.01829     | 0.701056554128925    | 0.091005024436104  |
| cg03521358 | 1  | 9242937   |                                                     | 0.0195668   | 0.448409532283678    | 0.091005024436104  |
| cg09238957 | 16 | 46723420  | ORC6L;VPS35                                         | 0.0303459   | 1.12074490834003     | 0.091005024436104  |
| cg15893127 | 1  | 153756397 |                                                     | 0.0139728   | 0.427767254112897    | 0.091005024436104  |
| cg13914708 | 2  | 15804963  |                                                     | -0.0128349  | -0.0194393878993528  | 0.091005024436104  |
| cg21809257 | 1  | 154955635 | FLAD1;FLAD1                                         | 0.00361625  | 0.26393203057552     | 0.091005024436104  |
| cg16057435 | 5  | 75912664  | F2RL2;IQGAP2                                        | -0.0376022  | -0.0612158583995704  | 0.091005024436104  |
| cg04106948 | 2  | 104408389 |                                                     | -0.0392635  | -0.0751924901014443  | 0.091005024436104  |
| cg11992550 | 15 | 89533607  |                                                     | -0.0875043  | -0.193949580581377   | 0.091005024436104  |
| cg22555392 | 3  | 50649683  | CISH;CISH                                           | 0.0034021   | 0.283806629054701    | 0.091005024436104  |
| cg06657142 | 10 | 123357993 | FGFR2;FGFR2;FGFR2;FGFR2;FGFR2                       | 0.0163639   | 0.38668401095626     | 0.091005024436104  |
| cg07190698 | 4  | 331458    | ZNF141                                              | 0.0139708   | 0.64537351703444     | 0.091005024436104  |
| cg23167456 | 1  | 27942186  | FGR;FGR;FGR                                         | 0.00206031  | 0.00302582984556791  | 0.0910898520296624 |
| cg26600181 | 4  | 7105115   | FLJ36777                                            | 0.0165686   | 0.623311509406897    | 0.0911305496711236 |
| cg07318284 | 4  | 154170590 | TRIM2;TRIM2                                         | -0.00442221 | -0.272247935073215   | 0.0911305496711236 |
| cg09629119 | 3  | 71547974  | FOXP1;FOXP1;FOXP1;FOXP1;FOXP1                       | -0.0333791  | -0.0529668284216774  | 0.0911305496711236 |
| cg21028463 | 17 | 74733682  | MIR636;SFRS2;MFSD11                                 | 0.0419539   | 1.08290613232277     | 0.0911305496711236 |
| cg01683883 | 16 | 66613053  | CMTM2                                               | 0.0176762   | 0.652362151782283    | 0.091133585834963  |
| cg16344026 | 5  | 149109979 | PPARGC1B                                            | 0.0327061   | 0.597119350741966    | 0.091133585834963  |
| cg20366603 | 17 | 7218821   | GPS2                                                | 0.0159375   | 0.40943808044475     | 0.091133585834963  |
| cg00391018 | 13 | 49049400  | RB1                                                 | -0.0341669  | -0.05289780555932    | 0.0911715026045264 |
| cg27268717 | 7  | 56032047  | GBAS                                                | 0.0124652   | 0.516629012306463    | 0.0911724132407382 |
| cg21066720 | 6  | 32966587  |                                                     | -0.0159653  | -0.0244203454446546  | 0.0911750795028031 |
| cg20526663 | 16 | 22385655  | CDR2;CDR2                                           | 0.0102539   | 0.397866286995331    | 0.0912114975110082 |
| cg09286909 | 1  | 213031599 | FLVCR1-AS1;FLVCR1-AS1;FLVCR1;FLVCR1                 | 0.00984548  | 0.685187971894209    | 0.09121703006949   |
| cg07934232 | 19 | 36619082  |                                                     | 0.0177086   | 0.84149487622946     | 0.0912179761210085 |
| cg01496602 | 7  | 156263586 |                                                     | -0.0351489  | -0.0572389093903584  | 0.0912305539694855 |
| cg00290498 | 5  | 1230850   | SLC6A18                                             | -0.0322519  | -0.0523115662260083  | 0.0912305539694855 |
| cg01321158 | 16 | 31128800  | MYST1;MYST1                                         | 0.0210209   | 0.936964083093458    | 0.0912357120677123 |
| cg17896927 | 15 | 93617030  | RGMA;RGMA;RGMA;RGMA;RGMA;RGMA                       | 0.0357242   | 0.489848679098688    | 0.0912357120677123 |
| cg20655434 | 11 | 67159118  | LOC100130987;RAD9A                                  | -0.00196301 | -0.273133077448879   | 0.0912357120677123 |
| cg04409495 | 17 | 38083144  | ORMDL3                                              | 0.014484    | 0.653615811025692    | 0.0912357120677123 |
| cg08112354 | 14 | 105452552 | C14orf79                                            | 0.0148657   | 0.7596126969899312   | 0.0912357120677123 |
| cg21809762 | 11 | 94702500  | CWC15                                               | -0.017885   | -0.026979992014506   | 0.0912357120677123 |
| cg17872999 | 7  | 104653783 | MLL5;LOC100216545;MLL5                              | 0.0075214   | 0.53852431797974     | 0.0912357120677123 |
| cg20487890 | 1  | 185402344 |                                                     | -0.0624233  | -0.104820846172299   | 0.0912357120677123 |
| cg03710353 | 5  | 1491489   | LPCAT1                                              | 0.0175982   | 0.0271833305169448   | 0.0912357120677123 |
| cg24266670 | 11 | 115630629 |                                                     | 0.0330205   | 0.577637797104943    | 0.0912357120677123 |
| cg24632597 | 12 | 121648093 | P2RX4                                               | 0.00937731  | 0.617982355521267    | 0.0912357120677123 |
| cg26922444 | 6  | 24911204  | FAM65B                                              | 0.0271162   | 0.53156073615019     | 0.0912379497460371 |
| cg10458392 | 19 | 3600539   | TBXA2R;TBXA2R                                       | -0.0382267  | -0.0650391571357224  | 0.091500197675576  |
| cg11065931 | 1  | 89487064  | GBP3                                                | -0.0843303  | -0.231955325241039   | 0.091546023514121  |
| cg07261517 | 22 | 20105424  | RANBP1;TRMT2A;TRMT2A                                | 0.00722251  | 0.478415826032103    | 0.091546023514121  |
| cg13840089 | 9  | 80201784  | GNA14                                               | -0.0435847  | -0.0732890116915495  | 0.091546023514121  |
| cg01769392 | 6  | 169286420 |                                                     | -0.0360021  | -0.0651291554626421  | 0.091546023514121  |
| cg11755740 | 8  | 9413382   | TNKS                                                | 0.0113874   | 0.709383650034987    | 0.091546023514121  |
| cg11217574 | 12 | 56522261  | ESYT1                                               | 0.00875956  | 0.509459233398196    | 0.091546023514121  |
| cg05002732 | 11 | 19262474  | E2F8;E2F8                                           | 0.0113302   | 0.388847343869853    | 0.091546023514121  |
| cg24450312 | 1  | 206681158 | RASSF5;RASSF5                                       | 0.0270271   | 0.587785271475057    | 0.0915586925899091 |
| cg10480748 | 5  | 176730599 | RAB24;RAB24;RAB24;RAB24;RAB24;RAB24;PRELID1;PRELID1 | 0.00831445  | 0.640943503160943    | 0.0915586925899091 |
| cg04966789 | 14 | 35591779  | PPP2R3C;KIAA0391;KIAA0391                           | 0.0127574   | 0.557141669541884    | 0.0916396353278088 |
| cg02002281 | 11 | 66053209  | YIF1A;YIF1A;YIF1A;YIF1A                             | 0.0159951   | 0.0242269332593648   | 0.0916560153278113 |
| cg02620388 | 7  | 100271115 | GNB2                                                | 0.00698103  | 0.414424913073269    | 0.0916560153278113 |
| cg12542506 | 16 | 58133216  |                                                     | -0.00558149 | -0.00820250317866611 | 0.0917033076388215 |
| cg03909721 | 19 | 3512684   | FZR1                                                | 0.012279    | 0.0192574423896919   | 0.0917691562909892 |
| cg17951368 | 11 | 17298273  | NUCB2                                               | 0.00619459  | 0.354976615508115    | 0.0917691562909892 |
| cg10668512 | 15 | 42565522  | GANC;TMEM87A;TMEM87A                                | 0.0218945   | 0.540799638595639    | 0.0917691562909892 |
| cg00504756 | 16 | 74330795  | PSMD7;PSMD7                                         | 0.0370362   | 0.96953735566908     | 0.0917691562909892 |
| cg15000794 | 7  | 86849844  | C7orf23                                             | 0.0121189   | 0.690090082947626    | 0.0917691562909892 |



|             |    |           |                                                                     |            |                     |                    |
|-------------|----|-----------|---------------------------------------------------------------------|------------|---------------------|--------------------|
| cg21969990  | 20 | 36852920  | KIAA1755                                                            | -0.0815806 | -0.170322989219672  | 0.092714281170691  |
| cg07199894  | 12 | 132379104 | ULK1                                                                | 0.0611781  | 0.282034947934652   | 0.092714281170691  |
| cg14732136  | 17 | 66031828  | KPNA2                                                               | 0.0208485  | 1.15848928380308    | 0.092714281170691  |
| cg23185402  | 16 | 47495113  | PHKB;PHKB;ITFG1                                                     | 0.00639299 | 0.550825023683847   | 0.092714281170691  |
| cg21677767  | 7  | 138227378 | TRIM24;TRIM24                                                       | -0.0495865 | -0.0869567648289732 | 0.092714281170691  |
| cg21229103  | 9  | 140738145 |                                                                     | -0.0274885 | -0.0425576881100855 | 0.092714281170691  |
| cg06616408  | 5  | 92926504  | NR2F1;MIR548AO                                                      | -0.0583091 | -0.167597544957636  | 0.092714281170691  |
| cg25406779  | 19 | 40732712  | CNTD2                                                               | 0.0191783  | 0.310527859795983   | 0.092714281170691  |
| cg12158389  | 1  | 38230244  | EPHA10;EPHA10                                                       | 0.0251118  | 0.531770136120337   | 0.092714281170691  |
| cg09813341  | 12 | 122665500 | LRRC43                                                              | -0.109237  | -0.221052576309218  | 0.092714281170691  |
| cg19749898  | 11 | 1712765   | HCCA2                                                               | -0.0261742 | -0.0411433976926592 | 0.092714281170691  |
| cg08782481  | 6  | 27839916  | HIST1H3I                                                            | 0.0672372  | 0.46765271345902    | 0.092714281170691  |
| cg09932345  | 1  | 1710561   | NADK                                                                | 0.0156647  | 0.920641035327018   | 0.092714281170691  |
| cg23473088  | 12 | 54529138  |                                                                     | -0.0133363 | -0.0199357123476128 | 0.092714281170691  |
| cg11877270  | 2  | 65658583  | SPRED2                                                              | 0.0352277  | 1.19762395540624    | 0.092714281170691  |
| cg14561881  | 17 | 62503076  | CCDC45;DDX5                                                         | 0.0125157  | 0.525847482423603   | 0.0928474024784932 |
| cg05744193  | 2  | 201828499 | ORC2;ORC2                                                           | 0.0222355  | 0.852093842548394   | 0.0928562390610881 |
| cg22956310  | 2  | 25142878  | ADCY3                                                               | 0.0109171  | 0.428381518877687   | 0.0928595676565089 |
| cg07320742  | 7  | 27844237  | TAX1BP1;TAX1BP1;TAX1BP1;TAX1BP1                                     | -0.0621897 | -0.117278634412371  | 0.0928595676565089 |
| cg02140403  | 20 | 17711766  | BANF2;BANF2;BANF2                                                   | -0.0272418 | -0.0423037217599701 | 0.0928595676565089 |
| cg21267291  | 20 | 17549945  | DSTN;DSTN;BFSP1                                                     | 0.0153579  | 0.370886281969472   | 0.0928595676565089 |
| cg26034219  | 15 | 59887797  |                                                                     | -0.0259782 | -0.0466184068517873 | 0.0928595676565089 |
| cg06948384  | 14 | 102504676 | DYNC1H1                                                             | -0.0280954 | -0.0431952639091703 | 0.0928595676565089 |
| cg15793624  | 1  | 201476495 | CSRP1;CSRP1;CSRP1                                                   | 0.0371184  | 1.42378490240184    | 0.0928595676565089 |
| cg24088279  | 16 | 69155473  | CHTF8;CHTF8;CHTF8                                                   | -0.042511  | -0.0709978896267638 | 0.0928595676565089 |
| cg03399170  | 20 | 19719632  |                                                                     | -0.0356959 | -0.0627116430060074 | 0.0928595676565089 |
| cg15798823  | 7  | 22866267  |                                                                     | -0.0344405 | -0.0564363851738888 | 0.0928595676565089 |
| cg11342046  | 2  | 242641489 | ING5                                                                | 0.0158946  | 0.603734784046696   | 0.092912792216469  |
| cg10643407  | 5  | 131892523 | RAD50;RAD50                                                         | 0.00968752 | 0.31775167463574    | 0.092912792216469  |
| cg15572423  | 6  | 30307205  | TRIM39;TRIM39                                                       | -0.0879835 | -0.158285640623321  | 0.092912792216469  |
| cg05349650  | 16 | 20753199  | THUMP1                                                              | 0.0169613  | 0.760684859907776   | 0.092912792216469  |
| cg24108888  | 6  | 32849992  |                                                                     | -0.0850822 | -0.174571496457207  | 0.092912792216469  |
| cg13710842  | 5  | 72251735  | FCHO2;FCHO2                                                         | 0.0203479  | 0.928696584108214   | 0.092912792216469  |
| cg02727444  | 19 | 12175631  | ZNF844;ZNF844                                                       | 0.0244625  | 0.655864133452548   | 0.092912792216469  |
| cg05479174  | 12 | 132239000 | SFRS8                                                               | -0.0149635 | -0.0224258488777245 | 0.092912792216469  |
| cg11328704  | 5  | 108063900 |                                                                     | 0.0074796  | 0.460678561404129   | 0.092912792216469  |
| cg13650683  | 14 | 44010797  |                                                                     | -0.0719523 | -0.13241010388866   | 0.092912792216469  |
| cg23154002  | 22 | 31741741  | PATZ1;PATZ1;PATZ1;PATZ1;PATZ1;PATZ1;PATZ1;PATZ1                     | 0.00417673 | 0.474092750681754   | 0.0929196388773307 |
| cg02655287  | 4  | 1006115   | FGFRL1;FGFRL1;FGFRL1                                                | 0.0167927  | 0.520439172793701   | 0.0929273445128552 |
| cg01316323  | 22 | 26946742  | TPST2;TPST2                                                         | -0.0287168 | -0.0461091498589716 | 0.0929385374382797 |
| cg18011274  | 17 | 43213270  | ACBD4;ACBD4;ACBD4;ACBD4;ACBD4;ACBD4;ACBD4;ACBD4;ACBD4               | 0.0107513  | 0.440599589502567   | 0.0930855909060635 |
| cg16324018  | 2  | 85580627  | ELMOD3;ELMOD3;ELMOD3;RETSAT;ELMOD3                                  | -0.0230978 | -0.0357062866685709 | 0.0930951112393189 |
| cg18473033  | 17 | 47653564  | NXP3;NXP3                                                           | 0.0307732  | 0.983208595167649   | 0.0931034652900766 |
| cg21251646  | 6  | 31772441  | 2,00 LSM                                                            | -0.0511745 | -0.119448880487942  | 0.0932137136222129 |
| cg11216682  | 2  | 131113867 | PTPN18;PTPN18                                                       | 0.0438463  | 0.377010810093872   | 0.0932460828570672 |
| cg16458021  | 21 | 43430507  | ZNF295;ZNF295;ZNF295                                                | 0.0144788  | 0.824416971062606   | 0.0933407762620055 |
| cg13991635  | 5  | 131133339 | FNIP1;FNIP1                                                         | 0.00942578 | 0.394800661286533   | 0.0933407762620055 |
| cg03630344  | 1  | 7831156   | VAMP3                                                               | 0.00337721 | 0.267688188861655   | 0.0933407762620055 |
| cg08177439  | 3  | 186284992 | TBCCD1;TBCCD1;TBCCD1                                                | 0.0265939  | 1.11028443237073    | 0.0933407762620055 |
| cg00145284  | 1  | 58852326  |                                                                     | -0.0710099 | -0.116976229698956  | 0.0933407762620055 |
| cg13406896  | 2  | 10220712  | CYS1                                                                | 0.0301403  | 0.463221488095486   | 0.0933407762620055 |
| cg14229774  | 1  | 179198798 | ABL2;ABL2;ABL2;ABL2;ABL2;ABL2;ABL2;ABL2                             | 0.00912094 | 0.390466945830393   | 0.0933407762620055 |
| cg17613375  | 17 | 55162322  | AKAP1                                                               | 0.0217997  | 0.722263495203747   | 0.0933407762620055 |
| cg17960516  | 4  | 3465004   | DOK7;DOK7                                                           | 0.0149192  | 0.435320458425441   | 0.0933407762620055 |
| cg097711049 | 17 | 66031798  | KPNA2                                                               | 0.0396895  | 0.972549910105994   | 0.0933407762620055 |
| cg06468068  | 2  | 147479064 |                                                                     | -0.0227966 | -0.0389602844600166 | 0.0933407762620055 |
| cg06741536  | 12 | 69005242  | RAP1B;RAP1B                                                         | 0.0102886  | 0.432154447731189   | 0.0933407762620055 |
| cg04059937  | 8  | 144699788 | TSTA3                                                               | 0.00896429 | 0.401597629444575   | 0.0933407762620055 |
| cg08486060  | 5  | 180471692 | MIR8089;BTNL9;BTNL9                                                 | -0.0249334 | -0.0430156492200306 | 0.0933407762620055 |
| cg19358590  | 6  | 158654166 |                                                                     | 0.0071684  | 0.395390065507757   | 0.0933407762620055 |
| cg26425064  | 1  | 185290981 |                                                                     | -0.0305835 | -0.048924352931069  | 0.0933407762620055 |
| cg17237320  | 3  | 10053000  | LOC401052                                                           | 0.0250155  | 0.434060515374166   | 0.0933407762620055 |
| cg26290391  | 8  | 57672069  |                                                                     | 0.00532672 | 0.00799606846261881 | 0.0933407762620055 |
| cg09870092  | 9  | 80938588  | PSAT1;PSAT1                                                         | -0.046599  | -0.0767168699346119 | 0.0933495251333379 |
| cg16240572  | 3  | 134204857 | CEP63;CEP63;ANAPC13;CEP63;ANAPC13;CEP63;ANAPC13;CEP63;ANAPC13;CEP63 | 0.00753514 | 0.561476500402097   | 0.0934607790344545 |
| cg14375282  | 17 | 25981923  |                                                                     | 0.00887243 | 0.465012428036427   | 0.093500085517567  |
| cg26963271  | 1  | 66259081  | PDE4B;PDE4B                                                         | 0.00729294 | 0.449798586278492   | 0.0935815529244265 |
| cg18362448  | 19 | 18544419  | SSBP4;SSBP4                                                         | 0.0516041  | 0.210878722657714   | 0.0935815529244265 |
| cg06775669  | 7  | 101582572 | CUX1;CUX1;CUX1;CUX1;CUX1;CUX1                                       | -0.0512868 | -0.082297586286271  | 0.0935815529244265 |
| cg10348193  | 7  | 150020240 | LRRC61;ACTR3C;LRRC61                                                | 0.0267235  | 0.40884905254101    | 0.0935935084180323 |
| cg16523805  | 16 | 31076912  | ZNF668;ZNF668;ZNF668;ZNF668                                         | -0.0451869 | -0.0823445685386629 | 0.0935935084180323 |
| cg21843902  | 17 | 73847414  | WBP2                                                                | 0.00393767 | 0.00581366443742289 | 0.0935935084180323 |
| cg15975865  | 2  | 127413831 | GYPC;GYPC;GYPC;GYPC                                                 | 0.00332133 | 0.243668113147245   | 0.0935935084180323 |
| cg21705104  | 2  | 75144561  | LINC01291                                                           | -0.0121308 | -0.0182284182553724 | 0.0935935084180323 |
| cg01072217  | 7  | 1275483   | UNCX                                                                | 0.0331815  | 0.949574226388947   | 0.0935935084180323 |
| cg02274500  | 22 | 31064092  | DUSP18                                                              | 0.0105036  | 0.560766296494127   | 0.0935935084180323 |
| cg12980000  | 3  | 191035318 | UTS2D                                                               | -0.0127957 | -0.0194254144316437 | 0.0935935084180323 |
| cg04147657  | 18 | 47007789  | C18orf32;C18orf32;RPL17-C18orf32;RPL17-C18orf32                     | -0.0332563 | -0.0525194694301382 | 0.0935935084180323 |
| cg14723664  | 6  | 34164073  |                                                                     | 0.0161936  | 0.73987912998244    | 0.0935935084180323 |
| cg04811762  | 6  | 150039439 | LATS1                                                               | 0.0127232  | 0.435168171000494   | 0.0935935084180323 |
| cg12331743  | 10 | 104153933 | NFKB2;NFKB2;NFKB2                                                   | 0.0158576  | 0.432220611494856   | 0.0936659888660074 |
| cg01506492  | 2  | 219232590 | C2orf62                                                             | 0.011285   | 0.382524722291908   | 0.09368062038421   |



|            |    |           |                                                                   |             |                     |                     |
|------------|----|-----------|-------------------------------------------------------------------|-------------|---------------------|---------------------|
| cg06177407 | 11 | 65382100  | MAP3K11                                                           | 0.00986881  | 0.596911549565297   | 0.0941319734882328  |
| cg14398946 | 9  | 132258775 |                                                                   | 0.0242788   | 0.616805589536861   | 0.0941319734882328  |
| cg07095995 | 4  | 110223980 | COL25A1;COL25A1                                                   | 0.00642541  | 0.246813525389689   | 0.0941319734882328  |
| cg08153345 | 12 | 2862084   |                                                                   | 0.0140692   | 0.676189203591728   | 0.0941319734882328  |
| cg06840699 | 14 | 23058112  | DAD1;DAD1                                                         | -0.00168486 | -0.25211547433813   | 0.0941319734882328  |
| cg21548772 | 3  | 47422338  | PTPN23                                                            | 0.0103198   | 0.657361061017372   | 0.0941319734882328  |
| cg16218980 | 15 | 93631991  | RGMA;RGMA                                                         | 0.021678    | 0.882344459667338   | 0.0941319734882328  |
| cg23853020 | 9  | 134141052 | FAM78A                                                            | -0.0740889  | -0.146989034541215  | 0.0941319734882328  |
| cg03217460 | 11 | 70117060  | PPF1A1;PPF1A1                                                     | 0.0109866   | 0.371872308848139   | 0.0941319734882328  |
| cg06557577 | 12 | 56220139  | DNAJC14                                                           | -0.0322449  | -0.0505966883295371 | 0.0941319734882328  |
| cg07061692 | 19 | 59010811  | SLC27A5                                                           | 0.0101816   | 0.606962955787493   | 0.0941319734882328  |
| cg04051690 | 2  | 95825276  | ZNF514                                                            | 0.0126393   | 0.522706237308925   | 0.0941319734882328  |
| cg24275354 | 2  | 240964415 | NDUFA10                                                           | 0.00876001  | 0.539664635093064   | 0.0941319734882328  |
| cg12856612 | 22 | 42228819  | SREBF2                                                            | 0.0105632   | 0.584337760807839   | 0.0941319734882328  |
| cg01606127 | 8  | 61588765  |                                                                   | -0.0226692  | -0.0349165667073932 | 0.0941742530850551  |
| cg11236850 | 4  | 8443022   | ACOX3;ACOX3                                                       | 0.0173265   | 0.731677274250301   | 0.0941742530850551  |
| cg00533749 | 1  | 9992130   | LZIC                                                              | -0.0634347  | -0.121933508905673  | 0.0941742530850551  |
| cg19642128 | 8  | 2624703   | BNIP3L                                                            | 0.0310462   | 1.06773644847556    | 0.0941742530850551  |
| cg04023028 | 11 | 60681612  | TMEM109;TMEM109                                                   | 0.0101589   | 0.700645049679181   | 0.0941742530850551  |
| cg11063256 | 19 | 52511428  | ZNF615;ZNF615;ZNF615;ZNF615                                       | 0.0143605   | 0.418515800747818   | 0.0941764782362578  |
| cg00332680 | 10 | 74079303  |                                                                   | 0.0138279   | 0.661390057666328   | 0.0941764782362578  |
| cg05258261 | 3  | 140770608 | SPSB4                                                             | 0.0276137   | 0.701572246027919   | 0.0941764782362578  |
| cg17373321 | 8  | 21999520  | REEP4;REEP4                                                       | 0.0156194   | 0.624189990860204   | 0.0942029584494113  |
| cg01808603 | 16 | 66408919  | CDH5                                                              | -0.0472088  | -0.0813903557864951 | 0.0942029584494113  |
| cg00503587 | 20 | 18118441  | PET117                                                            | 0.0147785   | 0.973720535758548   | 0.0942029584494113  |
| cg23233137 | 6  | 42532021  | UBR2                                                              | 0.00991221  | 0.5111795829917619  | 0.0942029584494113  |
| cg23170588 | 7  | 100161127 | AGFG2                                                             | 0.00697325  | 0.0103395773931544  | 0.0942029584494113  |
| cg11281907 | 9  | 77948925  |                                                                   | -0.0355748  | -0.060683606416549  | 0.0942029584494113  |
| cg09588492 | 16 | 25266553  | ZKSCAN2                                                           | -0.0153155  | -0.0243913558438142 | 0.0942029584494113  |
| cg12216772 | 10 | 46164062  | ANUBL1;ANUBL1                                                     | -0.0927574  | -0.167293276308685  | 0.0942029584494113  |
| cg09662431 | 10 | 73975914  | ASCC1;C10orf104                                                   | 0.0107943   | 0.385105024888405   | 0.0942029584494113  |
| cg24502682 | 10 | 22634192  | SPAG6;SPAG6;SPAG6;SPAG6                                           | 0.022571    | 0.340490258313517   | 0.0942029584494113  |
| cg02854490 | 7  | 144108266 |                                                                   | -0.0475194  | -0.0785462169430961 | 0.0942029584494113  |
| cg00281153 | 16 | 75682798  | TERF2IP;KARS;KARS                                                 | 0.0205808   | 0.250894205731629   | 0.0942029584494113  |
| cg02311181 | 19 | 14180847  |                                                                   | -0.0219994  | -0.034079045933374  | 0.0942029584494113  |
| cg07344583 | 15 | 89456631  | MFGE8;MFGE8;MFGE8;MFGE8                                           | 0.0141302   | 0.800204815005168   | 0.0942029584494113  |
| cg16538178 | 16 | 85647585  | KIAA0182;KIAA0182                                                 | 0.0237435   | 0.634619327428556   | 0.0942029584494113  |
| cg10009297 | 17 | 34890195  | MYO19;MYO19;MYO19;PIGW                                            | 0.0181645   | 0.663507843786797   | 0.0942029584494113  |
| cg14944395 | 17 | 53898959  | MIS12;MIS12;MIS12;MIS12;MIS12;MIS12;MIS12;DERL2;DERL2;DERL2;DERL2 | 0.0366884   | 1.1668480450521     | 0.0942029584494113  |
| cg09950479 | 7  | 80610724  |                                                                   | -0.0679747  | -0.132318091878035  | 0.0942029584494113  |
| cg10055227 | 16 | 58768320  | GOT2                                                              | 0.0257212   | 0.600533289621663   | 0.0942029584494113  |
| cg03771121 | 16 | 8962586   | CARHSP1;CARHSP1                                                   | 0.004641    | 0.306121829574271   | 0.0942029584494113  |
| cg11808885 | 21 | 46438743  |                                                                   | 0.0130681   | 0.382354882255387   | 0.0942029584494113  |
| cg13722539 | 11 | 64085131  | PRDX5;PRDX5;TRMT112;PRDX5                                         | 0.00593804  | 0.40647328715405    | 0.0942029584494113  |
| cg21123913 | 4  | 89513664  | HERC3;HERC3                                                       | 0.0280158   | 0.64374571361161    | 0.0942029584494113  |
| cg24689245 | 11 | 75479679  | DGAT2                                                             | 0.00443615  | 0.334026815861528   | 0.0942029584494113  |
| cg03754180 | 13 | 37494042  | SMAD9;SMAD9                                                       | 0.00777242  | 0.462376695262537   | 0.0942029584494113  |
| cg10265095 | 19 | 51699773  |                                                                   | -0.0164252  | -0.0260921799165877 | 0.0942029584494113  |
| cg01879556 | 21 | 43932043  | SLC37A1                                                           | -0.0288269  | -0.047430768774293  | 0.0942029584494113  |
| cg16739583 | 2  | 216476434 | LINC00607                                                         | -0.0151915  | -0.0243291701506648 | 0.0942029584494113  |
| cg17018976 | 3  | 239036    | CHL1;CHL1;CHL1                                                    | 0.0554454   | 0.27734024278149    | 0.0942029584494113  |
| cg25991122 | 5  | 179246250 | SQSTM1;SQSTM1                                                     | 0.0115493   | 0.372253613037197   | 0.0942029584494113  |
| cg14170756 | 1  | 16563782  | C1orf89                                                           | 0.00342375  | 0.408866859540687   | 0.0942029584494113  |
| cg04372675 | 8  | 107283146 | OXR1                                                              | 0.0185447   | 0.510015571407564   | 0.0942029584494113  |
| cg07062933 | 8  | 134309859 | NDRG1;NDRG1                                                       | 0.0313029   | 0.713002855635746   | 0.0942029584494113  |
| cg10367730 | 10 | 120938495 | PRDX3;PRDX3                                                       | -0.0114261  | -0.280327474319605  | 0.0942029584494113  |
| cg06627580 | 7  | 6630016   | C7orf26;C7orf26                                                   | 0.0191523   | 0.278120662424037   | 0.0942029584494113  |
| cg18675644 | 2  | 61634300  | USP34                                                             | -0.0538897  | -0.0871063811774781 | 0.0942089396365906  |
| cg13372487 | 8  | 37685049  | GPR124                                                            | 0.00642548  | 0.00972792281931042 | 0.0942089396365906  |
| cg03871887 | 1  | 182295580 |                                                                   | -0.0152577  | -0.023758936414277  | 0.0942512511864926  |
| cg07800627 | 5  | 155916319 | SGCD;SGCD;SGCD                                                    | -0.0835908  | -0.17057147875694   | 0.0942512511864926  |
| cg05187833 | 6  | 17706939  | NUP153                                                            | 0.022192    | 1.11683100296449    | 0.0942512511864926  |
| cg05300996 | 3  | 119814693 | GSK3B;GSK3B                                                       | 0.00846922  | 0.318333299994434   | 0.0942512511864926  |
| cg12591645 | 18 | 54684851  | WDR7;WDR7                                                         | -0.0222383  | -0.749216583581074  | 0.0942512511864926  |
| cg15074761 | 4  | 80219922  | LINC01088                                                         | -0.0190829  | -0.0290722801205355 | 0.0942838722725252  |
| cg19682595 | 22 | 30819402  | SEC14L2;SEC14L2;SEC14L2                                           | 0.00806291  | 0.520163783782118   | 0.0943198048197702  |
| cg16617633 | 10 | 95847325  | PLCE1;PLCE1-AS2;PLCE1;PLCE1                                       | -0.0340757  | -0.0532376873642853 | 0.0943198048197702  |
| cg02867162 | 16 | 1020843   | LMF1                                                              | 0.0145839   | 0.754035402941587   | 0.0943198048197702  |
| cg22084165 | 12 | 92294605  |                                                                   | -0.042225   | -0.0662295780694162 | 0.0943198048197702  |
| cg10720192 | 3  | 169492135 | MYNN;MYNN;MYNN;MYNN;MYNN                                          | -0.0106331  | -0.016594996698521  | 0.0943198048197702  |
| cg14994056 | 11 | 107992015 | ACAT1                                                             | 0.0194013   | 0.497183241224881   | 0.09432337889452003 |
| cg03406394 | 15 | 60296138  | FOXB1                                                             | 0.0227473   | 0.527101254370138   | 0.0943302710328005  |
| cg12173535 | 19 | 54694174  | MBOAT7;MBOAT7;MBOAT7;MBOAT7;TSEN34;TSEN34;TSEN34                  | 0.0440721   | 1.58746237183092    | 0.094381270124384   |
| cg10071602 | 16 | 2028740   | TBL3                                                              | -0.0524389  | -0.105387007189227  | 0.0943928772789986  |
| cg16063617 | 5  | 128430663 | ISOC1                                                             | 0.00690046  | 0.473897527209262   | 0.0943928772789986  |
| cg17360140 | 4  | 128886135 | C4orf29;MFSD8                                                     | 0.0339961   | 1.24264520881165    | 0.0943928772789986  |
| cg27096951 | 2  | 35324412  |                                                                   | -0.0612221  | -0.116612211949647  | 0.0943928772789986  |
| cg00641348 | 12 | 72105415  |                                                                   | -0.0672365  | -0.114705436291188  | 0.0944156391226568  |
| cg08221175 | 14 | 69444840  | ACTN1;ACTN1;ACTN1                                                 | 0.0136981   | 0.448663834397662   | 0.094466808484364   |
| cg03108257 | 1  | 115125395 | BCAS2                                                             | -0.00802168 | -0.0119148247035711 | 0.094466808484364   |
| cg06744740 | 14 | 56584485  | PELI2                                                             | -0.0434321  | -0.530433727489889  | 0.0945361333338419  |
| cg00204782 | 22 | 19753364  | TBX1;TBX1;TBX1                                                    | 0.012929    | 0.42969495333622    | 0.0945456998672238  |

|               |    |           |                                                         |             |                     |                    |
|---------------|----|-----------|---------------------------------------------------------|-------------|---------------------|--------------------|
| cg09230996    | 10 | 102498419 |                                                         | 0.0172295   | 0.35198347587174    | 0.0945456998672238 |
| cg14112555    | 6  | 135799233 | AHI1;AHI1;AHI1;AHI1                                     | -0.0593355  | -0.106320605844585  | 0.0945470383707454 |
| cg24337786    | 19 | 39108672  | MAP4K1;EIF3K;MAP4K1                                     | 0.00848789  | 0.60389455276105    | 0.0945470383707454 |
| cg06109680    | 7  | 148725758 | PDIA4;PDIA4                                             | 0.0106805   | 0.604062516440381   | 0.0945470383707454 |
| cg16931877    | 3  | 32726605  | CNOT10                                                  | 0.038075    | 0.288833515265243   | 0.0945470383707454 |
| cg24257740    | 3  | 79067775  | ROBO1;ROBO1;ROBO1;ROBO1;ROBO1                           | 0.00496913  | 0.295454030748769   | 0.0945666176831024 |
| cg03115547    | 19 | 32836416  | ZNF507;ZNF507                                           | 0.0134108   | 0.621847505107191   | 0.0945666176831024 |
| cg19557518    | 17 | 60704641  | MRC2                                                    | 0.0223761   | 0.841470503230181   | 0.0945666176831024 |
| cg23599455    | 22 | 46409460  |                                                         | 0.0120827   | 0.644667416053761   | 0.0945666176831024 |
| cg12670845    | 19 | 12780457  | WDR83OS;WDR83OS;WDR83;WDR83;WDR83                       | 0.00195334  | 0.252345631413429   | 0.0945666176831024 |
| cg09032310    | 5  | 141262801 |                                                         | 0.0117416   | 0.387563594484108   | 0.0945900058693774 |
| cg22024692    | 17 | 80978417  | B3GNTL1                                                 | -0.0203176  | -0.0318279722251797 | 0.0945900058693774 |
| cg14165528    | 1  | 209539810 |                                                         | -0.0517037  | -0.0836689288239381 | 0.0945900058693774 |
| cg20798677    | 17 | 39968547  | FKBP10;SC65                                             | 0.037531    | 0.291725676009693   | 0.0947303431458132 |
| cg00923306    | 18 | 3230737   |                                                         | -0.0340238  | -0.0572145265857838 | 0.0947977641288323 |
| cg26968809    | 17 | 79895355  | PYCR1;PYCR1;PYCR1;PYCR1;PYCR1                           | 0.0251285   | 0.526733680126426   | 0.0947977641288323 |
| cg01335738    | 19 | 14019786  | CC2D1A                                                  | -0.0460789  | -0.0854620132723834 | 0.0947977641288323 |
| cg03953500    | 11 | 86383478  | ME3;ME3;ME3;ME3                                         | 0.00910308  | 0.498924446875469   | 0.0947977641288323 |
| cg13795627    | 1  | 157015873 | ARHGEF11;ARHGEF11                                       | 0.0402288   | 0.496531340097556   | 0.0947977641288323 |
| cg05918193    | 19 | 1556731   | MEX3D                                                   | -0.0250896  | -0.0388541016754008 | 0.0948242317977083 |
| cg25640822    | 5  | 134871645 | NEUROG1                                                 | 0.0209995   | 0.849963898999481   | 0.0948242317977083 |
| cg23599640    | 2  | 127864941 | BIN1;BIN1;BIN1;BIN1;BIN1;BIN1;BIN1;BIN1;BIN1            | 0.0155108   | 0.477034635155183   | 0.0948242317977083 |
| cg04451615    | 9  | 100991528 | MIR6854;TBC1D2;TBC1D2;TBC1D2                            | -0.028346   | -0.0434167058826763 | 0.0948242317977083 |
| cg05066164    | 1  | 228559156 | OBSN                                                    | -0.0282145  | -0.0454023299433766 | 0.0948242317977083 |
| cg26506507    | 8  | 23261738  | LOXL2                                                   | 0.0166457   | 0.425404859860009   | 0.0948242317977083 |
| cg08594547    | 4  | 178426921 |                                                         | -0.0185154  | -0.0280228032025033 | 0.0948242317977083 |
| cg08525989    | 20 | 32262282  | NECAB3;NECAB3                                           | 0.0185568   | 0.459617855348096   | 0.0948242317977083 |
| cg26473253    | 4  | 71768226  | MOB1B;MOB1B;MOB1B;MOB1B;MOB1B;MOB1B                     | 0.00839449  | 0.647358362643367   | 0.0948242317977083 |
| cg25849265    | 3  | 47205643  | SETD2                                                   | 0.0114366   | 0.66543479910009    | 0.0948242317977083 |
| cg11349556    | 18 | 7229672   | LRRC30                                                  | -0.0499434  | -0.108583529064577  | 0.0948242317977083 |
| cg02987163    | 17 | 35849291  | DUSP14                                                  | 0.011069    | 0.314278741302811   | 0.0948242317977083 |
| cg07367563    | 1  | 151032068 | CDC42SE1;CDC42SE1;CDC42SE1;MLL11;CDC42SE1               | 0.0164377   | 0.677263688546155   | 0.0948242317977083 |
| cg24648337    | 7  | 645588    | PRKAR1B;PRKAR1B;PRKAR1B;PRKAR1B;PRKAR1B;PRKAR1B         | -0.00820284 | -0.0121183969207652 | 0.0948242317977083 |
| cg26857141    | 3  | 127005632 |                                                         | -0.0376233  | -0.0646500682505825 | 0.0948242317977083 |
| cg19436929    | 3  | 149703360 |                                                         | -0.0101487  | -0.0151594287367157 | 0.0948242317977083 |
| cg27160460    | 11 | 66617512  | PC;PC;PC                                                | 0.0067943   | 0.0103301976641584  | 0.0948242317977083 |
| cg00959238    | 19 | 40749359  | AKT2;AKT2;AKT2                                          | -0.0144182  | -0.0216077131829228 | 0.0948242317977083 |
| cg08990514    | 17 | 48672483  | CACNA1G;CACNA1G;CACNA1G;CACNA1G;CACNA1G;CACNA1G;CACNA1G | -0.0321238  | -0.055910397434211  | 0.0948242317977083 |
| cg12703194    | 16 | 3086867   | CCDC64B                                                 | 0.0308526   | 0.410866677982351   | 0.0948242317977083 |
| cg11314818    | 3  | 128444915 | RAB7A                                                   | 0.00507422  | 0.373462888076042   | 0.0948242317977083 |
| cg11226148    | 2  | 27485298  | SLC30A3                                                 | 0.0177241   | 0.390313684239813   | 0.0948242317977083 |
| cg25183744    | 1  | 150552404 | MCL1;MCL1;MCL1                                          | 0.0108785   | 0.523402534631463   | 0.0948242317977083 |
| cg17643699    | 12 | 27091484  | FGFR1OP2;C12orf11;FGFR1OP2                              | 0.0258901   | 0.679822892035785   | 0.0948242317977083 |
| cg25872752    | 19 | 920370    | KISS1R                                                  | 0.0189442   | 0.59704880295871    | 0.0948242317977083 |
| cg16986746    | 3  | 48594219  | PFKFB4;PFKFB4                                           | 0.0144232   | 0.687744076782965   | 0.0948242317977083 |
| cg24218995    | 18 | 67873134  | RTTN                                                    | 0.0275502   | 0.835520507369783   | 0.0948242317977083 |
| cg24950082    | 16 | 30772857  | C16orf93;RNF40;RNF40;RNF40;RNF40;C16orf93               | 0.0187155   | 0.494988114344808   | 0.0948272254139414 |
| cg21202700    | 3  | 9799836   | CAMK1;OGG1;OGG1;OGG1;OGG1;OGG1                          | -0.0734474  | -0.173083138031517  | 0.0948272254139414 |
| cg24198848    | 16 | 16033611  |                                                         | -0.0458803  | -0.0740637283419783 | 0.0948272254139414 |
| cg12953445    | 16 | 87056872  |                                                         | -0.043891   | -0.0715123986000373 | 0.0948272254139414 |
| cg24751928    | 20 | 55964459  |                                                         | 0.0341133   | 0.537706820464356   | 0.0948272254139414 |
| cg17266780    | 9  | 793023    |                                                         | 0.00610891  | 0.00905705094216689 | 0.0948272254139414 |
| cg08114180    | 16 | 54319624  | IRX3                                                    | 0.0362529   | 0.502185623322346   | 0.0948272254139414 |
| cg13290673    | 2  | 159860200 | TANC1;TANC1                                             | -0.0109571  | -0.016277026967845  | 0.0948272254139414 |
| cg27134659    | 14 | 94640653  | PPP4R4;PPP4R4;PPP4R4;PPP4R4                             | 0.0238828   | 0.578320530648353   | 0.0948272254139414 |
| cg24907233    | 22 | 46545351  | PPARA;PPARA                                             | 0.0119992   | 0.519163644545767   | 0.0948272254139414 |
| cg19172750    | 17 | 66287499  | ARSG;SLC16A6                                            | 0.0115911   | 0.335467869303889   | 0.0948272254139414 |
| cg19336909    | 12 | 69438873  |                                                         | -0.0334008  | -0.0522807063280163 | 0.0948272254139414 |
| cg13384409    | 7  | 2414466   | EIF3B;EIF3B                                             | 0.00823772  | 0.0125018339295638  | 0.0948272254139414 |
| cg09061216    | 1  | 1558936   | MIB2;MIB2;MIB2;MIB2;MIB2                                | -0.0149595  | -0.0224669166656809 | 0.0948272254139414 |
| cg08529882    | 10 | 124902456 |                                                         | 0.0176121   | 0.302652243629615   | 0.0948272254139414 |
| cg13046107    | 9  | 6757544   | KDM4C;KDM4C;KDM4C;KDM4C;KDM4C;KDM4C                     | 0.0204845   | 0.740561773777761   | 0.0948272254139414 |
| ch.7.1628533R | 7  | 73938938  | GTF2IRD1;GTF2IRD1                                       | 0.0259484   | 0.412992001841926   | 0.0948272254139414 |
| cg12186917    | 21 | 35013231  | CRYZL1                                                  | -0.057182   | -0.105144610925613  | 0.0948272254139414 |
| cg03305840    | 8  | 143482468 | TSNARE1                                                 | -0.0258773  | -0.0398888689041576 | 0.0948272254139414 |
| cg06390411    | 17 | 66031805  | KPNA2                                                   | 0.0166886   | 0.756332730764225   | 0.0948272254139414 |
| cg14557714    | 9  | 90341385  | CTSL1;CTSL1                                             | 0.00438116  | 0.330686439081364   | 0.0948272254139414 |
| cg16692004    | 6  | 149639107 | TAB2;TAB2;TAB2;TAB2                                     | 0.0403602   | 0.323994200651012   | 0.0948272254139414 |
| cg22825944    | 16 | 68003289  | SLC12A4;SLC12A4;SLC12A4                                 | 0.00415349  | 0.457865722416109   | 0.0948272254139414 |
| cg03859893    | 10 | 60145150  | TFAM                                                    | 0.0121183   | 0.564798516051481   | 0.0948423492185707 |
| cg17510320    | 11 | 66360559  | CCS;CCDC87                                              | 0.0411664   | 0.280874998706766   | 0.0948423492185707 |
| cg16682175    | 10 | 70091200  | PBLD;PBLD;HNRNPH3;HNRNPH3                               | 0.00968959  | 0.479982073840663   | 0.0948423492185707 |
| cg02222496    | 17 | 10597147  | SCO1                                                    | -0.0394633  | -0.0627613110579855 | 0.0948423492185707 |
| cg04134803    | 5  | 150080579 | RBM22;RBM22                                             | 0.0113686   | 0.489746926389863   | 0.0948423492185707 |
| cg14534987    | 2  | 27341893  | CGREF1;CGREF1;CGREF1;CGREF1                             | 0.0640426   | 0.582858436453073   | 0.094870794030221  |
| cg24202119    | 5  | 35938692  | CAPSL;CAPSL;CAPSL                                       | -0.0309756  | -0.059437252622155  | 0.0949194343865873 |
| cg01989866    | 20 | 31017450  | ASXL1                                                   | 0.00396587  | 0.00592998100496294 | 0.0949470036671092 |
| cg04052337    | 9  | 136399924 | ADAMTSL2;ADAMTSL2                                       | 0.00354746  | 0.275116839513687   | 0.0949470036671092 |
| cg13306061    | 14 | 96555594  | C14orf132;C14orf132;C14orf132;C14orf132                 | 0.00609375  | 0.00910298282046019 | 0.0949470036671092 |
| cg25203425    | 2  | 121572108 | GLI2                                                    | -0.0377175  | -0.0671198019517124 | 0.0949470036671092 |
| cg05504606    | 19 | 1039871   | ABCA7                                                   | 0.0133814   | 0.574172983461649   | 0.0949470036671092 |
| cg06810179    | 16 | 90038862  | CENPBD1;AFG3L1;AFG3L1;CENPBD1;AFG3L1                    | 0.011256    | 0.466055713573436   | 0.0949470036671092 |

|            |    |           |                                            |             |                      |                     |
|------------|----|-----------|--------------------------------------------|-------------|----------------------|---------------------|
| cg22792161 | 9  | 5841794   |                                            | 0.0634121   | 0.245944220912892    | 0.0949470036671092  |
| cg12883204 | 12 | 75723847  | CAPS2                                      | 0.0103389   | 0.262285495640009    | 0.0949470036671092  |
| cg01464969 | 4  | 1768943   |                                            | 0.0581668   | 0.87343841870624     | 0.0949470036671092  |
| cg24209738 | 6  | 16303169  | ATXN1;ATXN1                                | -0.0129183  | -0.0195763040587279  | 0.0949470036671092  |
| cg23541365 | 11 | 85974795  | EED;EED                                    | -0.0342685  | -0.0539023146566355  | 0.0949470036671092  |
| cg17717259 | 7  | 29846259  |                                            | 0.0141186   | 0.510338232231248    | 0.0949470036671092  |
| cg04007241 | 1  | 179198680 | ABL2;ABL2;ABL2;ABL2;ABL2;ABL2;ABL2;ABL2    | 0.0194359   | 0.628106003804106    | 0.0949470036671092  |
| cg17336172 | 3  | 49377548  | USP4;USP4                                  | 0.00852018  | 0.55524899769679     | 0.0949470036671092  |
| cg24222746 | 2  | 148779348 | ORC4L;ORC4L;ORC4L                          | 0.0181852   | 0.520562624423264    | 0.0949470036671092  |
| cg07319961 | 6  | 166401460 | LINC00602;LINC00473;LINC00473              | 0.00614991  | 0.470783804021804    | 0.0949642750210622  |
| cg04281845 | 10 | 10215481  |                                            | -0.0726683  | -0.131007866754283   | 0.0949642750210622  |
| cg25338843 | 17 | 42441302  | FAM171A2                                   | 0.0924663   | 0.545036046624263    | 0.0949642750210622  |
| cg21274724 | 17 | 6386543   | PITPNM3;PITPNM3                            | -0.0785747  | -0.167035957826367   | 0.0949642750210622  |
| cg23576504 | 17 | 7298067   | PLSCR3;PLSCR3;PLSCR3;PLSCR3;TMEM256-PLSCR3 | 0.00624285  | 0.3509294271467      | 0.0949642750210622  |
| cg24567495 | 15 | 45814535  | SLC30A4;HMG2P46                            | 0.0221754   | 0.73354706676775     | 0.0949642750210622  |
| cg20577878 | 16 | 66914781  | PDP2                                       | 0.015606    | 0.730674540061282    | 0.0949642750210622  |
| cg16677488 | 16 | 57038246  |                                            | -0.0417253  | -0.0748978693722565  | 0.0949642750210622  |
| cg08908586 | 14 | 92414185  | FBLN5                                      | 0.00764207  | 0.664469420990118    | 0.0949642750210622  |
| cg23471890 | 12 | 111051874 | TCTN1;TCTN1;TCTN1                          | 0.00870847  | 0.365344008057624    | 0.09496474748246165 |
| cg13273243 | 4  | 169405039 |                                            | -0.0443949  | -0.0710609636739234  | 0.09496474748246165 |
| cg05116896 | 16 | 30366237  | CD2BP2;CD2BP2                              | 0.00803049  | 0.508298262240006    | 0.09496474748246165 |
| cg20739360 | 7  | 91833683  | KRIT1;KRIT1;KRIT1;KRIT1;KRIT1              | -0.0466591  | -0.0868749940245667  | 0.09496474748246165 |
| cg10573190 | 2  | 85843190  | USP39                                      | 0.00964721  | 0.478980402921342    | 0.09496474748246165 |
| cg17944110 | 1  | 10856657  | CASZ1;CASZ1;CASZ1;CASZ1                    | 0.0120608   | 0.569650129375637    | 0.09496474748246165 |
| cg25119654 | 11 | 67085309  | LOC100130987                               | 0.0176685   | 0.640569269431914    | 0.09496474748246165 |
| cg11089232 | 9  | 68998480  |                                            | -0.0746314  | -0.201233507684642   | 0.094983354778471   |
| cg02896403 | 1  | 155231989 | SCAMP3;SCAMP3;SCAMP3;SCAMP3                | 0.00761706  | 0.404510978838306    | 0.0950002499029479  |
| cg14587604 | 5  | 158758756 | IL12B                                      | 0.0140118   | 0.877758166052167    | 0.0950002499029479  |
| cg27498669 | 20 | 32262017  | NECAB3;NECAB3                              | 0.0128418   | 0.372549656548997    | 0.0950183277978001  |
| cg13842154 | 14 | 103390247 | AMN                                        | 0.0140281   | 0.274379554933786    | 0.0950183277978001  |
| cg05222995 | 12 | 115124973 |                                            | 0.0206373   | 0.441197789913517    | 0.0950183277978001  |
| cg19419789 | 16 | 2255584   | MLST8;MLST8;MLST8;MLST8                    | 0.0224176   | 0.605138661041434    | 0.0950183277978001  |
| cg24500832 | 12 | 54394212  | HOXC9                                      | 0.00573856  | 0.324836758574496    | 0.0950183277978001  |
| cg11686792 | 13 | 114876061 | RASA3                                      | 0.0162138   | 0.511300095785298    | 0.0950183277978001  |
| cg18354686 | 16 | 4897378   | UBN1;GLYR1                                 | 0.00916053  | 0.57715763720472     | 0.0950183277978001  |
| cg03927520 | 2  | 220110237 | GLB1L;GLB1L;STK16;STK16;STK16              | 0.0540082   | 0.745502235712453    | 0.0950183277978001  |
| cg02820958 | 19 | 7099040   |                                            | 0.0697714   | 0.459316459515737    | 0.0950183277978001  |
| cg05166499 | 8  | 133493008 | KCNQ3                                      | 0.0128095   | 0.496927830046857    | 0.0950183277978001  |
| cg18789663 | 1  | 242688591 | PLD5                                       | 0.029233    | 0.809807533071022    | 0.0950183277978001  |
| cg09182900 | 6  | 43909955  |                                            | 0.00727403  | 0.0109334333622453   | 0.0950183277978001  |
| cg17986684 | 1  | 228674167 | RNF187                                     | 0.0150433   | 0.290832481298557    | 0.0950183277978001  |
| cg09864858 | 1  | 65613311  | AK3L1;AK3L1;AK3L1;AK3L1                    | 0.0174386   | 0.479960030838375    | 0.0950183277978001  |
| cg13102235 | 1  | 236203522 | NID1                                       | -0.0266619  | -0.0417829697916978  | 0.0950183277978001  |
| cg18278714 | 2  | 127752644 |                                            | -0.00660664 | -0.00970186618252459 | 0.0950183277978001  |
| cg04936382 | 20 | 36662003  | RPRD1B;KIAA0406;RPRD1B                     | 0.0249972   | 0.785771558067763    | 0.0950183277978001  |
| cg05020775 | 20 | 1246934   | SNPH                                       | 0.0407951   | 0.415214038392403    | 0.0950183277978001  |
| cg06655143 | 8  | 144499638 | MAFA-AS1                                   | 0.00391207  | 0.00587806564145406  | 0.0950183277978001  |
| cg04965365 | 9  | 108487768 | TMEM38B                                    | -0.0259682  | -0.0411943298570594  | 0.0950183277978001  |
| cg19100138 | 3  | 183993995 | ECE2;ECE2;ECE2;ECE2                        | 0.0244181   | 0.565017722600119    | 0.0950183277978001  |
| cg06089712 | 14 | 35343862  | BAZ1A;BAZ1A                                | 0.00722129  | 0.535603631946742    | 0.0950183277978001  |
| cg25523538 | 10 | 28031957  | MKX                                        | 0.0135634   | 0.583674321364433    | 0.0950183277978001  |
| cg16450103 | 17 | 41174539  | VAT1                                       | 0.00724396  | 0.509182948065978    | 0.0950183277978001  |
| cg23288521 | 20 | 37075451  | SNORA39;SNHG11                             | 0.0120747   | 0.473618319610704    | 0.0950183277978001  |
| cg08888178 | 19 | 344981    | MIER2                                      | 0.025388    | 0.500033963484174    | 0.0950183277978001  |
| cg23084309 | 19 | 6280164   | MLL1                                       | 0.0437262   | 0.230172647588392    | 0.0950183277978001  |
| cg07004372 | 3  | 57386380  | DNAH12                                     | -0.073586   | -0.144809265875581   | 0.0950183277978001  |
| cg21803245 | 14 | 105331124 | KIAA0284;KIAA0284                          | 0.0429869   | 0.584711597462825    | 0.0950183277978001  |
| cg08478189 | 2  | 208030666 | KLF7                                       | 0.00750164  | 0.258726884242325    | 0.0950183277978001  |
| cg24448859 | 4  | 174255105 | HMGB2;HMGB2;HMGB2                          | 0.0270651   | 0.746810692531146    | 0.0950183277978001  |
| cg18249149 | 2  | 128785194 | SAP130;SAP130                              | 0.0188855   | 0.678629488577855    | 0.0950183277978001  |
| cg25447359 | 22 | 30790057  |                                            | -0.0593296  | -0.122078590908167   | 0.0950183277978001  |
| cg08497901 | 1  | 45472676  | HECTD3;HECTD3                              | 0.00971126  | 0.0146375802386213   | 0.0950183277978001  |
| cg17843125 | 1  | 100598159 | SASS6;CCDC76                               | 0.0207402   | 0.300258639827096    | 0.0950183277978001  |
| cg12187069 | 19 | 41082589  | SHKBP1                                     | 0.0121276   | 0.699173559030092    | 0.0950183277978001  |
| cg01686044 | 19 | 45754802  | MARK4                                      | 0.0165834   | 0.446544660620868    | 0.0950183277978001  |
| cg01803835 | 8  | 55223410  |                                            | -0.0400185  | -0.0663343372284033  | 0.0950183277978001  |
| cg19273746 | 6  | 71666063  | B3GAT2                                     | 0.0540787   | 0.635764475675962    | 0.0950183277978001  |
| cg24577940 | 12 | 106469246 | NUAK1                                      | -0.0341586  | -0.0550813073449949  | 0.0950183277978001  |
| cg23097985 | 8  | 22552961  |                                            | 0.0140304   | 0.917819978531452    | 0.0950183277978001  |
| cg19001554 | 5  | 31527598  | DROSHA;DROSHA                              | -0.0568429  | -0.0973390471692885  | 0.0950183277978001  |
| cg15739955 | 19 | 14183651  | LOC113230                                  | 0.00577313  | 0.46600260879792     | 0.0950183277978001  |
| cg15203270 | 4  | 77636913  | SHROOM3                                    | -0.0441187  | -0.0737089880154956  | 0.0950183277978001  |
| cg00099976 | 13 | 26625273  | SHISA2                                     | 0.0389396   | 0.309784525365142    | 0.0950183277978001  |
| cg00973947 | 3  | 143692255 | C3orf58;C3orf58;C3orf58                    | 0.0298823   | 0.652663719298241    | 0.0950183277978001  |
| cg11555640 | 21 | 40754783  | WRB                                        | -0.0353531  | -0.0569141832607637  | 0.0950183277978001  |
| cg06770993 | 3  | 49158462  | USP19                                      | 0.0267783   | 0.903084099480991    | 0.0950183277978001  |
| cg00492003 | 15 | 78572760  | DNAJA4;DNAJA4;DNAJA4                       | -0.0233572  | -0.036440437142432   | 0.0950183277978001  |
| cg08089031 | 6  | 139456240 | HECA                                       | 0.0237958   | 0.713534819186147    | 0.0950183277978001  |
| cg26036478 | 4  | 124319962 | SPRY1;SPRY1                                | 0.0104229   | 0.540126318265438    | 0.0950183277978001  |
| cg15100599 | 1  | 223538174 | SUSD4;SUSD4                                | 0.0327904   | 0.745757689870319    | 0.0950183277978001  |
| cg26711517 | 10 | 131909267 | LINC00959                                  | 0.00694865  | 0.531961115838112    | 0.0950183277978001  |
| cg17452291 | 7  | 86781755  | DMTF1;DMTF1;DMTF1;DMTF1;DMTF1;DMTF1        | 0.0207001   | 0.527666394543655    | 0.0950183277978001  |



|             |    |           |                                                                                                                                         |             |                     |                    |
|-------------|----|-----------|-----------------------------------------------------------------------------------------------------------------------------------------|-------------|---------------------|--------------------|
| cg02126603  | 17 | 79455239  |                                                                                                                                         | 0.0154997   | 0.764420167931768   | 0.0950183277978001 |
| cg25037274  | 7  | 29872894  | WIPF3                                                                                                                                   | -0.06794    | -0.124335836481196  | 0.0950183277978001 |
| cg05237820  | 20 | 39945987  |                                                                                                                                         | 0.00802232  | 0.294485277225959   | 0.0950183277978001 |
| cg25512587  | 9  | 136344026 | SLC2A6;SLC2A6                                                                                                                           | 0.0112377   | 0.323281442868116   | 0.0950183277978001 |
| cg13388111  | 11 | 61062665  | VWCE;VWCE                                                                                                                               | 0.0184524   | 0.835958500283704   | 0.0950183277978001 |
| cg04099264  | 1  | 44435507  | DPH2;DPH2                                                                                                                               | 0.00841446  | 0.434452002648708   | 0.0950183277978001 |
| cg12095968  | 1  | 151739679 | OAZ3;OAZ3                                                                                                                               | -0.0391164  | -0.064995320273144  | 0.0950183277978001 |
| cg27219662  | 6  | 28891728  | TRIM27;TRIM27                                                                                                                           | 0.0318771   | 0.689797571559281   | 0.0950183277978001 |
| cg22818988  | 3  | 3168509   | TRNT1                                                                                                                                   | 0.00385849  | 0.404722973152917   | 0.0950183277978001 |
| cg16459120  | 4  | 81189164  | FGF5;FGF5;FGF5                                                                                                                          | -0.0338725  | -0.277321305236348  | 0.0950183277978001 |
| cg03654430  | 10 | 91174411  | IFIT5;IFIT5                                                                                                                             | 0.010713    | 0.524534110157572   | 0.0950183277978001 |
| cg01037895  | 1  | 21877781  | ALPL;ALPL                                                                                                                               | -0.0442948  | -0.0796879318459848 | 0.0950183277978001 |
| cg22377913  | 1  | 26758610  | DHDDS;DHDDS                                                                                                                             | 0.00640594  | 0.376578766004739   | 0.0950183277978001 |
| cg10141938  | 7  | 26240087  | HNRNPA2B1;HNRNPA2B1;CBX3;CBX3                                                                                                           | 0.00667488  | 0.439397503208481   | 0.0950183277978001 |
| cg00663077  | 4  | 188916709 | ZFP42                                                                                                                                   | 0.0500775   | 0.663035156306368   | 0.0950183277978001 |
| cg06688733  | 5  | 42813842  |                                                                                                                                         | -0.0162398  | -0.0246463583096094 | 0.0950183277978001 |
| cg10241347  | 10 | 124639260 | LOC399815;FAM24B                                                                                                                        | 0.0830722   | 1.405495849072      | 0.0950183277978001 |
| cg17526727  | 6  | 43791674  |                                                                                                                                         | -0.0605544  | -0.121211502253473  | 0.0950183277978001 |
| cg16589580  | 22 | 30239152  |                                                                                                                                         | -0.0153895  | -0.0233049648258374 | 0.0950183277978001 |
| cg16004435  | 8  | 38749768  |                                                                                                                                         | -0.0134957  | -0.0203274325350824 | 0.0950183277978001 |
| cg00902415  | 17 | 41174425  | VAT1;VAT1                                                                                                                               | 0.00926275  | 0.341965644153144   | 0.0950183277978001 |
| cg20628663  | 10 | 43360327  |                                                                                                                                         | 0.035463    | 0.144774719333567   | 0.0950183277978001 |
| cg27324859  | 19 | 17398922  |                                                                                                                                         | -0.00970893 | -0.0144041023725973 | 0.0950183277978001 |
| cg20567721  | 16 | 81040639  | CENPN;CENPN;CENPN;CENPN;CENPN;CENPN;C16orf61                                                                                            | 0.0114704   | 0.710295547241124   | 0.0950183277978001 |
| cg03414474  | 2  | 105488932 |                                                                                                                                         | 0.00985504  | 0.525228188208789   | 0.0950183277978001 |
| cg26797585  | 19 | 3585609   | GIPC3                                                                                                                                   | 0.0226762   | 0.761096706008042   | 0.0950183277978001 |
| cg17144508  | 2  | 128283727 | IWS1                                                                                                                                    | 0.0269546   | 0.707846380157785   | 0.0950183277978001 |
| cg15082212  | 12 | 124068903 | TMED2                                                                                                                                   | 0.00585046  | 0.399717183690086   | 0.0950183277978001 |
| cg18273700  | 3  | 47319063  | KIF9;KIF9;KIF9                                                                                                                          | 0.0117245   | 0.018087039440486   | 0.0950183277978001 |
| cg18390181  | 10 | 102810139 |                                                                                                                                         | 0.00937131  | 0.399752570631649   | 0.0950183277978001 |
| cg14621103  | 7  | 1178041   | C7orf50;C7orf50;C7orf50                                                                                                                 | 0.00948624  | 0.626506134317444   | 0.0950183277978001 |
| cg14279539  | 20 | 49998378  |                                                                                                                                         | -0.0742186  | -0.170337219113569  | 0.0950183277978001 |
| cg05014952  | 14 | 35873130  | NFKBIA                                                                                                                                  | 0.0282713   | 0.789391039650904   | 0.0950183277978001 |
| cg15650240  | 1  | 15736650  | EFHD2                                                                                                                                   | 0.0366648   | 0.493830714469832   | 0.0950183277978001 |
| cg20936291  | 9  | 130679328 | ST6GALNAC4;ST6GALNAC4                                                                                                                   | 0.0297882   | 0.36292254697159    | 0.0950183277978001 |
| cg07682083  | 14 | 73957524  | HEATR4;C14orf169                                                                                                                        | 0.0103513   | 0.544890440515002   | 0.095017699625633  |
| cg11562028  | 5  | 150911153 | FAT2                                                                                                                                    | -0.0119373  | -0.0188138192174902 | 0.095053273247236  |
| cg20947082  | 1  | 233749643 | KCNK1                                                                                                                                   | 0.0646044   | 1.06922808378946    | 0.095053273247236  |
| cg27607338  | 3  | 119041955 | CDGAP                                                                                                                                   | 0.0117852   | 0.407698481613085   | 0.095053273247236  |
| cg16232013  | 11 | 63952725  | STIP1;STIP1;STIP1                                                                                                                       | 0.0270395   | 0.733115391410683   | 0.095082803888212  |
| cg21975007  | 6  | 132128965 | ENPP1                                                                                                                                   | 0.030452    | 1.00361164875414    | 0.0951010438574133 |
| cg25975435  | 8  | 127489179 |                                                                                                                                         | -0.0249372  | -0.0388817328662632 | 0.0951010438574133 |
| cg025056827 | 5  | 68711277  | MARVELD2;MARVELD2                                                                                                                       | 0.0395177   | 0.534451884314287   | 0.0951010438574133 |
| cg20012885  | 18 | 12377404  | AFG3L2                                                                                                                                  | 0.0329553   | 0.298675965432123   | 0.0951010438574133 |
| cg10670553  | 4  | 65264573  | TECLL                                                                                                                                   | -0.0422602  | -0.0662903558030511 | 0.0951310105464896 |
| cg05762700  | 4  | 18023779  | LCORL;LCORL                                                                                                                             | 0.0499882   | 1.04421006596846    | 0.0951310105464896 |
| cg00372297  | 17 | 27139635  | FAM222B;FAM222B;FAM222B;FAM222B;FAM222B;FAM222B;FAM222B;FAM222B;FAM222B;FAM222B;FAM222B;FAM222B;FAM222B;FAM222B;FAM222B;FAM222B;FAM222B | 0.0134664   | 0.5751808627967     | 0.0951310105464896 |
| cg07694872  | 9  | 132048856 |                                                                                                                                         | 0.00799767  | 0.0120061079310287  | 0.0951310105464896 |
| cg14760438  | 6  | 33409448  | SYNGAP1                                                                                                                                 | -0.0289456  | -0.0461698096533926 | 0.0951310105464896 |
| cg21234853  | 2  | 198318200 | COQ10B                                                                                                                                  | 0.0103133   | 0.379953493928629   | 0.0951330787454335 |
| cg19700341  | 17 | 72857076  | GRIN2C                                                                                                                                  | 0.0476605   | 0.547578233081002   | 0.0951641667523737 |
| cg01287079  | 6  | 108888941 | FOXO3;FOXO3                                                                                                                             | -0.0269668  | -0.0435773155072615 | 0.0951778856087981 |
| cg02878891  | 2  | 102090444 | RFX8                                                                                                                                    | 0.0123871   | 0.36245307315968    | 0.0951778856087981 |
| cg05100916  | 7  | 112090586 | IFRD1;IFRD1;IFRD1                                                                                                                       | 0.0151507   | 0.466315141575755   | 0.0951778856087981 |
| cg08533424  | 17 | 37009973  | RPL23;SNORA21;RPL23                                                                                                                     | 0.00614482  | 0.506850207627069   | 0.0951778856087981 |
| cg22868034  | 19 | 49092375  | SULT2B1;SULT2B1                                                                                                                         | 0.0438337   | 0.55804454857265    | 0.0951778856087981 |
| cg08227526  | 4  | 155663529 |                                                                                                                                         | 0.0112475   | 0.336221304261956   | 0.0951778856087981 |
| cg14550910  | 10 | 54216510  |                                                                                                                                         | -0.0625541  | -0.11277199281924   | 0.0952824731679905 |
| cg25837984  | 3  | 167372481 | WDR49                                                                                                                                   | -0.0342569  | -0.0601901293358314 | 0.0953506022636338 |
| cg22610533  | 12 | 64238379  | SRGAP1                                                                                                                                  | 0.0242338   | 0.863346080971979   | 0.0953506022636338 |
| cg00590851  | 13 | 27335089  | GPR12                                                                                                                                   | 0.0232774   | 0.518686150858743   | 0.0953506022636338 |
| cg11896345  | 17 | 1532217   | SLC43A2                                                                                                                                 | 0.017078    | 0.778549824415653   | 0.0953506022636338 |
| cg23248351  | 8  | 108511700 | ANGPT1                                                                                                                                  | -0.017291   | -0.026154479950358  | 0.095369324654778  |
| cg18035158  | 6  | 107810971 | SOBP                                                                                                                                    | 0.026732    | 0.599918642254283   | 0.0954048686304252 |
| cg11838475  | 2  | 241556683 | CAPN10                                                                                                                                  | -0.0130246  | -0.0197830201492203 | 0.0954048686304252 |
| cg14204211  | 10 | 81107088  | PPIF                                                                                                                                    | 0.0166125   | 0.597493241395508   | 0.0954048686304252 |
| cg00723044  | 14 | 71276570  | MAP3K9                                                                                                                                  | 0.00796615  | 0.621867458387948   | 0.0954048686304252 |
| cg10037754  | 15 | 45563114  | LOC101928414;SLC28A2                                                                                                                    | -0.0563736  | -0.0949506552900264 | 0.0954048686304252 |
| cg04540836  | 8  | 123854227 | ZHX2                                                                                                                                    | 0.00751737  | 0.011130332053754   | 0.0954048686304252 |
| cg24106894  | 15 | 48623432  | DUT;DUT;DUT                                                                                                                             | 0.0143691   | 0.825248902682071   | 0.0954048686304252 |
| cg00362614  | 1  | 28052155  | FAM76A;FAM76A;FAM76A;FAM76A;FAM76A;FAM76A                                                                                               | 0.0213832   | 0.983227341273231   | 0.0954048686304252 |
| cg11169461  | 2  | 224904347 | SERPINE2;SERPINE2;SERPINE2                                                                                                              | 0.00454145  | 0.359978878422546   | 0.0954145134085853 |
| cg04117643  | 17 | 7476796   | EIF4A1;SNORA48                                                                                                                          | 0.0141004   | 0.309562812632341   | 0.0954252389144774 |
| cg05301181  | 10 | 35379533  | CUL2                                                                                                                                    | 0.00662931  | 0.328687961149588   | 0.0954252389144774 |
| cg03543731  | 15 | 50474621  | SLC27A2;SLC27A2;SLC27A2;SLC27A2                                                                                                         | 0.00689344  | 0.44091392900428    | 0.0954252389144774 |
| cg04944802  | 1  | 228603769 | TRIM17;TRIM17;TRIM17                                                                                                                    | 0.0139105   | 0.462085050300827   | 0.0954252389144774 |
| cg03727373  | 11 | 1404502   |                                                                                                                                         | 0.0458955   | 0.748695450106384   | 0.0954252389144774 |
| cg19968692  | 13 | 73301900  | C13orf37;C13orf34;C13orf37                                                                                                              | 0.0145      | 0.821056527644555   | 0.0954252389144774 |
| cg06464369  | 5  | 1005292   |                                                                                                                                         | 0.0332049   | 0.614673197075693   | 0.0954252389144774 |
| cg01497487  | 22 | 38141814  | TRIOBP;TRIOBP;TRIOBP                                                                                                                    | 0.025358    | 0.459930497381207   | 0.0954252389144774 |
| cg01023787  | 5  | 1243714   | SLC6A18                                                                                                                                 | 0.0140453   | 0.0222452356767433  | 0.0954252389144774 |
| cg09460159  | 17 | 30771470  | PSMD11                                                                                                                                  | 0.0116759   | 0.463721272981234   | 0.0954252389144774 |

|            |    |           |                                                  |             |                     |                    |
|------------|----|-----------|--------------------------------------------------|-------------|---------------------|--------------------|
| cg14132868 | 11 | 18343680  | HPS5;HPS5;HPS5;HPS5;HPS5;HPS5;GTF2H1;GTF2H1      | 0.0171097   | 0.740262389213655   | 0.0954252389144774 |
| cg16464704 | 1  | 26249489  |                                                  | 0.0217192   | 0.396916017267465   | 0.0954252389144774 |
| cg13372927 | 11 | 111896293 | DLAT                                             | 0.0314986   | 0.974915761163555   | 0.0954252389144774 |
| cg22706629 | 15 | 65823539  | PTPLAD1                                          | 0.0263998   | 0.596256320067036   | 0.0954252389144774 |
| cg08072480 | 11 | 65292666  | SCYL1;SCYL1                                      | 0.0141482   | 1.02176355528883    | 0.0954252389144774 |
| cg02414034 | 17 | 5185283   | RABEP1;RABEP1                                    | 0.0214545   | 0.759006769665077   | 0.0954252389144774 |
| cg00485681 | 9  | 124990761 | LHX6;LHX6;LHX6;LHX6                              | 0.0118073   | 0.261838911599401   | 0.0954252389144774 |
| cg06737004 | 16 | 31226760  | TRIM72                                           | 0.0187964   | 0.647743846281717   | 0.0954252389144774 |
| cg13300098 | 9  | 33036573  | DNAJA1;DNAJA1                                    | -0.0659726  | -0.106318784645194  | 0.0954252389144774 |
| cg09039436 | 11 | 46369515  | DGKZ;DGKZ;DGKZ                                   | 0.0132786   | 0.582668572383042   | 0.0954252389144774 |
| cg14022434 | 10 | 123687714 | ATE1;ATE1                                        | 0.00824662  | 0.383503196550631   | 0.0954252389144774 |
| cg20673919 | 11 | 125702313 | PATE4                                            | -0.0754426  | -0.22755627829196   | 0.0954252389144774 |
| cg21869055 | 19 | 51522454  | KLK10;KLK10;KLK10                                | 0.0170838   | 0.331000675978514   | 0.0954252389144774 |
| cg26884276 | 5  | 139554806 | C5orf32;C5orf32                                  | 0.020192    | 0.97711144159788    | 0.0954252389144774 |
| cg09980176 | 19 | 11532175  | CCDC151                                          | 0.0311419   | 0.586944867842283   | 0.0954252389144774 |
| cg11598954 | 11 | 44086756  | ACCS;ACCS                                        | -0.0346361  | -0.0550982440922402 | 0.0954252389144774 |
| cg0265925  | 14 | 39938424  |                                                  | -0.0489933  | -0.0898285931911581 | 0.0954252389144774 |
| cg22972965 | 17 | 7772650   |                                                  | 0.00817606  | 0.301950873439633   | 0.0954252389144774 |
| cg08388245 | 3  | 50171724  |                                                  | -0.0241465  | -0.0370383973144767 | 0.0954252389144774 |
| cg09816342 | 1  | 42318574  | HIVEP3;HIVEP3;HIVEP3;HIVEP3                      | -0.00730774 | -0.0108871481752756 | 0.0954252389144774 |
| cg05040338 | 16 | 89270802  |                                                  | -0.064138   | -0.11373553173976   | 0.0954252389144774 |
| cg21429500 | 4  | 17579272  | LAP3                                             | 0.00747944  | 0.428293351734547   | 0.0954252389144774 |
| cg09933638 | 3  | 128444901 | RAB7A                                            | 0.00539827  | 0.321847509788029   | 0.0954257306869682 |
| cg17369438 | 1  | 36184635  | C1orf216;C1orf216                                | 0.0234919   | 0.898380176175597   | 0.0954384599300855 |
| cg25004838 | 6  | 32112189  |                                                  | 0.0265924   | 0.0467893656402074  | 0.0954835620559887 |
| cg21324037 | 12 | 132674606 |                                                  | 0.00749712  | 0.640553266858248   | 0.0954835620559887 |
| cg08329655 | 11 | 7534677   | PPFIBP2                                          | 0.016044    | 0.68208411709638    | 0.0954835620559887 |
| cg04726800 | 3  | 128598191 | ACAD9                                            | 0.0116493   | 0.5438396597469     | 0.0954835620559887 |
| cg14292314 | 19 | 28293235  |                                                  | -0.0266796  | -0.0468639938748661 | 0.0954835620559887 |
| cg14672709 | 17 | 48133110  | ITGA3;ITGA3                                      | 0.00360314  | 0.303021881812395   | 0.0954864999993396 |
| cg00125159 | 1  | 228290140 | C1orf35                                          | 0.045642    | 1.5401932834872     | 0.0954864999993396 |
| cg18485839 | 19 | 58378654  |                                                  | -0.034897   | -0.0562771684994835 | 0.0954864999993396 |
| cg24592391 | 11 | 102653026 | WTAPP1                                           | -0.0396363  | -0.0635297680968842 | 0.0954864999993396 |
| cg07703976 | 7  | 48494734  | ABCA13                                           | 0.0449567   | 0.0689510570681153  | 0.0954864999993396 |
| cg19721541 | 8  | 18027367  | NAT1                                             | -0.0555049  | -0.106332436962695  | 0.0954864999993396 |
| cg18519694 | 11 | 118307647 | MLL                                              | 0.0227965   | 0.551234342963992   | 0.0954864999993396 |
| cg04446983 | 6  | 20530262  |                                                  | -0.0568989  | -0.0954768862024246 | 0.0954864999993396 |
| cg00680572 | 14 | 37050691  | NKX2-8                                           | 0.0354899   | 0.536724074624231   | 0.0954864999993396 |
| cg18633432 | 3  | 135915556 | MSL2                                             | 0.0169675   | 0.892626495703535   | 0.0954864999993396 |
| cg02257300 | 19 | 45873380  | ERCC2;ERCC2                                      | 0.00517108  | 0.337621414833329   | 0.0954864999993396 |
| cg02703787 | 15 | 93256789  |                                                  | -0.0459311  | -0.130760950579643  | 0.0954864999993396 |
| cg16666935 | 13 | 31736119  | HSPH1                                            | 0.0192633   | 0.415729586371867   | 0.0954864999993396 |
| cg00093058 | 16 | 717932    | RHOT2                                            | 0.0103345   | 0.572549714725399   | 0.0954864999993396 |
| cg10186461 | 3  | 107656904 |                                                  | -0.012596   | -0.019139856897852  | 0.0954864999993396 |
| cg06211164 | 3  | 50359065  | HYAL2;HYAL2                                      | 0.0125709   | 0.425111402801373   | 0.0954864999993396 |
| cg10143122 | 4  | 147194482 | SLC10A7;SLC10A7                                  | 0.0258913   | 0.0405788475119648  | 0.0954864999993396 |
| cg05968010 | 1  | 210000883 | C1orf107                                         | 0.0634474   | 0.38042865168091    | 0.0955110095310495 |
| cg03022556 | 1  | 162335234 | NOS1AP;NOS1AP;NOS1AP                             | 0.00804234  | 0.0120358599947891  | 0.0955110095310495 |
| cg06918551 | 6  | 166356928 | LINC00473;LINC00473                              | -0.0223783  | -0.034038259049572  | 0.0955110095310495 |
| cg25600562 | 9  | 98271449  | PTCH1;PTCH1;PTCH1;PTCH1                          | 0.0131108   | 0.537395342086927   | 0.0955110095310495 |
| cg10008636 | 14 | 103542242 |                                                  | 0.0151105   | 0.518757731076409   | 0.0955110095310495 |
| cg08987887 | 6  | 76311629  | SEN6;SEN6;SEN6;SEN6;SEN6;SEN6                    | 0.0104595   | 0.640835915802788   | 0.0955110095310495 |
| cg08224208 | 19 | 15218165  | SYDE1                                            | 0.0305838   | 0.481844026441054   | 0.0955110095310495 |
| cg19510699 | 20 | 1297651   | SDCBP2                                           | -0.112209   | -0.308657918140101  | 0.0955268073836805 |
| cg24141233 | 1  | 212781895 | ATF3;ATF3;ATF3                                   | 0.0314778   | 0.883153403814401   | 0.0955268073836805 |
| cg20873420 | 2  | 208634917 | FZD5                                             | 0.0159449   | 0.52845667862048    | 0.0955268073836805 |
| cg13563284 | 20 | 21082335  |                                                  | 0.0164185   | 0.566127619597529   | 0.0955504542920542 |
| cg21412928 | 6  | 30640498  | DHX16;DHX16                                      | 0.0408485   | 0.894855928357725   | 0.0955507338740581 |
| cg27344330 | 19 | 17530716  | MVB12A;MVB12A;MVB12A                             | 0.0318293   | 1.18208391462404    | 0.0955506383551256 |
| cg27211204 | 15 | 99791508  | LRRC28                                           | 0.0176224   | 0.665147810350936   | 0.0956094217265247 |
| cg15355400 | 16 | 24857426  | SLC5A11;SLC5A11;SLC5A11;SLC5A11                  | 0.0147722   | 0.0233714848172026  | 0.0956160226674209 |
| cg03509991 | 1  | 46050221  | NASP;NASP;NASP                                   | 0.00524055  | 0.40919473830501    | 0.0956270677270513 |
| cg16437766 | 4  | 39529126  | UGDH;UGDH;UGDH-AS1;UGDH;UGDH;UGDH;MIR1273H       | 0.00548007  | 0.395991808330334   | 0.0956270677270513 |
| cg26990633 | 3  | 44665441  | ZNF197;ZNF197;ZNF197-AS1                         | -0.0945084  | -0.20450901850429   | 0.0957091619425686 |
| cg25776635 | 12 | 122231757 | RHOF                                             | 0.021034    | 0.487915517106921   | 0.0957165397259027 |
| cg09063944 | 1  | 3688921   | LOC388588                                        | 0.00607019  | 0.430092595733813   | 0.0957351107314399 |
| cg06421707 | 20 | 25228305  | PYGB                                             | 0.00825043  | 0.573735388724267   | 0.095742807938221  |
| cg10534439 | 2  | 69969029  | ANXA4                                            | 0.0432194   | 0.453192720797326   | 0.095742807938221  |
| cg03546183 | 11 | 128584167 | FLI1;FLI1;FLI1;FLI1                              | 0.0301771   | 0.0495094084088655  | 0.095742807938221  |
| cg15744534 | 15 | 70388889  | TLE3;TLE3;TLE3;TLE3;TLE3                         | 0.0267982   | 0.358655794238352   | 0.0957580638353478 |
| cg25984249 | 6  | 31509765  | BAT1;BAT1;SNORD84;BAT1;BAT1                      | 0.0371877   | 0.28068091504786    | 0.0957580638353478 |
| cg26163463 | 5  | 139926773 | EIF4EBP3;ANKHD1-EIF4EBP3                         | -0.0692191  | -0.160486219524752  | 0.0957580638353478 |
| cg23724858 | 6  | 32055711  | TNXB                                             | 0.0137926   | 0.680263384691115   | 0.0957580638353478 |
| cg24603408 | 8  | 22562397  |                                                  | 0.0228119   | 0.267439356916834   | 0.0957580638353478 |
| cg20729301 | 2  | 233368115 |                                                  | 0.00617141  | 0.761208701325704   | 0.0957580638353478 |
| cg21895364 | 7  | 150767428 | SLC4A2;SLC4A2;SLC4A2;SLC4A2;SLC4A2;SLC4A2;SLC4A2 | 0.0128756   | 0.0199000109725248  | 0.0957580638353478 |
| cg21710066 | 6  | 474967    |                                                  | 0.0234274   | 0.532497444640357   | 0.0957617831138547 |
| cg01356910 | 16 | 4323571   | TFAP4                                            | 0.0708597   | 1.10894434193932    | 0.0957617831138547 |
| cg26270411 | 20 | 43514327  | YWHAH;YWHAH                                      | 0.0150756   | 0.488463134883789   | 0.0957815322303836 |
| cg01644723 | 8  | 146228246 | ZNF252;C8orf77                                   | 0.00685306  | 0.58495902285718    | 0.0958062771130654 |
| cg26200974 | 10 | 124383677 | DMBT1;DMBT1;DMBT1                                | 0.0196462   | 0.0313797983236131  | 0.0958082651067595 |
| cg24007917 | 12 | 77272927  | CSRFP2                                           | 0.0117651   | 0.411667654370373   | 0.0958082651067595 |

|            |    |           |                                                                                            |             |                     |                    |
|------------|----|-----------|--------------------------------------------------------------------------------------------|-------------|---------------------|--------------------|
| cg08254315 | 8  | 25593585  |                                                                                            | -0.0399467  | -0.0662505255741801 | 0.0958082651067595 |
| cg08646105 | 13 | 32417270  |                                                                                            | -0.0704279  | -0.129229752717816  | 0.0958180925850529 |
| cg02073511 | 16 | 3550924   | CLUAP1                                                                                     | 0.0477755   | 0.359490972970146   | 0.0958180925850529 |
| cg19937493 | 1  | 27722051  | GPR3                                                                                       | 0.00518868  | 0.375491119646639   | 0.0958180925850529 |
| cg09999876 | 14 | 24521843  | LRRRC16B                                                                                   | 0.007621    | 0.462553225252996   | 0.0958180925850529 |
| cg05112574 | 17 | 76374542  | PGS1                                                                                       | 0.00868565  | 0.450874399323036   | 0.095825285715459  |
| cg11666559 | 1  | 221067662 |                                                                                            | 0.0130011   | 0.288387112892645   | 0.095825285715459  |
| cg16301728 | 2  | 187717549 |                                                                                            | -0.0465092  | -0.0958590061323111 | 0.095825285715459  |
| cg04328477 | 16 | 68270258  | ESRP2                                                                                      | 0.0458061   | 0.758829853837869   | 0.095825285715459  |
| cg02688760 | 1  | 182573731 | RGS16                                                                                      | 0.0165242   | 0.501892611741915   | 0.095825285715459  |
| cg05456948 | 10 | 135171583 | C10orf125;C10orf125                                                                        | 0.0334141   | 0.327428465806945   | 0.095825285715459  |
| cg02067722 | 6  | 137144131 | PEX7                                                                                       | 0.00671954  | 0.496103372705634   | 0.095825285715459  |
| cg16501572 | 11 | 71934660  | INPL1                                                                                      | 0.0171507   | 0.951394214926675   | 0.095825285715459  |
| cg18942110 | 15 | 91072797  | CRTC3;CRTC3                                                                                | 0.0154534   | 0.4751157173503833  | 0.095825285715459  |
| cg06869971 | 15 | 69706519  | KIF23;KIF23                                                                                | 0.0166184   | 0.558829379616014   | 0.095825285715459  |
| cg12821161 | 11 | 65101842  | DPF2                                                                                       | 0.0126237   | 0.492802702285788   | 0.095825285715459  |
| cg17186539 | 19 | 10628196  | S1PR5;S1PR5                                                                                | 0.0268277   | 0.438249547481917   | 0.095825285715459  |
| cg22861561 | 12 | 48397730  | COL2A1;COL2A1                                                                              | 0.0386446   | 0.418509365845269   | 0.0958960330108476 |
| cg00755496 | 3  | 52257183  | TLR9                                                                                       | -0.00710135 | -0.0104389179381919 | 0.0959205150229736 |
| cg25634545 | 10 | 104154207 | NFKB2;NFKB2;NFKB2                                                                          | 0.0073417   | 0.401946821450228   | 0.0959205150229736 |
| cg20048602 | 1  | 1310743   | AURKAIP1;AURKAIP1;AURKAIP1                                                                 | 0.0376998   | 0.419453989873664   | 0.0959205150229736 |
| cg17101358 | 17 | 42422688  | GRN;GRN                                                                                    | 0.00507082  | 0.366501503782565   | 0.0959205150229736 |
| cg06404838 | 11 | 117015391 | PAFAH1B2                                                                                   | 0.0118467   | 0.540470356235641   | 0.0959205150229736 |
| cg22674613 | 6  | 44310331  | SPATS1                                                                                     | 0.0151697   | 0.483347792132847   | 0.0959205150229736 |
| cg00172020 | 3  | 150264474 | SERP1;EIF2A                                                                                | 0.0075823   | 0.364532259916093   | 0.0959205150229736 |
| cg22078572 | 18 | 61033618  | KDSR                                                                                       | 0.00909237  | 0.400919724585409   | 0.0959205150229736 |
| cg00754426 | 20 | 37100437  | RALGAPB                                                                                    | -0.0440968  | -0.169143528791704  | 0.0959461581571344 |
| cg00515575 | 2  | 47168619  | TTC7A;TTC7A;TTC7A;TTC7A;TTC7A;MCFD2;MCFD2;TTC7A;TTC7A                                      | 0.0345741   | 0.636008710522672   | 0.0959601268193507 |
| cg13675624 | 12 | 6419136   | PLEKHG6;PLEKHG6                                                                            | -0.0431372  | -0.084830603282001  | 0.0959601268193507 |
| cg04744597 | 5  | 160976197 | GABRB2;GABRB2                                                                              | 0.00395748  | 0.3527432711488     | 0.0959700551562448 |
| cg11594927 | 6  | 29720600  |                                                                                            | 0.0143807   | 0.510259203654395   | 0.0959700551562448 |
| cg03826535 | 12 | 113659136 | TPCN1;TPCN1;IQCD                                                                           | 0.0109294   | 0.671248625581166   | 0.0960488469819885 |
| cg27314741 | 19 | 46144881  | EML2-AS1;EML2-AS1;EML2;EML2;EML2;EML2                                                      | 0.0204924   | 0.999836098512718   | 0.0960488469819885 |
| cg21845957 | 14 | 103988428 | CKB                                                                                        | 0.0964629   | 0.936365775734163   | 0.0960488469819885 |
| cg04497885 | 19 | 42747008  | GSK3A                                                                                      | 0.0124662   | 0.774179894235665   | 0.0960488469819885 |
| cg13863753 | 8  | 38855115  | ADAM9;TM2D2;ADAM9;ADAM9;TM2D2;TM2D2;ADAM9;TM2D2                                            | 0.0071638   | 0.24895360796396    | 0.0960488469819885 |
| cg10217975 | 3  | 52091484  | DUSP7                                                                                      | 0.00676693  | 0.5468004439663229  | 0.0960488469819885 |
| cg15017004 | 18 | 2906290   | EMILIN2                                                                                    | 0.0227834   | 0.598451873682719   | 0.0960488469819885 |
| cg00022308 | 2  | 27851831  | CCDC121;CCDC121;GPN1;CCDC121;GPN1;GPN1;GPN1;CCDC121;GPN1                                   | 0.0149008   | 0.554967700173088   | 0.0960488469819885 |
| cg27470027 | 11 | 63684601  | RCOR2                                                                                      | 0.0400417   | 0.222615652684209   | 0.0960488469819885 |
| cg02979923 | 20 | 17207337  | PCSK2                                                                                      | 0.0276014   | 0.379725565446538   | 0.0961692096056076 |
| cg20801666 | 22 | 20103296  | RANBP1;TRMT2A;TRMT2A;TRMT2A;TRMT2A;TRMT2A;TRMT2A;TRMT2A;TRMT2A;TRMT2A;MIR6816              | 0.0120083   | 0.0204190263329073  | 0.0961692096056076 |
| cg14057961 | 14 | 65007327  | HSPA2;HSPA2                                                                                | 0.0158858   | 0.54297304908356    | 0.0961692096056076 |
| cg07240937 | 1  | 153650963 | 1,00 NPR                                                                                   | 0.0122948   | 0.472899094218107   | 0.0962258183199315 |
| cg17416165 | 5  | 99382140  |                                                                                            | -0.0366482  | -0.0716551865621851 | 0.0962258183199315 |
| cg16852685 | 4  | 154712145 |                                                                                            | 0.0101339   | 0.270167756910475   | 0.0962258183199315 |
| cg12208612 | 3  | 169490789 | MYNN                                                                                       | 0.00612676  | 0.432074329806372   | 0.0962258183199315 |
| cg06489364 | 1  | 19578250  | EMC1;EMC1;EMC1;EMC1;MRT04;MRT04                                                            | 0.0432157   | 0.618588482562684   | 0.0963094788156769 |
| cg16124571 | 1  | 115212670 | DENND2C;DENND2C                                                                            | 0.0150701   | 0.500746068301      | 0.0963094788156769 |
| cg19910128 | 1  | 1496936   | SSU72                                                                                      | -0.0260168  | -0.040060904498872  | 0.0963094788156769 |
| cg18645335 | 19 | 17858607  | FCHO1;FCHO1;FCHO1;FCHO1                                                                    | 0.017473    | 0.656126663422306   | 0.0963463878159874 |
| cg06704518 | 8  | 11565530  | GATA4                                                                                      | 0.0116859   | 0.310171962311147   | 0.0963463878159874 |
| cg07357178 | 8  | 49534582  | LOC101929217;LOC101929268                                                                  | -0.0409751  | -0.073612862575434  | 0.096379483368019  |
| cg17988623 | 11 | 117025270 | PAFAH1B2                                                                                   | -0.0111737  | -0.0165392089209149 | 0.0963816770539127 |
| cg02852436 | 20 | 2821472   | FAM113A;VPS16;VPS16                                                                        | 0.0371954   | 0.899174949286332   | 0.0963857721353605 |
| cg10221240 | 4  | 1004669   | FGFRL1;FGFRL1                                                                              | 0.00704783  | 0.586297304299412   | 0.0963857721353605 |
| cg02957340 | 14 | 100070899 | CCDC85C                                                                                    | 0.0110734   | 0.496886132865559   | 0.096403443042662  |
| cg11110643 | 11 | 72929135  | P2RY2;P2RY2;P2RY2                                                                          | 0.026147    | 0.317326255008226   | 0.096403443042662  |
| cg09423703 | 2  | 71115230  |                                                                                            | 0.0122531   | 0.506612334576577   | 0.096403443042662  |
| cg12956230 | 9  | 88556256  | NAA35                                                                                      | 0.0175839   | 1.21666927174733    | 0.096403443042662  |
| cg13332172 | 19 | 37178884  | ZNF567                                                                                     | 0.0205056   | 0.631792366364404   | 0.096403443042662  |
| cg17271592 | 1  | 149821902 | HIST2H2AA4;HIST2H2AA3                                                                      | 0.0146247   | 0.565116117213023   | 0.096403443042662  |
| cg26691953 | 12 | 49110790  | CCNT1                                                                                      | 0.00813395  | 0.478124014135594   | 0.096403443042662  |
| cg22882523 | 8  | 145107012 | OPLAH                                                                                      | 0.018497    | 0.492165092140383   | 0.096403443042662  |
| cg01076051 | 5  | 130329564 |                                                                                            | -0.0561129  | -0.0984665813190005 | 0.096403443042662  |
| cg25181699 | 11 | 300688    | IFITM5                                                                                     | -0.0424064  | -0.114053668533962  | 0.096403443042662  |
| cg08229018 | 4  | 119274133 | PRSS12                                                                                     | 0.0499507   | 0.551667056201455   | 0.096403443042662  |
| cg22965663 | 14 | 7787393   | POMT2;GSTZ1;GSTZ1;GSTZ1;GSTZ1;GSTZ1                                                        | 0.0260457   | 1.086439255005297   | 0.096403443042662  |
| cg08621286 | 7  | 1200209   | LOC101927021;LOC101927021;LOC101927021;LOC101927021;LOC101927021;LOC101927021;LOC101927021 | 0.00721278  | 0.426623672629618   | 0.096403443042662  |
| cg09692733 | 19 | 10249298  | DNMT1;DNMT1;DNMT1;DNMT1                                                                    | 0.00618028  | 0.00925597718497841 | 0.096403443042662  |
| cg27425511 | 19 | 11033935  | YIPF2;C19orf52                                                                             | 0.0184708   | 0.657003451796382   | 0.096403443042662  |
| cg21988584 | 14 | 31281516  |                                                                                            | -0.0567468  | -0.0941938772778178 | 0.0964261777650068 |
| cg11154382 | 17 | 48227323  | PPP1R9B                                                                                    | 0.00305286  | 0.280939598773599   | 0.0964261777650068 |
| cg15176005 | 1  | 228122465 | WNT9A                                                                                      | -0.0458682  | -0.0743527520683661 | 0.0964398543063559 |
| cg22045228 | 2  | 8581875   | ELMOD3;ELMOD3;ELMOD3;ELMOD3;ELMOD3;ELMOD3;ELMOD3;ELMOD3;ELMOD3;ELMOD3                      | 0.00578353  | 0.408850419353185   | 0.0964398543063559 |
| cg02693002 | 10 | 126106594 | OAT                                                                                        | 0.0412379   | 0.252381523172033   | 0.0964830393059253 |
| cg09718640 | 2  | 113522225 | CKAP2L;CKAP2L                                                                              | 0.00955557  | 0.740525068397686   | 0.0964830393059253 |
| cg08376191 | 3  | 160283074 | KPNA4;KPNA4                                                                                | 0.0191003   | 0.81214081008018    | 0.0964830393059253 |
| cg13525064 | 2  | 73114426  | SPR                                                                                        | 0.0145868   | 0.455410036538882   | 0.0964830393059253 |
| cg27467005 | 19 | 17622279  | PGLS                                                                                       | 0.0394466   | 0.899376208540485   | 0.0964830393059253 |
| cg17429065 | 1  | 6453910   | ACOT7                                                                                      | 0.0396877   | 0.581248763238148   | 0.0964830393059253 |
| cg22545535 | 17 | 17495014  | PENT;PENT;PENT;PENT;PENT                                                                   | 0.0243102   | 0.940719428201807   | 0.0964943169183351 |

|            |    |           |                                                               |             |                      |                    |
|------------|----|-----------|---------------------------------------------------------------|-------------|----------------------|--------------------|
| cg26378157 | 16 | 89984203  | MC1R                                                          | 0.00647391  | 0.374298536557293    | 0.0965612810475103 |
| cg19331885 | 11 | 119722305 |                                                               | -0.0370423  | -0.0595987442263674  | 0.0966217334135386 |
| cg11686528 | 17 | 1083002   | ABR;ABR                                                       | 0.0364663   | 0.699317794355933    | 0.0966217334135386 |
| cg17703880 | 8  | 87110636  | ATP6V0D2                                                      | -0.0296469  | -0.0468666762466742  | 0.0966263586900543 |
| cg06430572 | 21 | 46221894  | UBE2G2;UBE2G2                                                 | 0.0146731   | 0.422489140471635    | 0.0966263586900543 |
| cg05225390 | 11 | 113644407 | ZW10;ZW10                                                     | 0.0113213   | 0.392578236732517    | 0.0966263586900543 |
| cg12434394 | 18 | 10663708  | LOC101927410                                                  | -0.0191919  | -0.0297518178937672  | 0.0966700092915516 |
| cg14902146 | 15 | 90294607  | MESP1                                                         | 0.011959    | 0.925899746626606    | 0.0966896620726204 |
| cg11718780 | 1  | 200728684 | CAMSAP1L1                                                     | -0.0673931  | -0.130117481639868   | 0.0966896620726204 |
| cg14940233 | 8  | 3429428   | CSMD1                                                         | -0.0296755  | -0.0502556625088459  | 0.0966896620726204 |
| cg07010075 | 2  | 121199631 |                                                               | 0.0187699   | 0.478928106958077    | 0.0966896620726204 |
| cg13699414 | 5  | 178957880 |                                                               | 0.0444495   | 0.872012088187862    | 0.0966896620726204 |
| cg10583683 | 15 | 23034700  | NIPA2;NIPA2;NIPA2;NIPA2                                       | 0.0470995   | 1.27529626075875     | 0.0966896620726204 |
| cg02692785 | 11 | 84148821  | DLG2;DLG2                                                     | 0.0063024   | 0.312962068973882    | 0.0966896620726204 |
| cg01840575 | 2  | 38977957  | SFRS7                                                         | 0.0547502   | 0.765802025391088    | 0.0966896620726204 |
| cg09378707 | 11 | 3836728   | PGAP2;PGAP2;PGAP2;PGAP2;PGAP2;PGAP2;PGAP2;PGAP2;PGAP2;PGAP2;P | -0.0183248  | -0.0278936182695191  | 0.0966896620726204 |
| cg04067803 | 2  | 56462511  | CCDC85A                                                       | -0.0167454  | -0.0256081702554842  | 0.0967040744029192 |
| cg16439512 | 15 | 57598924  | LOC283663                                                     | 0.0379036   | 0.366967302127825    | 0.0967040744029192 |
| cg17100705 | 21 | 45148737  | PDXK                                                          | 0.0163307   | 0.956065454596925    | 0.096714146717445  |
| cg08894790 | 4  | 177241590 | SPCS3                                                         | 0.00995849  | 0.573090518361369    | 0.096714146717445  |
| cg20132549 | 11 | 442189    | ANO9                                                          | 0.0164221   | 0.343467730267822    | 0.0967438331139809 |
| cg23637624 | 8  | 124387949 | ATAD2                                                         | -0.0233193  | -0.0363454884403469  | 0.0967663247664824 |
| cg23422604 | 22 | 43364847  | PACSIN2                                                       | -0.0731072  | -0.131799412132615   | 0.0967663247664824 |
| cg02465374 | 6  | 166401700 | LOC441177;C6orf176;C6orf176                                   | 0.00554467  | 0.376963966546219    | 0.0967663247664824 |
| cg14889079 | 19 | 54606153  | NDUFA3                                                        | 0.0471317   | 0.350301353072845    | 0.0967663247664824 |
| cg09754991 | 13 | 107220236 | ARGLU1                                                        | 0.00450809  | 0.330699353167246    | 0.0967663247664824 |
| cg26924044 | 16 | 2920939   |                                                               | -0.0876869  | -0.194240587063345   | 0.0967663247664824 |
| cg10835773 | 6  | 19753491  |                                                               | -0.0619211  | -0.129504430305123   | 0.0967663247664824 |
| cg26687499 | 3  | 135914775 | MSL2;MSL2                                                     | 0.0326865   | 1.21691168106168     | 0.0967663247664824 |
| cg16131972 | 20 | 45282877  | SLC13A3                                                       | -0.0175236  | -0.0265582447171671  | 0.0968329730628465 |
| cg09463047 | 17 | 36104218  | HNF1B;HNF1B                                                   | 0.00445612  | 0.370583717909647    | 0.0968329730628465 |
| cg01477385 | 14 | 103995350 | TRMT61A                                                       | 0.00400341  | 0.434777934487659    | 0.0968329730628465 |
| cg10820715 | 1  | 214470024 | SMYD2                                                         | -0.019688   | -0.0306598899967127  | 0.0968329730628465 |
| cg18247177 | 17 | 7745472   | KDM6B                                                         | 0.0176396   | 0.526744688236024    | 0.0968329730628465 |
| cg05846056 | 1  | 59762542  | FGGY;FGGY                                                     | 0.00761501  | 0.518897776068765    | 0.0968329730628465 |
| cg16000824 | 11 | 1143665   |                                                               | -0.0468603  | -0.0808758339337879  | 0.0968329730628465 |
| cg12187687 | 7  | 27253834  |                                                               | -0.103816   | -0.241979346040982   | 0.0968468936374364 |
| cg18647237 | 5  | 43017561  |                                                               | 0.00663785  | 0.390238688353276    | 0.0969013265175139 |
| cg01679512 | 13 | 114108652 | ADPRHL1                                                       | 0.0080569   | 0.012112355721076    | 0.0969013265175139 |
| cg19620922 | 21 | 46824536  | COL18A1                                                       | 0.0331619   | 0.358320930544104    | 0.0969013265175139 |
| cg07158701 | 17 | 40540601  | STAT3;STAT3;STAT3                                             | 0.00951655  | 0.931916156829124    | 0.0969021271937684 |
| cg06725204 | 7  | 129027898 | AHCYL2;AHCYL2;AHCYL2;AHCYL2                                   | -0.00670513 | -0.00988737736095067 | 0.0969938011718534 |
| cg03476862 | 7  | 98581334  | TRRAP                                                         | -0.00604082 | -0.00686511561224142 | 0.0969938011718534 |
| cg03331924 | 1  | 208038413 |                                                               | -0.0478749  | -0.0795610057498883  | 0.0969938011718534 |
| cg03462171 | 16 | 1664488   | CRAMP1L                                                       | 0.0502273   | 0.255481877042465    | 0.0969938011718534 |
| cg04839422 | 22 | 44287876  | PNPLA5                                                        | 0.00764434  | 0.415526506514623    | 0.0969938011718534 |
| cg05311119 | 4  | 1805090   | FGFR3;FGFR3;FGFR3                                             | -0.0374826  | -0.0597922855072129  | 0.0970113870034738 |
| cg04950743 | 2  | 39002436  |                                                               | -0.0532376  | -0.0903457839545397  | 0.0970816236032976 |
| cg20723436 | 2  | 139428554 | NXP2                                                          | -0.0246452  | -0.0401595241316243  | 0.0970816236032976 |
| cg07066932 | 1  | 24285945  | PNRC2                                                         | 0.0123453   | 0.788042155373288    | 0.0970816236032976 |
| cg14355911 | 17 | 59473456  |                                                               | 0.03333     | 0.646397361798611    | 0.0970816236032976 |
| cg26454158 | 19 | 12273814  | ZNF136                                                        | 0.00449625  | 0.304325635844268    | 0.0970816236032976 |
| cg22876918 | 17 | 4458867   | MYBBP1A;MYBBP1A                                               | 0.0151767   | 0.574025497679461    | 0.0970992549304238 |
| cg27638453 | 6  | 157470150 | ARID1B;ARID1B;ARID1B                                          | 0.00339607  | 0.0049677148761993   | 0.0970992549304238 |
| cg05871607 | 1  | 28241317  | RPA2                                                          | 0.0263445   | 0.62933443820143     | 0.0970992549304238 |
| cg13521940 | 21 | 36262239  | RUNX1;RUNX1;RUNX1                                             | 0.012438    | 0.57410407496326     | 0.0970992549304238 |
| cg01526748 | 3  | 191930926 | FGF12;FGF12                                                   | 0.028255    | 0.048688452789902    | 0.0970992549304238 |
| cg10300729 | 10 | 65284527  | REEP3                                                         | -0.0861046  | -0.17231895045283    | 0.0971392044553465 |
| cg11087358 | 12 | 57940980  | DCTN2                                                         | 0.0141974   | 0.350531988886453    | 0.0971392044553465 |
| cg11992317 | 20 | 44520160  | CTSA;CTSA;NEURL2;CTSA                                         | 0.00903153  | 0.601528846241619    | 0.0971392044553465 |
| cg17739868 | 6  | 157751337 |                                                               | 0.00968613  | 0.014379847670877    | 0.0971392044553465 |
| cg22437161 | 7  | 155605081 | SHH                                                           | 0.0187452   | 0.546155843703273    | 0.0971392044553465 |
| cg11482099 | 11 | 31833477  | PAX6;PAX6;PAX6                                                | 0.0111266   | 0.51388708156276     | 0.0971392044553465 |
| cg24902504 | 1  | 206858868 | MAPKAPK2;MAPKAPK2                                             | 0.00833536  | 0.510739863814459    | 0.0971392044553465 |
| cg02126788 | 1  | 116381660 | NHLH2;NHLH2                                                   | 0.0238042   | 0.599681261604773    | 0.0971392044553465 |
| cg00929855 | 6  | 31783364  | HSPA1A;HSPA1L;HSPA1A                                          | 0.0249482   | 1.07014863657023     | 0.0971392044553465 |
| cg04220579 | 7  | 915756    | C7orf20                                                       | 0.00966809  | 0.53160622083214     | 0.0971392044553465 |
| cg09217023 | 3  | 9394237   |                                                               | -0.0888773  | -0.182712903200915   | 0.0971392044553465 |
| cg16259886 | 2  | 32265121  | DPY30                                                         | 0.023834    | 0.730407870103392    | 0.0971392044553465 |
| cg18838941 | 10 | 15376939  | FAM171A1                                                      | -0.00790557 | -0.011722759632983   | 0.0971392044553465 |
| cg23828635 | 10 | 14642921  | FAM107B                                                       | -0.0519412  | -0.0862946265650665  | 0.0971392044553465 |
| cg13499067 | 11 | 10879629  | ZBED5;ZBED5                                                   | 0.0298143   | 1.10955848156195     | 0.0971392044553465 |
| cg04378177 | 9  | 100505109 |                                                               | -0.037812   | -0.0614610123339234  | 0.0971392044553465 |
| cg10519154 | 11 | 67212322  | CORO1B;CORO1B                                                 | 0.00688178  | 0.0104154422435993   | 0.0971392044553465 |
| cg10780164 | 10 | 135149009 | CALY                                                          | 0.00986699  | 0.7599326023285      | 0.0971392044553465 |
| cg16808455 | 18 | 12309071  | TUBB6                                                         | 0.0335702   | 0.471202649777177    | 0.0971392044553465 |
| cg24445840 | 22 | 34292239  | LARGE;LARGE                                                   | -0.0441299  | -0.0800350956172378  | 0.0971392044553465 |
| cg18021265 | 2  | 220462522 | STK11IP                                                       | 0.00371383  | 0.295003056280063    | 0.0971392044553465 |
| cg01600100 | 12 | 96794307  | CDK17;CDK17                                                   | 0.0314165   | 0.289289314461773    | 0.0971392044553465 |
| cg27190946 | 15 | 32639011  |                                                               | 0.0451917   | 0.814387116064525    | 0.0971392044553465 |
| cg12380209 | 10 | 120515094 | C10orf46                                                      | 0.00638668  | 0.647794232742701    | 0.0971392044553465 |
| cg07342403 | 6  | 131081554 |                                                               | -0.0316058  | -0.0501569644842207  | 0.0971392044553465 |

|            |    |           |                                                                                 |            |                     |                    |
|------------|----|-----------|---------------------------------------------------------------------------------|------------|---------------------|--------------------|
| cg11105718 | 8  | 102586527 | GRHL2                                                                           | -0.0602998 | -0.135937569260882  | 0.0971392044553465 |
| cg10017641 | 1  | 203606297 | ATP2B4;ATP2B4                                                                   | -0.0621275 | -0.105971695479026  | 0.0971392044553465 |
| cg02573276 | 1  | 2344586   | PEX10;PEX10                                                                     | 0.00551886 | 0.336077948294346   | 0.0971392044553465 |
| cg24145357 | 7  | 92219539  | FAM133B;FAM133B;FAM133B;FAM133D;FAM133B                                         | 0.0438736  | 0.838960302166194   | 0.0971392044553465 |
| cg12442015 | 1  | 2323763   | MORN1;RER1                                                                      | 0.0123631  | 0.623744892237704   | 0.0971392044553465 |
| cg09602251 | 10 | 25245759  |                                                                                 | -0.0539925 | -0.10197205114379   | 0.0971392044553465 |
| cg18008202 | 2  | 131100479 | IMP4;CCDC115                                                                    | 0.0267309  | 0.696781157395487   | 0.0971392044553465 |
| cg16734281 | 18 | 43684176  | ATP5A1;ATP5A1;HAUS1;HAUS1                                                       | 0.022626   | 0.815796722590457   | 0.0971392044553465 |
| cg16364833 | 2  | 70121066  | SNRNP27                                                                         | 0.0209897  | 0.617526693706062   | 0.0971392044553465 |
| cg26968387 | 19 | 37569268  | ZNF420                                                                          | 0.00423363 | 0.321685735541239   | 0.0971392044553465 |
| cg14310703 | 3  | 126006903 |                                                                                 | 0.0252508  | 0.468776899642106   | 0.0971392044553465 |
| cg01988459 | 11 | 68622903  |                                                                                 | 0.0172022  | 0.4808775670722     | 0.0971392044553465 |
| cg13360126 | 14 | 52292059  |                                                                                 | -0.0404004 | -0.0667018903293892 | 0.0971392044553465 |
| cg19196684 | 1  | 53608037  | SLC1A7                                                                          | -0.023936  | -0.0380090658574126 | 0.0971509674954701 |
| cg26263043 | 3  | 39262442  |                                                                                 | -0.0359014 | -0.253071167425549  | 0.0971509674954701 |
| cg03649606 | 16 | 89501735  | ANKRD11                                                                         | -0.0519164 | -0.102379878474101  | 0.0971509674954701 |
| cg22711430 | 17 | 53418967  |                                                                                 | -0.0224925 | -0.0353089265703771 | 0.0971509674954701 |
| cg06186663 | 14 | 81687575  | GTF2A1;GTF2A1;GTF2A1                                                            | 0.0103743  | 0.448480523707902   | 0.0972403512064214 |
| cg11573637 | 6  | 41755210  | TOMM6;TOMM6                                                                     | 0.0169283  | 0.770875925398104   | 0.0972403512064214 |
| cg15554875 | 2  | 45236686  | SIX2                                                                            | 0.0180449  | 0.452445222854809   | 0.0972437984886374 |
| cg04025889 | 20 | 32891089  | AHCY;AHCY;AHCY                                                                  | 0.00637501 | 0.289129819090631   | 0.0972437984886374 |
| cg19510792 | 5  | 16935695  | MYO10                                                                           | 0.00694837 | 0.369609584489084   | 0.097256766073146  |
| cg00287831 | 3  | 184081167 | POLR2H                                                                          | 0.0115159  | 0.561239927697744   | 0.0972598314084044 |
| cg22629515 | 1  | 243712954 | AKT3;AKT3                                                                       | -0.039824  | -0.039994463941562  | 0.0972896471212305 |
| cg04613990 | 3  | 49096748  | QRICH1;QRICH1                                                                   | -0.077406  | -0.147815344329603  | 0.097298752294498  |
| cg25801746 | 8  | 9046480   |                                                                                 | -0.0399974 | -0.0647784621095468 | 0.097298752294498  |
| cg16930880 | 2  | 177373410 |                                                                                 | -0.0606477 | -0.118095198652939  | 0.0972999594285597 |
| cg01727346 | 22 | 45596797  | C22orf9;C22orf9                                                                 | -0.0814043 | -0.16963319115713   | 0.0972999594285597 |
| cg26560222 | 1  | 50888826  | DMRTA2;DMRTA2                                                                   | 0.017569   | 0.395404028367604   | 0.0972999594285597 |
| cg08588104 | 6  | 15494473  | JARID2;JARID2                                                                   | -0.0343435 | -0.0530985739996355 | 0.0972999594285597 |
| cg12442376 | 1  | 38869276  |                                                                                 | -0.0470784 | -0.0793600924102757 | 0.0972999594285597 |
| cg11826116 | 22 | 39916314  | ATF4;ATF4                                                                       | 0.0233832  | 0.888434102196265   | 0.0972999594285597 |
| cg22114242 | 12 | 110376950 | GIT2;GIT2;GIT2;GIT2;GIT2;GIT2;GIT2;GIT2;GIT2                                    | 0.00692602 | 0.0103354112833521  | 0.0972999594285597 |
| cg22183049 | 5  | 139143972 |                                                                                 | 0.0144089  | 0.488572649898027   | 0.0972999594285597 |
| cg09210331 | 6  | 7108204   | RREB1;RREB1;RREB1;RREB1;RREB1;RREB1;RREB1                                       | 0.0225634  | 0.756451778648312   | 0.0972999594285597 |
| cg10092374 | 17 | 79988647  | RAC3;LRRC45                                                                     | 0.00983194 | 0.614521730566776   | 0.0972999594285597 |
| cg07837102 | 6  | 32940879  | BRD2;BRD2                                                                       | 0.0133592  | 0.365080583536294   | 0.0972999594285597 |
| cg14576258 | 9  | 88513789  |                                                                                 | -0.0325975 | -0.0573747955321205 | 0.0972999594285597 |
| cg13246328 | 12 | 28179213  |                                                                                 | -0.0510545 | -0.104480460173782  | 0.0974642850658026 |
| cg21647170 | 7  | 56119546  | CCT6A;PSPH;CCT6A                                                                | 0.0195124  | 0.380311112285465   | 0.0974642850658026 |
| cg23709617 | 10 | 135030554 | KNDC1                                                                           | 0.00694653 | 0.0102687140218129  | 0.0974642850658026 |
| cg17967429 | 10 | 90711500  | ACTA2;ACTA2                                                                     | 0.0117439  | 0.0175165635168293  | 0.0974642850658026 |
| cg00934997 | 14 | 73957439  | C14orf169;HEATR4                                                                | 0.02606    | 0.214553349562155   | 0.0974642850658026 |
| cg10216074 | 2  | 25467197  | DNMT3A;DNMT3A;DNMT3A;DNMT3A;DNMT3A                                              | 0.015398   | 0.0250343076139353  | 0.0974642850658026 |
| cg24608684 | 6  | 130686865 |                                                                                 | 0.0348688  | 0.829719382602233   | 0.0974642850658026 |
| cg10494282 | 1  | 44440945  | ATP6V0B;ATP6V0B                                                                 | 0.0388412  | 0.48558540637926    | 0.0974687993320465 |
| cg21813478 | 20 | 2645987   | IDH3B;IDH3B;IDH3B                                                               | -0.0491717 | -0.080512207556799  | 0.0974687993320465 |
| cg13870080 | 11 | 19303281  |                                                                                 | -0.102048  | -0.221473789001999  | 0.0974687993320465 |
| cg26902735 | 15 | 64679755  | TRIP4;KIAA0101                                                                  | 0.00398919 | 0.388162660631123   | 0.0974687993320465 |
| cg24931017 | 20 | 59600990  |                                                                                 | 0.0059908  | 0.0080940469373674  | 0.0974687993320465 |
| cg12467096 | 11 | 71936303  | INPL1                                                                           | 0.0123696  | 0.590196784046286   | 0.0974687993320465 |
| cg17552958 | 2  | 74734862  | PCGF1                                                                           | 0.0101858  | 0.45435413148551    | 0.0974687993320465 |
| cg10822418 | 8  | 61430157  | RAB2A                                                                           | 0.0180252  | 0.47887899384585    | 0.0974687993320465 |
| cg14856684 | 14 | 65439245  | RAB15                                                                           | 0.00809957 | 0.410080254561945   | 0.0974687993320465 |
| cg00658427 | 14 | 102431823 | DYNC1H1                                                                         | 0.0078433  | 0.285882088475482   | 0.0974687993320465 |
| cg24926008 | 4  | 140374789 | RAB33B                                                                          | 0.0151742  | 0.928015763566676   | 0.0974687993320465 |
| cg17846194 | 12 | 49485900  | DHH                                                                             | 0.0105995  | 0.313353783583756   | 0.0974687993320465 |
| cg00993710 | 7  | 150722703 | ATG9B                                                                           | -0.0529409 | -0.0945819554191462 | 0.0974687993320465 |
| cg04832767 | 7  | 96632841  | DLX6AS                                                                          | 0.00922232 | 0.370408303178588   | 0.0974687993320465 |
| cg23965429 | 14 | 99740998  |                                                                                 | 0.0384759  | 0.501704637958639   | 0.0974687993320465 |
| cg01188574 | 19 | 925914    | ARID3A                                                                          | 0.0165574  | 0.583658325042038   | 0.097487839112932  |
| cg03598754 | 17 | 26711803  | SARM1                                                                           | 0.0605669  | 0.660936716020076   | 0.0974966086427733 |
| cg26756119 | 2  | 71836673  | DYSF;DYSF;DYSF;DYSF;DYSF;DYSF;DYSF;DYSF;DYSF;DYSF;DYSF;DYSF;DYSF;DYSF;DYSF;DYSF | -0.0513168 | -0.0927314570722934 | 0.0975440257156536 |
| cg21354621 | 12 | 46384284  | SFRS2IP;SFRS2IP                                                                 | 0.00992794 | 0.417690902355736   | 0.0975440257156536 |
| cg27334906 | 1  | 100443213 | SLC35A3;SLC35A3;SLC35A3                                                         | -0.0365914 | -0.0581693125454442 | 0.0975440257156536 |
| cg00371926 | 18 | 55289231  | NARS                                                                            | 0.0157407  | 0.32364462994798    | 0.0975440257156536 |
| cg03185820 | 7  | 149158252 | ZNF777                                                                          | 0.0108509  | 0.404633088642033   | 0.0975440257156536 |
| cg18586919 | 19 | 40005649  | SELV                                                                            | 0.00367227 | 0.282032141642873   | 0.0975440257156536 |
| cg01810763 | 12 | 104683571 | TXNRD1;TXNRD1;TXNRD1;TXNRD1                                                     | -0.0628681 | -0.147850082562503  | 0.0975440257156536 |
| cg20018267 | 7  | 138145918 | TRIM24;TRIM24                                                                   | 0.00516847 | 0.486313383749317   | 0.0975553260361899 |
| cg17050724 | 17 | 79008885  | FLJ90757;BAIAP2;BAIAP2;BAIAP2;BAIAP2                                            | 0.026829   | 0.334412652985919   | 0.097598251185222  |
| cg23004862 | 5  | 175669020 | C5orf25                                                                         | -0.0314354 | -0.0501708946274056 | 0.097598251185222  |
| cg24123355 | 14 | 102904584 | TECPR2                                                                          | 0.0276512  | 0.601400500479099   | 0.097598251185222  |
| cg03210277 | 1  | 26233332  | STMN1;STMN1;STMN1;STMN1;STMN1                                                   | 0.0126971  | 0.37569859933908    | 0.0976239424882612 |
| cg07808805 | 13 | 52487022  |                                                                                 | -0.0307314 | -0.0599892429064045 | 0.0976239424882612 |
| cg10204807 | 1  | 234350515 | SLC35F3                                                                         | 0.00905716 | 0.443365298760855   | 0.0976239424882612 |
| cg16858898 | 1  | 15479872  | TMEM51;TMEM51;TMEM51;TMEM51;C1orf126                                            | 0.0184512  | 0.480361694204561   | 0.0976239424882612 |
| cg25048357 | 11 | 118955763 | HMB5                                                                            | 0.0241236  | 0.692179451615493   | 0.0976239424882612 |
| cg05694921 | 1  | 29587117  | PTPRU;PTPRU;PTPRU                                                               | 0.0366123  | 0.390887880864671   | 0.0976239424882612 |
| cg03115081 | 17 | 74722049  | C17orf95;JMJ D6;JMJ D6                                                          | 0.00561189 | 0.450902421261896   | 0.0976239424882612 |
| cg00494761 | 2  | 86564659  | REEP1;REEP1;REEP1;REEP1;REEP1;REEP1                                             | 0.0188873  | 0.50760807493419    | 0.0976239424882612 |
| cg13385156 | 4  | 1750374   |                                                                                 | 0.00844176 | 0.306565516330667   | 0.0976239424882612 |

|            |    |           |                                                                |             |                      |                    |
|------------|----|-----------|----------------------------------------------------------------|-------------|----------------------|--------------------|
| cg12938425 | 14 | 104605300 | KIF26A                                                         | 0.0143426   | 0.476803165237093    | 0.0976441713770261 |
| cg06388206 | 1  | 85514343  | MCOLN3;MCOLN3                                                  | 0.00879066  | 0.440562071098612    | 0.0976441713770261 |
| cg01399981 | 16 | 87812658  |                                                                | 0.0127438   | 0.478569855373634    | 0.0976441713770261 |
| cg14905657 | 12 | 16760048  | LMO3;LMO3                                                      | -0.0383318  | -0.131198565108907   | 0.0976441713770261 |
| cg25754449 | 8  | 145670366 | TONSL                                                          | 0.0274462   | 1.21988740710483     | 0.0976461934558231 |
| cg05673534 | 2  | 233750541 | NGEF;NGEF                                                      | -0.0479674  | -0.0796951749374154  | 0.0976461934558231 |
| cg25496627 | 7  | 123177030 |                                                                | -0.0597465  | -0.109404344639498   | 0.0976461934558231 |
| cg03760387 | 16 | 19566823  | C16orf62                                                       | 0.00992996  | 0.389857986142347    | 0.0976461934558231 |
| cg02584459 | 10 | 91295421  | SLC16A12                                                       | 0.0224261   | 0.405364921899116    | 0.0976461934558231 |
| cg10087092 | 20 | 62711744  | RGS19;OPRL1;RGS19;OPRL1                                        | 0.0116992   | 0.31441321874429     | 0.0976461934558231 |
| cg17564074 | 11 | 66080543  |                                                                | 0.010489    | 0.476231687445197    | 0.0976461934558231 |
| cg10583414 | 12 | 48207063  | HDAC7;HDAC7                                                    | 0.00994914  | 0.581065008167342    | 0.0976461934558231 |
| cg16854524 | 4  | 83931902  | LIN54;LIN54;LIN54;LIN54;LIN54                                  | 0.0221565   | 0.461918740509557    | 0.0976461934558231 |
| cg18934409 | 19 | 35167332  | ZNF302;ZNF302                                                  | -0.00984019 | -0.0148371223954837  | 0.0976461934558231 |
| cg24953506 | 1  | 12079889  | MIIP                                                           | 0.0148162   | 1.18016546348556     | 0.0976461934558231 |
| cg11394151 | 11 | 2372295   |                                                                | -0.0577189  | -0.0930101844864254  | 0.0976461934558231 |
| cg07129595 | 6  | 116883961 |                                                                | -0.0514945  | -0.0976630696546289  | 0.0976461934558231 |
| cg13405423 | 8  | 42011090  | AP3M2;AP3M2                                                    | 0.00637675  | 0.438228997498351    | 0.0977157487500235 |
| cg15387286 | 7  | 81638429  | LOC101927356;LOC101927356;CACNA2D1                             | -0.0536388  | -0.0994674103882199  | 0.0977157487500235 |
| cg09881865 | 19 | 46234197  | FBXO46                                                         | 0.00737296  | 0.440889642758671    | 0.0977157487500235 |
| cg19011063 | 5  | 170171465 |                                                                | 0.0180182   | 0.701871275646364    | 0.0977157487500235 |
| cg16372275 | 3  | 183856658 | EIF2B5                                                         | -0.0381253  | -0.0620868856214026  | 0.0977157487500235 |
| cg19406040 | 1  | 110527169 | AHCYL1                                                         | 0.0315326   | 0.633643556181958    | 0.0977684750089273 |
| cg21235465 | 18 | 48509680  | ELAC1                                                          | -0.0445405  | -0.07320305881537534 | 0.0977684750089273 |
| cg11674373 | 10 | 7708997   | ITIH5;ITIH5                                                    | 0.0157828   | 0.594126183932058    | 0.0977684750089273 |
| cg09091206 | 11 | 57508985  | C11orf31;C11orf31;TMX2-CTNND1                                  | 0.00551939  | 0.359904170562092    | 0.0977684750089273 |
| cg14743055 | 21 | 43430222  | ZNF295;ZNF295;ZNF295                                           | 0.0123738   | 0.477671086856557    | 0.0977684750089273 |
| cg00991794 | 6  | 125284212 | STL                                                            | 0.0158516   | 0.695123254600792    | 0.0977684750089273 |
| cg16761035 | 7  | 94285397  | SGCE;PEG10;SGCE;PEG10;SGCE                                     | 0.0580134   | 0.736944099320171    | 0.0977684750089273 |
| cg26407504 | 2  | 96068329  | FAHD2A                                                         | 0.00673283  | 0.492357633110451    | 0.0977684750089273 |
| cg02756152 | 11 | 62559437  | TMEM223                                                        | 0.00683809  | 0.467030994708532    | 0.0977684750089273 |
| cg01900557 | 2  | 56152001  | EFEMP1;EFEMP1                                                  | -0.0400659  | -0.0665184442333771  | 0.0977838276877468 |
| cg11732855 | 17 | 4046412   | ZZEF1;CYB5D2;CYB5D2;CYB5D2                                     | 0.00676693  | 0.450659717797602    | 0.0977838276877468 |
| cg22502962 | 2  | 95652521  |                                                                | -0.0334753  | -0.0635722171912413  | 0.0977838276877468 |
| cg17713864 | 17 | 48784765  | ANKRD40                                                        | 0.00969248  | 0.350273870691383    | 0.0977838276877468 |
| cg27100316 | 1  | 151735804 | OAZ3;MRPL9                                                     | 0.0060594   | 0.473503322826994    | 0.097815661138673  |
| cg00449899 | 8  | 53626436  | RB1CC1;RB1CC1                                                  | 0.022969    | 0.78858852600642     | 0.097815661138673  |
| cg11691170 | 11 | 130318691 | ADAMTS15                                                       | 0.0360962   | 0.615855345901301    | 0.097815661138673  |
| cg08343754 | 5  | 73980834  | HEXB                                                           | 0.0192762   | 0.458466082694391    | 0.097815661138673  |
| cg16975576 | 17 | 17991081  | DRG2                                                           | 0.0280583   | 0.780574909758507    | 0.097815661138673  |
| cg18493207 | 9  | 107526321 | NIPSNAP3B;NIPSNAP3B;NIPSNAP3B;NIPSNAP3B                        | 0.0238563   | 0.591919935833236    | 0.097815661138673  |
| cg25103172 | 2  | 95825271  | ZNF514                                                         | 0.0141509   | 0.634148577854232    | 0.097815661138673  |
| cg10233133 | 1  | 227505598 | CDC42BPA;CDC42BPA;CDC42BPA;CDC42BPA                            | 0.00461123  | 0.341542512925828    | 0.097815661138673  |
| cg06364629 | 2  | 27592939  | EIF2B4;SNX17;EIF2B4;EIF2B4                                     | 0.0178092   | 0.675261238729145    | 0.097820822918348  |
| cg02701615 | 3  | 14755338  | C3orf20                                                        | -0.0108551  | -0.0165263815533295  | 0.0978872819582686 |
| cg00190900 | 17 | 71170372  |                                                                | 0.00455054  | 0.00668951244955317  | 0.0978872819582686 |
| cg03787210 | 8  | 141521272 | CHRAC1;CHRAC1;CHRAC1                                           | 0.0174504   | 0.806404452050939    | 0.0978872819582686 |
| cg17400229 | 21 | 44527180  | U2AF1;U2AF1;U2AF1                                              | 0.00752061  | 0.519399542002839    | 0.0978872819582686 |
| cg20166204 | 3  | 67048633  | KBTBD8                                                         | 0.00773804  | 0.471595554879592    | 0.0978872819582686 |
| cg11777782 | 19 | 18284937  | IFI30                                                          | 0.0484517   | 0.514582069524087    | 0.0978872819582686 |
| cg07636095 | 6  | 27759817  |                                                                | 0.0267814   | 0.748419333041545    | 0.0978872819582686 |
| cg13180110 | 8  | 9008352   | PPP1R3B;PPP1R3B                                                | 0.00626454  | 0.339830098614728    | 0.0978872819582686 |
| cg21897413 | 5  | 176944084 | DDX41                                                          | 0.0131023   | 0.782273282571863    | 0.0979230651306459 |
| cg14432797 | 20 | 44261290  | WFDC9                                                          | -0.0300489  | -0.0511794693938904  | 0.0980040271242102 |
| cg01956354 | 22 | 38349940  | C22orf23;POLR2F                                                | 0.0271135   | 0.493527413960874    | 0.0980097805923784 |
| cg14809705 | 17 | 33814817  | SLFN12L                                                        | 0.00930775  | 0.29725924317332     | 0.0980097805923784 |
| cg04887328 | 17 | 16945603  | MPRIP;MPRIP                                                    | 0.0120798   | 0.590286579507277    | 0.0980097805923784 |
| cg02985139 | 13 | 112620260 |                                                                | -0.0363171  | -0.0617626461326118  | 0.0980097805923784 |
| cg16751764 | 10 | 82168743  | C10orf58                                                       | 0.0405427   | 0.629161551269719    | 0.0980097805923784 |
| cg07575812 | 5  | 138883510 |                                                                | -0.0211669  | -0.0323649737530469  | 0.0980097805923784 |
| cg23959009 | 4  | 83352458  | ENOPH1;HNRPD;HNRPD                                             | 0.0125764   | 0.666716606817786    | 0.098058806849051  |
| cg24705286 | 16 | 27215306  | JMJD5;JMJD5;JMJD5                                              | 0.0380714   | 0.978074698512519    | 0.09807822609974   |
| cg21108767 | 7  | 99933721  | PILRB;PMS2L1;PILRB                                             | 0.0273125   | 1.26015774862003     | 0.09807822609974   |
| cg10334739 | 11 | 118376683 | KMT2A;KMT2A                                                    | 0.00669584  | 0.00994626860398026  | 0.09807822609974   |
| cg03877058 | 7  | 129094356 | STRIP2;STRIP2;STRIP2;STRIP2                                    | -0.041621   | -0.0656795973833229  | 0.09807822609974   |
| cg17130567 | 12 | 66218057  | HMG2;RPSAP52;HMG2                                              | 0.0356145   | 0.679276316219966    | 0.0980897710698431 |
| cg23526204 | 20 | 43992176  | SYS1;SYS1-DBNDD2                                               | 0.0470537   | 0.616246463468421    | 0.0980928387071715 |
| cg14805303 | 11 | 118984815 | C2CD2L;C2CD2L                                                  | 0.00834282  | 0.012585101976224    | 0.0980928387071715 |
| cg08317416 | 19 | 52703857  | PPP2R1A;PPP2R1A                                                | -0.070843   | -0.129948577379242   | 0.09810412527671   |
| cg05474467 | 6  | 38608039  | BTBD9;BTBD9                                                    | 0.00685071  | 0.318817054935414    | 0.09810412527671   |
| cg07818869 | 11 | 6495247   | TRIM3;TRIM3                                                    | 0.0373626   | 0.333774190594524    | 0.09810412527671   |
| cg04801971 | 19 | 46011889  | VASP                                                           | 0.00378615  | 0.32926442841641     | 0.09810412527671   |
| cg16308174 | 11 | 70049109  | FADD                                                           | 0.00921498  | 0.546933190312059    | 0.09810412527671   |
| cg18069309 | 15 | 42867567  | STAR2D9                                                        | 0.00427771  | 0.365809771480021    | 0.0981084190236303 |
| cg08730330 | 17 | 61904790  | PSMC5;FTSJ3;FTSJ3                                              | 0.0285435   | 0.770383447531305    | 0.0982051247094847 |
| cg14848284 | 2  | 73143293  | EMX1                                                           | 0.00733189  | 0.668573966815062    | 0.0982051247094847 |
| cg22448601 | 2  | 220253383 | DNPEP                                                          | 0.014608    | 0.567459447260103    | 0.0982051247094847 |
| cg20190456 | 17 | 1897935   | RTN4RL1                                                        | -0.0460671  | -0.0893062703107666  | 0.0982097293960118 |
| cg17431657 | 7  | 99528556  | GJC3                                                           | 0.00483417  | 0.00710707452461653  | 0.0982097293960118 |
| cg22373392 | 17 | 45973408  | SP2                                                            | 0.00281329  | 0.399391846056694    | 0.0982394369804626 |
| cg04242499 | 5  | 140749745 | PCDHGA4;PCDHGB3;PCDHGA1;PCDHGA5;PCDHGB1;PCDHGA3;PCDHGB3;PCDHGA | -0.0440035  | -0.479731470238667   | 0.0982469738601786 |
| cg00177632 | 9  | 34380890  | C9orf24;C9orf24;C9orf24;C9orf24;C9orf24;C9orf24;C9orf24        | 0.00480135  | 0.303926680718537    | 0.0982469738601786 |

|            |    |           |                                 |             |                     |                    |
|------------|----|-----------|---------------------------------|-------------|---------------------|--------------------|
| cg07058132 | 16 | 1755945   | MAPK8IP3;MAPK8IP3               | 0.0262478   | 0.650846315499682   | 0.0982469738601786 |
| cg17347396 | 1  | 54327155  | YIPF1;YIPF1;YIPF1               | 0.00330708  | 0.00485904075835801 | 0.0982469738601786 |
| cg10337377 | 16 | 55746561  |                                 | 0.0234904   | 0.542263013665906   | 0.0982469738601786 |
| cg26577993 | 16 | 89993032  | TUBB3                           | 0.0323439   | 0.341600547446871   | 0.0982469738601786 |
| cg06600200 | 19 | 49455351  |                                 | -0.0496726  | -0.0959773657583543 | 0.0982469738601786 |
| cg06890291 | 7  | 1542315   | INTS1                           | -0.0194055  | -0.0298323713664546 | 0.0982528587619489 |
| cg27159429 | 3  | 160938964 | NMD3                            | 0.00585331  | 0.496066668766122   | 0.0982543837110801 |
| cg08869383 | 1  | 11865661  | CLCN6;CLCN6;MTHFR;CLCN6;CLCN6   | 0.0097274   | 0.46374576588013    | 0.0982543837110801 |
| cg13942312 | 8  | 1995593   | MYOM2                           | 0.0105906   | 0.0161866639382423  | 0.0982743841251369 |
| cg18539474 | 1  | 113933413 | MAGI3;MAGI3                     | 0.00665293  | 0.474910578183164   | 0.0982743841251369 |
| cg23816619 | 15 | 78730509  | IREB2                           | 0.018859    | 1.22269644770086    | 0.0982743841251369 |
| cg10437652 | 5  | 180288206 | ZFP62                           | 0.0256684   | 0.360912162548855   | 0.0982748031925757 |
| cg09620687 | 11 | 109567254 |                                 | 0.00507735  | 0.00845693843058228 | 0.0982797018333889 |
| cg02604839 | 5  | 52897443  | NDUFS4                          | -0.0819162  | -0.159481440524439  | 0.098290585878593  |
| cg04426620 | 10 | 977622    |                                 | 0.00812607  | 0.50814813198709    | 0.0982955707809096 |
| cg01457653 | 16 | 67193218  | FBXL8;TRADD                     | 0.00462134  | 0.42416055544505    | 0.0982955707809096 |
| cg04292718 | 1  | 208084456 | CD34;CD34;CD34;CD34             | 0.0154969   | 0.798062367303037   | 0.0983079262790802 |
| cg21712729 | 17 | 41910036  | MPP3;MPP3                       | 0.0130015   | 0.409375741135933   | 0.0983079262790802 |
| cg07899077 | 22 | 38083744  | NOL12                           | -0.0396866  | -0.0678143172758719 | 0.0983373346706227 |
| cg05338317 | 19 | 10679934  | CDKN2D;CDKN2D                   | -0.003594   | -0.351711201658899  | 0.0983373346706227 |
| cg14258555 | 19 | 50180725  | PRMT1;PRMT1;PRMT1               | 0.0354821   | 1.46313527488925    | 0.0983373346706227 |
| cg04063194 | 19 | 45596745  |                                 | 0.0212776   | 0.678777386781506   | 0.0983373346706227 |
| cg26963797 | 16 | 51189291  |                                 | 0.0221837   | 0.304680093983757   | 0.0983373346706227 |
| cg25951811 | 14 | 96858416  | AK7                             | 0.0625724   | 0.536171130772347   | 0.0983373346706227 |
| cg03726000 | 16 | 19134308  |                                 | -0.0130786  | -0.0195880370943582 | 0.0983373346706227 |
| cg09281539 | 20 | 20693126  | RALGAP2;RALGAP2                 | 0.034814    | 0.729374576690242   | 0.0983373346706227 |
| cg21010407 | 1  | 46955679  |                                 | 0.0330698   | 0.373701110977802   | 0.0983373346706227 |
| cg06081517 | 21 | 45553342  | C21orf33;C21orf33               | 0.00482945  | 0.526443231172569   | 0.0983373346706227 |
| cg21679169 | 1  | 150518766 |                                 | -0.0343308  | -0.0531983909001674 | 0.0983373346706227 |
| cg01419479 | 1  | 182360822 | GLUL;GLUL;GLUL;GLUL;GLUL        | 0.00560443  | 0.595856341239986   | 0.0983373346706227 |
| cg26497076 | 12 | 122512410 |                                 | -0.0760371  | -0.155679331091439  | 0.0984214417279196 |
| cg26483432 | 1  | 149815043 | HIST2H2AA3;HIST2H2AA4           | 0.0174769   | 0.665461584885931   | 0.0984214417279196 |
| cg09053907 | 4  | 75720055  | BTC                             | 0.033925    | 0.48625990959119    | 0.098480950324491  |
| cg23994051 | 10 | 112432175 | RBM20                           | 0.0389447   | 0.839766933560305   | 0.098480950324491  |
| cg06514344 | 19 | 17905835  | B3GNT3                          | 0.0139344   | 0.461175683829604   | 0.098480950324491  |
| cg12164321 | 10 | 125651085 | CPXM2                           | 0.0501537   | 0.522478882494707   | 0.098480950324491  |
| cg00115180 | 11 | 61196867  | SDHAF2;CPSF7;CPSF7;CPSF7        | 0.00898039  | 0.45436995445411    | 0.098480950324491  |
| cg19060203 | 11 | 70150660  | PPFIA1;PPFIA1                   | -0.0385348  | -0.0618034776069273 | 0.0984899315378517 |
| cg03242101 | 16 | 67143792  | C16orf70                        | 0.02512     | 0.621690115467872   | 0.0984899315378517 |
| cg20720059 | 2  | 14772731  | FAM84A                          | 0.00712103  | 0.558730923509042   | 0.0984899315378517 |
| cg25090569 | 5  | 156974558 | ADAM19                          | -0.0331264  | -0.0526559797522243 | 0.0984899315378517 |
| cg10326891 | 4  | 88343821  | NUDT9;NUDT9;NUDT9;NUDT9         | 0.049462    | 0.621280204215685   | 0.0984899315378517 |
| cg21158896 | 11 | 17099219  | RPS13;RPS13                     | 0.00532262  | 0.457109889110886   | 0.0984899315378517 |
| cg22597783 | 1  | 51984800  | EPS15                           | 0.023595    | 0.51149764354938    | 0.0984899315378517 |
| cg09979728 | 19 | 41903455  | BCKDHA;EXOSC5;BCKDHA            | 0.00580079  | 0.482467153880986   | 0.0984899315378517 |
| cg08278741 | 19 | 36736477  |                                 | 0.0367747   | 0.616365466721377   | 0.0984899315378517 |
| cg22279504 | 16 | 54319404  | IRX3                            | 0.0069287   | 0.336818767159038   | 0.0984899315378517 |
| cg26599542 | 14 | 31028234  | G2E3;G2E3                       | 0.026153    | 0.577428977529758   | 0.0984899315378517 |
| cg06322891 | 1  | 23504425  |                                 | 0.0222138   | 0.592722093894623   | 0.0984899315378517 |
| cg01110356 | 6  | 27357008  | ZNF391                          | 0.00563235  | 0.389198764908254   | 0.0984899315378517 |
| cg10194352 | 16 | 55422784  |                                 | -0.101896   | -0.211275659787828  | 0.0984899315378517 |
| cg05874561 | 4  | 154709828 | SFRP2                           | 0.0127746   | 0.549731399641274   | 0.0984899315378517 |
| cg16579347 | 3  | 155572233 | SLC33A1                         | 0.0101085   | 0.671177399482868   | 0.0984899315378517 |
| cg04569888 | 16 | 30538518  | ZNF768                          | 0.0158676   | 0.608996042999733   | 0.0984899315378517 |
| cg12221212 | 1  | 156447424 |                                 | 0.010503    | 0.518059986480234   | 0.0984899315378517 |
| cg13788479 | 15 | 76005247  | CSPG4                           | 0.00847249  | 0.32305515552092    | 0.0984899315378517 |
| cg02505554 | 1  | 202779959 | PCAT6;PCAT6                     | 0.0144835   | 0.508949477979908   | 0.0984899315378517 |
| cg00939627 | 16 | 4994685   |                                 | -0.0670682  | -0.155990983492983  | 0.0984899315378517 |
| cg13564289 | 20 | 62680977  | SOX18;SOX18                     | 0.00608998  | 0.293569692123539   | 0.0984899315378517 |
| cg07773137 | 14 | 73603071  | PSEN1;PSEN1                     | 0.029442    | 0.875247426581122   | 0.0984899315378517 |
| cg14468408 | 9  | 128719060 | PBX3;PBX3;PBX3;PBX3             | -0.014433   | -0.0215903325977921 | 0.0984899315378517 |
| cg21862100 | 22 | 40102855  |                                 | -0.0358871  | -0.0638126827346998 | 0.0984899315378517 |
| cg25507508 | 2  | 59661318  |                                 | -0.023918   | -0.0368484033321315 | 0.0984899315378517 |
| cg18481187 | 6  | 153472898 |                                 | -0.0230362  | -0.037205914327011  | 0.0984899315378517 |
| cg05381183 | 1  | 162025719 |                                 | -0.0505725  | -0.106931675710062  | 0.0984899315378517 |
| cg20493469 | 17 | 76626198  | LOC101928710;LOC101928710       | 0.00825715  | 0.0122819945710048  | 0.0984899315378517 |
| cg04197632 | 2  | 11566584  |                                 | -0.00991364 | -0.0148058392108325 | 0.0984899315378517 |
| cg03095800 | 16 | 67208728  | NOL3                            | 0.0436253   | 0.286441104663336   | 0.0984899315378517 |
| cg06409977 | 17 | 61920084  | SMARCD2;SMARCD2                 | 0.00849433  | 0.472060801677237   | 0.0984899315378517 |
| cg12198977 | 2  | 38623389  |                                 | -0.0198279  | -0.0320517136929156 | 0.0984899315378517 |
| cg22309051 | 8  | 26870611  |                                 | -0.0614191  | -0.1200047918939    | 0.0984899315378517 |
| cg21722700 | 1  | 54691740  | SSBP3;SSBP3;SSBP3               | 0.00221818  | 0.0032720860056189  | 0.0984899315378517 |
| cg09989644 | 1  | 156358119 |                                 | 0.0395753   | 0.514127105225022   | 0.0984899315378517 |
| cg24826645 | 13 | 113952209 | LAMP1                           | 0.0114251   | 0.501026740823669   | 0.0984899315378517 |
| cg09690659 | 20 | 33680871  | TRPC4AP;TRPC4AP                 | 0.0188452   | 0.79145968230665    | 0.0984899315378517 |
| cg10235961 | 3  | 48471218  | PLXNB1;PLXNB1                   | 0.0130617   | 0.431471322167486   | 0.0984899315378517 |
| cg16790682 | 12 | 57984821  | PIP4K2C;PIP4K2C;PIP4K2C;PIP4K2C | 0.0088776   | 0.526896735027454   | 0.0984899315378517 |
| cg14615342 | 8  | 81451707  |                                 | -0.056525   | -0.0964807480654003 | 0.0984899315378517 |
| cg23048660 | 19 | 45004795  | ZNF180                          | 0.0127622   | 0.418858062994796   | 0.0984899315378517 |
| cg03655683 | 2  | 63281383  | OTX1                            | 0.0154418   | 0.37780563594026    | 0.0984899315378517 |
| cg05939335 | 9  | 124132520 | STOM;STOM;STOM;STOM             | 0.0231994   | 0.574146584490963   | 0.0984899315378517 |
| cg25751198 | 12 | 109729573 | FOXN4                           | 0.0250768   | 0.51155921363405    | 0.0984899315378517 |

|            |    |           |                                                                 |             |                      |                     |                    |
|------------|----|-----------|-----------------------------------------------------------------|-------------|----------------------|---------------------|--------------------|
| cg00659495 | 12 | 54520336  | LOC400043                                                       |             | 0.0151259            | 0.546195314973128   | 0.0984899315378517 |
| cg09090048 | 11 | 134093731 | VPS26B;NCAPD3                                                   |             | 0.0510428            | 0.450985233986898   | 0.0984899315378517 |
| cg12307014 | 12 | 51403966  | SLC11A2;SLC11A2;SLC11A2;SLC11A2;SLC11A2;SLC11A2;SLC11A2;SLC11A2 | -0.0388877  | -0.0651218439227533  |                     | 0.0984899315378517 |
| cg01671285 | 1  | 17765232  | RCC2;RCC2                                                       |             | 0.00957776           | 0.571452680945267   | 0.0984899315378517 |
| cg24609530 | 11 | 18610297  | UEVLD;UEVLD                                                     |             | 0.0410615            | 0.751922383206929   | 0.0984899315378517 |
| cg11973777 | 8  | 8244085   |                                                                 |             | 0.0301427            | 0.478877691480675   | 0.0984899315378517 |
| cg21833572 | 1  | 3817804   | LOC100133612;C1orf174                                           |             | 0.00682328           | 0.518899912095351   | 0.0984899315378517 |
| cg13460465 | 19 | 12572864  | ZNF709;ZNF709                                                   | -0.06971    | -0.124543660459304   |                     | 0.0984899315378517 |
| cg01118321 | 1  | 45666712  | ZSWIM5                                                          | -0.0667172  | -0.111905885361132   |                     | 0.0984899315378517 |
| cg02397124 | 6  | 33168279  | SLC39A7;SLC39A7;RXRB;RXRB                                       |             | 0.00861449           | 0.565927885799044   | 0.0984899315378517 |
| cg05171921 | 7  | 157917118 | PTPRN2;PTPRN2;PTPRN2                                            | -0.0496632  | -0.0893271997390624  |                     | 0.0985345873976943 |
| cg00469795 | 21 | 38445171  | PIGP;TTC3;PIGP;PIGP                                             |             | 0.0122914            | 0.492936158673367   | 0.0985345873976943 |
| cg18951977 | 14 | 54421397  | BMP4;BMP4;BMP4                                                  |             | 0.013823             | 0.516556719976504   | 0.0985345873976943 |
| cg08980837 | 1  | 91172337  |                                                                 |             | 0.00528396           | 0.37276582926136    | 0.0985579136413622 |
| cg14789178 | 19 | 5904119   | VMAC;NDUFA11                                                    |             | 0.0398405            | 0.611789564362576   | 0.0986085145760862 |
| cg00427086 | 15 | 52861396  | ARPP19                                                          |             | 0.00963449           | 0.536935212788883   | 0.0986116260758758 |
| cg21157107 | 9  | 110399894 |                                                                 |             | 0.0409743            | 0.254084751954934   | 0.0987080432217433 |
| cg05888406 | 7  | 5280109   |                                                                 |             | 0.00558277           | 0.424268555668805   | 0.0987080432217433 |
| cg20015921 | 15 | 41099716  | ZFYVE19;ZFYVE19;DNAJC17                                         |             | 0.019997             | 0.66125162821626    | 0.0987402556106472 |
| cg14094277 | 2  | 159036756 | CCDC148-AS1;CCDC148;CCDC148                                     | -0.0497779  | -0.0847653354862372  |                     | 0.0987402556106472 |
| cg13519464 | 19 | 9938554   | UBL5;UBL5                                                       |             | 0.0128058            | 0.766657636444562   | 0.0987402556106472 |
| cg14500801 | 4  | 49204696  |                                                                 |             | -0.0865527           | -0.247483467862058  | 0.0987402556106472 |
| cg23098139 | 2  | 10260288  |                                                                 |             | 0.00867127           | 0.370189792923093   | 0.0987702007499148 |
| cg10865368 | 19 | 36134154  | ETV2                                                            |             | 0.0142072            | 0.570958201769915   | 0.0988011164590027 |
| cg25671400 | 1  | 100502496 | HIAT1                                                           | -0.0244914  | -0.0374829052036782  |                     | 0.0988080640647954 |
| cg09551996 | 11 | 69455530  | CCND1                                                           |             | 0.0186677            | 0.359207747710757   | 0.0988277938268281 |
| cg18275495 | 19 | 10527334  | PDE4A                                                           |             | 0.0148141            | 0.64175737854565    | 0.0988277938268281 |
| cg08786822 | 4  | 3109268   | HTT                                                             | -0.00506059 | -0.00743983167498056 |                     | 0.0988277938268281 |
| cg21737024 | 16 | 30441289  | DCTPP1                                                          | -0.00153076 | -0.202971996625228   |                     | 0.0988277938268281 |
| cg21778810 | 5  | 139493680 | PURA                                                            |             | 0.0205365            | 0.464360876927842   | 0.0988277938268281 |
| cg01929065 | 12 | 56122634  | CD63;CD63                                                       |             | 0.00477876           | 0.47225113817084    | 0.0989375059087766 |
| cg06730340 | 3  | 9811714   | CAMK1                                                           |             | 0.0337656            | 0.604979120939132   | 0.0989375059087766 |
| cg12093371 | 10 | 130339316 |                                                                 |             | 0.00835792           | 0.349717846352686   | 0.0989375059087766 |
| cg12641569 | 11 | 70601781  | SHANK2                                                          |             | 0.0121834            | 0.740695322396621   | 0.0989375059087766 |
| cg05341610 | 19 | 57701430  | ZNF264                                                          | -0.103669   | -0.248372867126258   |                     | 0.098944927788196  |
| cg11797226 | 17 | 27028982  | SUPT6H                                                          | -0.0122184  | -0.0181266011752784  |                     | 0.099016272604799  |
| cg25652592 | 1  | 1590640   | CDK11B;CDK11B;CDK11B;CDK11B;CDK11B                              | 0.0119676   | 0.598257291808503    |                     | 0.099016272604799  |
| cg21634331 | 19 | 12985203  | MAST1                                                           | -0.0211825  | -0.0326818945832885  |                     | 0.099016272604799  |
| cg03443205 | 2  | 43454133  | LOC100129726;ZFP36L2                                            | 0.0323977   | 0.900143148758869    |                     | 0.0990761038409221 |
| cg18430990 | 1  | 1475941   | TMEM240                                                         | 0.0288198   | 0.746508373192493    |                     | 0.0990766729759953 |
| cg01116831 | 16 | 2190356   |                                                                 |             | 0.00774247           | 0.0117584715187305  | 0.0990766729759953 |
| cg12251760 | 9  | 130548442 | CDK9                                                            | 0.0282342   | 1.02925953196074     |                     | 0.0990766729759953 |
| cg19160520 | 1  | 226927217 | ITPKB                                                           | -0.0347329  | -0.448811447763962   |                     | 0.0990766729759953 |
| cg16446310 | 19 | 56805883  |                                                                 |             | -0.0145147           | -0.0216292986543507 | 0.0990766729759953 |
| cg06807960 | 7  | 26904159  | SKAP2;SKAP2                                                     | 0.0202266   | 1.0046874200632      |                     | 0.0990766729759953 |
| cg00599043 | 2  | 85876697  |                                                                 |             | 0.00464391           | 0.00687839292839026 | 0.0990766729759953 |
| cg06517246 | 11 | 5267724   | BGLT3                                                           | -0.0474465  | -0.0956483168038226  |                     | 0.0990766729759953 |
| cg05719720 | 13 | 25254963  | ATP12A                                                          | 0.023533    | 0.6275385737077      |                     | 0.0990766729759953 |
| cg26283170 | 11 | 132951950 | OPCML                                                           | 0.0642116   | 0.184799850575548    |                     | 0.0990766729759953 |
| cg11469822 | 12 | 6493196   | LTBR;LTBR                                                       | 0.0218722   | 0.452578419105098    |                     | 0.0990766729759953 |
| cg00898282 | 9  | 111775915 | CTNNA1;CTNNA1                                                   | 0.0290221   | 0.496739702964915    |                     | 0.0990766729759953 |
| cg20060451 | 5  | 179159945 | MAML1;MAML1                                                     | 0.00653799  | 0.529823790404906    |                     | 0.0990766729759953 |
| cg20154657 | 20 | 49126819  | PTPN1                                                           | 0.00659011  | 0.85891233657342     |                     | 0.0990766729759953 |
| cg22729730 | 5  | 6687387   |                                                                 |             | 0.0282665            | 0.557823991867032   | 0.0990766729759953 |
| cg13747962 | 4  | 75720334  | BTC                                                             | -0.0128824  | -0.0197069396377647  |                     | 0.0990766729759953 |
| cg03606214 | 15 | 21135690  | NF1P1                                                           | -0.101749   | -0.208615386626829   |                     | 0.0990766729759953 |
| cg00809934 | 17 | 73201268  | NUP85;NUP85                                                     | 0.00812321  | 0.516502734581856    |                     | 0.0990766729759953 |
| cg19465165 | 2  | 131130103 | PTPN18;PTPN18                                                   | 0.0106552   | 0.343130707319324    |                     | 0.0990766729759953 |
| cg09172423 | 11 | 62446602  | UBXN1                                                           | 0.00643752  | 0.534175056499242    |                     | 0.0990766729759953 |
| cg10684815 | 11 | 9336354   | TMEM41B;TMEM41B;TMEM41B                                         | 0.00751136  | 0.423748280123725    |                     | 0.0991048244674048 |
| cg13884470 | 9  | 86595151  | HNRNPK;HNRNPK;HNRNPK;RMI1;HNRNPK                                | 0.0356939   | 0.249161515299219    |                     | 0.0991689591638574 |
| cg26121782 | 11 | 8284312   | LMO1                                                            | 0.0256703   | 0.88052352148946     |                     | 0.0991689591638574 |
| cg19774424 | 11 | 63439334  | ATL3;ATL3;ATL3                                                  | 0.013447    | 0.699757761860469    |                     | 0.0991689591638574 |
| cg24688471 | 1  | 2542815   | MCEL1                                                           | 0.0353626   | 0.205121262029394    |                     | 0.0991689591638574 |
| cg27359308 | 2  | 122043034 | TFCP2L1                                                         | 0.0315067   | 0.495476125500347    |                     | 0.0991689591638574 |
| cg23680535 | 6  | 36900905  |                                                                 | -0.0156079  | -0.0234652478407269  |                     | 0.0991689591638574 |
| cg10243684 | 6  | 142393383 |                                                                 | -0.035275   | -0.0745932415358243  |                     | 0.0991689591638574 |
| cg12100751 | 1  | 109203672 | C1orf59;C1orf59;C1orf59                                         | 0.0129724   | 0.533284770918152    |                     | 0.0991689591638574 |
| cg12585516 | 4  | 83123547  |                                                                 | -0.0285275  | -0.0450898488557602  |                     | 0.0991689591638574 |
| cg11150308 | 17 | 74068434  | SRP68                                                           | 0.0205361   | 0.534794055850181    |                     | 0.0991689591638574 |
| cg08739576 | 7  | 44144360  | AEBP1                                                           | 0.0223549   | 0.586203372565199    |                     | 0.0991689591638574 |
| cg11175310 | 10 | 16859107  | RSU1;RSU1                                                       | 0.00889485  | 0.678698005365849    |                     | 0.0991689591638574 |
| cg12266953 | 2  | 20866261  | GDF7                                                            | 0.00639644  | 0.408538947145683    |                     | 0.0991689591638574 |
| cg22344578 | 8  | 95908002  | CCNE2                                                           | 0.0107145   | 0.419141092024226    |                     | 0.0991689591638574 |
| cg22674717 | 16 | 51185394  | SALL1;SALL1                                                     | 0.00820489  | 0.364504818422306    |                     | 0.0991689591638574 |
| cg23408670 | 17 | 36831499  | C17orf96                                                        | 0.00857806  | 0.574657493655681    |                     | 0.0991689591638574 |
| cg04942472 | 16 | 58497239  | NDRG4;NDRG4                                                     | 0.0159541   | 0.425156607160078    |                     | 0.0991689591638574 |
| cg08747717 | 16 | 50186775  | PAPD5;PAPD5                                                     | 0.0177539   | 0.503206645107069    |                     | 0.0991689591638574 |
| cg06641959 | 16 | 27325254  | IL4R;IL4R;IL4R;IL4R                                             | 0.00599691  | 0.373176340563501    |                     | 0.0991689591638574 |
| cg25722431 | 7  | 98630446  | LOC101927550;SMURF1;SMURF1;SMURF1                               | -0.0490116  | -0.0795628058422907  |                     | 0.0991689591638574 |
| cg11691298 | 2  | 26396787  | FAM59B                                                          | 0.0346792   | 0.422705371905314    |                     | 0.0991689591638574 |
| cg08154405 | 1  | 156164745 | SLC25A44;SLC25A44;SLC25A44;SLC25A44                             | -0.0252631  | -0.0397233402141699  |                     | 0.0991689591638574 |



|            |    |           |                                                                              |             |                      |                    |
|------------|----|-----------|------------------------------------------------------------------------------|-------------|----------------------|--------------------|
| cg22112712 | 4  | 113557475 | ZGRF1;LARP7;LARP7;LARP7;LARP7                                                | -0.0470619  | -0.445882390134789   | 0.0991689591638574 |
| cg00697301 | 12 | 19936477  |                                                                              | 0.0530278   | 0.0876931967080422   | 0.0992094950588176 |
| cg01545055 | 16 | 67285131  | SLC9A5                                                                       | -0.00928939 | -0.0137893819058941  | 0.0992094950588176 |
| cg19129369 | 4  | 155665249 | LRAT;LRAT                                                                    | 0.0139727   | 0.373410614793817    | 0.0992343573792058 |
| cg02207312 | 11 | 60674164  | PRPF19                                                                       | -0.00188888 | -0.286067679677004   | 0.0992435935047242 |
| cg11677933 | 5  | 96564720  |                                                                              | -0.0511845  | -0.0892527538861672  | 0.0992435935047242 |
| cg20196129 | 10 | 31609347  | ZEB1;ZEB1;LOC220930;ZEB1;ZEB1;ZEB1                                           | 0.00994259  | 0.455167387767737    | 0.0992597764935839 |
| cg20688967 | 10 | 70587120  | STOX1;STOX1;STOX1;STOX1;STOX1                                                | 0.0118336   | 0.635754461413949    | 0.0992597764935839 |
| cg22762076 | 19 | 7069572   | ZNF557;ZNF557;ZNF557;ZNF557;ZNF557;ZNF557                                    | 0.0191116   | 0.741784124980551    | 0.0992597764935839 |
| cg25773620 | 3  | 38071309  | PLCD1                                                                        | 0.0161618   | 0.44595035371771     | 0.0992597764935839 |
| cg15980735 | 7  | 44223845  | GCK                                                                          | -0.0379078  | -0.0653541094412472  | 0.0992626452446087 |
| cg11793978 | 5  | 135188477 | LOC153328                                                                    | -0.020547   | -0.0319941756107149  | 0.0992995643413182 |
| cg21715802 | 8  | 126424176 |                                                                              | -0.0213671  | -0.032745887346788   | 0.0993063564372709 |
| cg09424415 | 7  | 23530240  | RPS2P32                                                                      | 0.036931    | 0.179187567108445    | 0.0993898711611646 |
| cg24828989 | 17 | 9579648   | USP43;USP43                                                                  | -0.0442427  | -0.0769415166661339  | 0.0994155319490146 |
| cg22353818 | 14 | 104095074 | KLC1;KLC1;KLC1                                                               | 0.00815675  | 0.5217800145265      | 0.0994756168685916 |
| cg16838574 | 3  | 17784164  |                                                                              | 0.0324812   | 0.26125324718752     | 0.0994756168685916 |
| cg26199906 | 8  | 145106246 | OPLAH                                                                        | 0.027582    | 0.61689634992405     | 0.0994756168685916 |
| cg08042975 | 2  | 213402433 | ERBB4;ERBB4                                                                  | 0.0302957   | 0.852380817850502    | 0.0994756168685916 |
| cg12494528 | 4  | 871567    | GAK                                                                          | -0.00532441 | -0.00783990231049153 | 0.0994756168685916 |
| cg13597632 | 5  | 43313634  | HMGCS1;HMGCS1                                                                | 0.00852558  | 0.452109270089775    | 0.0994756168685916 |
| cg20023231 | 16 | 22825282  | HS3ST2                                                                       | 0.019751    | 0.477840980419842    | 0.0994756168685916 |
| cg27192138 | 6  | 11160380  |                                                                              | -0.0143822  | -0.0217863179532896  | 0.0994756168685916 |
| cg14010619 | 19 | 39612741  |                                                                              | 0.0367624   | 0.296486282993766    | 0.0994756168685916 |
| cg05267934 | 3  | 142654877 | LOC100507389                                                                 | -0.055045   | -0.108016292937743   | 0.0994756168685916 |
| cg22659936 | 3  | 129930455 | COL6A4P2                                                                     | -0.0278088  | -0.042956962196857   | 0.0994756168685916 |
| cg15209489 | 10 | 76819644  | DUPD1                                                                        | -0.0116261  | -0.0172185616905448  | 0.0994756168685916 |
| cg23719091 | 5  | 135468815 | SMAD5-AS1;SMAD5;SMAD5;SMAD5                                                  | 0.0119008   | 0.543786082625207    | 0.0994756168685916 |
| cg04423696 | 17 | 45249385  | CDC27;CDC27;CDC27;CDC27                                                      | -0.0814126  | -0.165531665111146   | 0.0994756168685916 |
| cg02796905 | 15 | 59063699  | FAM63B;FAM63B                                                                | 0.00761433  | 0.52339292330213     | 0.0994756168685916 |
| cg15772797 | 12 | 123868662 | SETD8                                                                        | 0.0256197   | 1.27331957151659     | 0.0994756168685916 |
| cg10437425 | 11 | 6474577   | TRIM3;TRIM3;TRIM3;TRIM3                                                      | 0.0123227   | 0.019621979493223    | 0.0994756168685916 |
| cg14527148 | 15 | 80216341  | C15orf37;ST20                                                                | 0.0320312   | 0.599312265175125    | 0.0994756168685916 |
| cg20082830 | 2  | 232395355 | NMUR1                                                                        | 0.019487    | 0.550927360876442    | 0.0994756168685916 |
| cg10885414 | 5  | 138609328 | MATR3;MATR3;MATR3;SNHG4;SNHG4                                                | 0.00410977  | 0.384514972904554    | 0.0994756168685916 |
| cg11979294 | 10 | 103880575 | LDB1                                                                         | 0.0335068   | 0.409439831366956    | 0.0994756168685916 |
| cg25340121 | 19 | 23653200  |                                                                              | -0.0540843  | -0.09973688994060603 | 0.0994756168685916 |
| cg00345047 | 6  | 71942797  |                                                                              | -0.0410971  | -0.0777298829826096  | 0.0994853966326336 |
| cg00010266 | 8  | 145734519 | MFSD3                                                                        | 0.0217618   | 0.917246642687987    | 0.0995236504861325 |
| cg23061046 | 19 | 52206224  | NCRNA00085                                                                   | 0.0443829   | 0.332051577885484    | 0.0995773411534889 |
| cg12981595 | 17 | 39254427  | KRTAP4-8                                                                     | -0.107655   | -0.190947781598371   | 0.0995773411534889 |
| cg26208419 | 5  | 473447    | SLC9A3;LOC25845                                                              | 0.0154594   | 0.327630026168242    | 0.0995773411534889 |
| cg23378706 | 5  | 81047486  | SSBP2                                                                        | 0.00605003  | 0.336894751570249    | 0.0995773411534889 |
| cg06701285 | 6  | 30733368  |                                                                              | -0.0467928  | -0.0918055790285471  | 0.0996172398450439 |
| cg17606115 | 3  | 50266316  | GNAI2;GNAI2                                                                  | 0.0107157   | 0.0163027787251601   | 0.0996172398450439 |
| cg12614029 | 11 | 2160564   | INS-IGF2;IGF2AS;IGF2;IGF2AS;IGF2                                             | 0.0111487   | 0.377025390595103    | 0.0996172398450439 |
| cg06388809 | 9  | 130616976 | ENG;ENG;ENG;ENG                                                              | 0.00800378  | 0.292220575714524    | 0.099619755791151  |
| cg01053943 | 2  | 120239310 | SCTR                                                                         | -0.0109688  | -0.0164696595146784  | 0.099619755791151  |
| cg18425254 | 13 | 113549044 |                                                                              | 0.0241834   | 0.611456229749515    | 0.099619755791151  |
| cg16510127 | 1  | 156047359 | MEX3A                                                                        | -0.0151837  | -0.022844452336848   | 0.099619755791151  |
| cg19115393 | 20 | 59829060  | CDH4                                                                         | 0.0109172   | 0.455361685895092    | 0.0996227463198512 |
| cg03727342 | 9  | 6758683   | KDM4C;KDM4C;KDM4C;KDM4C                                                      | 0.0195819   | 0.765025069643774    | 0.0996227463198512 |
| cg19065831 | 4  | 48485289  | SLC10A4                                                                      | 0.0183542   | 0.524609131134053    | 0.0996227463198512 |
| cg16128308 | 3  | 49132079  | QRICH1;QRICH1                                                                | 0.00253456  | 0.294406255054472    | 0.0996227463198512 |
| cg06927064 | 15 | 90776918  | CIB1;CIB1;CIB1;GDPGP1;CIB1;CIB1;CIB1;CIB1;CIB1;CIB1;CIB1;CIB1;CIB1;CIB1;CIB1 | 0.0114768   | 0.523515014294325    | 0.0996227463198512 |
| cg17064564 | 22 | 29710817  | RASL10A;RASL10A                                                              | 0.0317613   | 0.599789099479894    | 0.0996227463198512 |
| cg26859862 | 16 | 30389551  | SEPT1                                                                        | 0.024383    | 0.704427672218004    | 0.0996227463198512 |
| cg14058383 | 6  | 28603099  |                                                                              | 0.00813371  | 0.309854707216421    | 0.0996227463198512 |
| cg26938153 | 7  | 137686926 | CREB3L2                                                                      | 0.00921233  | 0.538779143915583    | 0.0996227463198512 |
| cg12587618 | 11 | 1979879   |                                                                              | -0.0307427  | -0.0470587417974371  | 0.0996227463198512 |
| cg10195567 | 7  | 72987827  | TBL2                                                                         | 0.00299981  | 0.00440066328757395  | 0.0996227463198512 |
| cg01786715 | 14 | 65007437  | HSPA2;HSPA2                                                                  | 0.00896538  | 0.582575635400002    | 0.0996401468984323 |
| cg27070729 | 16 | 28964954  | NFATC2IP                                                                     | -0.0127547  | -0.0190508706926272  | 0.0996401468984323 |
| cg00383384 | 10 | 57391271  |                                                                              | 0.0144551   | 0.532044431005638    | 0.0996401468984323 |
| cg20192527 | 10 | 126077794 |                                                                              | 0.00845285  | 0.509087092261193    | 0.0996401468984323 |
| cg23758016 | 17 | 73521635  | LLGL2;LLGL2;LLGL2                                                            | 0.0302499   | 0.630470651617981    | 0.0996718613274861 |
| cg15144793 | 2  | 235861303 | SH3BP4                                                                       | 0.00609464  | 0.317226003030101    | 0.0996840623901426 |
| cg08224569 | 8  | 142369705 | GPR20                                                                        | 0.0600684   | 0.243675829507528    | 0.0996840623901426 |
| cg08630962 | 1  | 179262864 | SOAT1                                                                        | 0.0103243   | 0.592678881776952    | 0.0997075159070195 |
| cg05370569 | 16 | 23464705  | COG7                                                                         | 0.0112257   | 0.442838186949058    | 0.0997075159070195 |
| cg13971571 | 8  | 6693247   | XKR5                                                                         | 0.0115334   | 0.384116203251004    | 0.0997075159070195 |
| cg13473179 | 9  | 15422943  | SNAPC3                                                                       | 0.00967267  | 0.597330966526156    | 0.0998304212779876 |
| cg27029077 | 4  | 137753156 |                                                                              | -0.0817893  | -0.178104149802947   | 0.099931808017003  |
| cg03295933 | 19 | 1479358   | C19orf25                                                                     | 0.0270405   | 0.718952412802738    | 0.099931808017003  |
| cg19095784 | 6  | 37070475  |                                                                              | 0.0144308   | 0.371494114327654    | 0.099931808017003  |
| cg05879919 | 14 | 102976503 | ANKRD9                                                                       | 0.00713512  | 0.648196802025723    | 0.099931808017003  |
| cg22043745 | 8  | 11565527  | GATA4;GATA4;GATA4;GATA4                                                      | 0.0153138   | 0.373728961772489    | 0.0999334499174577 |
| cg10984017 | 2  | 121010993 | RALB                                                                         | 0.026858    | 0.798946121034588    | 0.0999552063464506 |
| cg13777717 | 5  | 76250527  | CRHBP                                                                        | 0.0510826   | 0.764089948043319    | 0.099970941021729  |
| cg11149849 | 17 | 1064017   | ABR;ABR                                                                      | -0.0414173  | -0.0799107351570193  | 0.0999948976521798 |
| cg11239016 | 16 | 90085722  | DBNDD1                                                                       | 0.00428672  | 0.451883392487494    | 0.0999948976521798 |
| cg00116628 | 5  | 111755514 | FLJ11235;EPB41L4A                                                            | 0.0274019   | 0.829348661482635    | 0.0999948976521798 |

|                   |    |           |                             |            |                   |                    |
|-------------------|----|-----------|-----------------------------|------------|-------------------|--------------------|
| <b>cg20342853</b> | 6  | 15245700  | JARID2                      | 0.00293526 | 0.289141556615811 | 0.0999948976521798 |
| <b>cg16068620</b> | 6  | 88032455  | C6orf162;C6orf162;GJB7      | 0.015089   | 0.477666731731662 | 0.0999948976521798 |
| <b>cg16001793</b> | 1  | 161369711 |                             | 0.0165686  | 0.678324330800394 | 0.0999948976521798 |
| <b>cg00109643</b> | 11 | 85780154  | PICALM;PICALM;PICALM;PICALM | 0.0157605  | 0.675879454672502 | 0.0999948976521798 |
