# Supplementary material for: Redox Imbalance and Methylation Disturbances in Early Childhood Obesity
Source: Hindawi journal article supplement (doi:10.1155/2021/2207125), 2021-01-01
Supplement: f3 [file 2207125.f3.pdf]

| GO term    | Description                                             | Observed Gene Count | Background | Strength | FDR      |
|------------|---------------------------------------------------------|---------------------|------------|----------|----------|
| GO:0006979 | response to oxidative stress                            | 10                  | 373        | 1.32     | 2.51e-08 |
| GO:0055114 | oxidation-reduction process                             | 13                  | 932        | 1.04     | 2.51e-08 |
| GO:0000096 | sulfur amino acid metabolic process                     | 5                   | 39         | 2.0      | 7.65e-07 |
| GO:0001666 | response to hypoxia                                     | 8                   | 288        | 1.34     | 7.65e-07 |
| GO:0009628 | response to abiotic stimulus                            | 12                  | 1052       | 0.95     | 7.65e-07 |
| GO:0009636 | response to toxic substance                             | 9                   | 468        | 1.18     | 7.68e-07 |
| GO:0046500 | S-adenosylmethionine metabolic process                  | 4                   | 13         | 2.38     | 7.68e-07 |
| GO:0097237 | cellular response to toxic substance                    | 7                   | 195        | 1.45     | 7.68e-07 |
| GO:1901700 | response to oxygen-containing compound                  | 13                  | 1427       | 0.85     | 7.68e-07 |
| GO:0006790 | sulfur compound metabolic process                       | 8                   | 343        | 1.26     | 9.32e-07 |
| GO:0034599 | cellular response to oxidative stress                   | 7                   | 222        | 1.39     | 1.16e-06 |
| GO:0006555 | methionine metabolic process                            | 4                   | 20         | 2.19     | 2.12e-06 |
| GO:0090116 | C-5 methylation of cytosine                             | 3                   | 3          | 2.89     | 3.36e-06 |
| GO:0032259 | methylation                                             | 7                   | 288        | 1.28     | 5.36e-06 |
| GO:0051186 | cofactor metabolic process                              | 8                   | 467        | 1.13     | 6.48e-06 |
| GO:0098869 | cellular oxidant detoxification                         | 5                   | 86         | 1.66     | 6.92e-06 |
| GO:0000302 | response to reactive oxygen species                     | 6                   | 189        | 1.4      | 8.16e-06 |
| GO:0006575 | cellular modified amino acid metabolic process          | 6                   | 185        | 1.4      | 8.16e-06 |
| GO:0033554 | cellular response to stress                             | 12                  | 1553       | 0.78     | 8.16e-06 |
| GO:0072593 | reactive oxygen species metabolic process               | 5                   | 103        | 1.58     | 1.24e-05 |
| GO:0006306 | DNA methylation                                         | 4                   | 46         | 1.83     | 2.42e-05 |
| GO:0043066 | negative regulation of apoptotic process                | 9                   | 859        | 0.91     | 3.34e-05 |
| GO:0017144 | drug metabolic process                                  | 8                   | 622        | 1.0      | 3.46e-05 |
| GO:1901701 | cellular response to oxygen-containing compound         | 9                   | 896        | 0.9      | 4.14e-05 |
| GO:0042493 | response to drug                                        | 9                   | 900        | 0.89     | 4.17e-05 |
| GO:0050667 | homocysteine metabolic process                          | 3                   | 13         | 2.26     | 4.17e-05 |
| GO:0031667 | response to nutrient levels                             | 7                   | 455        | 1.08     | 5.07e-05 |
| GO:0006732 | coenzyme metabolic process                              | 6                   | 297        | 1.2      | 6.52e-05 |
| GO:0010941 | regulation of cell death                                | 11                  | 1638       | 0.72     | 7.01e-05 |
| GO:0051881 | regulation of mitochondrial membrane potential          | 4                   | 68         | 1.66     | 7.01e-05 |
| GO:0071453 | cellular response to oxygen levels                      | 5                   | 164        | 1.38     | 7.01e-05 |
| GO:0006520 | cellular amino acid metabolic process                   | 6                   | 308        | 1.18     | 7.08e-05 |
| GO:0046655 | folic acid metabolic process                            | 3                   | 18         | 2.12     | 7.52e-05 |
| GO:0000303 | response to superoxide                                  | 3                   | 19         | 2.09     | 8.51e-05 |
| GO:1905710 | positive regulation of membrane permeability            | 3                   | 23         | 2.01     | 0.00013  |
| GO:0006730 | one-carbon metabolic process                            | 3                   | 24         | 1.99     | 0.00014  |
| GO:0019725 | cellular homeostasis                                    | 8                   | 806        | 0.89     | 0.00014  |
| GO:0031323 | regulation of cellular metabolic process                | 19                  | 6082       | 0.39     | 0.00014  |
| GO:0033273 | response to vitamin                                     | 4                   | 87         | 1.56     | 0.00014  |
| GO:0051246 | regulation of protein metabolic process                 | 13                  | 2668       | 0.58     | 0.00015  |
| GO:0007584 | response to nutrient                                    | 5                   | 208        | 1.27     | 0.00016  |
| GO:1901605 | alpha-amino acid metabolic process                      | 5                   | 209        | 1.27     | 0.00017  |
| GO:0019752 | carboxylic acid metabolic process                       | 8                   | 854        | 0.87     | 0.00018  |
| GO:0042592 | homeostatic process                                     | 10                  | 1491       | 0.72     | 0.00018  |
| GO:0042981 | regulation of apoptotic process                         | 10                  | 1501       | 0.72     | 0.00019  |
| GO:0006950 | response to stress                                      | 14                  | 3267       | 0.53     | 0.00021  |
| GO:0043200 | response to amino acid                                  | 4                   | 103        | 1.48     | 0.00022  |
| GO:0043414 | macromolecule methylation                               | 5                   | 229        | 1.23     | 0.00022  |
| GO:0042743 | hydrogen peroxide metabolic process                     | 3                   | 31         | 1.88     | 0.00023  |
| GO:0032268 | regulation of cellular protein metabolic process        | 12                  | 2486       | 0.58     | 0.00037  |
| GO:0034614 | cellular response to reactive oxygen species            | 4                   | 124        | 1.4      | 0.00039  |
| GO:1901698 | response to nitrogen compound                           | 8                   | 988        | 0.8      | 0.00042  |
| GO:0043603 | cellular amide metabolic process                        | 7                   | 732        | 0.87     | 0.00054  |
| GO:0009605 | response to external stimulus                           | 11                  | 2152       | 0.6      | 0.00055  |
| GO:0042221 | response to chemical                                    | 15                  | 4153       | 0.45     | 0.00055  |
| GO:0010035 | response to inorganic substance                         | 6                   | 491        | 0.98     | 0.00056  |
| GO:0071456 | cellular response to hypoxia                            | 4                   | 139        | 1.35     | 0.00056  |
| GO:0035694 | mitochondrial protein catabolic process                 | 2                   | 5          | 2.5      | 0.00058  |
| GO:0044281 | small molecule metabolic process                        | 10                  | 1779       | 0.64     | 0.00063  |
| GO:0046677 | response to antibiotic                                  | 5                   | 305        | 1.11     | 0.00068  |
| GO:0070887 | cellular response to chemical stimulus                  | 12                  | 2672       | 0.55     | 0.00068  |
| GO:0035690 | cellular response to drug                               | 5                   | 310        | 1.1      | 0.00071  |
| GO:0046498 | S-adenosylhomocysteine metabolic process                | 2                   | 6          | 2.42     | 0.00072  |
| GO:0001101 | response to acid chemical                               | 5                   | 323        | 1.08     | 0.00083  |
| GO:0008152 | metabolic process                                       | 22                  | 9569       | 0.26     | 0.00083  |
| GO:0065007 | biological regulation                                   | 24                  | 11740      | 0.2      | 0.00083  |
| GO:0010940 | positive regulation of necrotic cell death              | 2                   | 7          | 2.35     | 0.00089  |
| GO:0009893 | positive regulation of metabolic process                | 13                  | 3280       | 0.49     | 0.00091  |
| GO:0031060 | regulation of histone methylation                       | 3                   | 58         | 1.61     | 0.00097  |
| GO:0010917 | negative regulation of mitochondrial membrane potential | 2                   | 8          | 2.29     | 0.0011   |

|            |                                                                                           |    |       |      |        |
|------------|-------------------------------------------------------------------------------------------|----|-------|------|--------|
| GO:0043045 | DNA methylation involved in embryo development                                            | 2  | 8     | 2.29 | 0.0011 |
| GO:0010243 | response to organonitrogen compound                                                       | 7  | 876   | 0.8  | 0.0013 |
| GO:0035999 | tetrahydrofolate interconversion                                                          | 2  | 9     | 2.24 | 0.0013 |
| GO:1903201 | regulation of oxidative stress-induced cell death                                         | 3  | 65    | 1.56 | 0.0013 |
| GO:0045454 | cell redox homeostasis                                                                    | 3  | 68    | 1.54 | 0.0014 |
| GO:0051247 | positive regulation of protein metabolic process                                          | 9  | 1587  | 0.65 | 0.0014 |
| GO:0051573 | negative regulation of histone H3-K9 methylation                                          | 2  | 10    | 2.19 | 0.0014 |
| GO:0043523 | regulation of neuron apoptotic process                                                    | 4  | 195   | 1.21 | 0.0015 |
| GO:0006915 | apoptotic process                                                                         | 7  | 915   | 0.78 | 0.0016 |
| GO:1901564 | organonitrogen compound metabolic process                                                 | 16 | 5281  | 0.37 | 0.0016 |
| GO:0080090 | regulation of primary metabolic process                                                   | 17 | 5982  | 0.35 | 0.0017 |
| GO:0009086 | methionine biosynthetic process                                                           | 2  | 12    | 2.12 | 0.0018 |
| GO:0010942 | positive regulation of cell death                                                         | 6  | 663   | 0.85 | 0.0020 |
| GO:0031325 | positive regulation of cellular metabolic process                                         | 12 | 3060  | 0.49 | 0.0020 |
| GO:0019430 | removal of superoxide radicals                                                            | 2  | 13    | 2.08 | 0.0021 |
| GO:0048518 | positive regulation of biological process                                                 | 16 | 5459  | 0.36 | 0.0022 |
| GO:0000098 | sulfur amino acid catabolic process                                                       | 2  | 14    | 2.05 | 0.0023 |
| GO:0006534 | cysteine metabolic process                                                                | 2  | 14    | 2.05 | 0.0023 |
| GO:0019372 | lipoxygenase pathway                                                                      | 2  | 14    | 2.05 | 0.0023 |
| GO:0048522 | positive regulation of cellular process                                                   | 15 | 4898  | 0.38 | 0.0025 |
| GO:0097345 | mitochondrial outer membrane permeabilization                                             | 2  | 15    | 2.02 | 0.0025 |
| GO:0043154 | negative regulation of cysteine-type endopeptidase activity involved in apoptotic process | 3  | 91    | 1.41 | 0.0026 |
| GO:0051341 | regulation of oxidoreductase activity                                                     | 3  | 93    | 1.4  | 0.0027 |
| GO:0051571 | positive regulation of histone H3-K4 methylation                                          | 2  | 16    | 1.99 | 0.0027 |
| GO:0070131 | positive regulation of mitochondrial translation                                          | 2  | 17    | 1.96 | 0.0029 |
| GO:0040029 | regulation of gene expression, epigenetic                                                 | 4  | 251   | 1.1  | 0.0031 |
| GO:0050794 | regulation of cellular process                                                            | 22 | 10484 | 0.22 | 0.0031 |
| GO:0033189 | response to vitamin A                                                                     | 2  | 19    | 1.92 | 0.0033 |
| GO:0009410 | response to xenobiotic stimulus                                                           | 4  | 262   | 1.08 | 0.0034 |
| GO:0048523 | negative regulation of cellular process                                                   | 14 | 4454  | 0.39 | 0.0034 |
| GO:0033194 | response to hydroperoxide                                                                 | 2  | 20    | 1.89 | 0.0036 |
| GO:0042744 | hydrogen peroxide catabolic process                                                       | 2  | 20    | 1.89 | 0.0036 |
| GO:0032270 | positive regulation of cellular protein metabolic process                                 | 8  | 1496  | 0.62 | 0.0039 |
| GO:0042542 | response to hydrogen peroxide                                                             | 3  | 112   | 1.32 | 0.0039 |
| GO:0055093 | response to hyperoxia                                                                     | 2  | 21    | 1.87 | 0.0039 |
| GO:0051171 | regulation of nitrogen compound metabolic process                                         | 16 | 5827  | 0.33 | 0.0040 |
| GO:0048871 | multicellular organismal homeostasis                                                      | 4  | 283   | 1.04 | 0.0042 |
| GO:0045814 | negative regulation of gene expression, epigenetic                                        | 3  | 117   | 1.3  | 0.0043 |
| GO:0016999 | antibiotic metabolic process                                                              | 3  | 124   | 1.28 | 0.0049 |
| GO:0071496 | cellular response to external stimulus                                                    | 4  | 305   | 1.01 | 0.0052 |
| GO:0051354 | negative regulation of oxidoreductase activity                                            | 2  | 27    | 1.76 | 0.0054 |
| GO:0065008 | regulation of biological quality                                                          | 12 | 3559  | 0.42 | 0.0056 |
| GO:0045471 | response to ethanol                                                                       | 3  | 134   | 1.24 | 0.0059 |
| GO:0060255 | regulation of macromolecule metabolic process                                             | 16 | 6072  | 0.31 | 0.0059 |
| GO:1901699 | cellular response to nitrogen compound                                                    | 5  | 568   | 0.84 | 0.0059 |
| GO:0006807 | nitrogen compound metabolic process                                                       | 19 | 8349  | 0.25 | 0.0063 |
| GO:0043524 | negative regulation of neuron apoptotic process                                           | 3  | 138   | 1.23 | 0.0063 |
| GO:1902175 | regulation of oxidative stress-induced intrinsic apoptotic signaling pathway              | 2  | 30    | 1.72 | 0.0063 |
| GO:0042311 | vasodilation                                                                              | 2  | 31    | 1.7  | 0.0066 |
| GO:0071276 | cellular response to cadmium ion                                                          | 2  | 31    | 1.7  | 0.0066 |
| GO:0010639 | negative regulation of organelle organization                                             | 4  | 333   | 0.97 | 0.0067 |
| GO:0010038 | response to metal ion                                                                     | 4  | 339   | 0.97 | 0.0071 |
| GO:0010821 | regulation of mitochondrion organization                                                  | 3  | 148   | 1.2  | 0.0073 |
| GO:0010212 | response to ionizing radiation                                                            | 3  | 149   | 1.2  | 0.0074 |
| GO:0010001 | glial cell differentiation                                                                | 3  | 154   | 1.18 | 0.0080 |
| GO:1903146 | regulation of autophagy of mitochondrion                                                  | 2  | 35    | 1.65 | 0.0080 |
| GO:0043412 | macromolecule modification                                                                | 11 | 3197  | 0.43 | 0.0082 |
| GO:0031399 | regulation of protein modification process                                                | 8  | 1747  | 0.55 | 0.0084 |
| GO:0051129 | negative regulation of cellular component organization                                    | 5  | 632   | 0.79 | 0.0084 |
| GO:0071248 | cellular response to metal ion                                                            | 3  | 162   | 1.16 | 0.0089 |
| GO:0009719 | response to endogenous stimulus                                                           | 7  | 1353  | 0.61 | 0.0091 |
| GO:0051402 | neuron apoptotic process                                                                  | 2  | 40    | 1.59 | 0.0097 |
| GO:2000377 | regulation of reactive oxygen species metabolic process                                   | 3  | 169   | 1.14 | 0.0097 |
| GO:0009892 | negative regulation of metabolic process                                                  | 10 | 2762  | 0.45 | 0.0098 |
| GO:0055086 | nucleobase-containing small molecule metabolic process                                    | 5  | 662   | 0.77 | 0.0098 |
| GO:0017001 | antibiotic catabolic process                                                              | 2  | 42    | 1.57 | 0.0103 |
| GO:0032269 | negative regulation of cellular protein metabolic process                                 | 6  | 1014  | 0.67 | 0.0106 |
| GO:0048678 | response to axon injury                                                                   | 2  | 43    | 1.56 | 0.0107 |
| GO:1903202 | negative regulation of oxidative stress-induced cell death                                | 2  | 44    | 1.55 | 0.0111 |
| GO:0044237 | cellular metabolic process                                                                | 19 | 8797  | 0.23 | 0.0115 |
| GO:0090199 | regulation of release of cytochrome c from mitochondria                                   | 2  | 45    | 1.54 | 0.0115 |
| GO:0048872 | homeostasis of number of cells                                                            | 3  | 193   | 1.09 | 0.0131 |

|            |                                                                  |    |       |      |        |
|------------|------------------------------------------------------------------|----|-------|------|--------|
| GO:0010823 | negative regulation of mitochondrion organization                | 2  | 50    | 1.5  | 0.0134 |
| GO:0097366 | response to bronchodilator                                       | 2  | 50    | 1.5  | 0.0134 |
| GO:2000378 | negative regulation of reactive oxygen species metabolic process | 2  | 50    | 1.5  | 0.0134 |
| GO:0042220 | response to cocaine                                              | 2  | 51    | 1.49 | 0.0136 |
| GO:0006749 | glutathione metabolic process                                    | 2  | 52    | 1.48 | 0.0141 |
| GO:0051187 | cofactor catabolic process                                       | 2  | 52    | 1.48 | 0.0141 |
| GO:0009890 | negative regulation of biosynthetic process                      | 7  | 1501  | 0.56 | 0.0143 |
| GO:0031329 | regulation of cellular catabolic process                         | 5  | 743   | 0.72 | 0.0143 |
| GO:0051173 | positive regulation of nitrogen compound metabolic process       | 10 | 2946  | 0.42 | 0.0143 |
| GO:0031669 | cellular response to nutrient levels                             | 3  | 206   | 1.06 | 0.0146 |
| GO:0071495 | cellular response to endogenous stimulus                         | 6  | 1106  | 0.63 | 0.0146 |
| GO:0031324 | negative regulation of cellular metabolic process                | 9  | 2463  | 0.46 | 0.0153 |
| GO:0015980 | energy derivation by oxidation of organic compounds              | 3  | 217   | 1.03 | 0.0165 |
| GO:0016239 | positive regulation of macroautophagy                            | 2  | 59    | 1.42 | 0.0168 |
| GO:0090066 | regulation of anatomical structure size                          | 4  | 464   | 0.83 | 0.0168 |
| GO:0031401 | positive regulation of protein modification process              | 6  | 1149  | 0.61 | 0.0170 |
| GO:0006839 | mitochondrial transport                                          | 3  | 223   | 1.02 | 0.0171 |
| GO:0010660 | regulation of muscle cell apoptotic process                      | 2  | 60    | 1.42 | 0.0171 |
| GO:0033043 | regulation of organelle organization                             | 6  | 1155  | 0.61 | 0.0171 |
| GO:0071230 | cellular response to amino acid stimulus                         | 2  | 60    | 1.42 | 0.0171 |
| GO:0071704 | organic substance metabolic process                              | 19 | 9135  | 0.21 | 0.0171 |
| GO:0006112 | energy reserve metabolic process                                 | 2  | 62    | 1.4  | 0.0177 |
| GO:0045892 | negative regulation of transcription, DNA-templated              | 6  | 1169  | 0.6  | 0.0178 |
| GO:0072521 | purine-containing compound metabolic process                     | 4  | 478   | 0.82 | 0.0178 |
| GO:0010604 | positive regulation of macromolecule metabolic process           | 10 | 3081  | 0.4  | 0.0182 |
| GO:0071417 | cellular response to organonitrogen compound                     | 4  | 485   | 0.81 | 0.0185 |
| GO:0051716 | cellular response to stimulus                                    | 15 | 6212  | 0.28 | 0.0192 |
| GO:0044248 | cellular catabolic process                                       | 7  | 1646  | 0.52 | 0.0210 |
| GO:0009725 | response to hormone                                              | 5  | 854   | 0.66 | 0.0224 |
| GO:0072347 | response to anesthetic                                           | 2  | 73    | 1.33 | 0.0224 |
| GO:0007568 | aging                                                            | 3  | 255   | 0.96 | 0.0227 |
| GO:0050896 | response to stimulus                                             | 17 | 7824  | 0.23 | 0.0234 |
| GO:0014070 | response to organic cyclic compound                              | 5  | 873   | 0.65 | 0.0242 |
| GO:0060047 | heart contraction                                                | 2  | 81    | 1.29 | 0.0266 |
| GO:0034641 | cellular nitrogen compound metabolic process                     | 13 | 5126  | 0.3  | 0.0278 |
| GO:0030148 | sphingolipid biosynthetic process                                | 2  | 86    | 1.26 | 0.0295 |
| GO:0044283 | small molecule biosynthetic process                              | 4  | 569   | 0.74 | 0.0295 |
| GO:0010506 | regulation of autophagy                                          | 3  | 286   | 0.91 | 0.0299 |
| GO:0044238 | primary metabolic process                                        | 18 | 8808  | 0.2  | 0.0306 |
| GO:0010033 | response to organic substance                                    | 9  | 2815  | 0.4  | 0.0315 |
| GO:0021782 | glial cell development                                           | 2  | 91    | 1.24 | 0.0320 |
| GO:0097190 | apoptotic signaling pathway                                      | 3  | 295   | 0.9  | 0.0320 |
| GO:0051172 | negative regulation of nitrogen compound metabolic process       | 8  | 2307  | 0.43 | 0.0324 |
| GO:0010628 | positive regulation of gene expression                           | 7  | 1826  | 0.48 | 0.0332 |
| GO:1901565 | organonitrogen compound catabolic process                        | 5  | 958   | 0.61 | 0.0333 |
| GO:0009987 | cellular process                                                 | 24 | 14652 | 0.11 | 0.0341 |
| GO:0046394 | carboxylic acid biosynthetic process                             | 3  | 311   | 0.88 | 0.0359 |
| GO:0046916 | cellular transition metal ion homeostasis                        | 2  | 99    | 1.2  | 0.0359 |
| GO:0045444 | fat cell differentiation                                         | 2  | 100   | 1.19 | 0.0362 |
| GO:0002262 | myeloid cell homeostasis                                         | 2  | 102   | 1.19 | 0.0375 |
| GO:0048878 | chemical homeostasis                                             | 5  | 995   | 0.59 | 0.0375 |
| GO:0071236 | cellular response to antibiotic                                  | 2  | 112   | 1.15 | 0.0436 |
| GO:0042737 | drug catabolic process                                           | 2  | 113   | 1.14 | 0.0442 |
| GO:0055082 | cellular chemical homeostasis                                    | 4  | 665   | 0.67 | 0.0449 |
| GO:0032147 | activation of protein kinase activity                            | 3  | 347   | 0.83 | 0.0452 |
| GO:0006325 | chromatin organization                                           | 4  | 683   | 0.66 | 0.0484 |
| GO:0060359 | response to ammonium ion                                         | 2  | 122   | 1.11 | 0.0496 |
